# Supplementary material for: Streamlining the use of BOLD specimen data to record species distributions: a case study with ten Nearctic species of Microgastrinae (Hymenoptera: Braconidae)
Source: PubMed Central journal article supplement (PMC4251541; doi:10.3897/bdj.2.e4153), 2014-10-29
Supplement: biodiversity_data_journal-2-e4153-s003.pdf [file biodiversity_data_journal-2-e4153-s003.pdf]

Figure 2. BOLD Image library of 134 specimens from 10 species

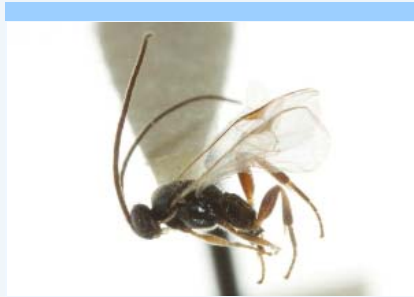

CNCHYM 00081 [Lateral]  
Apanteles carpatus

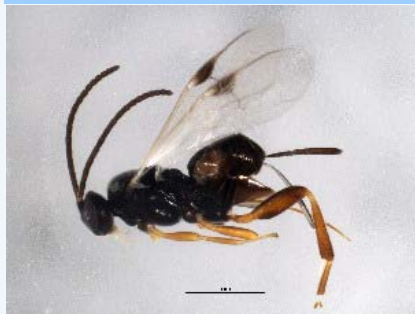

BIOUG01631-B09 [Lateral]  
Apanteles carpatus  
BIN URI: BOLD:AAC2372

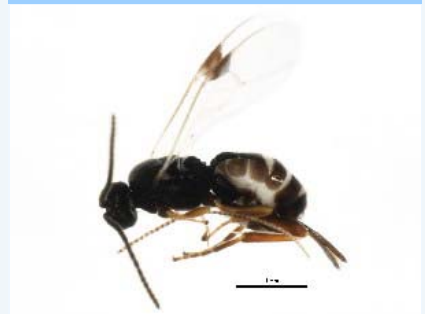

BIOUG01088-A03 [Lateral]  
Apanteles carpatus  
BIN URI: BOLD:AAC2372

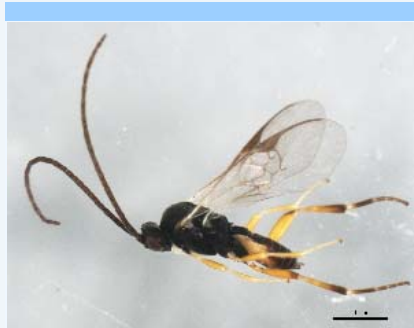

BIOUG00989-G12 [Lateral]  
Apanteles conanchetorum  
BIN URI: BOLD:AAC5506

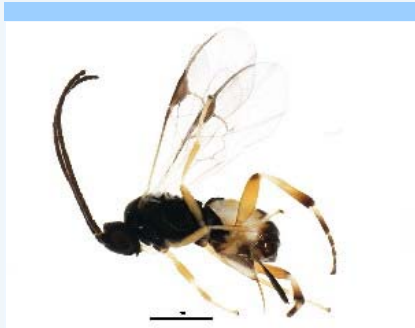

BIOUG01327-H05 [Lateral]  
Apanteles conanchetorum  
BIN URI: BOLD:AAC5506

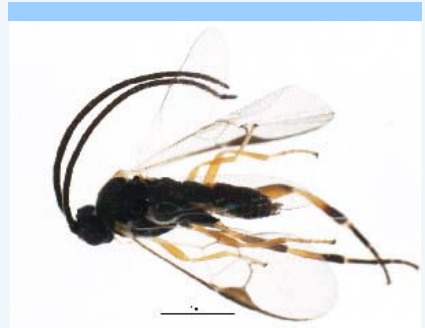

BIOUG01252-E11 [Lateral]  
Apanteles conanchetorum  
BIN URI: BOLD:AAC5506

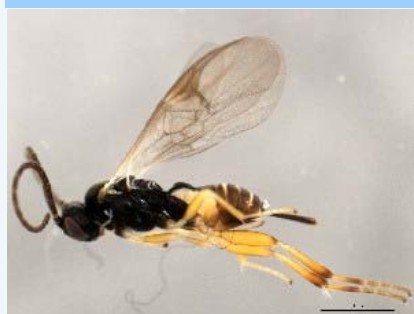

10BBCHY-2243 [Lateral]  
Apanteles conanchetorum  
BIN URI: BOLD:AAC5507

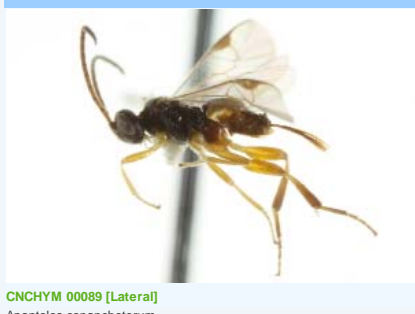

CNCHYM 00089 [Lateral]  
Apanteles conanchetorum

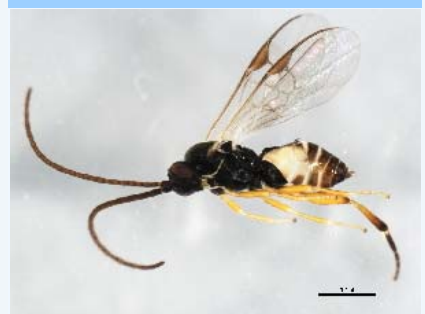

BIOUG00989-E10 [Lateral]  
Apanteles conanchetorum  
BIN URI: BOLD:AAC5506

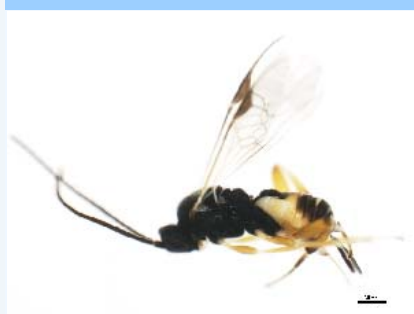

BIOUG01280-G04 [Lateral]  
Apanteles conanchetorum  
BIN URI: BOLD:AAC5506

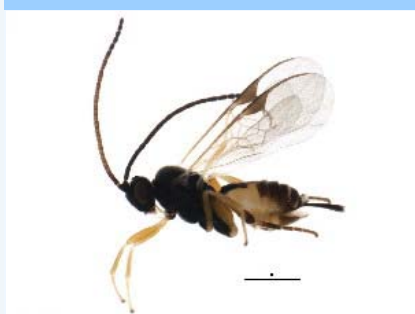

BIOUG00914-E08 [Lateral]  
Apanteles conanchetorum  
BIN URI: BOLD:AAC5506

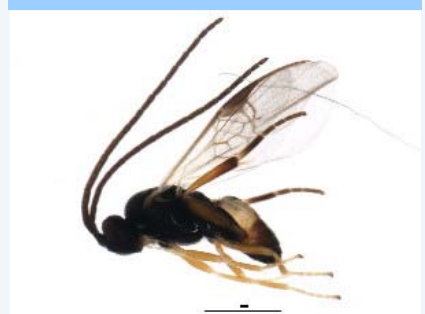

BIOUG00914-F06 [Lateral]  
Apanteles conanchetorum  
BIN URI: BOLD:AAC5506

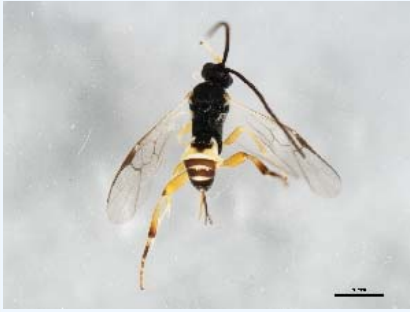

**BIOUG00989-E12 [Dorsal]**  
Apanteles conanchetorum  
BIN URI: BOLD:AAC5506

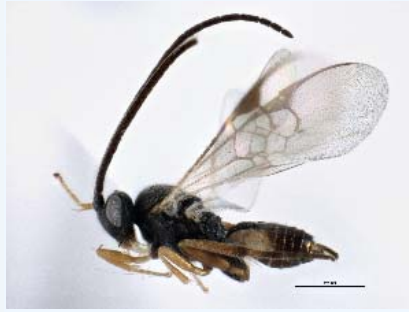

**BIOUG04245-B04 [Lateral]**  
Apanteles conanchetorum  
BIN URI: BOLD:AAC5507

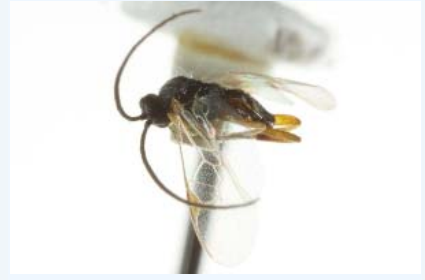

**CNCHYM 00093 [Lateral]**  
Apanteles conanchetorum

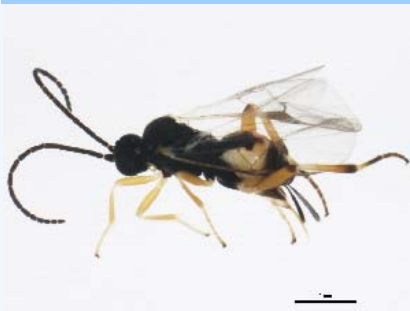

**BIOUG01330-D09 [Lateral]**  
Apanteles conanchetorum  
BIN URI: BOLD:AAC5506

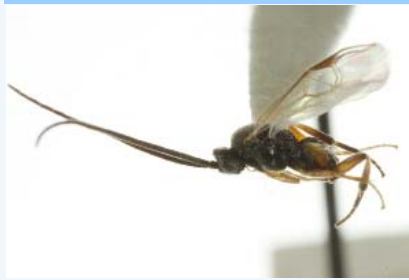

**CNCHYM 03970 [Lateral]**  
Apanteles conanchetorum

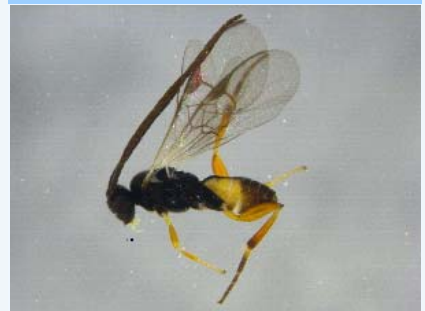

**BIOUG03486-E11 [Lateral]**  
Apanteles conanchetorum  
BIN URI: BOLD:AAC5507

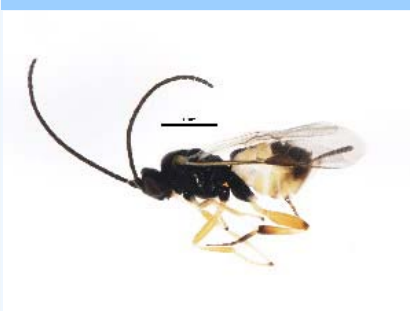

**BIOUG00861-G06 [Lateral]**  
Apanteles conanchetorum  
BIN URI: BOLD:AAC5506

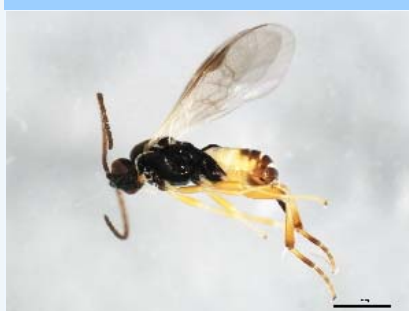

**BIOUG00989-E11 [Lateral]**  
Apanteles conanchetorum  
BIN URI: BOLD:AAC5506

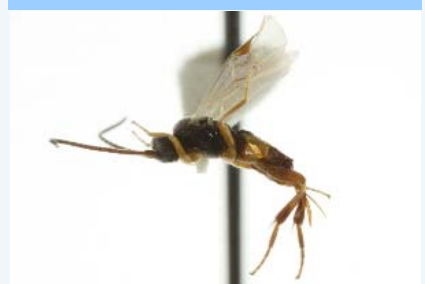

**CNCHYM 00090 [Lateral]**  
Apanteles conanchetorum

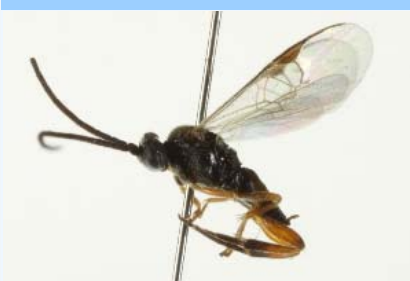

**PCPP10-0759 [Lateral]**  
Apanteles conanchetorum  
BIN URI: BOLD:AAC5506

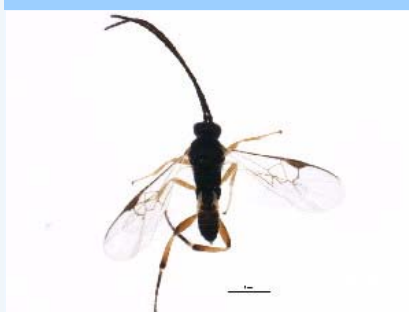

**BIOUG00914-F08 [Dorsal]**  
Apanteles conanchetorum  
BIN URI: BOLD:AAC5506

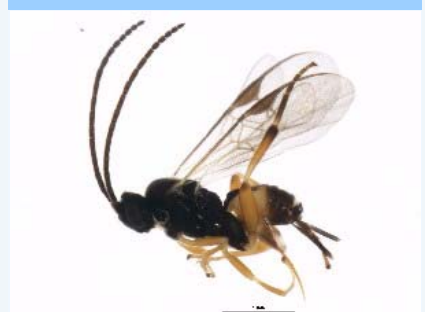

**BIOUG00991-B06 [Lateral]**  
Apanteles conanchetorum  
BIN URI: BOLD:AAC5506

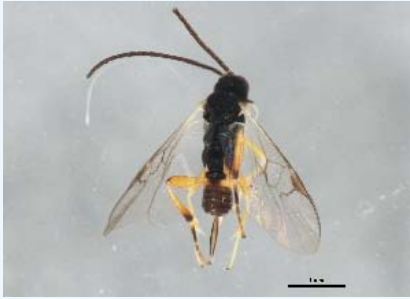

**BIOUG00989-A08 [Dorsal]**  
Apanteles conanchetorum  
BIN URI: BOLD:AAC5506

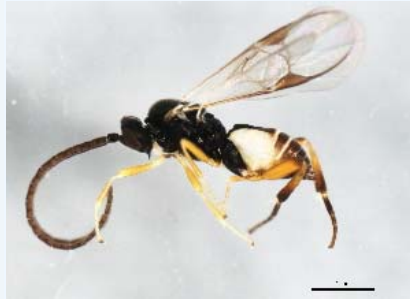

**BIOUG00989-E09 [Lateral]**  
Apanteles conanchetorum  
BIN URI: BOLD:AAC5506

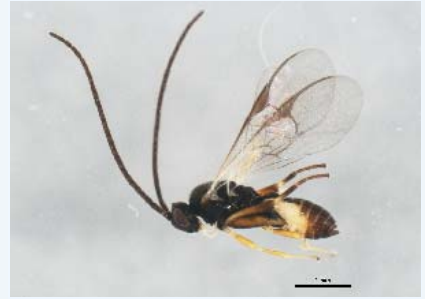

**BIOUG00989-A07 [Lateral]**  
Apanteles conanchetorum  
BIN URI: BOLD:AAC5506

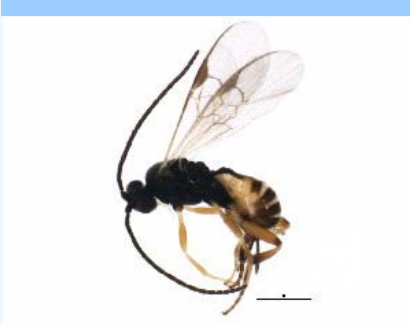

**BIOUG00914-E04 [Lateral]**  
Apanteles conanchetorum  
BIN URI: BOLD:AAC5506

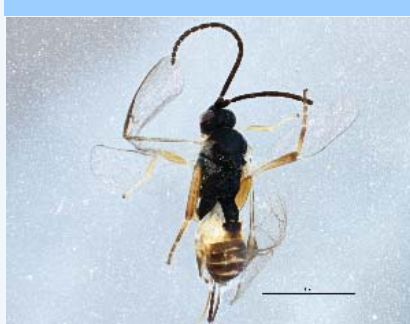

**BIOUG04245-A01 [Lateral]**  
Apanteles conanchetorum  
BIN URI: BOLD:AAC5507

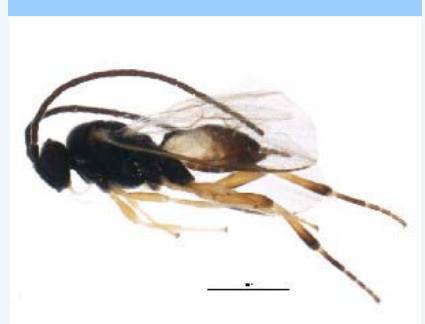

**BIOUG00914-G01 [Lateral]**  
Apanteles conanchetorum  
BIN URI: BOLD:AAC5506

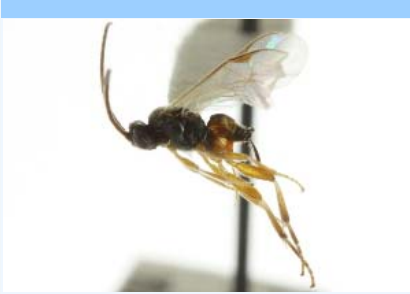

**CNCHYM 00088 [Lateral]**  
Apanteles conanchetorum

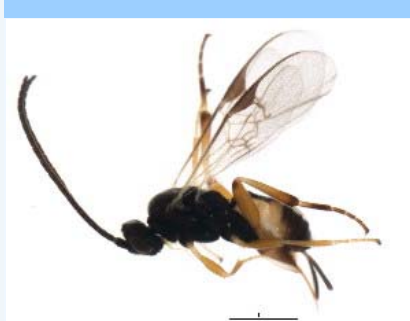

**BIOUG00914-E03 [Lateral]**  
Apanteles conanchetorum  
BIN URI: BOLD:AAC5506

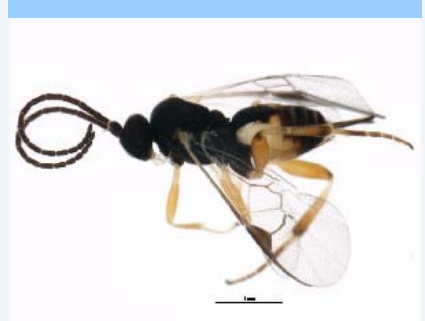

**BIOUG00991-A05 [Lateral]**  
Apanteles conanchetorum  
BIN URI: BOLD:AAC5506

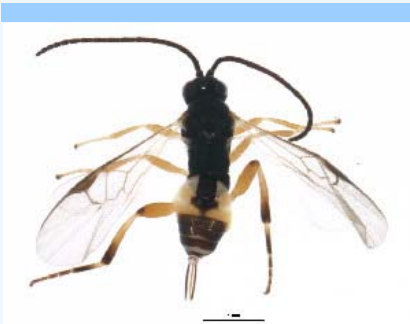

**BIOUG00914-E07 [Dorsal]**  
Apanteles conanchetorum  
BIN URI: BOLD:AAC5506

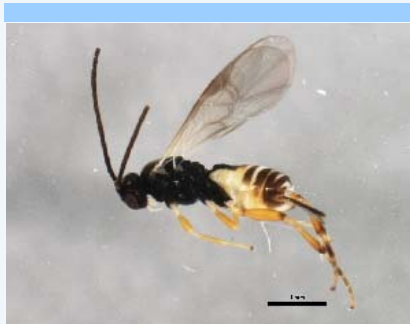

**BIOUG00988-A09 [Lateral]**  
Apanteles conanchetorum  
BIN URI: BOLD:AAC5506

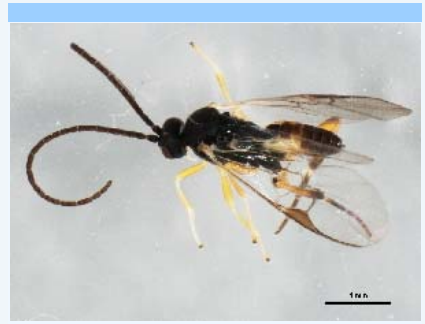

**BIOUG00989-F01 [Lateral]**  
Apanteles conanchetorum  
BIN URI: BOLD:AAC5506

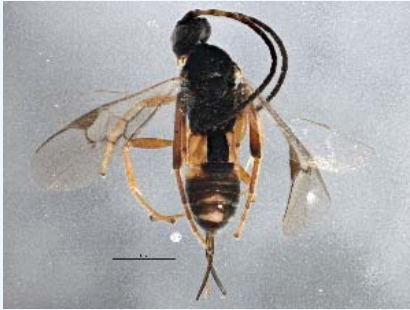

**BIOUG03220-F05 [Dorsal]**  
Apanteles ensiger  
BIN URI: BOLD:ACE6783

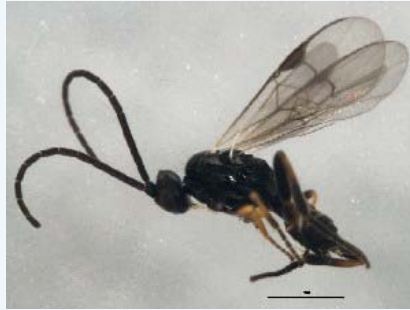

**10BBCHY-1304 [Lateral]**  
Apanteles ensiger  
BIN URI: BOLD:AAA3764

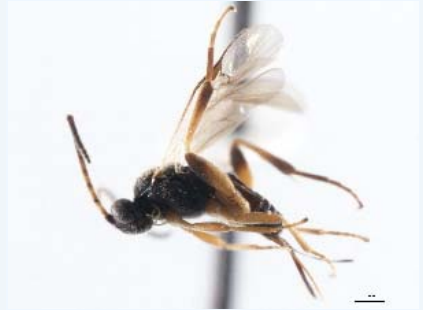

**CNCHYM 00107 [Lateral]**  
Apanteles ensiger

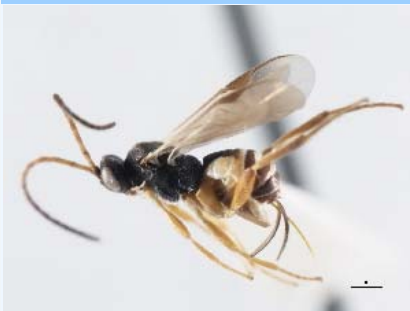

**CNCHYM 00105 [Lateral]**  
Apanteles ensiger

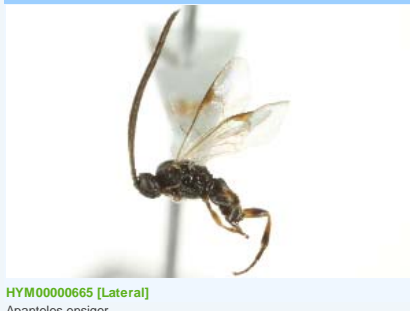

**HYM00000665 [Lateral]**  
Apanteles ensiger

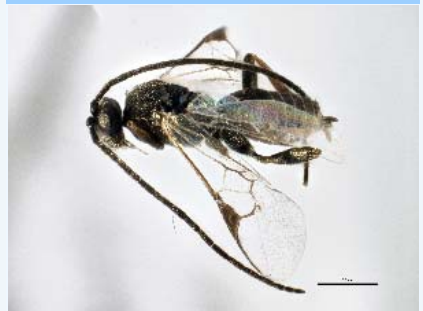

**BIOUG08647-G07 [Lateral]**  
Apanteles ensiger  
BIN URI: BOLD:ACE6783

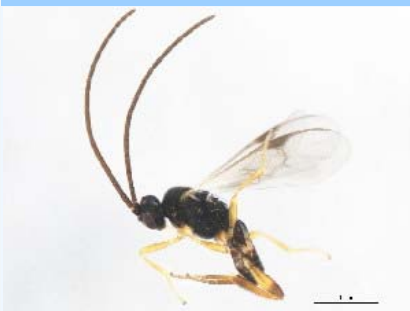

**10BBHYM-1225 [Lateral]**  
Apanteles ensiger  
BIN URI: BOLD:AAA3764

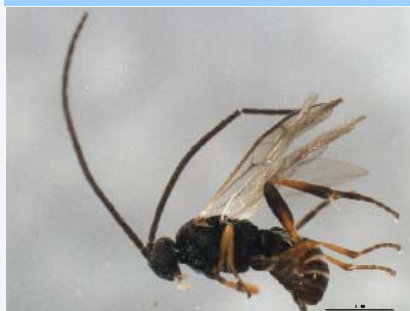

**BIOUG00726-B07 [Lateral]**  
Apanteles ensiger  
BIN URI: BOLD:AAA3764

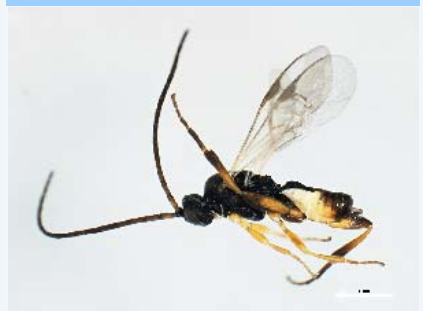

**BIOUG00761-A09 [Lateral]**  
Apanteles ensiger  
BIN URI: BOLD:AAA3764

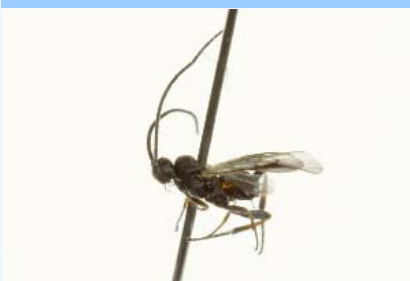

**TDWG-0167 [Lateral]**  
Apanteles ensiger  
BIN URI: BOLD:ACE6783

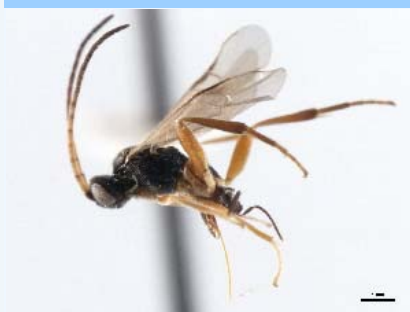

**CNCHYM 00106 [Lateral]**  
Apanteles ensiger

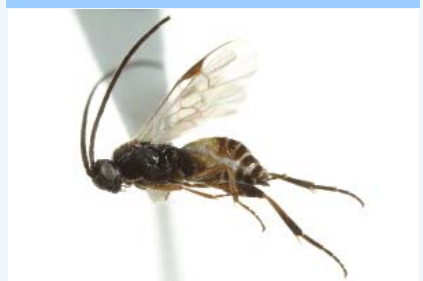

**07PROBE-22328 [Lateral]**  
Apanteles ensiger  
BIN URI: BOLD:AAA3764

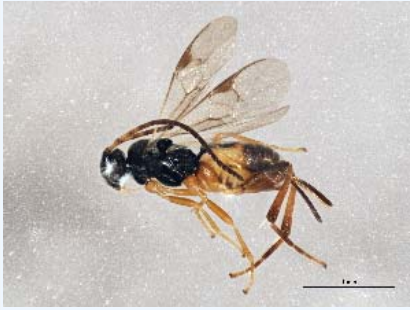

**BIOUG03220-A01 [Lateral]**  
Apanteles ensiger  
BIN URI: BOLD:AAA3764

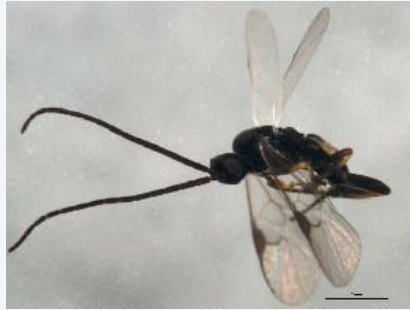

**10BBCHY-1305 [Lateral]**  
Apanteles ensiger  
BIN URI: BOLD:AAA3764

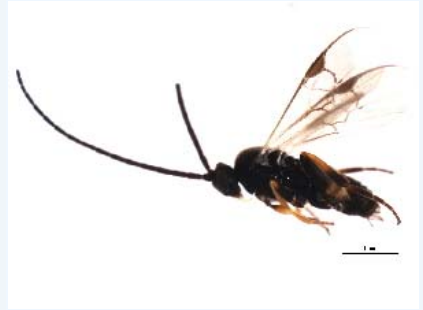

**09BBEHY-2030 [Lateral]**  
Apanteles ensiger  
BIN URI: BOLD:AAA3764

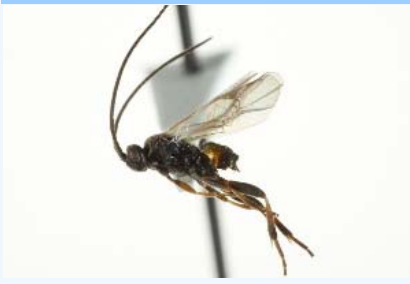

**07PROBE-23393 [Lateral]**  
Apanteles ensiger  
BIN URI: BOLD:AAA3764

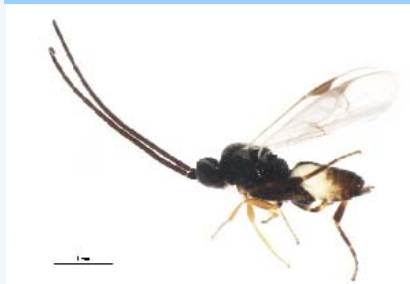

**PCPP10-0466 [Lateral]**  
Apanteles ensiger  
BIN URI: BOLD:AAA3764

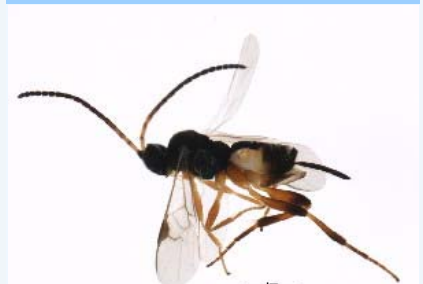

**BIOUG00991-B03 [Lateral]**  
Apanteles ensiger  
BIN URI: BOLD:AAA3764

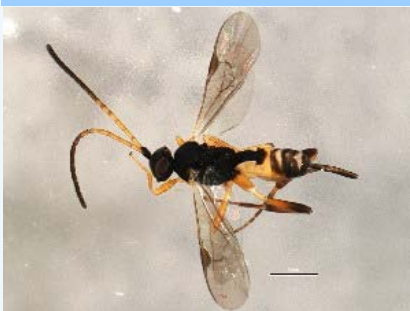

**ASGLE-0880 [Lateral]**  
Apanteles ensiger  
BIN URI: BOLD:AAA3764

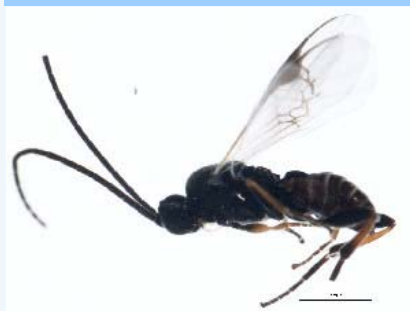

**TDWG-0384 [Lateral]**  
Apanteles ensiger  
BIN URI: BOLD:ACE6783

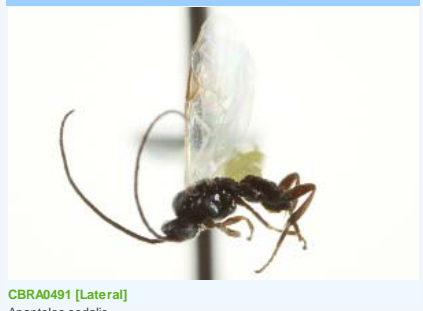

**CBRA0491 [Lateral]**  
Apanteles sodalis

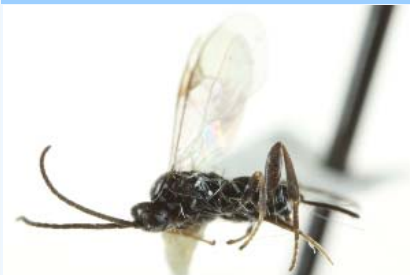

**CBRA0494 [Lateral]**  
Apanteles sodalis  
BIN URI: BOLD:AAM7223

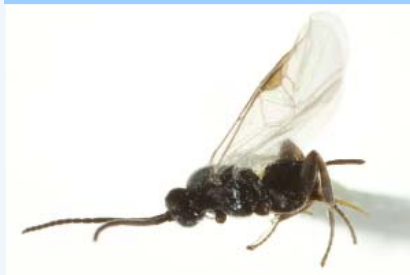

**CBRA0492 [Lateral]**  
Apanteles sodalis

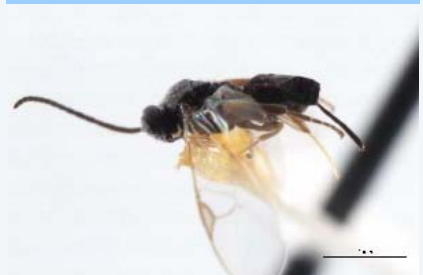

**CNCHYM 00215 [Lateral]**  
Apanteles sodalis  
BIN URI: BOLD:AAM7223

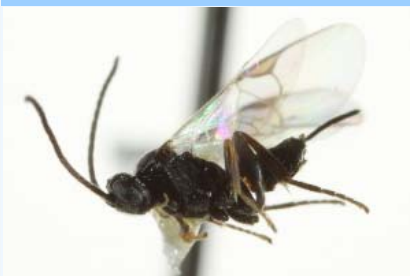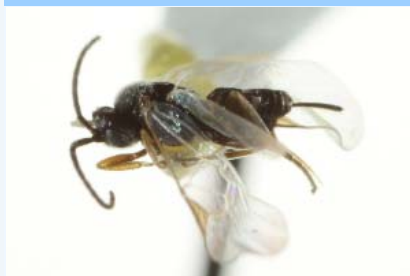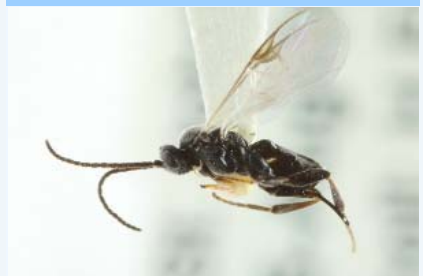

CBRA0493 [Lateral]  
*Apanteles sodalis*  
BIN URI: BOLD:AAM7223

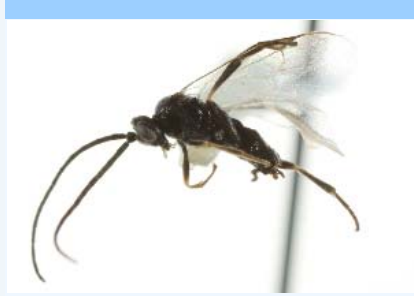

CBRA0490 [Lateral]  
*Apanteles sodalis*  
BIN URI: BOLD:AAH1859

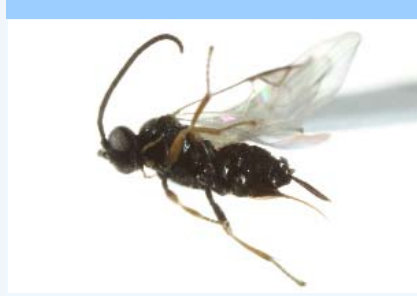

CBRA0495 [Lateral]  
*Apanteles sodalis*  
BIN URI: BOLD:AAM7223

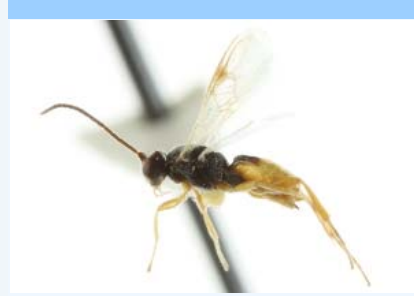

07PROBE-22321 [Lateral]  
*Apanteles xanthostigma*  
BIN URI: BOLD:AAB1922

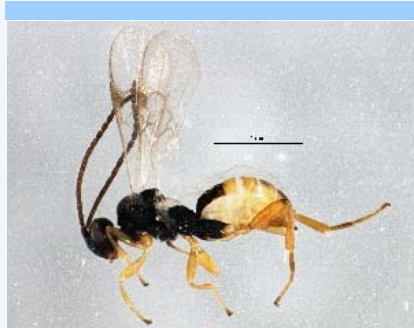

07PROBE-20921 [Lateral]  
*Apanteles xanthostigma*  
BIN URI: BOLD:AAB1922

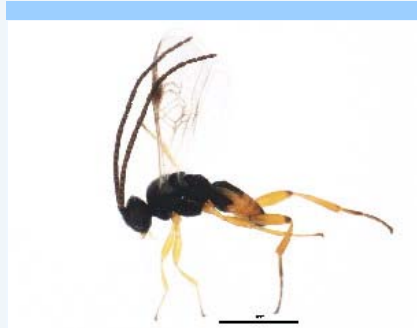

CNCHYM 00401 [Lateral]  
*Cotesia crambi*

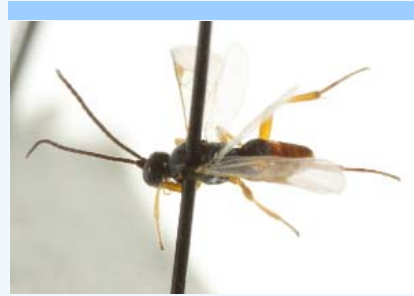

BIOUG03438-B06 [Lateral]  
*Cotesia crambi*  
BIN URI: BOLD:AAH1026

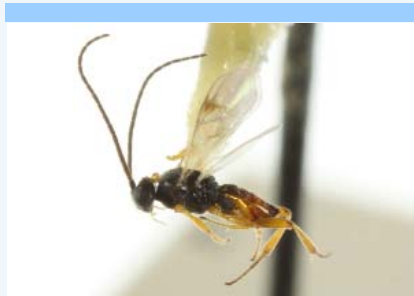

BIOUG01258-H06 [Lateral]  
*Cotesia crambi*  
BIN URI: BOLD:AAH1026

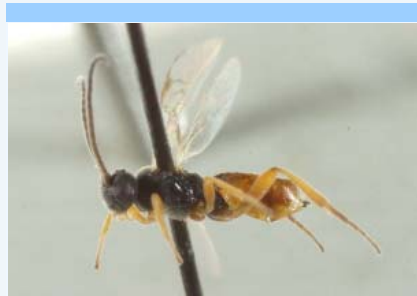

CNCHYM 00402 [Lateral]  
*Cotesia crambi*  
BIN URI: BOLD:AAH1026

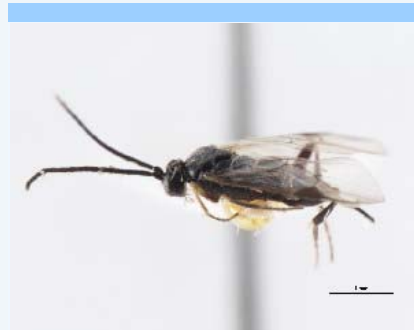

CNCHYM 00404 [Lateral]  
*Cotesia crambi*

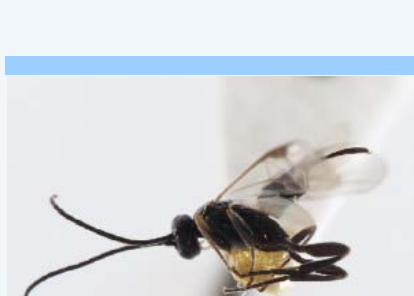

CNCHYM 00403 [Lateral]  
*Cotesia crambi*  
BIN URI: BOLD:AAH1026

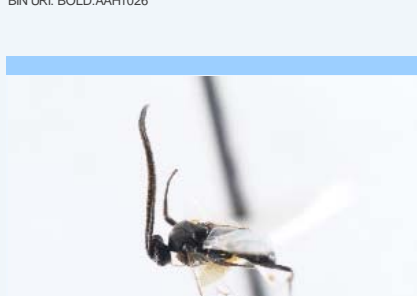

CNCHYM 01091 [Lateral]  
*Dolichogenidea longicauda*  
BIN URI: BOLD:AAA5826

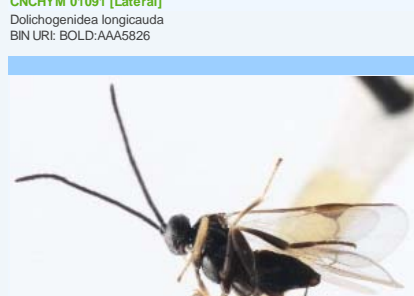

CNCHYM 01089 [Lateral]  
*Dolichogenidea longicauda*  
BIN URI: BOLD:AAA5826

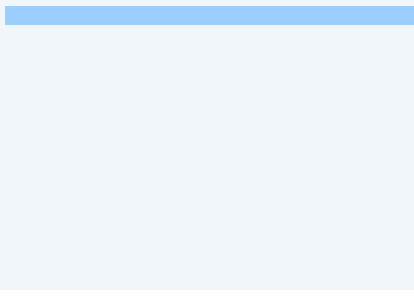

CNCHYM 01093 [Lateral]  
*Dolichogenidea longicauda*  
BIN URI: BOLD:AAA5826

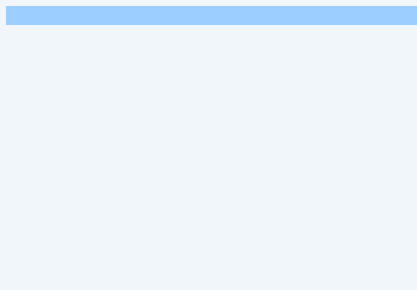

CNCHYM 00216 [Lateral]  
*Dolichogenidea longicauda*  
BIN URI: BOLD:AAA5826

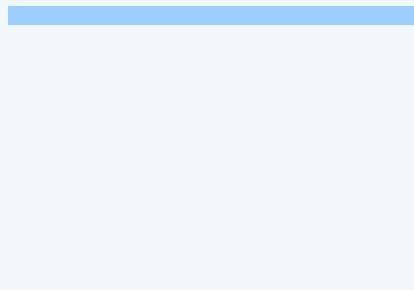

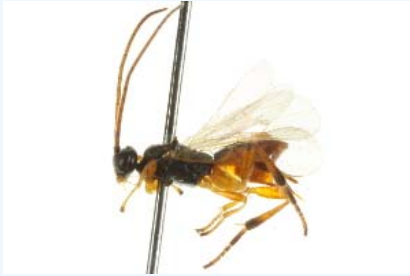

CNCHYM 01366 [Lateral]  
Hygroplitis melligaster

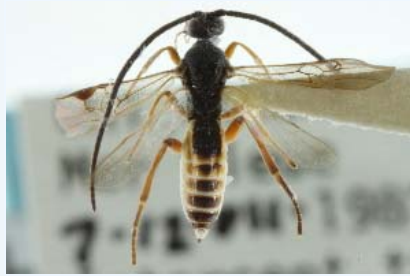

CNCHYM 01378 [Dorsal]  
Hygroplitis melligaster

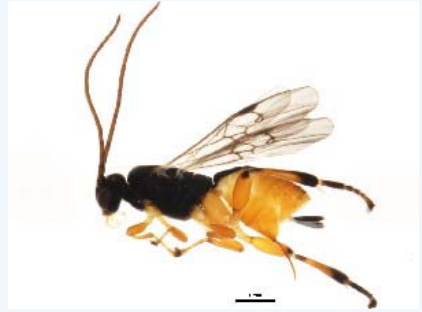

BIOUG01082-E12 [Lateral]  
Hygroplitis melligaster  
BIN URI: BOLD:AAC1797

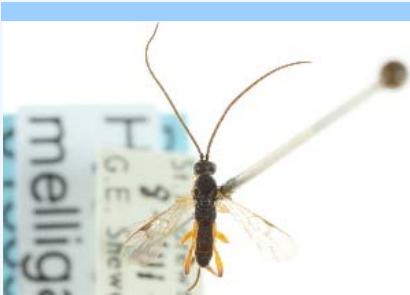

CNCHYM 01369 [Dorsal]  
Hygroplitis melligaster

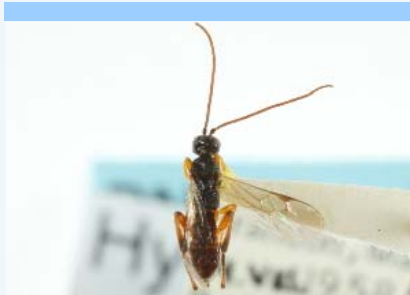

CNCHYM 01368 [Dorsal]  
Hygroplitis melligaster  
BIN URI: BOLD:AAC1797

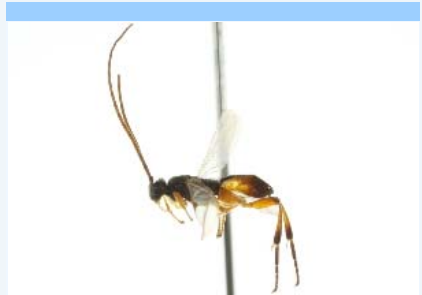

CNCHYM 01371 [Lateral]  
Hygroplitis melligaster

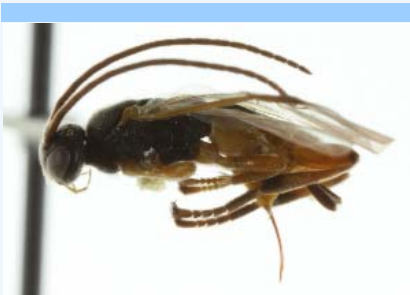

CNCHYM 01377 [Lateral]  
Hygroplitis melligaster

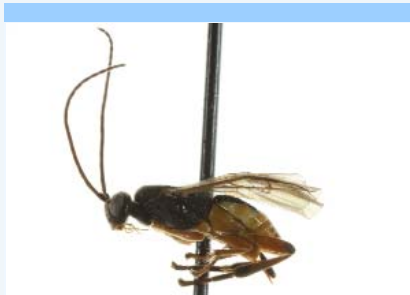

CNCHYM 01375 [Lateral]  
Hygroplitis melligaster

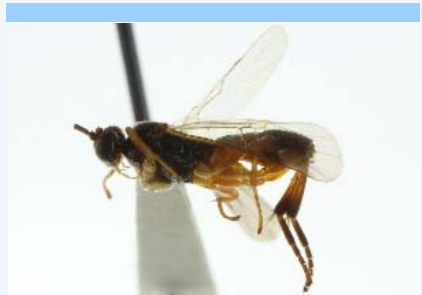

CNCHYM 01370 [Lateral]  
Hygroplitis melligaster

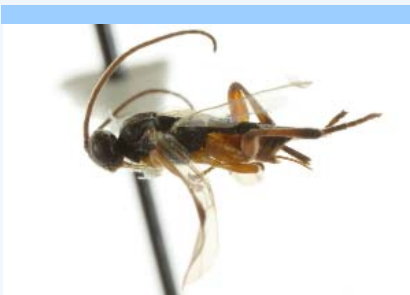

CNCHYM 01363 [Lateral]  
Hygroplitis melligaster  
BIN URI: BOLD:AAC1797

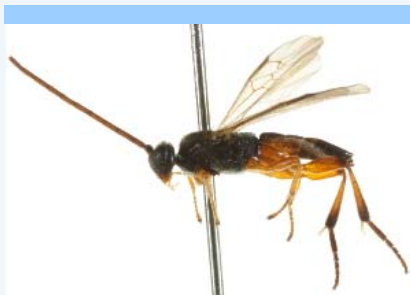

CNCHYM 01365 [Lateral]  
Hygroplitis melligaster

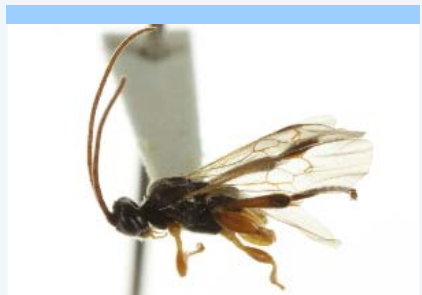

CNCHYM 01364 [Lateral]  
Hygroplitis melligaster

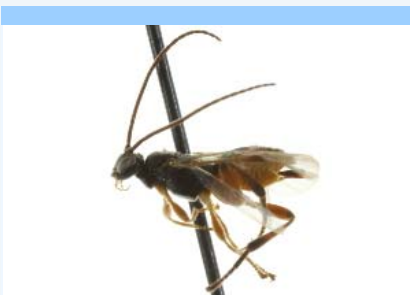

CNCHYM 01376 [Lateral]  
Hygroplitis melligaster

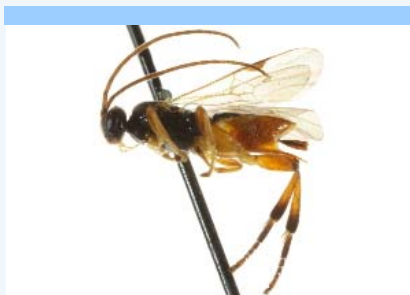

CNCHYM 01367 [Lateral]  
Hygroplitis melligaster  
BIN URI: BOLD:AAC1797

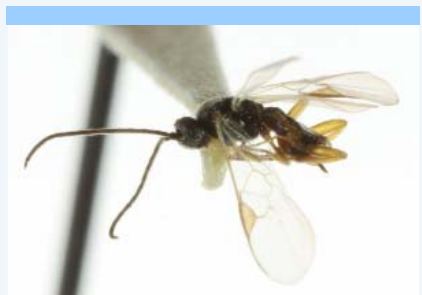

CNCHYM 03143 [Lateral]  
Pholetesor bedelliae

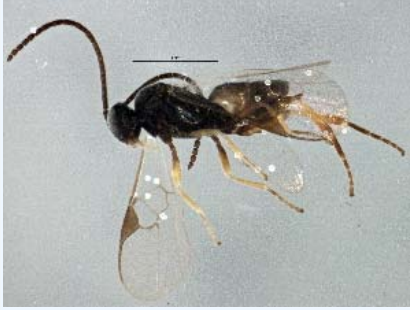

BIOUG03931-A10 [Lateral]  
Pholetesor bedelliae  
BIN URI: BOLD:AAA9172

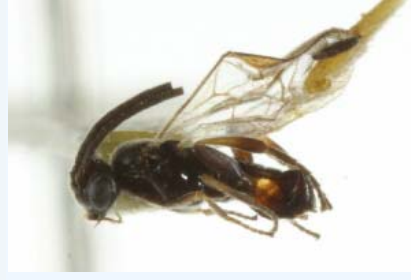

CNCHYM 03140 [Lateral]  
Pholetesor bedelliae

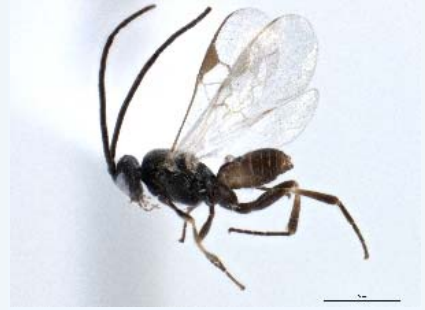

BIOUG04442-A12 [Lateral]  
Pholetesor bedelliae  
BIN URI: BOLD:AAA9172

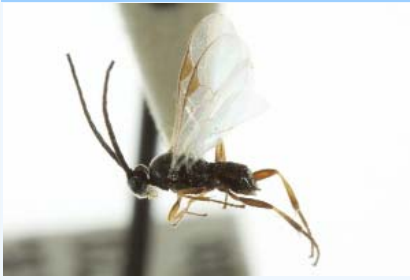

CNCHYM 03145 [Lateral]  
Pholetesor bedelliae

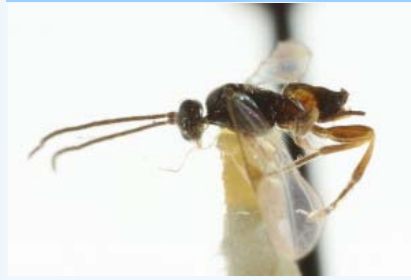

CNCHYM 03136 [Lateral]  
Pholetesor bedelliae

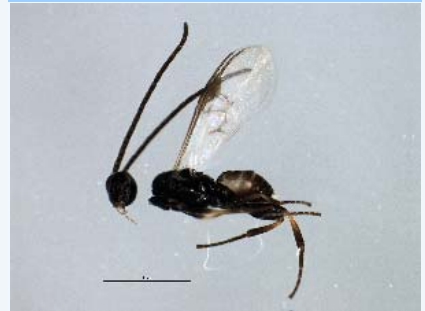

08BBHYM-1368 [Lateral]  
Pholetesor bedelliae  
BIN URI: BOLD:AAA9172

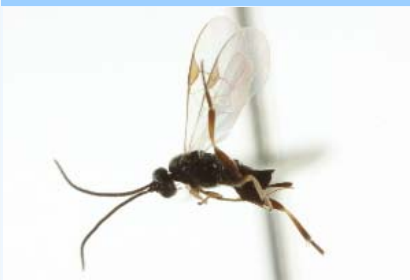

CNCHYM 03137 [Lateral]  
Pholetesor bedelliae

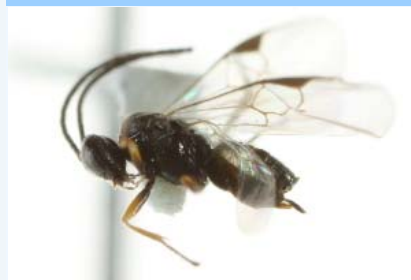

HYM00000819 [Lateral]  
Pholetesor bedelliae

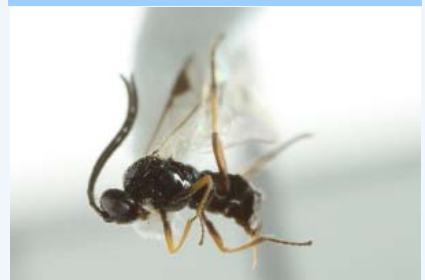

HYM00000920 [Lateral]  
Pholetesor bedelliae  
BIN URI: BOLD:AAA9172

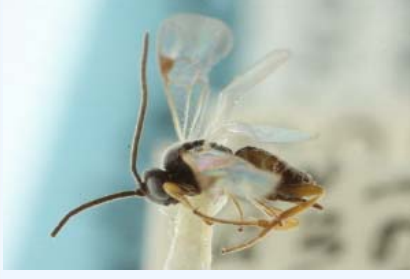

CNCHYM 03144 [Lateral]  
Pholetesor bedelliae

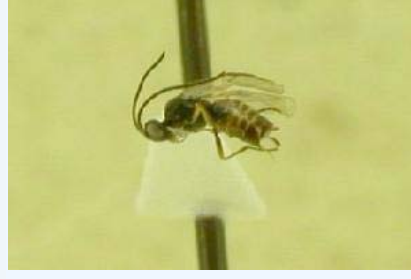

HYM00000331 [Lateral]  
Pholetesor bedelliae  
BIN URI: BOLD:AAA9172

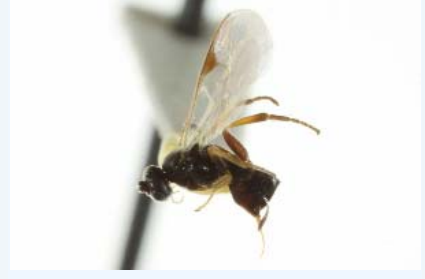

CNCHYM 03142 [Lateral]  
Pholetesor bedelliae

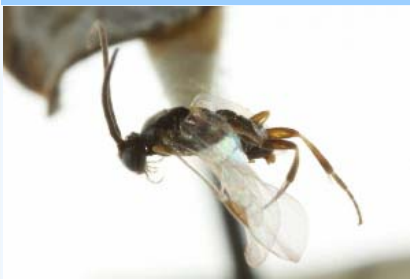

CNCHYM 03138 [Lateral]  
Pholetesor bedelliae

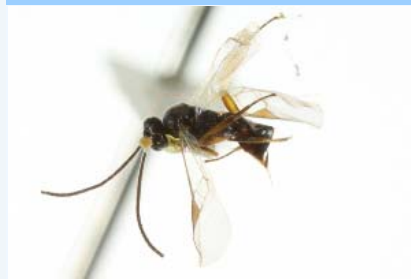

CNCHYM 03141 [Lateral]  
Pholetesor bedelliae

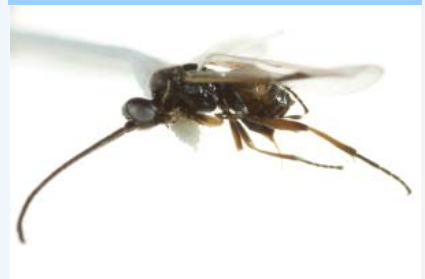

HYM00000818 [Lateral]  
Pholetesor bedelliae



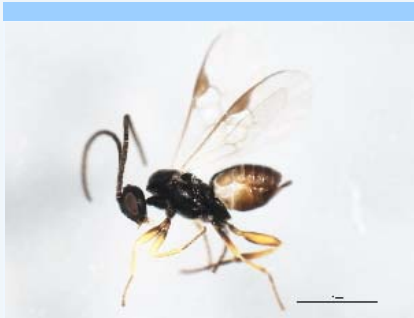

**BIOUG00989-E07 [Lateral]**  
Pholetesor bedelliae  
BIN URI: BOLD:AAA9172

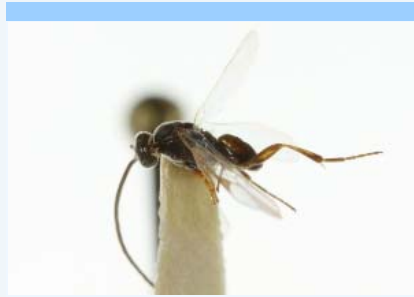

**CNCHYM 03139 [Lateral]**  
Pholetesor bedelliae

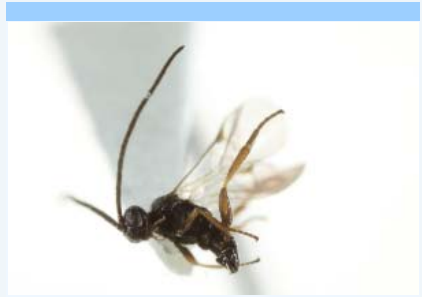

**07PROBE-20808 [Lateral]**  
Pholetesor viminetorum  
BIN URI: BOLD:AAA5660

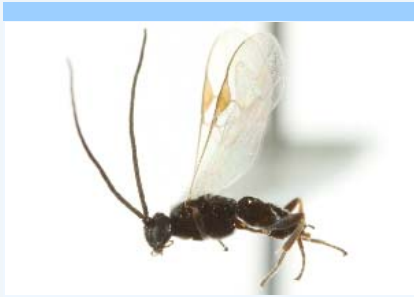

**HYM00000810 [Lateral]**  
Pholetesor viminetorum

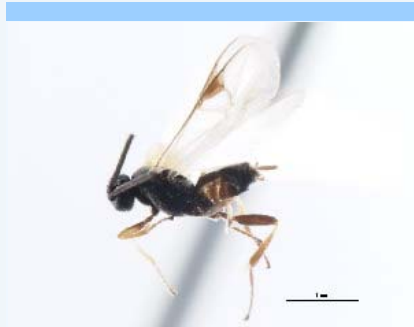

**CNCHYM 03216 [Lateral]**  
Pholetesor viminetorum

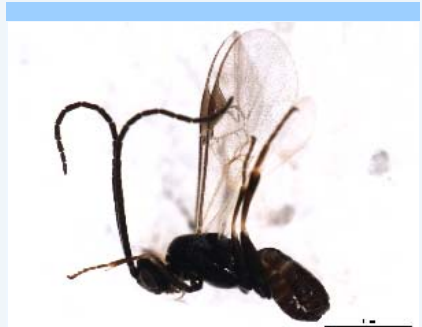

**09PROBE-A0342 [Lateral]**  
Pholetesor viminetorum  
BIN URI: BOLD:AAA5660

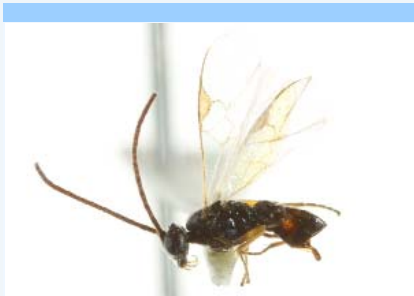

**HYM00000800 [Lateral]**  
Pholetesor viminetorum

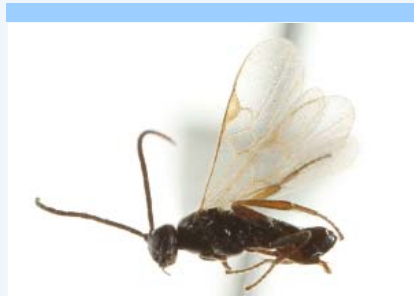

**HYM00000801 [Lateral]**  
Pholetesor viminetorum

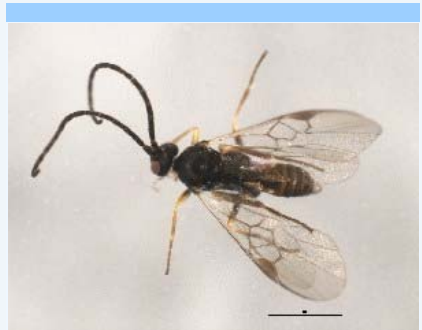

**10BBCHY-2887 [Dorsal]**  
Pholetesor viminetorum  
BIN URI: BOLD:AAA5660

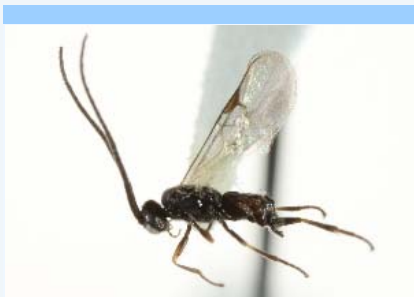

**07PROBE-23399 [Lateral]**  
Pholetesor viminetorum  
BIN URI: BOLD:AAA5660

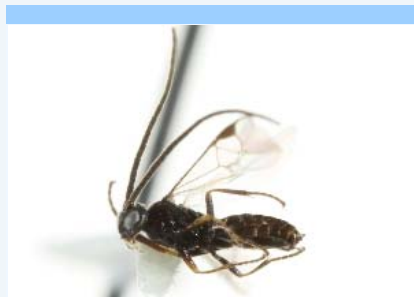

**07PROBE-22423 [Lateral]**  
Pholetesor viminetorum  
BIN URI: BOLD:AAA5660

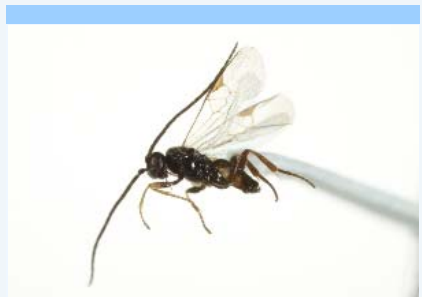

**07PROBE-20789 [Lateral]**  
Pholetesor viminetorum  
BIN URI: BOLD:AAA5660

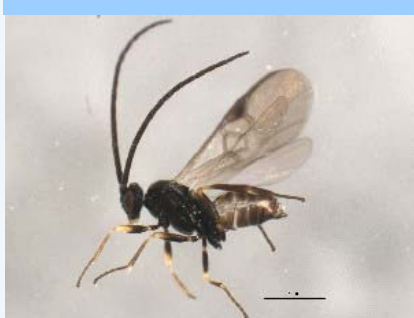

**HYM00000921 [Lateral]**  
Pholetesor viminetorum

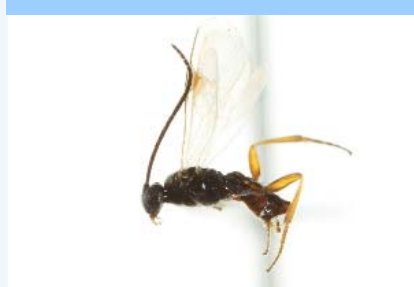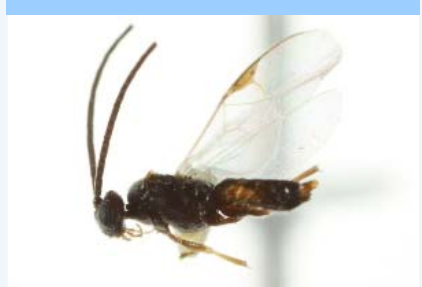

**HYM00000816 [Lateral]**  
Pholetesor viminetorum

10BBCHY-2879 [Lateral]

Pholetesor viminetorum  
BIN URI: BOLD:AAA5660

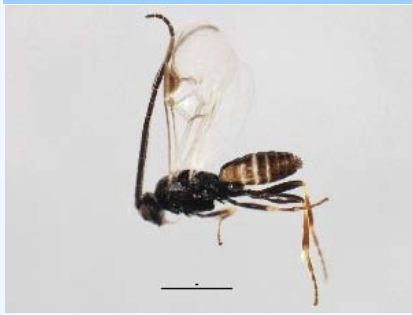

07PROBE-23413 [Lateral]

Pholetesor viminetorum  
BIN URI: BOLD:AAA5660

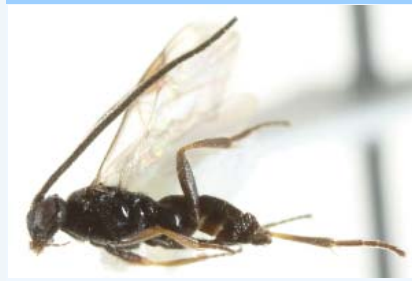

10PROBE-29276 [Lateral]

Pholetesor viminetorum  
BIN URI: BOLD:AAA5660

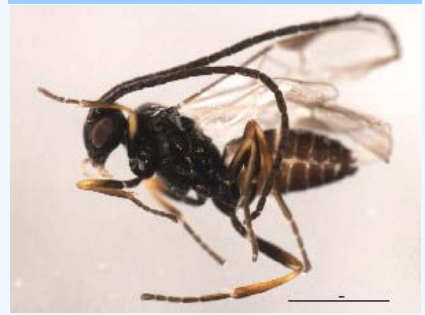

09BBEHY-1128 [Lateral]

Pholetesor viminetorum  
BIN URI: BOLD:AAA5660

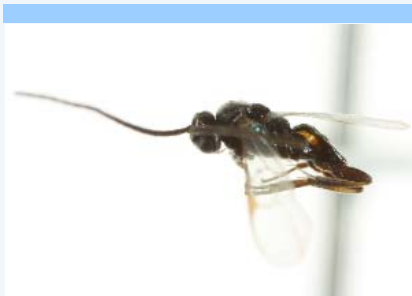

CNCHYM 03217 [Lateral]

Pholetesor viminetorum

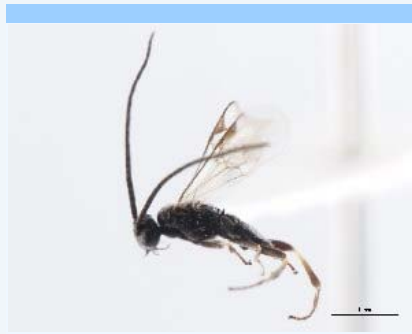

HYM00000792 [Lateral]

Pholetesor viminetorum

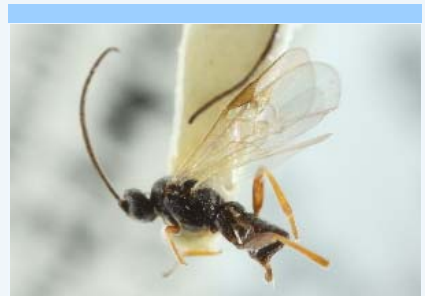

HYM00000812 [Lateral]

Pholetesor viminetorum

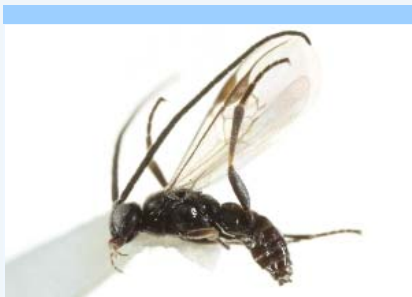

07PROBE-22417 [Lateral]

Pholetesor viminetorum  
BIN URI: BOLD:AAA5660

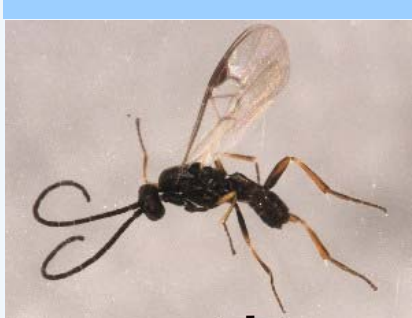

07PROBE-20818 [Lateral]

Pholetesor viminetorum  
BIN URI: BOLD:AAA5660

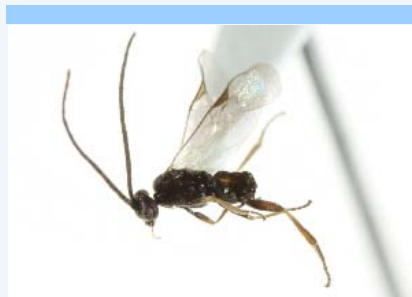

07PROBE-20806 [Lateral]

Pholetesor viminetorum  
BIN URI: BOLD:AAA5660

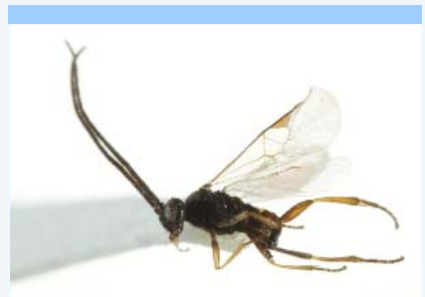

10PROBE-28643 [Lateral]

Pholetesor viminetorum  
BIN URI: BOLD:AAA5660



08BBHYM-1493 [Dorsal]

Pholetesor viminetorum  
BIN URI: BOLD:AAA5660

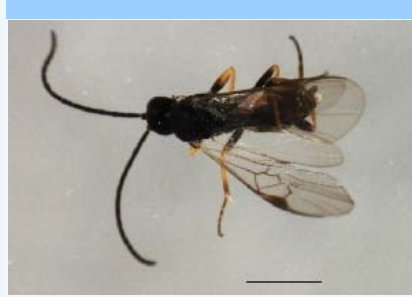

HYM00000809 [Lateral]

Pholetesor viminetorum

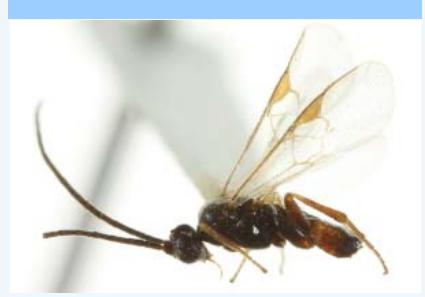

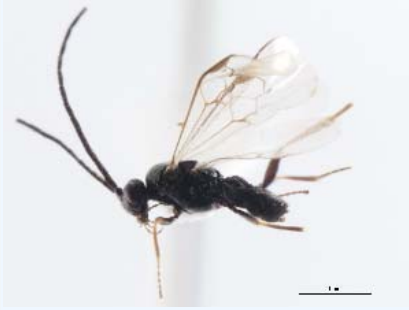

CNCHYM 03218 [Lateral]  
Pholetesor viminetorum

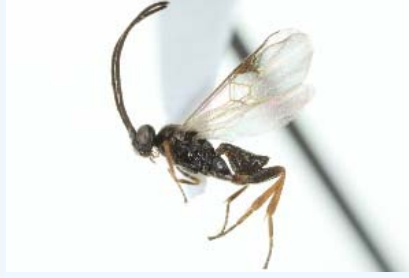

07PROBE-24572 [Lateral]  
Pholetesor viminetorum  
BIN URI: BOLD:AAA5660

Copyright © 2014 BOLD Systems. All rights reserved.
