# Supplementary material for: Streamlining the use of BOLD specimen data to record species distributions: a case study with ten Nearctic species of Microgastrinae (Hymenoptera: Braconidae)
Source: PubMed Central journal article supplement (PMC4251541; doi:10.3897/bdj.2.e4153), 2014-10-29
Supplement: biodiversity_data_journal-2-e4153-s005.pdf [file biodiversity_data_journal-2-e4153-s005.pdf]

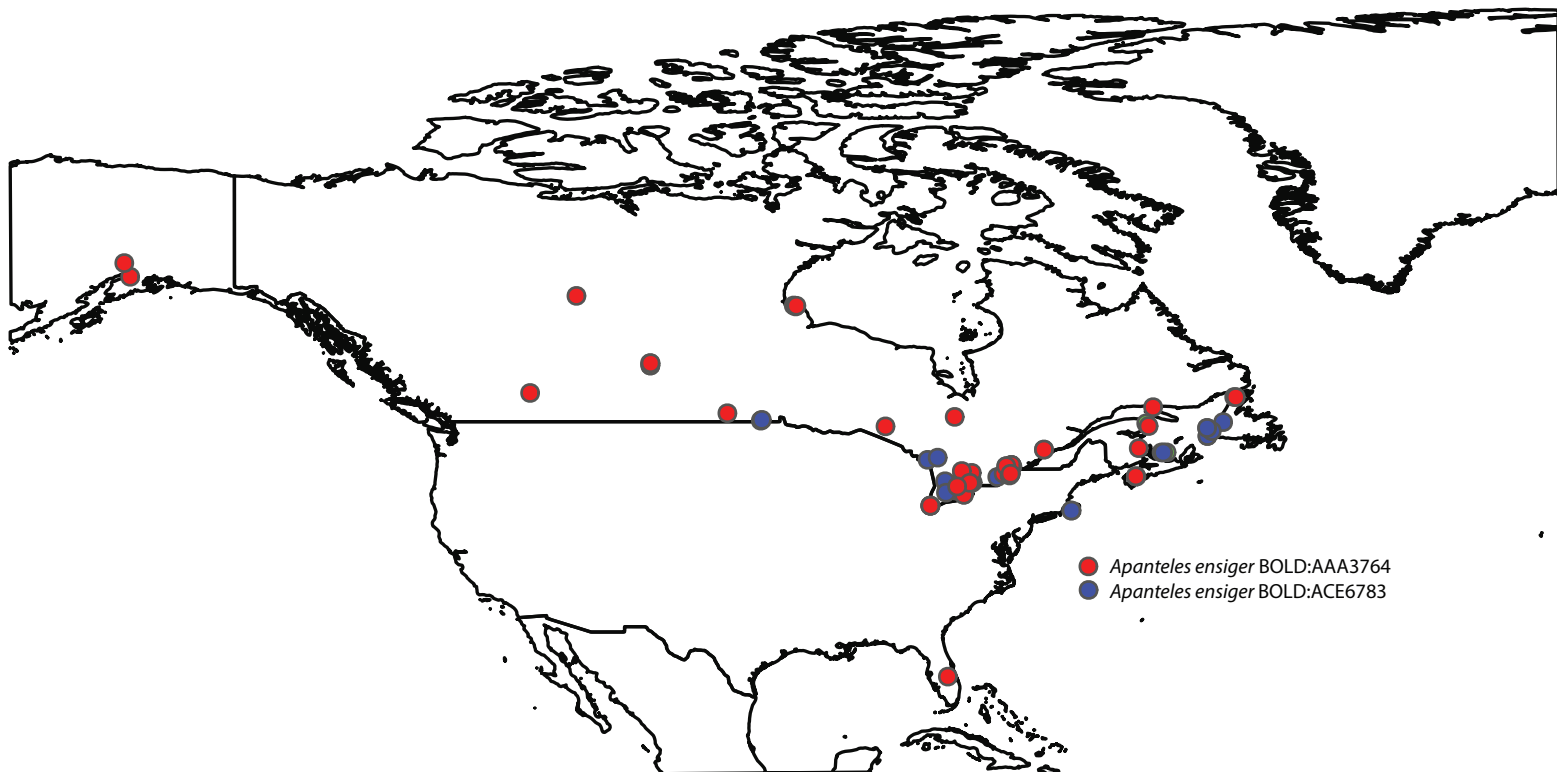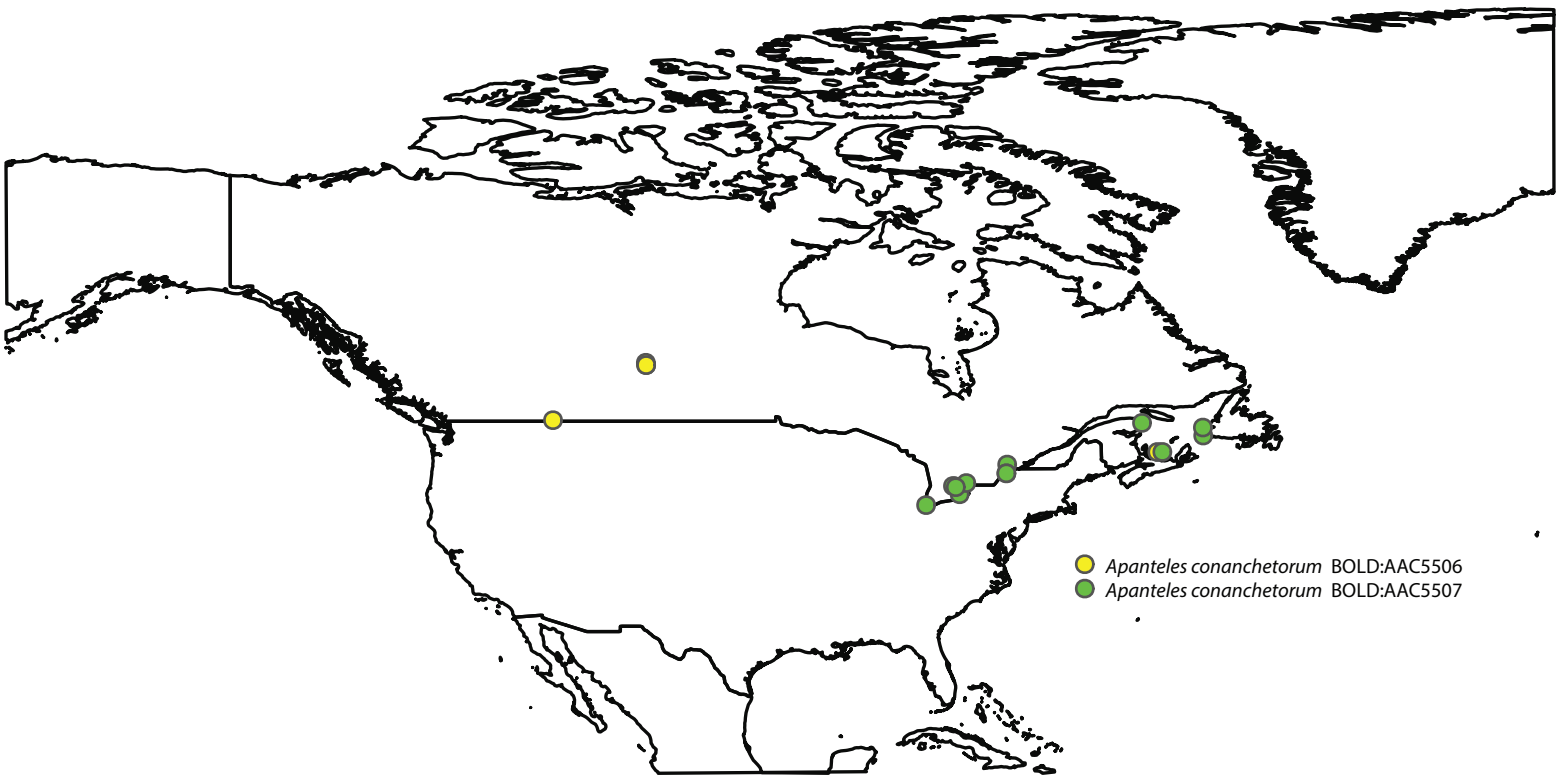

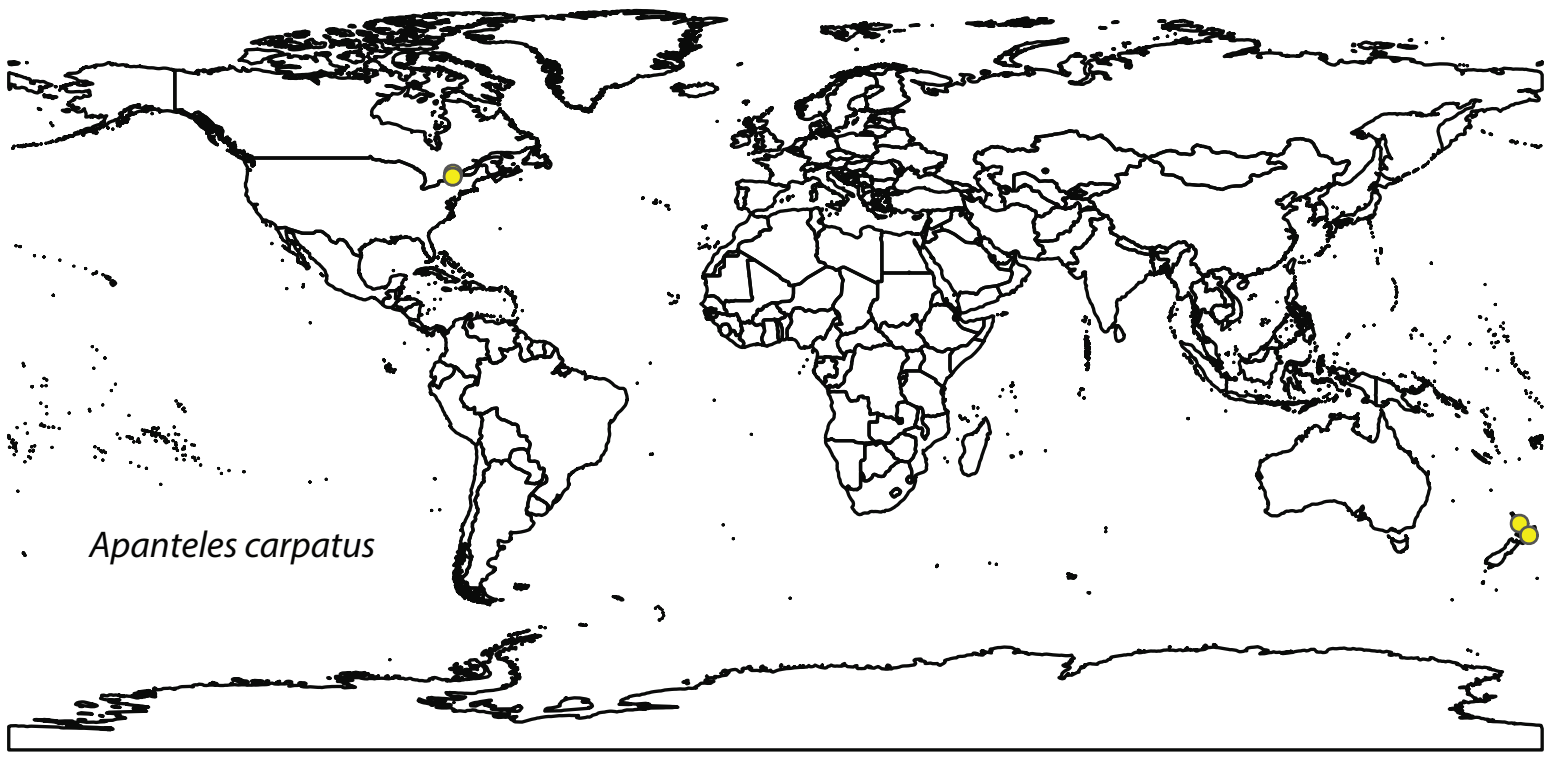

*Apanteles carpatus*

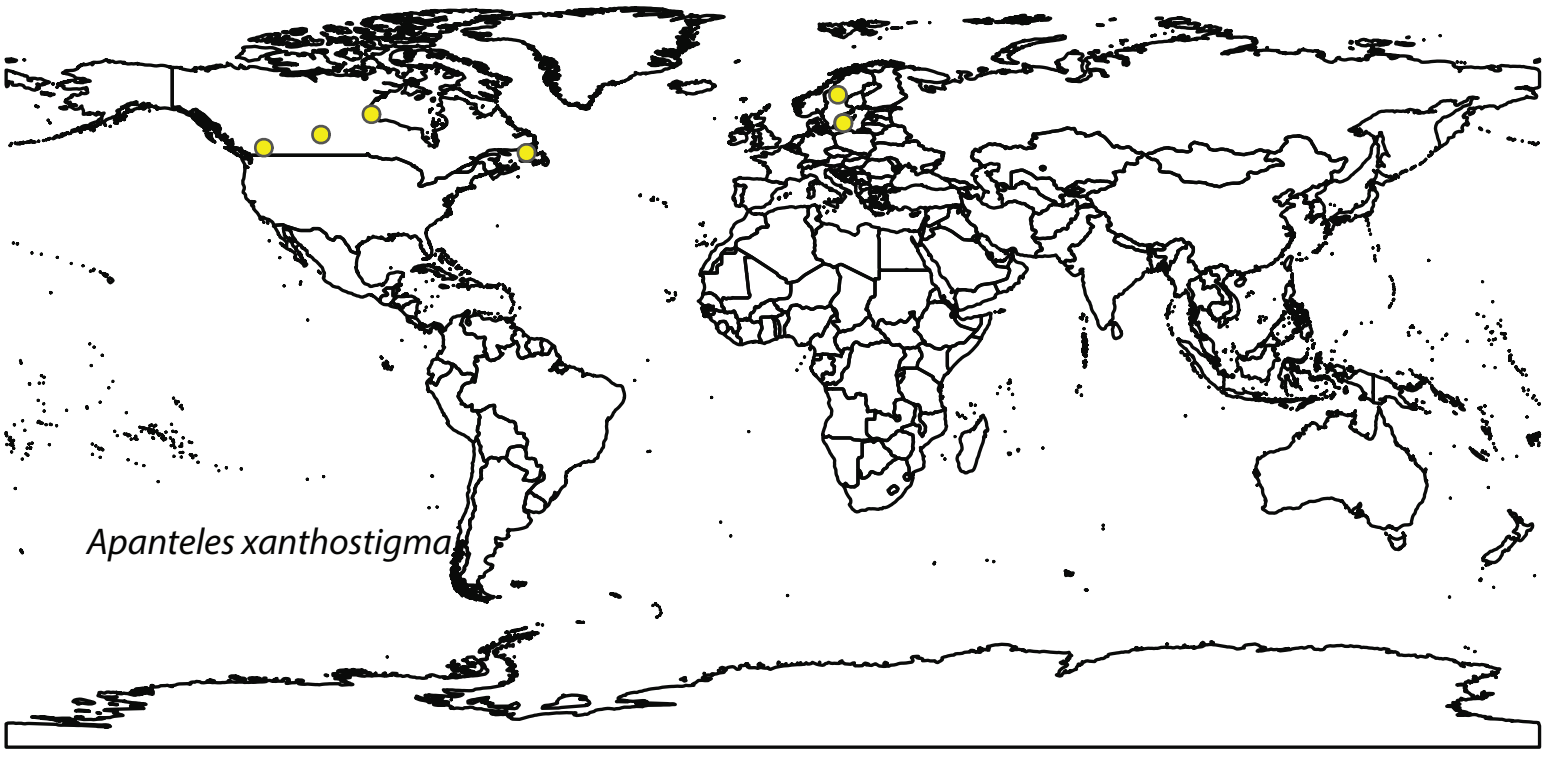

*Apanteles xanthostigma*

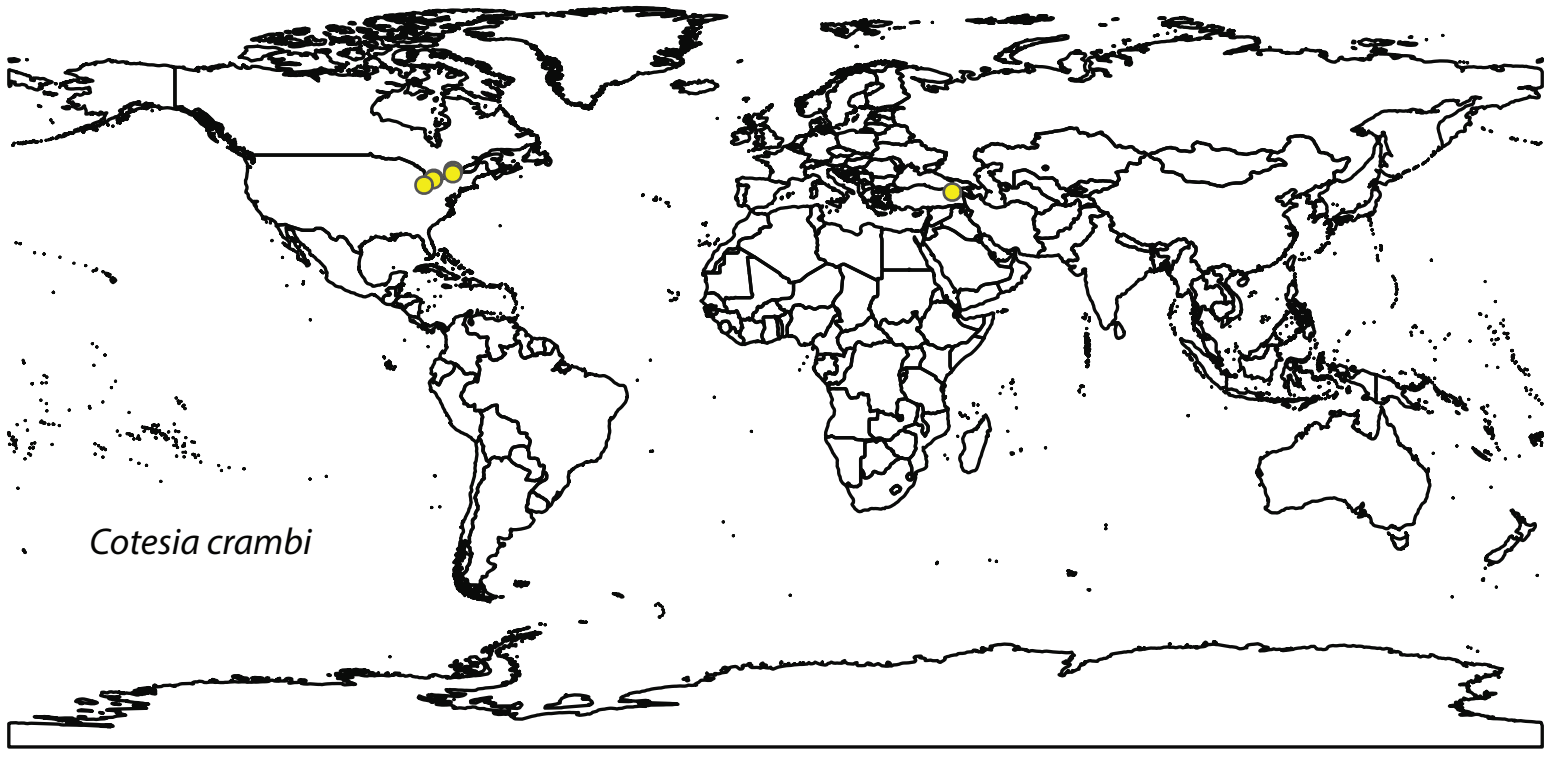

*Cotesia crambi*

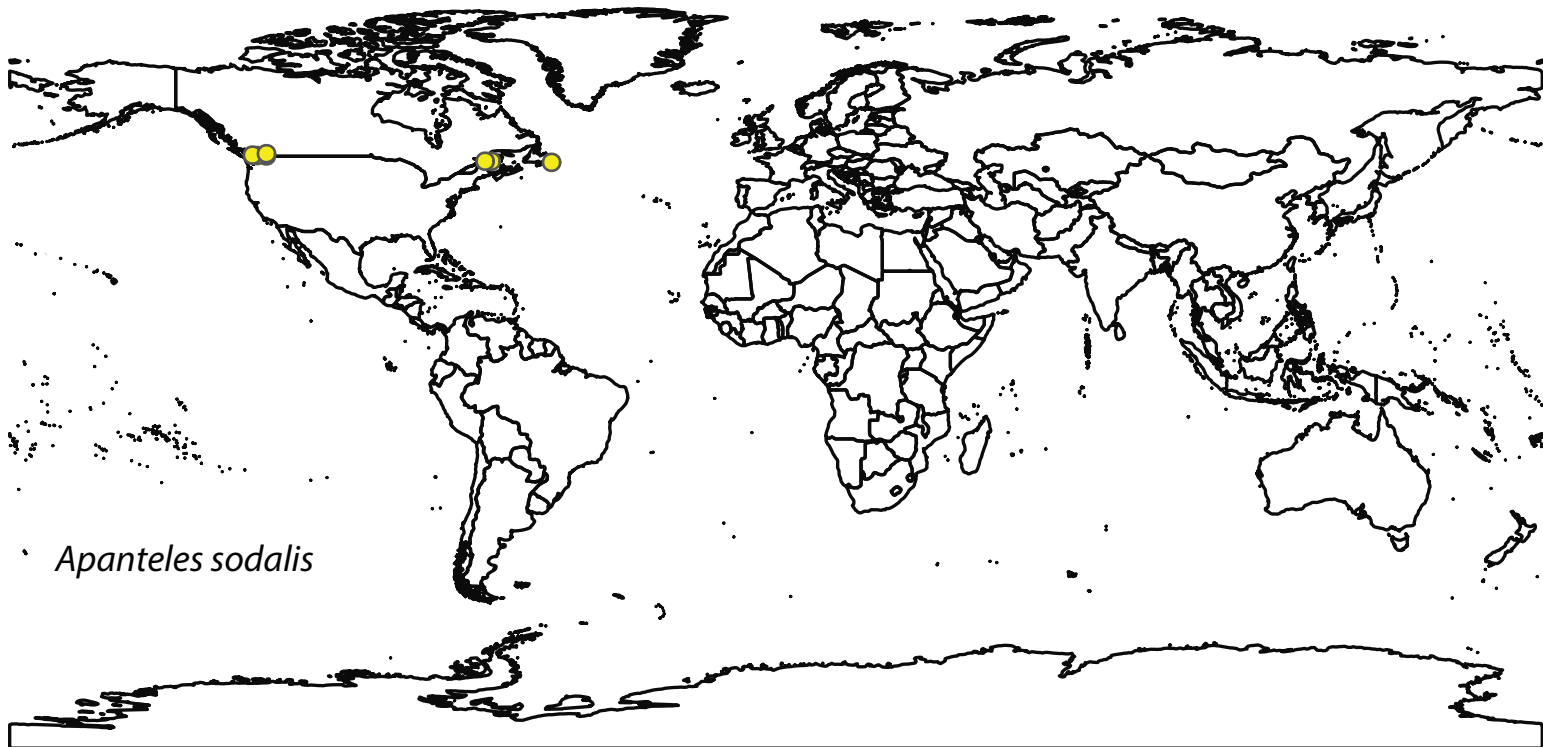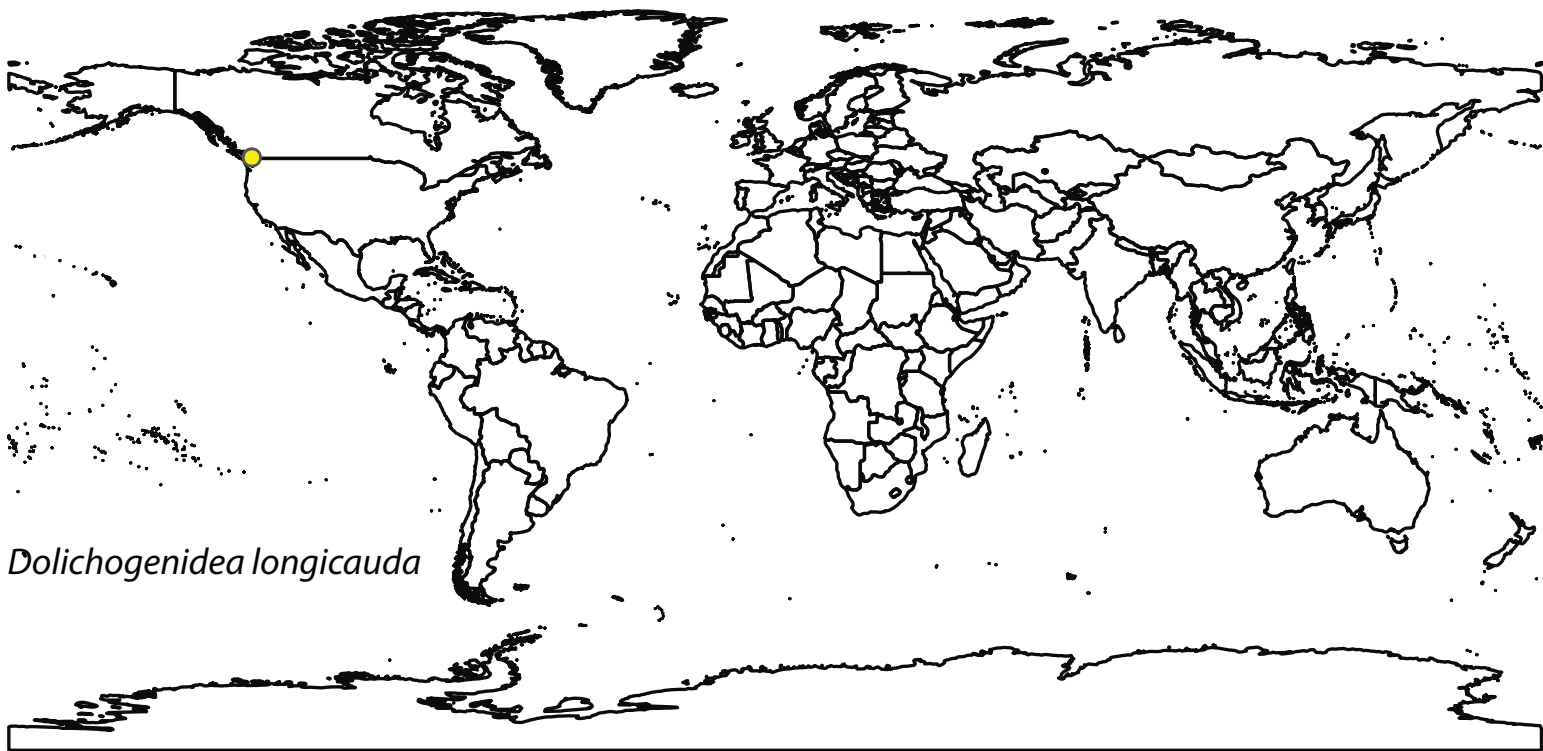

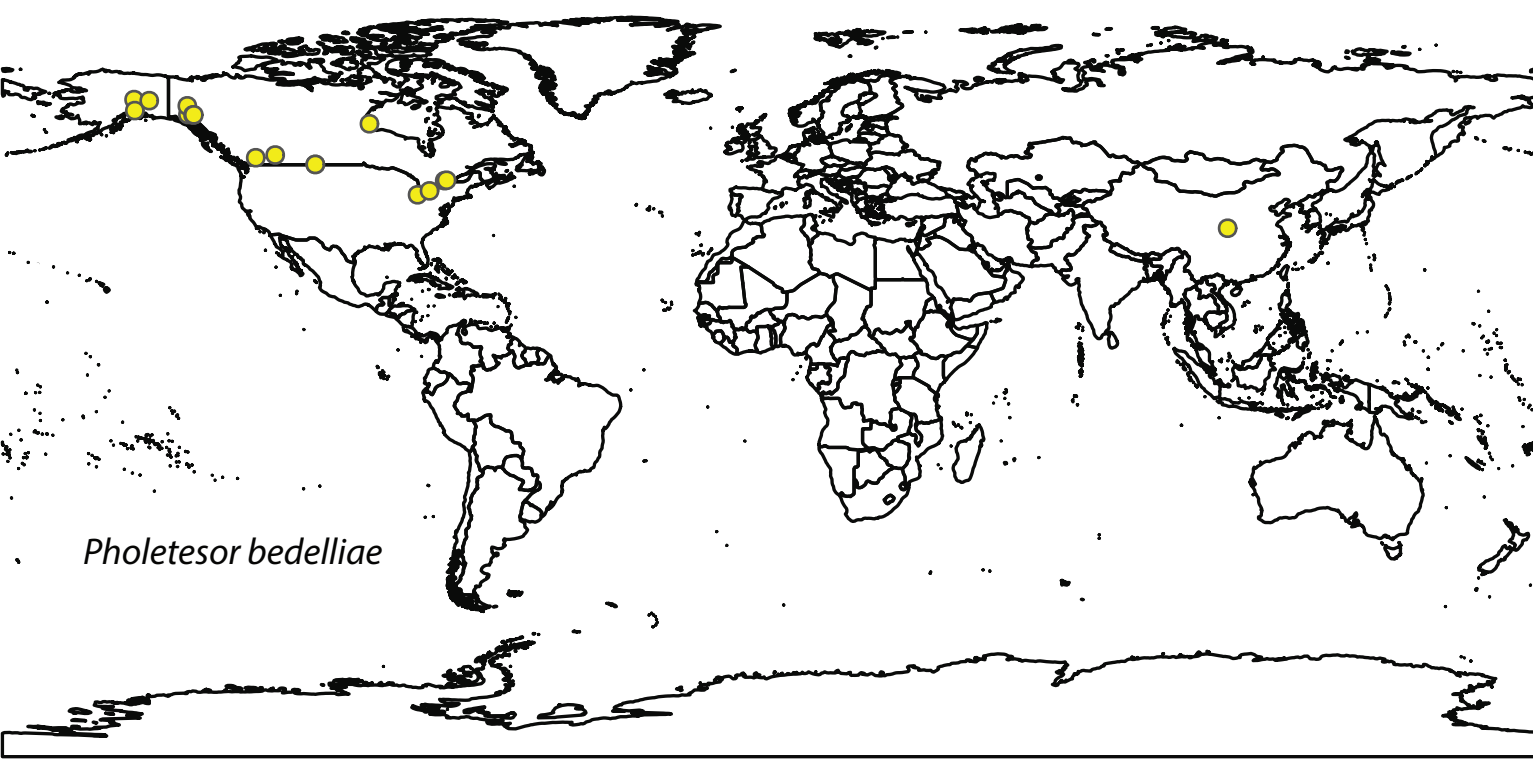

*Pholetesor bedelliae*

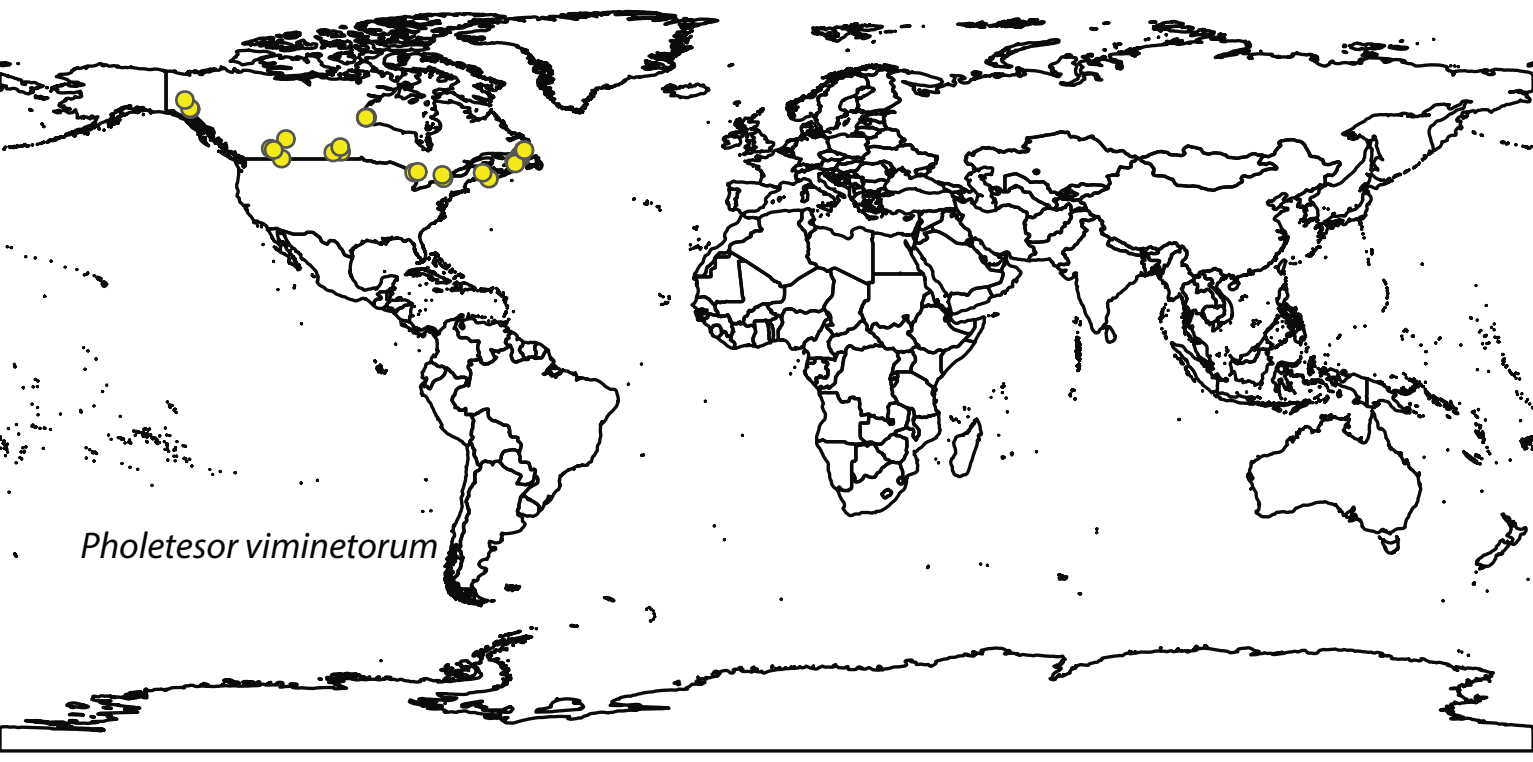

*Pholetesor viminetorum*

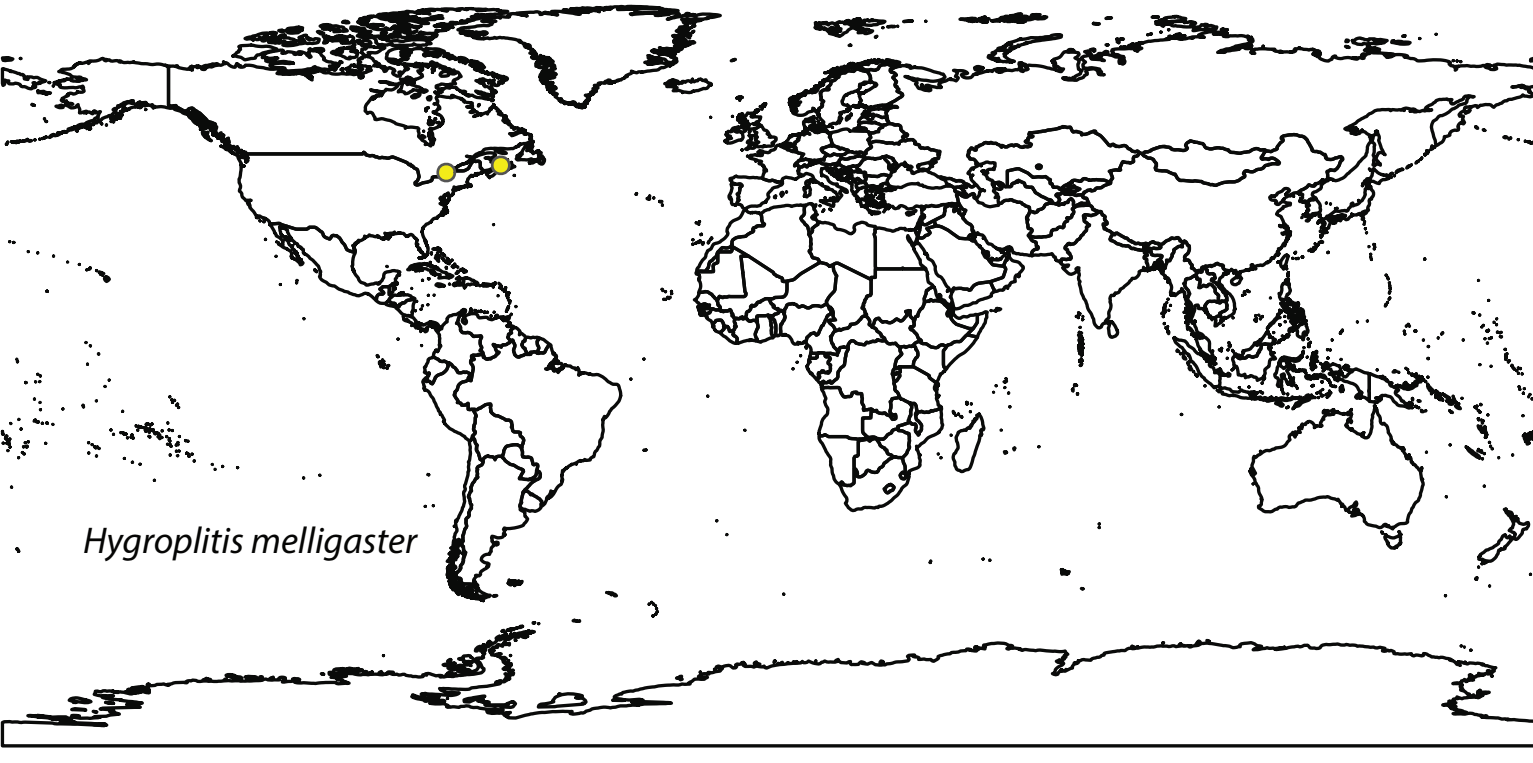

*Hygroplitis melligaster*
