# Supplementary material for: Streamlining the use of BOLD specimen data to record species distributions: a case study with ten Nearctic species of Microgastrinae (Hymenoptera: Braconidae)
Source: Biodivers Data J. 2014 Oct 29;(2):e4153. doi: 10.3897/BDJ.2.e4153 (PMC4251541; doi:10.3897/BDJ.2.e4153)
Supplement: Supplementary material 1 — Supplemental Appendix 1 [file biodiversity_data_journal-2-e4153-s001.xls]

## Sheet: Lab
Project:	SEARCH: Sample ids(633 ids), Include public records			User :	Jose Leonardo Fernandez Triana
Created :	24-September-2014
Project Code	Process ID	Sample ID	Field ID	BIN	Catalog Num	COI-5P Seq. Length	COI-5P Trace Count	COI-5P Accession	28S Seq. Length	28S Trace Count	28S Accession	Image Count	Barcode Compliant	Contamination	Stop Codon	Flagged Record	Collection Date	Identification	Life Stage	Extra Info	Voucher Type	Institution	Notes
CNCHZ	CNCHZ213-09	CAM0023	CAM0023	BOLD:AAC2372	CAM0023	657[0n]	2	JQ854555	0	0		0	Yes				19-Sep-2007	Apanteles carpatus	A			Canadian National Collection of Insects, Arachnids and Nematodes
JSHYO	JSHYO003-11	BIOUG01088-A03	L#JSETM-028	BOLD:AAC2372	BIOUG01088-A03	658[0n]	2		0	0		1	Yes				17-Jul-2010	Apanteles carpatus	A			Biodiversity Institute of Ontario	July 16-18 2010
CNCHZ	CNCHZ226-09	CAM0036	CAM0036	BOLD:AAC2372	CAM0036	657[0n]	2	JQ850509	0	0		0	Yes				10-Aug-2007	Apanteles carpatus	A			Canadian National Collection of Insects, Arachnids and Nematodes
MHABR	MHABR034-09	MIC 000034			MIC 000034	0	1		0	0		0	No				18-Jul-1947	Apanteles carpatus	A			Canadian National Collection of Insects, Arachnids and Nematodes
MHABR	MHABR041-09	MIC 000041			MIC 000041	0	2		0	0		0	No				02-Jun-1976	Apanteles carpatus	A			Canadian National Collection of Insects, Arachnids and Nematodes
MHABR	MHABR036-09	MIC 000036			MIC 000036	0	1		0	0		0	No				17-Aug-1974	Apanteles carpatus	A			Canadian National Collection of Insects, Arachnids and Nematodes
JSAUG	JSAUG1452-11	BIOUG01631-B09	L#11JSETM-018	BOLD:AAC2372		658[0n]	2		0	0		1	Yes				18-Aug-2011	Apanteles carpatus				Biodiversity Institute of Ontario
CNCHZ	CNCHZ294-09	CAM0104	CAM0104	BOLD:AAC2372	CAM0104	657[0n]	2	JQ854883	0	0		0	Yes				08-Sep-2007	Apanteles carpatus	A			Canadian National Collection of Insects, Arachnids and Nematodes
MHABR	MHABR035-09	MIC 000035			MIC 000035	0	2		0	0		0	No				15-Sep-1955	Apanteles carpatus	A			Canadian National Collection of Insects, Arachnids and Nematodes
HYCND	HYCND1790-11	CNCHYM 00081			CNCHYM 00081	0	2		0	0		1	No				02-Jun-1976	Apanteles carpatus	A			Canadian National Collection of Insects, Arachnids and Nematodes
CNCHZ	CNCHZ307-09	CAM0117	CAM0117	BOLD:AAC2372	CAM0117	657[0n]	2	JQ846784	0	0		0	Yes				30-Jul-2007	Apanteles carpatus	A			Canadian National Collection of Insects, Arachnids and Nematodes
CNCHZ	CNCHZ211-09	CAM0021	CAM0021	BOLD:AAC2372	CAM0021	657[0n]	2	JQ851089	0	0		0	Yes				13-Jul-2007	Apanteles carpatus	A			Canadian National Collection of Insects, Arachnids and Nematodes
CNCHZ	CNCHZ236-09	CAM0046	CAM0046	BOLD:AAC2372	CAM0046	657[0n]	2	JQ851082	0	0		0	Yes				23-Jul-2007	Apanteles carpatus	A			Canadian National Collection of Insects, Arachnids and Nematodes
MHABR	MHABR040-09	MIC 000040			MIC 000040	0	3		0	0		0	No				02-Jun-1976	Apanteles carpatus	A			Canadian National Collection of Insects, Arachnids and Nematodes
CNCHZ	CNCHZ243-09	CAM0053	CAM0053	BOLD:AAC2372	CAM0053	657[0n]	2	JQ854591	0	0		0	Yes				23-Jul-2007	Apanteles carpatus	A			Canadian National Collection of Insects, Arachnids and Nematodes
CNCHZ	CNCHZ253-09	CAM0063	CAM0063	BOLD:AAC2372	CAM0063	657[0n]	2	JQ846637	0	0		0	Yes				13-Jul-2007	Apanteles carpatus	A			Canadian National Collection of Insects, Arachnids and Nematodes
CNCHZ	CNCHZ210-09	CAM0020	CAM0020	BOLD:AAC2372	CAM0020	657[0n]	2	JQ853630	0	0		0	Yes				13-Jul-2007	Apanteles carpatus	A			Canadian National Collection of Insects, Arachnids and Nematodes
CNCHZ	CNCHZ248-09	CAM0058	CAM0058	BOLD:AAC2372	CAM0058	657[0n]	2	JQ850973	0	0		0	Yes				13-Jul-2007	Apanteles carpatus	A			Canadian National Collection of Insects, Arachnids and Nematodes
CNCHZ	CNCHZ216-09	CAM0026	CAM0026	BOLD:AAC2372	CAM0026	657[0n]	2	JQ849406	0	0		0	Yes				30-Jul-2007	Apanteles carpatus	A			Canadian National Collection of Insects, Arachnids and Nematodes
CNCHZ	CNCHZ239-09	CAM0049	CAM0049	BOLD:AAC2372	CAM0049	657[0n]	2	JQ851034	0	0		0	Yes				23-Jul-2007	Apanteles carpatus	A			Canadian National Collection of Insects, Arachnids and Nematodes
MHABR	MHABR037-09	MIC 000037			MIC 000037	144[0n]	2		0	0		0	No				21-Oct-1981	Apanteles carpatus	A			Canadian National Collection of Insects, Arachnids and Nematodes
MHABR	MHABR033-09	MIC 000033			MIC 000033	0	2		0	0		0	No				08-May-1928	Apanteles carpatus	A			Canadian National Collection of Insects, Arachnids and Nematodes
MHABR	MHABR038-09	MIC 000038			MIC 000038	0	2		0	0		0	No				15-Jul-1978	Apanteles carpatus	A			Canadian National Collection of Insects, Arachnids and Nematodes
CNCHZ	CNCHZ232-09	CAM0042	CAM0042	BOLD:AAC2372	CAM0042	657[0n]	2	JQ847254	0	0		0	Yes				10-Aug-2007	Apanteles carpatus	A			Canadian National Collection of Insects, Arachnids and Nematodes
HYCND	HYCND1797-11	CNCHYM 00088			CNCHYM 00088	0	2		0	0		1	No				14-Jul-1976	Apanteles conanchetorum	A			Canadian National Collection of Insects, Arachnids and Nematodes
CNCHZ	CNCHZ1100-09	MIC 000908	MIC 000908	BOLD:AAC5506	MIC 000908	657[0n]	2	JQ847227	0	0		0	Yes				18-Jul-2008	Apanteles conanchetorum	A			Canadian National Collection of Insects, Arachnids and Nematodes
CNFNF	CNFNF286-14	BIOUG10353-H05	GMP#01452	BOLD:AAC5506	BIOUG10353-H05	543[0n]	1		0	0		0	No				18-Jul-2013	Apanteles conanchetorum	A	Forillon National Park	museum voucher	Biodiversity Institute of Ontario	Collected from 15 Jul 2013 - 22 Jul 2013
CNCHZ	CNCHZ1097-09	MIC 000905	MIC 000905	BOLD:AAC5506	MIC 000905	657[0n]	2	JQ848995	0	0		0	Yes				18-Jul-2008	Apanteles conanchetorum	A			Canadian National Collection of Insects, Arachnids and Nematodes
ASGLF	ASGLF313-11	BIOUG00989-E12	MAS919-10	BOLD:AAC5506	BIOUG00989-E12	658[0n]	2	JQ854010	0	0		1	Yes				19-Sep-2010	Apanteles conanchetorum	A	Windy Bluff		Research Collection of M. Alex Smith
JSHYO	JSHYO534-11	BIOUG01252-E11	L#JSETM-032	BOLD:AAC5506	BIOUG01252-E11	642[0n]	2		0	0		1	Yes				03-Aug-2010	Apanteles conanchetorum	A			Biodiversity Institute of Ontario	August 2-4 2010
CNWLM	CNWLM799-13	BIOUG07019-B11	GMP#00284	BOLD:AAC5507	BIOUG07019-B11	614[0n]	1		0	0		0	No				19-Jul-2012	Apanteles conanchetorum		Waterton Lakes NP	museum voucher	Biodiversity Institute of Ontario	Collected from July 17 to 24 2012
CNFNF	CNFNF871-14	BIOUG10403-A09	GMP#01452	BOLD:AAC5506	BIOUG10403-A09	525[0n]	1		0	0		0	No				22-Jul-2013	Apanteles conanchetorum	A	Forillon National Park	museum voucher	Biodiversity Institute of Ontario	Collected from 15 Jul 2013 - 22 Jul 2013
MHABR	MHABR063-09	MIC 000063			MIC 000063	0	0		0	0		0	No				15-Aug-1945	Apanteles conanchetorum	A			Canadian National Collection of Insects, Arachnids and Nematodes
CNFNF	CNFNF627-14	BIOUG10360-E02	GMP#01452	BOLD:AAC5506	BIOUG10360-E02	547[0n]	1		0	0		0	No				18-Jul-2013	Apanteles conanchetorum	A	Forillon National Park	museum voucher	Biodiversity Institute of Ontario	Collected from 15 Jul 2013 - 22 Jul 2013
CNFNF	CNFNF423-14	BIOUG10358-C12	GMP#01452	BOLD:AAC5506	BIOUG10358-C12	556[0n]	1		0	0		0	No				18-Jul-2013	Apanteles conanchetorum	A	Forillon National Park	museum voucher	Biodiversity Institute of Ontario	Collected from 15 Jul 2013 - 22 Jul 2013
ASGLF	ASGLF314-11	BIOUG00989-F01	MAS919-10	BOLD:AAC5506	BIOUG00989-F01	658[0n]	2	JQ849560	0	0		1	Yes				19-Sep-2010	Apanteles conanchetorum	A	Windy Bluff		Research Collection of M. Alex Smith
CNFNR	CNFNR2363-14	BIOUG11905-C04	GMP#01450	BOLD:AAC5506	BIOUG11905-C04	588[0n]	1		0	0		0	No				15-Jul-2013	Apanteles conanchetorum	A	Forillon National Park	museum voucher	Biodiversity Institute of Ontario	Collected from 5 Jul 2013 - 15 Jul 2013
CNCHZ	CNCHZ1094-09	MIC 000902	MIC 000902	BOLD:AAC5506	MIC 000902	657[0n]	2	JQ854041	0	0		0	Yes				11-Jul-2008	Apanteles conanchetorum	A			Canadian National Collection of Insects, Arachnids and Nematodes
MHABR	MHABR058-09	MIC 000058			MIC 000058	144[0n]	3		0	0		0	No				15-Aug-1935	Apanteles conanchetorum	A			Canadian National Collection of Insects, Arachnids and Nematodes	Homotype
CNCHZ	CNCHZ286-09	CAM0096	CAM0096	BOLD:AAC5507	CAM0096	657[0n]	2	JQ849411	0	0		0	Yes				05-Oct-2007	Apanteles conanchetorum	A			Canadian National Collection of Insects, Arachnids and Nematodes
CNFNR	CNFNR2583-14	BIOUG11907-E10	GMP#01450	BOLD:AAC5506	BIOUG11907-E10	564[0n]	1		0	0		0	No				15-Jul-2013	Apanteles conanchetorum	A	Forillon National Park	museum voucher	Biodiversity Institute of Ontario	Collected from 5 Jul 2013 - 15 Jul 2013
CNCHX	CNCHX143-09	CAM1013	CAM1013	BOLD:AAC5506	CAM1013	658[0n]	2	HM430831	0	0		0	Yes					Apanteles conanchetorum	A			Canadian National Collection of Insects, Arachnids and Nematodes
JSSEP	JSSEP761-11	BIOUG01631-H02	L#11JSETM-021	BOLD:AAC5506		658[0n]	2		0	0		0	Yes				14-Sep-2011	Apanteles conanchetorum	A			Biodiversity Institute of Ontario	Sep 9-20, 2011
HYCND	HYCND1798-11	CNCHYM 00089			CNCHYM 00089	0	2		0	0		1	No				04-Oct-1976	Apanteles conanchetorum	A			Canadian National Collection of Insects, Arachnids and Nematodes
CNWLF	CNWLF652-12	BIOUG04245-B10	GMP#00285	BOLD:AAC5507	BIOUG04245-B10	658[0n]	3		0	0		0	Yes				26-Jul-2012	Apanteles conanchetorum	A	Waterton Lakes NP	museum voucher	Biodiversity Institute of Ontario	Collected from July 24 to 31 2012
ASGLF	ASGLF310-11	BIOUG00989-E09	MAS919-10	BOLD:AAC5506	BIOUG00989-E09	658[0n]	2	JQ854977	0	0		1	Yes				19-Sep-2010	Apanteles conanchetorum	A	Windy Bluff		Research Collection of M. Alex Smith
CNFNR	CNFNR2302-14	BIOUG11904-F02	GMP#01450	BOLD:AAC5506	BIOUG11904-F02	594[0n]	1		0	0		0	No				15-Jul-2013	Apanteles conanchetorum	A	Forillon National Park	museum voucher	Biodiversity Institute of Ontario	Collected from 5 Jul 2013 - 15 Jul 2013
BBHYK	BBHYK285-10	10BBCHY-2243	L#PC2010PA-260	BOLD:AAC5507	10BBCHY-2243	658[0n]	2	JN293210	0	0		1	Yes				14-Aug-2010	Apanteles conanchetorum	A	Prince Albert NP		Biodiversity Institute of Ontario	Collected from Aug 14-17
CNCHZ	CNCHZ792-09	MIC 000600	MIC 000600	BOLD:AAC5506	MIC 000600	657[0n]	2	JQ848167	0	0		0	Yes				06-Aug-2008	Apanteles conanchetorum	A			Canadian National Collection of Insects, Arachnids and Nematodes
BBHYN	BBHYN214-10	PCPP10-0759	L#10PCPP-0379	BOLD:AAC5506	PCPP10-0759	633[0n]	1		0	0		1	No				28-Jun-2010	Apanteles conanchetorum	A	Point Pelee NP		Biodiversity Institute of Ontario
CNFNR	CNFNR2792-14	BIOUG11909-G05	GMP#01450	BOLD:AAC5506	BIOUG11909-G05	540[0n]	1		0	0		0	No				15-Jul-2013	Apanteles conanchetorum	A	Forillon National Park	museum voucher	Biodiversity Institute of Ontario	Collected from 5 Jul 2013 - 15 Jul 2013
ASGLF	ASGLF353-11	BIOUG00991-A05	MAS1000-10	BOLD:AAC5506	BIOUG00991-A05	658[0n]	2	JQ854247	0	0		1	Yes				23-Oct-2010	Apanteles conanchetorum	A	Windy Bluff		Research Collection of M. Alex Smith
ASGLF	ASGLF115-11	BIOUG00914-E04	MAS1121-10	BOLD:AAC5506	BIOUG00914-E04	658[0n]	2	JQ854398	0	0		1	Yes				21-Nov-2010	Apanteles conanchetorum	A	Windy Bluff		Research Collection of M. Alex Smith
ASGLF	ASGLF114-11	BIOUG00914-E03	MAS1121-10	BOLD:AAC5506	BIOUG00914-E03	658[0n]	2	JQ853427	0	0		1	Yes				21-Nov-2010	Apanteles conanchetorum	A	Windy Bluff		Research Collection of M. Alex Smith
CNPEP	CNPEP1205-14	BIOUG10961-E03	GMP#01362	BOLD:AAC5507	BIOUG10961-E03	588[0n]	1		0	0		0	No				17-Jul-2013	Apanteles conanchetorum	A	Prince Edward Island National Park	museum voucher	Biodiversity Institute of Ontario	Collected from 10 Jul 2013 - 17 Jul 2013: 2 malaise traps combined (+GMP#01363)
SMTPD	SMTPD5714-13	BIOUG08661-F09	GMP#02213	BOLD:AAC5506	BIOUG08661-F09	549[0n]	1		0	0		0	No				28-Sep-2013	Apanteles conanchetorum	A	Mountsberg Conservation Area	museum voucher	Biodiversity Institute of Ontario	Malaise 22-Sep-13 to 28-Sep-13
CNWLN	CNWLN171-13	BIOUG07067-E03	GMP#00287	BOLD:AAC5507	BIOUG07067-E03	556[0n]	1		0	0		0	No				02-Aug-2012	Apanteles conanchetorum	A	Waterton Lakes NP	museum voucher	Biodiversity Institute of Ontario	Collected from July 31 to August 7 2012
JSHYP	JSHYP027-11	BIOUG01280-G04	L#JSETM-047	BOLD:AAC5506	BIOUG01280-G04	658[0n]	2		0	0		1	Yes				29-Aug-2010	Apanteles conanchetorum	A			Biodiversity Institute of Ontario	August 27- September 1 2010
CNCHZ	CNCHZ350-09	CAM0160	CAM0160	BOLD:AAC5506	CAM0160	657[0n]	2	JQ852744	0	0		0	Yes				01-Sep-2007	Apanteles conanchetorum	A			Canadian National Collection of Insects, Arachnids and Nematodes
CNWLM	CNWLM287-13	BIOUG06873-E09	GMP#00284	BOLD:AAC5507	BIOUG06873-E09	591[0n]	1		0	0		0	No				19-Jul-2012	Apanteles conanchetorum	A	Waterton Lakes NP	museum voucher	Biodiversity Institute of Ontario	Collected from July 17 to 24 2012
CNFNT	CNFNT1471-14	BIOUG12293-G01	GMP#01458	BOLD:AAC5506	BIOUG12293-G01	552[0n]	1		0	0		0	No				12-Aug-2013	Apanteles conanchetorum	A	Forillon National Park	museum voucher	Biodiversity Institute of Ontario	Collected from 5 Aug 2013 - 12 Aug 2013: 2 malaise traps combined (+GMP#01459)
CNFNF	CNFNF1260-14	BIOUG10408-B06	GMP#01452	BOLD:AAC5506	BIOUG10408-B06	593[0n]	1		0	0		0	No				18-Jul-2013	Apanteles conanchetorum	A	Forillon National Park	museum voucher	Biodiversity Institute of Ontario	Collected from 15 Jul 2013 - 22 Jul 2013
ASGLF	ASGLF312-11	BIOUG00989-E11	MAS919-10	BOLD:AAC5506	BIOUG00989-E11	658[0n]	2	JQ847392	0	0		1	Yes				19-Sep-2010	Apanteles conanchetorum	A	Windy Bluff		Research Collection of M. Alex Smith
CNFNF	CNFNF441-14	BIOUG10358-E06	GMP#01452	BOLD:AAC5506	BIOUG10358-E06	567[0n]	1		0	0		0	No				22-Jul-2013	Apanteles conanchetorum	A	Forillon National Park	museum voucher	Biodiversity Institute of Ontario	Collected from 15 Jul 2013 - 22 Jul 2013
PHOCT	PHMTX962-11	BIOUG00861-G06	L#PHPUS-028	BOLD:AAC5506	BIOUG00861-G06	658[0n]	2		0	0		1	Yes				15-Oct-2010	Apanteles conanchetorum	A			Biodiversity Institute of Ontario	Oct 11-19
CNFNG	CNFNG557-14	BIOUG10550-D04	GMP#01456	BOLD:AAC5506	BIOUG10550-D04	530[0n]	1		0	0		0	No				05-Aug-2013	Apanteles conanchetorum	A	Forillon National Park	museum voucher	Biodiversity Institute of Ontario	Collected from 30 Jul 2013 - 5 Aug 2013: 2 malaise traps combined (+GMP#01457)
HESEP	HESEP836-12	BIOUG02507-D09	L#PHPUS-024	BOLD:AAC5506		625[0n]	1		0	0		0	No				08-Sep-2010	Apanteles conanchetorum	A			Biodiversity Institute of Ontario	Sep 5-12
CNFNF	CNFNF870-14	BIOUG10403-A08	GMP#01452	BOLD:AAC5506	BIOUG10403-A08	560[0n]	1		0	0		0	No				18-Jul-2013	Apanteles conanchetorum	A	Forillon National Park	museum voucher	Biodiversity Institute of Ontario	Collected from 15 Jul 2013 - 22 Jul 2013
ASGLF	ASGLF118-11	BIOUG00914-E07	MAS1121-10	BOLD:AAC5506	BIOUG00914-E07	658[0n]	2	JQ849697	0	0		1	Yes				21-Nov-2010	Apanteles conanchetorum	A	Windy Bluff		Research Collection of M. Alex Smith
CNCHZ	CNCHZ337-09	CAM0147	CAM0147	BOLD:AAC5506	CAM0147	657[0n]	2	JQ849769	0	0		0	Yes				01-Sep-2007	Apanteles conanchetorum	A			Canadian National Collection of Insects, Arachnids and Nematodes
ASGLF	ASGLF167-11	BIOUG00988-A09	MAS1029-10	BOLD:AAC5506	BIOUG00988-A09	658[0n]	2	JQ850866	0	0		1	Yes				29-Oct-2010	Apanteles conanchetorum	A	25 Division St.		Research Collection of M. Alex Smith
CNFNR	CNFNR2835-14	BIOUG11910-C01	GMP#01450	BOLD:AAC5506	BIOUG11910-C01	585[0n]	1		0	0		0	No				15-Jul-2013	Apanteles conanchetorum	A	Forillon National Park	museum voucher	Biodiversity Institute of Ontario	Collected from 5 Jul 2013 - 15 Jul 2013
CNWLF	CNWLF631-12	BIOUG04245-A01	GMP#00285	BOLD:AAC5507	BIOUG04245-A01	631[0n]	3		0	0		1	Yes				26-Jul-2012	Apanteles conanchetorum	A	Waterton Lakes NP	museum voucher	Biodiversity Institute of Ontario	Collected from July 24 to 31 2012
ASGLF	ASGLF131-11	BIOUG00914-F08	MAS1121-10	BOLD:AAC5506	BIOUG00914-F08	658[0n]	2	JQ849772	0	0		1	Yes				21-Nov-2010	Apanteles conanchetorum	A	Windy Bluff		Research Collection of M. Alex Smith
CNFNG	CNFNG1150-14	BIOUG10661-F02	GMP#01456	BOLD:AAC5506	BIOUG10661-F02	549[0n]	1		0	0		0	No				05-Aug-2013	Apanteles conanchetorum	A	Forillon National Park	museum voucher	Biodiversity Institute of Ontario	Collected from 30 Jul 2013 - 5 Aug 2013: 2 malaise traps combined (+GMP#01457)
CNFNR	CNFNR2834-14	BIOUG11910-B12	GMP#01450	BOLD:AAC5506	BIOUG11910-B12	594[0n]	1		0	0		0	No				15-Jul-2013	Apanteles conanchetorum	A	Forillon National Park	museum voucher	Biodiversity Institute of Ontario	Collected from 5 Jul 2013 - 15 Jul 2013
HYCND	HYCND1803-11	CNCHYM 00093			CNCHYM 00093	0	0		0	0		1	No				15-Aug-1945	Apanteles conanchetorum	A	Ex. Under Caterpillar on convolvulus atvensis		Canadian National Collection of Insects, Arachnids and Nematodes
CNCHZ	CNCHZ195-09	CAM0005	CAM0005	BOLD:AAC5506	CAM0005	657[0n]	2	JQ849795	0	0		0	Yes				19-Sep-2007	Apanteles conanchetorum	A			Canadian National Collection of Insects, Arachnids and Nematodes
CNCHZ	CNCHZ275-09	CAM0085	CAM0085	BOLD:AAC5506	CAM0085	657[0n]	2	JQ852939	0	0		0	Yes				10-Aug-2007	Apanteles conanchetorum	A			Canadian National Collection of Insects, Arachnids and Nematodes
ASGLF	ASGLF261-11	BIOUG00989-A08	MAS1029-10	BOLD:AAC5506	BIOUG00989-A08	658[0n]	2	JQ852560	0	0		1	Yes				29-Oct-2010	Apanteles conanchetorum	A	25 Division St.		Research Collection of M. Alex Smith
SSPCC	SSPAC3799-13	BIOUG08192-F10	L#12BIOBUS-0944	BOLD:AAC5507	BIOUG08192-F10	601[0n]	1		0	0		0	No				11-Jul-2012	Apanteles conanchetorum	A	Prince Albert NP	museum voucher	Biodiversity Institute of Ontario	Collected from July 10-14
JSHYP	JSHYP661-12	BIOUG01330-D09	L#JSETM-058	BOLD:AAC5506	BIOUG01330-D09	658[0n]	2		0	0		1	Yes				18-Oct-2010	Apanteles conanchetorum	A			Biodiversity Institute of Ontario	October 14-22 2010
CNFNF	CNFNF270-14	BIOUG10353-G01	GMP#01452	BOLD:AAC5506	BIOUG10353-G01	574[0n]	1		0	0		0	No				18-Jul-2013	Apanteles conanchetorum	A	Forillon National Park	museum voucher	Biodiversity Institute of Ontario	Collected from 15 Jul 2013 - 22 Jul 2013
ASGLF	ASGLF136-11	BIOUG00914-G01	MAS1121-10	BOLD:AAC5506	BIOUG00914-G01	658[0n]	2	JQ849494	0	0		1	Yes				21-Nov-2010	Apanteles conanchetorum	A	Windy Bluff		Research Collection of M. Alex Smith
CNWLM	CNWLM1411-13	BIOUG07067-C07	GMP#00284	BOLD:AAC5507	BIOUG07067-C07	601[0n]	1		0	0		0	No				19-Jul-2012	Apanteles conanchetorum	A	Waterton Lakes NP	museum voucher	Biodiversity Institute of Ontario	Collected from July 17 to 24 2012
CNFNS	CNFNS886-14	BIOUG12037-E03	GMP#01454	BOLD:AAC5506	BIOUG12037-E03	540[0n]	1		0	0		0	No				30-Jul-2013	Apanteles conanchetorum	A	Forillon National Park	museum voucher	Biodiversity Institute of Ontario	Collected from 22 Jul 2013 - 30 Jul 2013: 2 malaise traps combined (+GMP#01455)
MHABR	MHABR061-09	MIC 000061			MIC 000061	144[0n]	2		0	0		0	No				02-Jul-1975	Apanteles conanchetorum	A			Canadian National Collection of Insects, Arachnids and Nematodes
ASGLF	ASGLF311-11	BIOUG00989-E10	MAS919-10	BOLD:AAC5506	BIOUG00989-E10	658[0n]	2	JQ848232	0	0		1	Yes				19-Sep-2010	Apanteles conanchetorum	A	Windy Bluff		Research Collection of M. Alex Smith
CNFNF	CNFNF1033-14	BIOUG10405-G04	GMP#01452	BOLD:AAC5506	BIOUG10405-G04	598[0n]	1		0	0		0	No				22-Jul-2013	Apanteles conanchetorum	A	Forillon National Park	museum voucher	Biodiversity Institute of Ontario	Collected from 15 Jul 2013 - 22 Jul 2013
MHABR	MHABR060-09	MIC 000060			MIC 000060	144[0n]	2		0	0		0	No				20-Jul-1972	Apanteles conanchetorum	A			Canadian National Collection of Insects, Arachnids and Nematodes
CNCHZ	CNCHZ349-09	CAM0159	CAM0159	BOLD:AAC5506	CAM0159	657[0n]	2	JQ853360	0	0		0	Yes				01-Sep-2007	Apanteles conanchetorum	A			Canadian National Collection of Insects, Arachnids and Nematodes
SSROB	SSROB2643-14	BIOUG13530-A05	L#12BIOBUS-2522	BOLD:AAC5506	BIOUG13530-A05	588[0n]	1		0	0		0	No				07-Jun-2013	Apanteles conanchetorum	A	Rouge National Urban Park	museum voucher	Biodiversity Institute of Ontario	5 min sweeping (3), 3 sweepers (4 sweeps), partly cloudy/light drizzle
ASGLF	ASGLF129-11	BIOUG00914-F06	MAS1121-10	BOLD:AAC5506	BIOUG00914-F06	658[0n]	2	JQ852350	0	0		1	Yes				21-Nov-2010	Apanteles conanchetorum	A	Windy Bluff		Research Collection of M. Alex Smith
HYCND	HYCND1800-11	CNCHYM 03970			CNCHYM 03970	0	4		0	0		1	No				05-Oct-1976	Apanteles conanchetorum	A			Canadian National Collection of Insects, Arachnids and Nematodes
CNWLF	CNWLF656-12	BIOUG04245-C02	GMP#00285	BOLD:AAC5507	BIOUG04245-C02	627[0n]	1		0	0		0	No				26-Jul-2012	Apanteles conanchetorum	A	Waterton Lakes NP	museum voucher	Biodiversity Institute of Ontario	Collected from July 24 to 31 2012
ASGLF	ASGLF337-11	BIOUG00989-G12	MAS919-10	BOLD:AAC5506	BIOUG00989-G12	658[0n]	2	JQ852319	0	0		1	Yes				19-Sep-2010	Apanteles conanchetorum	A	Windy Bluff		Research Collection of M. Alex Smith
PHSEP	PHSEP1889-11	BIOUG01309-D01	L#PHPUS-026	BOLD:AAC5506	BIOUG01309-D01	658[0n]	2		0	0		0	Yes				23-Sep-2010	Apanteles conanchetorum	A			Biodiversity Institute of Ontario	Sep 19-27
ASGLF	ASGLF119-11	BIOUG00914-E08	MAS1121-10	BOLD:AAC5506	BIOUG00914-E08	658[0n]	2	JQ847630	0	0		1	Yes				21-Nov-2010	Apanteles conanchetorum	A	Windy Bluff		Research Collection of M. Alex Smith
CNFNR	CNFNR2706-14	BIOUG11908-H02	GMP#01450	BOLD:AAC5506	BIOUG11908-H02	519[0n]	1		0	0		0	No				15-Jul-2013	Apanteles conanchetorum	A	Forillon National Park	museum voucher	Biodiversity Institute of Ontario	Collected from 5 Jul 2013 - 15 Jul 2013
CNFNR	CNFNR2146-14	BIOUG11903-A01	GMP#01450	BOLD:AAC5506	BIOUG11903-A01	564[0n]	1		0	0		0	No				15-Jul-2013	Apanteles conanchetorum	A	Forillon National Park	museum voucher	Biodiversity Institute of Ontario	Collected from 5 Jul 2013 - 15 Jul 2013
CNFNT	CNFNT1416-14	BIOUG12293-B06	GMP#01458	BOLD:AAC5506	BIOUG12293-B06	555[0n]	1		0	0		0	No				12-Aug-2013	Apanteles conanchetorum	A	Forillon National Park	museum voucher	Biodiversity Institute of Ontario	Collected from 5 Aug 2013 - 12 Aug 2013: 2 malaise traps combined (+GMP#01459)
CNFNF	CNFNF984-14	BIOUG10405-C03	GMP#01452	BOLD:AAC5506	BIOUG10405-C03	593[0n]	1		0	0		0	No				18-Jul-2013	Apanteles conanchetorum	A	Forillon National Park	museum voucher	Biodiversity Institute of Ontario	Collected from 15 Jul 2013 - 22 Jul 2013
CNWLM	CNWLM309-13	BIOUG06873-G07	GMP#00284	BOLD:AAC5507	BIOUG06873-G07	597[0n]	1		0	0		0	No				19-Jul-2012	Apanteles conanchetorum	A	Waterton Lakes NP	museum voucher	Biodiversity Institute of Ontario	Collected from July 17 to 24 2012
MHABR	MHABR059-09	MIC 000059			MIC 000059	144[0n]	3		0	0		0	No				15-Aug-1935	Apanteles conanchetorum	A			Canadian National Collection of Insects, Arachnids and Nematodes
HYCND	HYCND1799-11	CNCHYM 00090			CNCHYM 00090	0	3		0	0		1	No				16-Jun-1975	Apanteles conanchetorum	A			Canadian National Collection of Insects, Arachnids and Nematodes
MHABR	MHABR064-09	MIC 000064			MIC 000064	144[0n]	1		0	0		0	No				19-Jul-1976	Apanteles conanchetorum	A			Canadian National Collection of Insects, Arachnids and Nematodes
CNFNR	CNFNR2271-14	BIOUG11904-C07	GMP#01450	BOLD:AAC5506	BIOUG11904-C07	588[0n]	1		0	0		0	No				15-Jul-2013	Apanteles conanchetorum	A	Forillon National Park	museum voucher	Biodiversity Institute of Ontario	Collected from 5 Jul 2013 - 15 Jul 2013
ASGLF	ASGLF366-11	BIOUG00991-B06	MAS912-10	BOLD:AAC5506	BIOUG00991-B06	658[0n]	2	JQ847306	0	0		1	Yes				12-Sep-2010	Apanteles conanchetorum	A	Windy Bluff		Research Collection of M. Alex Smith
SSPAC	SSPAC13669-13	BIOUG09238-D12	L#12BIOBUS-0997	BOLD:AAC5507	BIOUG09238-D12	585[0n]	1		0	0		0	No				14-Jul-2012	Apanteles conanchetorum	A	Prince Albert NP	museum voucher	Biodiversity Institute of Ontario
CNFNS	CNFNS943-14	BIOUG12038-B01	GMP#01454	BOLD:AAC5506	BIOUG12038-B01	552[0n]	1		0	0		0	No				30-Jul-2013	Apanteles conanchetorum	A	Forillon National Park	museum voucher	Biodiversity Institute of Ontario	Collected from 22 Jul 2013 - 30 Jul 2013: 2 malaise traps combined (+GMP#01455)
ASGLF	ASGLF260-11	BIOUG00989-A07	MAS1029-10	BOLD:AAC5506	BIOUG00989-A07	658[0n]	2	JQ855130	0	0		1	Yes				29-Oct-2010	Apanteles conanchetorum	A	25 Division St.		Research Collection of M. Alex Smith
CNFNF	CNFNF2105-14	BIOUG10479-G03	GMP#01452	BOLD:AAC5506	BIOUG10479-G03	590[0n]	1		0	0		0	No				18-Jul-2013	Apanteles conanchetorum	A	Forillon National Park	museum voucher	Biodiversity Institute of Ontario	Collected from 15 Jul 2013 - 22 Jul 2013
CNFNR	CNFNR2703-14	BIOUG11908-G11	GMP#01450	BOLD:AAC5506	BIOUG11908-G11	609[0n]	1		0	0		0	No				15-Jul-2013	Apanteles conanchetorum	A	Forillon National Park	museum voucher	Biodiversity Institute of Ontario	Collected from 5 Jul 2013 - 15 Jul 2013
CNWLF	CNWLF272-12	BIOUG03486-E11	GMP#00285	BOLD:AAC5507	BIOUG03486-E11	658[0n]	1		0	0		1	No				26-Jul-2012	Apanteles conanchetorum	A	Waterton Lakes NP	museum voucher	Biodiversity Institute of Ontario	Collected from July 24 to 31 2012
CNCHX	CNCHX240-09	WMIC 0240	WMIC 0240	BOLD:AAC5506	WMIC 0240	658[0n]	2	HM430912	0	0		0	Yes				31-Jul-2005	Apanteles conanchetorum	A			Canadian National Collection of Insects, Arachnids and Nematodes
CNWLF	CNWLF646-12	BIOUG04245-B04	GMP#00285	BOLD:AAC5507	BIOUG04245-B04	658[0n]	3		0	0		1	Yes				26-Jul-2012	Apanteles conanchetorum	A	Waterton Lakes NP	museum voucher	Biodiversity Institute of Ontario	Collected from July 24 to 31 2012
MHABR	MHABR062-09	MIC 000062			MIC 000062	144[0n]	4		0	0		0	No				26-Aug-1976	Apanteles conanchetorum	A			Canadian National Collection of Insects, Arachnids and Nematodes
CNFNR	CNFNR2541-14	BIOUG11907-B04	GMP#01450	BOLD:AAC5506	BIOUG11907-B04	540[0n]	1		0	0		0	No				15-Jul-2013	Apanteles conanchetorum	A	Forillon National Park	museum voucher	Biodiversity Institute of Ontario	Collected from 5 Jul 2013 - 15 Jul 2013
JSHYP	JSHYP610-11	BIOUG01327-H05	L#JSETM-056	BOLD:AAC5506	BIOUG01327-H05	658[0n]	2		0	0		1	Yes				04-Oct-2010	Apanteles conanchetorum	A			Biodiversity Institute of Ontario	October 01-08 2010
CNPKJ	CNPKJ648-14	BIOUG11625-E04	GMP#01510	BOLD:AAA3764	BIOUG11625-E04	590[0n]	1		0	0		0	No				26-Aug-2013	Apanteles ensiger	A	Pukaskwa National Park	museum voucher	Biodiversity Institute of Ontario	Collected from 19 Aug 2013 - 26 Aug 2013: 2 malaise traps combined (+GMP#01511)
NCCC	NCCC149-11	BIOUG01657-E06	L#11NCC-02	BOLD:AAA3764	BIOUG01657-E06	658[0n]	2		0	0		0	No				06-Oct-2011	Apanteles ensiger	A	North Bear		Biodiversity Institute of Ontario	Collected Sept 20-Oct 6 2011
ASCON	ASWAV869-08	07PROBE-22328	07PROBE-22328	BOLD:AAA3764	07PROBE-22328	654[0n]	2	GU141047	0	0		1	Yes				02-Aug-2007	Apanteles ensiger	A			Biodiversity Institute of Ontario	<VERBATIM LOCALITY>|Ramsay Creek|58.754|-93.949|</VERBATIM LOCALITY>
CNKJF	CNKJF1743-14	BIOUG11759-F05	GMP#01276	BOLD:AAA3764	BIOUG11759-F05	591[0n]	1		0	0		0	No				25-Jul-2013	Apanteles ensiger	A	Kejimkujik National Park	museum voucher	Biodiversity Institute of Ontario	Collected from 18 Jul 2013 - 25 Jul 2013: 2 malaise traps combined (+GMP#01277)
CNCHX	CNCHX090-09	CAM0960	CAM0960	BOLD:AAA3764	CAM0960	658[0n]	2	HM430741	0	0		0	Yes				16-Jul-2008	Apanteles ensiger	A			Canadian National Collection of Insects, Arachnids and Nematodes
CNPKO	CNPKO3073-14	BIOUG14172-C09	GMP#01512	BOLD:AAA3764	BIOUG14172-C09	594[0n]	1		0	0		0	No				01-Sep-2013	Apanteles ensiger		Pukaskwa National Park	museum voucher	Biodiversity Institute of Ontario	Collected from 26 Aug 2013 - 2 Sep 2013: 2 malaise traps combined (+GMP#01513)
JSSEP	JSSEP718-11	BIOUG01631-D07	L#11JSETM-021	BOLD:AAA3764		658[0n]	2		0	0		0	Yes				14-Sep-2011	Apanteles ensiger	A			Biodiversity Institute of Ontario	Sep 9-20, 2011
SMTPD	SMTPD5208-13	BIOUG08683-C10	GMP#02132	BOLD:ACE6783	BIOUG08683-C10	594[0n]	1		0	0		0	No				27-Sep-2013	Apanteles ensiger	A	Biodiversity Institute of Ontario	museum voucher	Biodiversity Institute of Ontario	Collected Sept 23-27, min temp: 4C, max temp: 40C
CNPKO	CNPKO3116-14	BIOUG14172-G04	GMP#01512	BOLD:AAA3764	BIOUG14172-G04	594[0n]	1		0	0		0	No				01-Sep-2013	Apanteles ensiger		Pukaskwa National Park	museum voucher	Biodiversity Institute of Ontario	Collected from 26 Aug 2013 - 2 Sep 2013: 2 malaise traps combined (+GMP#01513)
CNCBM	CNCHZ199-09	CAM0009	CAM0009	BOLD:AAA3764	CAM0009	657[0n]	2	JN639902	0	0		0	Yes				19-Sep-2007	Apanteles ensiger	A			Canadian National Collection of Insects, Arachnids and Nematodes
MBIOD	MBIOD945-13	BIOUG08669-D07	GMP#00956	BOLD:ACE6783	BIOUG08669-D07	602[0n]	1		0	0		0	No				13-Jun-2013	Apanteles ensiger	A	Biodiversity Institute of Ontario	museum voucher	Biodiversity Institute of Ontario	Collected June 6 - June 13, 2013. Overcast, 17C on day of collection. Weekly min: 9C, max: 30C
CNCHX	CNCHX070-09	CAM0940	CAM0940	BOLD:ACE6783	CAM0940	658[0n]	2	HM430721	0	0		0	Yes				17-Jul-2008	Apanteles ensiger	A			Canadian National Collection of Insects, Arachnids and Nematodes
MHABR	MHABR087-09	MIC 000087			MIC 000087	143[1n]	4		0	0		0	No				16-Jul-1972	Apanteles ensiger	A			Canadian National Collection of Insects, Arachnids and Nematodes
SMTPD	SMTPD3239-13	BIOUG08641-D09	GMP#02150	BOLD:ACE6783	BIOUG08641-D09	555[0n]	1		0	0		0	No				27-Sep-2013	Apanteles ensiger	A	Guelph, John F. Ross C.V.I.	museum voucher	Biodiversity Institute of Ontario	Collected from 23-Sept-13 to 27-Sept-240
SMTPD	SMTPD5253-13	BIOUG08683-G07	GMP#02132	BOLD:ACE6783	BIOUG08683-G07	588[0n]	1		0	0		0	No				27-Sep-2013	Apanteles ensiger	A	Biodiversity Institute of Ontario	museum voucher	Biodiversity Institute of Ontario	Collected Sept 23-27, min temp: 4C, max temp: 40C
SMTPD	SMTPD4869-13	BIOUG08663-H08	GMP#02164	BOLD:ACE6783	BIOUG08663-H08	555[0n]	1		0	0		0	No				27-Sep-2013	Apanteles ensiger	A	Paris, Holy Family School	museum voucher	Biodiversity Institute of Ontario	Collected from 23-Sept-13 to 27-Sept-205
CNROS	CNROS470-13	BIOUG09765-A01	GMP#01070	BOLD:AAA3764	BIOUG09765-A01	585[0n]	1		0	0		0	No				27-Aug-2013	Apanteles ensiger	A	Rouge National Urban Park	museum voucher	Biodiversity Institute of Ontario	Malaise 20-Aug-13 to 27-Aug-13: 2 traps combined (+GMP#01071)
SMTPD	SMTPD5202-13	BIOUG08683-C04	GMP#02132	BOLD:ACE6783	BIOUG08683-C04	558[0n]	1		0	0		0	No				27-Sep-2013	Apanteles ensiger	A	Biodiversity Institute of Ontario	museum voucher	Biodiversity Institute of Ontario	Collected Sept 23-27, min temp: 4C, max temp: 40C
CNPKO	CNPKO1489-14	BIOUG14108-F04	GMP#01512	BOLD:AAA3764	BIOUG14108-F04	576[0n]	1		0	0		0	No				01-Sep-2013	Apanteles ensiger		Pukaskwa National Park	museum voucher	Biodiversity Institute of Ontario	Collected from 26 Aug 2013 - 2 Sep 2013: 2 malaise traps combined (+GMP#01513)
SMTPD	SMTPD3828-13	BIOUG08647-G04	GMP#02168	BOLD:ACE6783	BIOUG08647-G04	549[0n]	1		0	0		0	No				27-Sep-2013	Apanteles ensiger	A	St. Marys, Little Falls Public School	museum voucher	Biodiversity Institute of Ontario	Collected from 23-Sept-13 to 27-Sept-193
MBION	MBION508-14	BIOUG09932-C07	GMP#02134	BOLD:ACE6783	BIOUG09932-C07	558[0n]	1		0	0		0	No				04-Oct-2013	Apanteles ensiger	A	Biodiversity Institute of Ontario	museum voucher	Biodiversity Institute of Ontario	Collected Sept 30 - Oct 4, sunny week, min temp: 7C, max temp: 39C
CNCHY	ASWA309-08	HYM00001023	HYM00001023	BOLD:ACE6783	HYM00001023	657[0n]	2	JQ851331	0	0		0	Yes				11-Jun-2007	Apanteles ensiger	A			Canadian National Collection of Insects, Arachnids and Nematodes
CNGBG	CNGBG1411-14	BIOUG10202-A04	GMP#01544	BOLD:AAA3764	BIOUG10202-A04	591[0n]	1		0	0		0	No				27-Aug-2013	Apanteles ensiger	A	Georgian Bay Islands National Park	museum voucher	Biodiversity Institute of Ontario	Collected from 19 Aug 2013 - 27 Aug 2013: 2 malaise traps combined (+GMP#01545)
CNCHZ	CNCHZ532-09	CAM0342	CAM0342	BOLD:ACE6783	CAM0342	656[1n]	2	JQ854818	0	0		0	Yes				29-May-2008	Apanteles ensiger	A			Canadian National Collection of Insects, Arachnids and Nematodes
CNCHZ	CNCHZ1095-09	MIC 000903	MIC 000903	BOLD:ACE6783	MIC 000903	657[0n]	2	JQ854909	0	0		0	Yes				17-Jul-2008	Apanteles ensiger	A			Canadian National Collection of Insects, Arachnids and Nematodes
CNPKJ	CNPKJ2122-14	BIOUG11707-A06	GMP#01510	BOLD:AAA3764	BIOUG11707-A06	597[0n]	1		0	0		0	No				26-Aug-2013	Apanteles ensiger	A	Pukaskwa National Park	museum voucher	Biodiversity Institute of Ontario	Collected from 19 Aug 2013 - 26 Aug 2013: 2 malaise traps combined (+GMP#01511)
CNCHY	ASWA308-08	HYM00001022	HYM00001022	BOLD:ACE6783	HYM00001022	657[0n]	2	JQ847860	0	0		0	Yes				11-Jun-2007	Apanteles ensiger	A			Canadian National Collection of Insects, Arachnids and Nematodes
CNSLS	CNSLS106-13	BIOUG06823-D09	GMP#00138	BOLD:AAA3764	BIOUG06823-D09	561[0n]	1		0	0		0	No				12-Aug-2012	Apanteles ensiger	A	Thousand Islands NP	museum voucher	Biodiversity Institute of Ontario	Collected from August 10 to 17 2012
SMTPD	SMTPD3777-13	BIOUG08647-C01	GMP#02168	BOLD:ACE6783	BIOUG08647-C01	555[0n]	1		0	0		0	No				27-Sep-2013	Apanteles ensiger	A	St. Marys, Little Falls Public School	museum voucher	Biodiversity Institute of Ontario	Collected from 23-Sept-13 to 27-Sept-244
CNCHZ	CNCHZ1102-09	MIC 000910	MIC 000910	BOLD:AAA3764	MIC 000910	657[0n]	2	JQ849706	0	0		0	Yes				16-Jul-2008	Apanteles ensiger	A			Canadian National Collection of Insects, Arachnids and Nematodes
CNCBM	CNCHZ1146-09	CAM0526	CAM0526	BOLD:AAA3764	CAM0526	657[0n]	2	JN639926	0	0		0	Yes					Apanteles ensiger	A			Canadian National Collection of Insects, Arachnids and Nematodes
CNCHX	CNCHX092-09	CAM0962	CAM0962	BOLD:ACE6783	CAM0962	623[0n]	2	HM430743	0	0		0	Yes				17-Jul-2008	Apanteles ensiger	A			Canadian National Collection of Insects, Arachnids and Nematodes
CNCHZ	CNCHZ685-09	MIC 000493	MIC 000493	BOLD:ACE6783	MIC 000493	657[0n]	2	JQ846968	0	0		0	Yes				23-Jul-2008	Apanteles ensiger	A			Canadian National Collection of Insects, Arachnids and Nematodes
CNWBH	CNWBH1210-13	BIOUG06549-D07	GMP#00437	BOLD:AAA3764	BIOUG06549-D07	589[0n]	1		0	0		0	No				05-Aug-2012	Apanteles ensiger	A	Wood Buffalo NP	museum voucher	Biodiversity Institute of Ontario	Collected from August 2 to 10 2012
CNPPC	CNPPC821-12	BIOUG03220-A01	GMP#00171	BOLD:AAA3764	BIOUG03220-A01	630[0n]	1	KJ089408	0	0		1	No				01-Jun-2012	Apanteles ensiger	A	Point Pelee NP	museum voucher	Biodiversity Institute of Ontario	Collected from May 30 to June 6 2012
CNCBM	CNCHZ480-09	CAM0290	CAM0290	BOLD:AAA3764	CAM0290	657[0n]	2	JN639914	0	0		0	Yes				26-Jul-2008	Apanteles ensiger	A			Canadian National Collection of Insects, Arachnids and Nematodes
CNCHZ	CNCHZ829-09	MIC 000637	MIC 000637	BOLD:AAA3764	MIC 000637	657[0n]	2	JQ848309	0	0		0	Yes				24-Jul-2007	Apanteles ensiger	A			Canadian National Collection of Insects, Arachnids and Nematodes
CNCHZ	CNCHZ201-09	CAM0011	CAM0011	BOLD:ACE6783	CAM0011	657[0n]	2	JQ851841	0	0		0	Yes				30-May-2007	Apanteles ensiger	A			Canadian National Collection of Insects, Arachnids and Nematodes
CNCHY	ASWA313-08	HYM00001027	HYM00001027	BOLD:ACE6783	HYM00001027	657[0n]	2	JQ847510	0	0		0	Yes				11-Jun-2007	Apanteles ensiger	A			Canadian National Collection of Insects, Arachnids and Nematodes
CNSLS	CNSLS119-13	BIOUG06823-E10	GMP#00138	BOLD:AAA3764	BIOUG06823-E10	580[0n]	1		0	0		0	No				12-Aug-2012	Apanteles ensiger	A	Thousand Islands NP	museum voucher	Biodiversity Institute of Ontario	Collected from August 10 to 17 2012
CNCHX	CNCHX069-09	CAM0939	CAM0939	BOLD:ACE6783	CAM0939	658[0n]	2	HM430720	0	0		0	Yes				17-Jul-2008	Apanteles ensiger	A			Canadian National Collection of Insects, Arachnids and Nematodes
CNPKJ	CNPKJ2479-14	BIOUG11771-G06	GMP#01510	BOLD:AAA3764	BIOUG11771-G06	594[0n]	1		0	0		0	No				26-Aug-2013	Apanteles ensiger	A	Pukaskwa National Park	museum voucher	Biodiversity Institute of Ontario	Collected from 19 Aug 2013 - 26 Aug 2013: 2 malaise traps combined (+GMP#01511)
MBIOE	MBIOE1290-13	BIOUG08748-E07	GMP#00958	BOLD:ACE6783	BIOUG08748-E07	579[0n]	1		0	0		0	No				27-Jun-2013	Apanteles ensiger	A	Biodiversity Institute of Ontario	museum voucher	Biodiversity Institute of Ontario	Collected June 20 - June 27, 2013.Very hot and sunny week, 24C on day of collection. Weekly min: 17C, max: 39C
CNCHZ	CNCHZ542-09	CAM0352	CAM0352	BOLD:ACE6783	CAM0352	657[0n]	2	JQ853826	0	0		0	Yes				29-May-2008	Apanteles ensiger	A			Canadian National Collection of Insects, Arachnids and Nematodes
CNCBM	CNCHZ638-09	CAM0448	CAM0448	BOLD:AAA3764	CAM0448	657[0n]	2	JN639920	0	0		0	Yes				01-Oct-2008	Apanteles ensiger	A			Canadian National Collection of Insects, Arachnids and Nematodes
MBIOK	MBIOK461-14	BIOUG09807-F11	GMP#02130	BOLD:ACE6783	BIOUG09807-F11	577[0n]	1		0	0		0	No				19-Sep-2013	Apanteles ensiger	A	Biodiversity Institute of Ontario	museum voucher	Biodiversity Institute of Ontario	Collected Sep 12-19, 2013. Mixed temperatures. Weekly min: 3C max: 36C
SSBAF	SSBAF2145-13	BIOUG06471-C10	L#12BIOBUS-1330	BOLD:AAA3764	BIOUG06471-C10	538[0n]	1		0	0		0	No				24-Jul-2012	Apanteles ensiger	A	Banff NP	museum voucher	Biodiversity Institute of Ontario	Collected from July 23-28
CNCHV	CNCHV264-10	CNCH3194	CNCH3194	BOLD:AAA3764	CNCH3194	658[0n]	2	HM397361	0	0		0	Yes				17-Jul-2009	Apanteles ensiger	A			Canadian National Collection of Insects, Arachnids and Nematodes
CNPPC	CNPPC885-12	BIOUG03220-F05	GMP#00171	BOLD:ACE6783	BIOUG03220-F05	630[0n]	1	KJ089777	0	0		1	No				01-Jun-2012	Apanteles ensiger	A	Point Pelee NP	museum voucher	Biodiversity Institute of Ontario	Collected from May 30 to June 6 2012
CNCBM	CNCHZ479-09	CAM0289	CAM0289	BOLD:AAA3764	CAM0289	657[0n]	2	JN639913	0	0		0	Yes				26-Jul-2008	Apanteles ensiger	A			Canadian National Collection of Insects, Arachnids and Nematodes
NCCC	NCCC165-11	BIOUG01657-F10	L#11NCC-02	BOLD:AAA3764	BIOUG01657-F10	658[0n]	2		0	0		0	No				06-Oct-2011	Apanteles ensiger	A	North Bear		Biodiversity Institute of Ontario	Collected Sept 20-Oct 6 2011
CNCHZ	CNCHZ534-09	CAM0344	CAM0344	BOLD:ACE6783	CAM0344	657[0n]	2	JQ847458	0	0		0	Yes				29-May-2008	Apanteles ensiger	A			Canadian National Collection of Insects, Arachnids and Nematodes
CNCBM	ASWA289-08	HYM00001003	HYM00001003	BOLD:AAA3764	HYM00001003	657[0n]	2	JN639910	0	0		0	Yes				15-Jun-2004	Apanteles ensiger	A			Canadian National Collection of Insects, Arachnids and Nematodes
CNCBM	CNCHZ1145-09	CAM0525	CAM0525	BOLD:AAA3764	CAM0525	657[0n]	2	JN639925	0	0		0	Yes					Apanteles ensiger	A			Canadian National Collection of Insects, Arachnids and Nematodes
SMTPD	SMTPD3455-13	BIOUG08643-F01	GMP#02170	BOLD:ACE6783	BIOUG08643-F01	531[0n]	1		0	0		0	No				27-Sep-2013	Apanteles ensiger	A	Whitby, Donald A. Wilson Secondary School	museum voucher	Biodiversity Institute of Ontario	Collected from 23-Sept-13 to 27-Sept-268
MHABR	MHABR090-09	MIC 000090			MIC 000090	144[0n]	2		0	0		0	No				15-Jun-1977	Apanteles ensiger	A			Canadian National Collection of Insects, Arachnids and Nematodes
CBRAE	JBHCI617-11	BIOUG00761-A09	L#10PROBE-0565	BOLD:AAA3764	BIOUG00761-A09	658[0n]	2	JN300489	0	0		1	Yes				31-Jul-2010	Apanteles ensiger	A			Biodiversity Institute of Ontario	sweep net collected by Paul Hebert sweep net ethanol
ASCON	ASWAY519-08	HYM00000665.2	HYM00000665.2		HYM00000665.2	87[3n]	2	GU141045	0	0		0	No				17-Aug-2006	Apanteles ensiger	A			Canadian National Collection of Insects, Arachnids and Nematodes	<VERBATIM LOCALITY>|Churchill (general coordinate)|58.78|-94.186|</VERBATIM LOCALITY>
MBIOL	MBIOL366-14	BIOUG09925-E09	GMP#02132	BOLD:ACE6783	BIOUG09925-E09	588[0n]	1		0	0		0	No				27-Sep-2013	Apanteles ensiger	A	Biodiversity Institute of Ontario	museum voucher	Biodiversity Institute of Ontario	Collected Sept 23-27, min temp: 4C, max temp: 40C
MHABR	MHABR084-09	MIC 000084			MIC 000084	144[0n]	4		0	0		0	No				24-Aug-1929	Apanteles ensiger	A			Canadian National Collection of Insects, Arachnids and Nematodes
NCCC	NCCC087-11	BIOUG01572-H03	L#11NCC-01	BOLD:AAA3764	BIOUG01572-H03	658[0n]	2		0	0		0	No				06-Oct-2011	Apanteles ensiger	A	Prairie Smoke		Biodiversity Institute of Ontario	Collected Sept 20-Oct 6 2011
CNCBM	CNCHZ304-09	CAM0114	CAM0114	BOLD:AAA3764	CAM0114	657[0n]	2	JN639907	0	0		0	Yes				10-Aug-2007	Apanteles ensiger	A			Canadian National Collection of Insects, Arachnids and Nematodes
CNPKO	CNPKO1368-14	BIOUG14107-D02	GMP#01512	BOLD:AAA3764	BIOUG14107-D02	561[0n]	1		0	0		0	No				01-Sep-2013	Apanteles ensiger		Pukaskwa National Park	museum voucher	Biodiversity Institute of Ontario	Collected from 26 Aug 2013 - 2 Sep 2013: 2 malaise traps combined (+GMP#01513)
CNCHZ	CNCHZ535-09	CAM0345	CAM0345	BOLD:ACE6783	CAM0345	657[0n]	2	JQ852610	0	0		0	Yes				29-May-2008	Apanteles ensiger	A			Canadian National Collection of Insects, Arachnids and Nematodes
CNCHX	CNCHX093-09	CAM0963	CAM0963	BOLD:ACE6783	CAM0963	658[0n]	2	HM430744	0	0		0	Yes				10-Jul-2008	Apanteles ensiger	A			Canadian National Collection of Insects, Arachnids and Nematodes
CNCBM	CNCHZ478-09	CAM0288	CAM0288	BOLD:AAA3764	CAM0288	657[0n]	2	JN639912	0	0		0	Yes				26-Jul-2008	Apanteles ensiger	A			Canadian National Collection of Insects, Arachnids and Nematodes
CNCHZ	CNCHZ531-09	CAM0341	CAM0341	BOLD:ACE6783	CAM0341	657[0n]	2	JQ853374	0	0		0	Yes				29-May-2008	Apanteles ensiger	A			Canadian National Collection of Insects, Arachnids and Nematodes
CNCHZ	CNCHZ296-09	CAM0106	CAM0106	BOLD:ACE6783	CAM0106	657[0n]	2	JQ850548	0	0		0	Yes				08-Sep-2007	Apanteles ensiger	A			Canadian National Collection of Insects, Arachnids and Nematodes
CNSLS	CNSLS115-13	BIOUG06823-E06	GMP#00138	BOLD:AAA3764	BIOUG06823-E06	589[0n]	1		0	0		0	No				12-Aug-2012	Apanteles ensiger	A	Thousand Islands NP	museum voucher	Biodiversity Institute of Ontario	Collected from August 10 to 17 2012
CNCHY	ASWA305-08	HYM00001019	HYM00001019	BOLD:ACE6783	HYM00001019	657[0n]	2	JQ848241	0	0		0	Yes				11-Jun-2007	Apanteles ensiger	A			Canadian National Collection of Insects, Arachnids and Nematodes
CNCBM	CNCHZ344-09	CAM0154	CAM0154	BOLD:AAA3764	CAM0154	657[0n]	2	JN639908	0	0		0	Yes				01-Sep-2007	Apanteles ensiger	A			Canadian National Collection of Insects, Arachnids and Nematodes
CNCHZ	CNCHZ530-09	CAM0340	CAM0340	BOLD:ACE6783	CAM0340	657[0n]	2	JQ846912	0	0		0	Yes				29-May-2008	Apanteles ensiger	A			Canadian National Collection of Insects, Arachnids and Nematodes
CNCHY	ASWA314-08	HYM00001028	HYM00001028	BOLD:ACE6783	HYM00001028	657[0n]	2	JQ846905	0	0		0	Yes				11-Jun-2007	Apanteles ensiger	A			Canadian National Collection of Insects, Arachnids and Nematodes
CNCHY	ASWA310-08	HYM00001024	HYM00001024	BOLD:ACE6783	HYM00001024	657[0n]	2	JQ854368	0	0		0	Yes				11-Jun-2007	Apanteles ensiger	A			Canadian National Collection of Insects, Arachnids and Nematodes
CNCBM	CNCHZ351-09	CAM0161	CAM0161	BOLD:AAA3764	CAM0161	657[0n]	2	JN639909	0	0		0	Yes				01-Sep-2007	Apanteles ensiger	A			Canadian National Collection of Insects, Arachnids and Nematodes
CNMIG	CNMIG236-14	BIOUG12486-D10	GMP#01104	BOLD:AAA3764	BIOUG12486-D10	579[0n]	1		0	0		0	No				06-Aug-2013	Apanteles ensiger		Mingan Archipelago National Park Reserve	museum voucher	Biodiversity Institute of Ontario	Collected from 30 Jul 2013 - 6 Aug 2013: B
BBHYN	BBHYN072-10	PCPP10-0466	L#10PCPP-0516	BOLD:AAA3764	PCPP10-0466	658[0n]	2	JN294307	0	0		1	Yes				23-Jun-2010	Apanteles ensiger	A	Point Pelee NP		Biodiversity Institute of Ontario
CNKJN	CNKJN622-14	BIOUG12736-B05	GMP#01274	BOLD:AAA3764	BIOUG12736-B05	564[0n]	1		0	0		0	No				18-Jul-2013	Apanteles ensiger	A	Kejimkujik National Park	museum voucher	Biodiversity Institute of Ontario	Collected from 11 Jul 2013 - 18 Jul 2013: 2 malaise traps combined (+GMP#01275)
BBHYH	BBHYH202-10	10BBHYM-1225	L#2010FL-118	BOLD:AAA3764	10BBHYM-1225	649[0n]	2	HQ930207	0	0		1	Yes				07-Mar-2010	Apanteles ensiger	A	Kissimmee Prairie Preserve SP		Biodiversity Institute of Ontario	Malaise Trap|Mar 4-7
CNCHY	ASWA290-08	HYM00001004	HYM00001004	BOLD:ACE6783	HYM00001004	657[0n]	2	JQ851222	0	0		0	Yes				11-Jun-2007	Apanteles ensiger	A			Canadian National Collection of Insects, Arachnids and Nematodes
CNCHZ	CNCHZ198-09	CAM0008	CAM0008	BOLD:ACE6783	CAM0008	657[0n]	2	JQ850383	0	0		0	Yes				19-Sep-2007	Apanteles ensiger	A			Canadian National Collection of Insects, Arachnids and Nematodes
MBIOE	MBIOE1410-13	BIOUG08799-G08	GMP#00958	BOLD:ACE6783	BIOUG08799-G08	594[0n]	1		0	0		0	No				27-Jun-2013	Apanteles ensiger	A	Biodiversity Institute of Ontario	museum voucher	Biodiversity Institute of Ontario	Collected June 20 - June 27, 2013.Very hot and sunny week, 24C on day of collection. Weekly min: 17C, max: 39C
CNCBM	CNCHZ1141-09	CAM0521	CAM0521	BOLD:AAA3764	CAM0521	657[0n]	2	JN639921	0	0		0	Yes					Apanteles ensiger	A			Canadian National Collection of Insects, Arachnids and Nematodes
CNSLK	CNSLK104-12	BIOUG04041-A02	GMP#00145	BOLD:AAA3764	BIOUG04041-A02	633[0n]	1		0	0		0	No				15-Sep-2012	Apanteles ensiger	A	Thousand Islands NP	museum voucher	Biodiversity Institute of Ontario	Collected from September 14 to 19 2012
CNSLI	CNSLI393-12	BIOUG03979-A07	GMP#00139	BOLD:AAA3764	BIOUG03979-A07	628[0n]	1		0	0		0	No				21-Aug-2012	Apanteles ensiger	A	Thousand Islands NP	museum voucher	Biodiversity Institute of Ontario	Collected from August 17 to 27 2012|Was collected on Mon. instead of Fri.
CNSLI	CNSLI402-12	BIOUG03979-B04	GMP#00139	BOLD:AAA3764	BIOUG03979-B04	628[0n]	1		0	0		0	No				21-Aug-2012	Apanteles ensiger	A	Thousand Islands NP	museum voucher	Biodiversity Institute of Ontario	Collected from August 17 to 27 2012|Was collected on Mon. instead of Fri.
ASGLF	ASGLF363-11	BIOUG00991-B03	MAS801-10	BOLD:AAA3764	BIOUG00991-B03	658[0n]	2	JQ852033	0	0		1	Yes				01-Aug-2010	Apanteles ensiger	A	Windy Bluff		Research Collection of M. Alex Smith
CNCHZ	CNCHZ356-09	CAM0166	CAM0166	BOLD:ACE6783	CAM0166	657[0n]	2	JQ848955	0	0		0	Yes				01-Sep-2007	Apanteles ensiger	A			Canadian National Collection of Insects, Arachnids and Nematodes
CNCHZ	CNCHZ293-09	CAM0103	CAM0103	BOLD:ACE6783	CAM0103	657[0n]	2	JQ849747	0	0		0	Yes				08-Sep-2007	Apanteles ensiger	A			Canadian National Collection of Insects, Arachnids and Nematodes
RBINA	RBINA1006-13	BIOUG07898-C04	ON13-C0056	BOLD:AAA3764	BIOUG07898-C04	588[0n]	1		0	0		0	No				15-Sep-2013	Apanteles ensiger	A	Rouge National Urban Park	museum voucher	Biodiversity Institute of Ontario	5 min sweep
MBION	MBION389-14	BIOUG09931-A07	GMP#02134	BOLD:ACE6783	BIOUG09931-A07	547[0n]	1		0	0		0	No				04-Oct-2013	Apanteles ensiger	A	Biodiversity Institute of Ontario	museum voucher	Biodiversity Institute of Ontario	Collected Sept 30 - Oct 4, sunny week, min temp: 7C, max temp: 39C
CNLMG	CNLMG1235-14	BIOUG12977-D11	GMP#01036	BOLD:AAA3764	BIOUG12977-D11	555[0n]	1		0	0		0	No				01-Aug-2013	Apanteles ensiger	A	La Mauricie National Park	museum voucher	Biodiversity Institute of Ontario	Collected from 24 Jul 2013 - 1 Aug 2013: 2 malaise traps combined (+GMP#01037): spider closed entrance: approx. 15% of catch lost
SMTPD	SMTPD3273-13	BIOUG08641-G07	GMP#02150	BOLD:ACE6783	BIOUG08641-G07	591[0n]	1		0	0		0	No				27-Sep-2013	Apanteles ensiger	A	Guelph, John F. Ross C.V.I.	museum voucher	Biodiversity Institute of Ontario	Collected from 23-Sept-13 to 27-Sept-206
HYCND	HYCND1817-11	CNCHYM 00107			CNCHYM 00107	0	0		0	0		1	No				07-Jun-1976	Apanteles ensiger	A			Canadian National Collection of Insects, Arachnids and Nematodes	N.C.D.A.
CNCHX	CNCHX068-09	CAM0938	CAM0938	BOLD:ACE6783	CAM0938	658[0n]	2	HM430719	0	0		0	Yes				18-Jul-2008	Apanteles ensiger	A			Canadian National Collection of Insects, Arachnids and Nematodes
CNCBM	CNCHZ538-09	CAM0348	CAM0348	BOLD:AAA3764	CAM0348	657[0n]	2	JN639916	0	0		0	Yes				29-May-2008	Apanteles ensiger	A			Canadian National Collection of Insects, Arachnids and Nematodes
SMTPD	SMTPD3831-13	BIOUG08647-G07	GMP#02168	BOLD:ACE6783	BIOUG08647-G07	564[0n]	1		0	0		1	No				27-Sep-2013	Apanteles ensiger	A	St. Marys, Little Falls Public School	museum voucher	Biodiversity Institute of Ontario	Collected from 23-Sept-13 to 27-Sept-190
CNSLI	CNSLI401-12	BIOUG03979-B03	GMP#00139	BOLD:AAA3764	BIOUG03979-B03	632[0n]	1		0	0		0	No				21-Aug-2012	Apanteles ensiger	A	Thousand Islands NP	museum voucher	Biodiversity Institute of Ontario	Collected from August 17 to 27 2012|Was collected on Mon. instead of Fri.
CNCHZ	CNCHZ536-09	CAM0346	CAM0346	BOLD:ACE6783	CAM0346	657[0n]	2	JQ847122	0	0		0	Yes				29-May-2008	Apanteles ensiger	A			Canadian National Collection of Insects, Arachnids and Nematodes
NCCC	NCCC726-11	BIOUG01795-D07	L#11NCC-08	BOLD:ACE6783	BIOUG01795-D07	658[0n]	2		0	0		0	No				05-Oct-2011	Apanteles ensiger	A	Scheck Nature Reserve	museum voucher	Biodiversity Institute of Ontario	Collected Sept 21-Oct 5 2011
CNPKK	CNPKK1009-14	BIOUG11996-F03	GMP#01514	BOLD:AAA3764	BIOUG11996-F03	531[0n]	1		0	0		0	No				09-Sep-2013	Apanteles ensiger	A	Pukaskwa National Park	museum voucher	Biodiversity Institute of Ontario	Collected from 2 Sep 2013 - 9 Sep 2013: 2 malaise traps combined (+GMP#01515)
CNKJE	CNKJE1961-14	BIOUG11597-E04	GMP#01270	BOLD:AAA3764	BIOUG11597-E04	549[0n]	1		0	0		0	No				11-Jul-2013	Apanteles ensiger	A	Kejimkujik National Park	museum voucher	Biodiversity Institute of Ontario	Collected from 5 Jul 2013 - 11 Jul 2013: 2 malaise traps combined (+GMP#01271)
CNCBM	CNCHZ635-09	CAM0445	CAM0445	BOLD:AAA3764	CAM0445	657[0n]	2	JN639917	0	0		0	Yes				01-Oct-2008	Apanteles ensiger	A			Canadian National Collection of Insects, Arachnids and Nematodes
RBINA	RBINA3743-13	BIOUG07903-F12	ON13-C0063	BOLD:AAA3764	BIOUG07903-F12	552[0n]	1		0	0		0	No				15-Sep-2013	Apanteles ensiger	A	Rouge National Urban Park	museum voucher	Biodiversity Institute of Ontario	Malaise trap
CNCBM	CNCHZ1147-09	CAM0527	CAM0527	BOLD:AAA3764	CAM0527	620[1n]	2	JN639927	0	0		0	Yes					Apanteles ensiger	A			Canadian National Collection of Insects, Arachnids and Nematodes
NCCC	NCCC130-11	BIOUG01657-C11	L#11NCC-02	BOLD:AAA3764	BIOUG01657-C11	658[0n]	2		0	0		0	No				06-Oct-2011	Apanteles ensiger	A	North Bear		Biodiversity Institute of Ontario	Collected Sept 20-Oct 6 2011
BBHYF	BBHYF031-10	09BBEHY-2030	L#09KC-117	BOLD:AAA3764		658[0n]	2	HQ929381	0	0		1	Yes				20-Aug-2009	Apanteles ensiger	A	Kouchibouguac NP		Biodiversity Institute of Ontario
CNROT	CNROT251-13	BIOUG09770-A04	GMP#01074	BOLD:AAA3764	BIOUG09770-A04	570[0n]	1		0	0		0	No				14-Sep-2013	Apanteles ensiger	A	Rouge National Urban Park	museum voucher	Biodiversity Institute of Ontario	Malaise 3-Sep-13 to 14-Sep-13: 2 traps combined (+GMP#01075)
CNCBM	CNCHZ1151-09	CAM0531	CAM0531	BOLD:AAA3764	CAM0531	657[0n]	2	JN639901	0	0		0	Yes					Apanteles ensiger	A			Canadian National Collection of Insects, Arachnids and Nematodes
CNCHZ	CNCHZ197-09	CAM0007	CAM0007	BOLD:ACE6783	CAM0007	657[0n]	2	JQ849082	0	0		0	Yes				19-Sep-2007	Apanteles ensiger	A			Canadian National Collection of Insects, Arachnids and Nematodes
CNMIG	CNMIG324-14	BIOUG12487-D03	GMP#01104	BOLD:AAA3764	BIOUG12487-D03	594[0n]	1		0	0		0	No				06-Aug-2013	Apanteles ensiger		Mingan Archipelago National Park Reserve	museum voucher	Biodiversity Institute of Ontario	Collected from 30 Jul 2013 - 6 Aug 2013: B
MHABR	MHABR086-09	MIC 000086			MIC 000086	144[0n]	2		0	0		0	No				24-Jul-1956	Apanteles ensiger	A			Canadian National Collection of Insects, Arachnids and Nematodes
ASGLE	ASGLE690-10	ASGLE-0880	MAS997-09	BOLD:AAA3764	ASGLE-0880	658[0n]	2	JQ847673	0	0		1	Yes				01-Nov-2009	Apanteles ensiger	A	25 Division St.		Research Collection of M. Alex Smith
CNSLJ	CNSLJ045-12	BIOUG03887-F12	GMP#00141	BOLD:AAA3764	BIOUG03887-F12	621[0n]	1		0	0		0	No				02-Sep-2012	Apanteles ensiger	A	Thousand Islands NP	museum voucher	Biodiversity Institute of Ontario	Collected from August 31 to September 7 2012
SMTPD	SMTPD4966-13	BIOUG08665-D12	GMP#02164	BOLD:ACE6783	BIOUG08665-D12	555[0n]	1		0	0		0	No				27-Sep-2013	Apanteles ensiger	A	Paris, Holy Family School	museum voucher	Biodiversity Institute of Ontario	Collected from 23-Sept-13 to 27-Sept-175
MBIOI	MBIOI1222-13	BIOUG09515-E11	GMP#00966	BOLD:ACE6783	BIOUG09515-E11	594[0n]	1		0	0		0	No				22-Aug-2013	Apanteles ensiger	A	Biodiversity Institute of Ontario	museum voucher	Biodiversity Institute of Ontario	Collected Aug 15-22, 2013. Hot, sunny week. Weekly min: 9C max: 40C
CNCBM	CNCHZ212-09	CAM0022	CAM0022	BOLD:AAA3764	CAM0022	657[0n]	2	JN639903	0	0		0	Yes				13-Jul-2007	Apanteles ensiger	A			Canadian National Collection of Insects, Arachnids and Nematodes
CNCBM	CNCHZ636-09	CAM0446	CAM0446	BOLD:AAA3764	CAM0446	657[0n]	2	JN639918	0	0		0	Yes				01-Oct-2008	Apanteles ensiger	A			Canadian National Collection of Insects, Arachnids and Nematodes
JSAUG	JSAUG1440-11	BIOUG01631-A09	L#11JSETM-018	BOLD:AAA3764		658[0n]	2		0	0		0	Yes				18-Aug-2011	Apanteles ensiger	A			Biodiversity Institute of Ontario
ASCNC	ASCNC020-09	CAM0635	CAM0635	BOLD:AAA3764	CAM0635	658[0n]	2	JQ849909	0	0		0	Yes				12-Aug-2007	Apanteles ensiger	A			Canadian National Collection of Insects, Arachnids and Nematodes
CNCBM	CNCHZ525-09	CAM0335	CAM0335	BOLD:AAA3764	CAM0335	657[0n]	2	JN639915	0	0		0	Yes				29-May-2008	Apanteles ensiger	A			Canadian National Collection of Insects, Arachnids and Nematodes
WOMIA	WOMIA340-11	GOU 0570	GOU 0570	BOLD:ACE6783	GOU 0570	658[0n]	2	JN282151	0	0		0	Yes				04-Aug-2009	Apanteles ensiger	A			Canadian National Collection of Insects, Arachnids and Nematodes
RBINA	RBINA3620-13	BIOUG07902-D08	ON13-C0063	BOLD:AAA3764	BIOUG07902-D08	564[0n]	1		0	0		0	No				15-Sep-2013	Apanteles ensiger	A	Rouge National Urban Park	museum voucher	Biodiversity Institute of Ontario	Malaise trap
CNCHY	ASWA312-08	HYM00001026	HYM00001026	BOLD:ACE6783	HYM00001026	657[0n]	2	JQ849976	0	0		0	Yes				11-Jun-2007	Apanteles ensiger	A			Canadian National Collection of Insects, Arachnids and Nematodes
CNCBM	CNCHZ1143-09	CAM0523	CAM0523	BOLD:AAA3764	CAM0523	657[0n]	2	JN639923	0	0		0	Yes					Apanteles ensiger	A			Canadian National Collection of Insects, Arachnids and Nematodes
CNCHZ	CNCHZ546-09	CAM0356	CAM0356	BOLD:ACE6783	CAM0356	657[0n]	2	JQ849042	0	0		0	Yes				29-May-2008	Apanteles ensiger	A			Canadian National Collection of Insects, Arachnids and Nematodes
CNCHW	CNCHW328-09	CNCH1358	CNCH1358	BOLD:AAA3764	CNCH1358	538[0n]	3	HM397501	0	0		0	Yes				08-Jun-2003	Apanteles ensiger	A			Canadian National Collection of Insects, Arachnids and Nematodes
MHABR	MHABR083-09	MIC 000083			MIC 000083	144[0n]	4		0	0		0	No				09-Jun-1939	Apanteles ensiger	A			Canadian National Collection of Insects, Arachnids and Nematodes
CNLMG	CNLMG1225-14	BIOUG12977-D01	GMP#01036	BOLD:AAA3764	BIOUG12977-D01	579[0n]	1		0	0		0	No				01-Aug-2013	Apanteles ensiger	A	La Mauricie National Park	museum voucher	Biodiversity Institute of Ontario	Collected from 24 Jul 2013 - 1 Aug 2013: 2 malaise traps combined (+GMP#01037): spider closed entrance: approx. 15% of catch lost
CNGBN	CNGBN1394-14	BIOUG11331-F04	GMP#01542	BOLD:AAA3764	BIOUG11331-F04	567[0n]	1		0	0		0	No				19-Aug-2013	Apanteles ensiger	A	Georgian Bay Islands National Park	museum voucher	Biodiversity Institute of Ontario	Collected from 06 Aug 2013 - 19 Aug 2013: 2 malaise traps combined (+GMP#01543)
CNSLI	CNSLI089-12	BIOUG03863-G08	GMP#00139	BOLD:AAA3764	BIOUG03863-G08	633[0n]	1		0	0		0	No				21-Aug-2012	Apanteles ensiger	A	Thousand Islands NP	museum voucher	Biodiversity Institute of Ontario	Collected from August 17 to 27 2012|Was collected on Mon. instead of Fri.
CNROS	CNROS484-13	BIOUG09765-B03	GMP#01070	BOLD:AAA3764	BIOUG09765-B03	594[0n]	1		0	0		0	No				27-Aug-2013	Apanteles ensiger	A	Rouge National Urban Park	museum voucher	Biodiversity Institute of Ontario	Malaise 20-Aug-13 to 27-Aug-13: 2 traps combined (+GMP#01071)
CNCHZ	CNCHZ600-09	CAM0410	CAM0410	BOLD:ACE6783	CAM0410	657[0n]	2	JQ852825	0	0		0	Yes				04-Jun-2008	Apanteles ensiger	A			Canadian National Collection of Insects, Arachnids and Nematodes
CNCHZ	CNCHZ303-09	CAM0113	CAM0113	BOLD:ACE6783	CAM0113	657[0n]	2	JQ846608	0	0		0	Yes				10-Aug-2007	Apanteles ensiger	A			Canadian National Collection of Insects, Arachnids and Nematodes
CNCHX	CNCHX802-09	WMIC 0517	WMIC 0517	BOLD:ACE6783	WMIC 0517	658[0n]	2	HM431080	0	0		0	Yes				07-Jul-2003	Apanteles ensiger	A			Canadian National Collection of Insects, Arachnids and Nematodes
CNPKK	CNPKK1294-14	BIOUG11999-F03	GMP#01514	BOLD:AAA3764	BIOUG11999-F03	525[0n]	1		0	0		0	No				09-Sep-2013	Apanteles ensiger	A	Pukaskwa National Park	museum voucher	Biodiversity Institute of Ontario	Collected from 2 Sep 2013 - 9 Sep 2013: 2 malaise traps combined (+GMP#01515)
CBRAE	JBHCI247-11	BIOUG00726-B07	L#10PROBE-0469	BOLD:AAA3764	BIOUG00726-B07	658[0n]	2	JN300271	0	0		1	Yes				29-Jul-2010	Apanteles ensiger	A			Biodiversity Institute of Ontario	sweep net grasses and willows sweep net ethanol
CNCHZ	CNCHZ341-09	CAM0151	CAM0151	BOLD:ACE6783	CAM0151	657[0n]	2	JQ853698	0	0		0	Yes				01-Sep-2007	Apanteles ensiger	A			Canadian National Collection of Insects, Arachnids and Nematodes
CNCBM	CNCHZ1144-09	CAM0524	CAM0524	BOLD:AAA3764	CAM0524	632[0n]	1	JN639924	0	0		0	No					Apanteles ensiger	A			Canadian National Collection of Insects, Arachnids and Nematodes
CNSLE	CNSLE365-12	BIOUG03123-B05	GMP#00133	BOLD:AAA3764	BIOUG03123-B05	631[0n]	1		0	0		0	No				24-Jun-2012	Apanteles ensiger	A	Thousand Islands NP		Biodiversity Institute of Ontario	Collected from June 22-29 2012
CNCHZ	CNCHZ203-09	CAM0013	CAM0013	BOLD:ACE6783	CAM0013	657[0n]	2	JQ847378	0	0		0	Yes				30-May-2007	Apanteles ensiger	A			Canadian National Collection of Insects, Arachnids and Nematodes
MHABR	MHABR082-09	MIC 000082			MIC 000082	144[0n]	4		0	0		0	No				20-Jun-1947	Apanteles ensiger	A			Canadian National Collection of Insects, Arachnids and Nematodes
CNPKO	CNPKO2958-14	BIOUG14171-B01	GMP#01512	BOLD:AAA3764	BIOUG14171-B01	595[0n]	1		0	0		0	No				01-Sep-2013	Apanteles ensiger		Pukaskwa National Park	museum voucher	Biodiversity Institute of Ontario	Collected from 26 Aug 2013 - 2 Sep 2013: 2 malaise traps combined (+GMP#01513)
CNCHX	CNCHX072-09	CAM0942	CAM0942	BOLD:ACE6783	CAM0942	637[0n]	2	HM430723	0	0		0	Yes				18-Jul-2008	Apanteles ensiger	A			Canadian National Collection of Insects, Arachnids and Nematodes
MBIOK	MBIOK076-14	BIOUG09803-F06	GMP#02130	BOLD:ACE6783	BIOUG09803-F06	597[0n]	1		0	0		0	No				19-Sep-2013	Apanteles ensiger	A	Biodiversity Institute of Ontario	museum voucher	Biodiversity Institute of Ontario	Collected Sep 12-19, 2013. Mixed temperatures. Weekly min: 3C max: 36C
CNSLQ	CNSLQ251-13	BIOUG07004-C04	GMP#00143	BOLD:AAA3764	BIOUG07004-C04	546[0n]	1		0	0		0	No				15-Jul-2012	Apanteles ensiger	A	Thousand Islands NP	museum voucher	Biodiversity Institute of Ontario	Collected from July 13 to 20 2012
CNCBM	CNCHZ1149-09	CAM0529	CAM0529	BOLD:AAA3764	CAM0529	657[0n]	2	JN639899	0	0		0	Yes					Apanteles ensiger	A			Canadian National Collection of Insects, Arachnids and Nematodes
CNCBM	CNCHZ264-09	CAM0074	CAM0074	BOLD:AAA3764	CAM0074	657[0n]	2	JN639906	0	0		0	Yes				26-Jun-2007	Apanteles ensiger	A			Canadian National Collection of Insects, Arachnids and Nematodes
CNSLS	CNSLS117-13	BIOUG06823-E08	GMP#00138	BOLD:AAA3764	BIOUG06823-E08	589[0n]	1		0	0		0	No				12-Aug-2012	Apanteles ensiger	A	Thousand Islands NP	museum voucher	Biodiversity Institute of Ontario	Collected from August 10 to 17 2012
SMTPD	SMTPD4929-13	BIOUG08665-A11	GMP#02164	BOLD:ACE6783	BIOUG08665-A11	537[0n]	1		0	0		0	No				27-Sep-2013	Apanteles ensiger	A	Paris, Holy Family School	museum voucher	Biodiversity Institute of Ontario	Collected from 23-Sept-13 to 27-Sept-237
JSSEP	JSSEP758-11	BIOUG01631-G11	L#11JSETM-021	BOLD:AAA3764		658[0n]	2		0	0		0	Yes				14-Sep-2011	Apanteles ensiger	A			Biodiversity Institute of Ontario	Sep 9-20, 2011
CNLMG	CNLMG906-14	BIOUG12974-A03	GMP#01036	BOLD:AAA3764	BIOUG12974-A03	564[0n]	1		0	0		0	No				01-Aug-2013	Apanteles ensiger	A	La Mauricie National Park	museum voucher	Biodiversity Institute of Ontario	Collected from 24 Jul 2013 - 1 Aug 2013: 2 malaise traps combined (+GMP#01037): spider closed entrance: approx. 15% of catch lost
CNCBM	CNCHZ637-09	CAM0447	CAM0447	BOLD:AAA3764	CAM0447	657[0n]	2	JN639919	0	0		0	Yes				01-Oct-2008	Apanteles ensiger	A			Canadian National Collection of Insects, Arachnids and Nematodes
JSAUG	JSAUG449-11	BIOUG01597-F04	L#11JSETM-018	BOLD:AAA3764		658[0n]	2		0	0		0	Yes				18-Aug-2011	Apanteles ensiger	A		museum voucher	Biodiversity Institute of Ontario	Aug 14-23, 2011
SMTPD	SMTPD3789-13	BIOUG08647-D01	GMP#02168	BOLD:ACE6783	BIOUG08647-D01	588[0n]	1		0	0		0	No				27-Sep-2013	Apanteles ensiger	A	St. Marys, Little Falls Public School	museum voucher	Biodiversity Institute of Ontario	Collected from 23-Sept-13 to 27-Sept-232
NCCC	NCCC157-11	BIOUG01657-F02	L#11NCC-02	BOLD:AAA3764	BIOUG01657-F02	658[0n]	2		0	0		0	No				06-Oct-2011	Apanteles ensiger	A	North Bear		Biodiversity Institute of Ontario	Collected Sept 20-Oct 6 2011
CNROS	CNROS481-13	BIOUG09765-A12	GMP#01070	BOLD:AAA3764	BIOUG09765-A12	600[0n]	1		0	0		0	No				27-Aug-2013	Apanteles ensiger	A	Rouge National Urban Park	museum voucher	Biodiversity Institute of Ontario	Malaise 20-Aug-13 to 27-Aug-13: 2 traps combined (+GMP#01071)
CNSLJ	CNSLJ189-12	BIOUG03979-H08	GMP#00141	BOLD:AAA3764	BIOUG03979-H08	632[0n]	1		0	0		0	No				02-Sep-2012	Apanteles ensiger	A	Thousand Islands NP	museum voucher	Biodiversity Institute of Ontario	Collected from August 31 to September 7 2012
CNCHZ	CNCHZ540-09	CAM0350	CAM0350	BOLD:ACE6783	CAM0350	657[0n]	2	JQ851358	0	0		0	Yes				29-May-2008	Apanteles ensiger	A			Canadian National Collection of Insects, Arachnids and Nematodes
CNPPJ	CNPPJ1314-12	BIOUG03931-F01	GMP#00185	BOLD:ACE6783	BIOUG03931-F01	634[0n]	1	KJ208980	0	0		0	No				07-Sep-2012	Apanteles ensiger	A	Point Pelee NP	museum voucher	Biodiversity Institute of Ontario	Collected from September 5 to 12 2012
MBION	MBION369-14	BIOUG09930-G10	GMP#02134	BOLD:ACE6783	BIOUG09930-G10	587[0n]	1		0	0		0	No				04-Oct-2013	Apanteles ensiger	A	Biodiversity Institute of Ontario	museum voucher	Biodiversity Institute of Ontario	Collected Sept 30 - Oct 4, sunny week, min temp: 7C, max temp: 39C
SMTPD	SMTPD3941-13	BIOUG08648-H10	GMP#02168	BOLD:ACE6783	BIOUG08648-H10	576[0n]	1		0	0		0	No				27-Sep-2013	Apanteles ensiger	A	St. Marys, Little Falls Public School	museum voucher	Biodiversity Institute of Ontario	Collected from 23-Sept-13 to 27-Sept-277
CNROJ	CNROJ908-13	BIOUG08752-A08	GMP#01072	BOLD:AAA3764	BIOUG08752-A08	594[0n]	1		0	0		0	No				03-Sep-2013	Apanteles ensiger	A	Rouge National Urban Park	museum voucher	Biodiversity Institute of Ontario	Malaise 27-Aug-13 to 3-Sep-13: 2 traps combined (+GMP#01073)
CNMIG	CNMIG1286-14	BIOUG12497-F12	GMP#01105	BOLD:AAA3764	BIOUG12497-F12	585[0n]	1		0	0		0	No				06-Aug-2013	Apanteles ensiger		Mingan Archipelago National Park Reserve	museum voucher	Biodiversity Institute of Ontario	Collected from 30 Jul 2013 - 6 Aug 2013: A
SMTPD	SMTPD4980-13	BIOUG08665-F02	GMP#02164	BOLD:ACE6783	BIOUG08665-F02	582[0n]	1		0	0		0	No				27-Sep-2013	Apanteles ensiger	A	Paris, Holy Family School	museum voucher	Biodiversity Institute of Ontario	Collected from 23-Sept-13 to 27-Sept-189
MBION	MBION341-14	BIOUG09930-E06	GMP#02134	BOLD:ACE6783	BIOUG09930-E06	572[0n]	1		0	0		0	No				04-Oct-2013	Apanteles ensiger	A	Biodiversity Institute of Ontario	museum voucher	Biodiversity Institute of Ontario	Collected Sept 30 - Oct 4, sunny week, min temp: 7C, max temp: 39C
CNCHZ	CNCHZ310-09	CAM0120	CAM0120	BOLD:ACE6783	CAM0120	657[0n]	2	JQ850949	0	0		0	Yes				30-Jul-2007	Apanteles ensiger	A			Canadian National Collection of Insects, Arachnids and Nematodes
NCCC	NCCC249-11	BIOUG01661-E11	L#11NCC-02	BOLD:AAA3764	BIOUG01661-E11	658[0n]	2		0	0		0	No				06-Oct-2011	Apanteles ensiger	A	North Bear		Biodiversity Institute of Ontario	Collected Sept 20-Oct 6 2011
CNROS	CNROS475-13	BIOUG09765-A06	GMP#01070	BOLD:AAA3764	BIOUG09765-A06	585[0n]	1		0	0		0	No				27-Aug-2013	Apanteles ensiger	A	Rouge National Urban Park	museum voucher	Biodiversity Institute of Ontario	Malaise 20-Aug-13 to 27-Aug-13: 2 traps combined (+GMP#01071)
CNCHZ	CNCHZ579-09	CAM0389	CAM0389	BOLD:ACE6783	CAM0389	657[0n]	2	JQ847817	0	0		0	Yes				03-Jun-2008	Apanteles ensiger	A			Canadian National Collection of Insects, Arachnids and Nematodes
CNCHY	ASWA306-08	HYM00001020	HYM00001020	BOLD:ACE6783	HYM00001020	657[0n]	2	JQ852077	0	0		0	Yes				11-Jun-2007	Apanteles ensiger	A			Canadian National Collection of Insects, Arachnids and Nematodes
CNCBM	CNCHZ476-09	CAM0286	CAM0286	BOLD:AAA3764	CAM0286	657[0n]	2	JN639911	0	0		0	Yes				26-Jul-2008	Apanteles ensiger	A			Canadian National Collection of Insects, Arachnids and Nematodes
CNCHZ	CNCHZ353-09	CAM0163	CAM0163	BOLD:ACE6783	CAM0163	657[0n]	2	JQ850920	0	0		0	Yes				01-Sep-2007	Apanteles ensiger	A			Canadian National Collection of Insects, Arachnids and Nematodes
CNCHZ	CNCHZ541-09	CAM0351	CAM0351	BOLD:ACE6783	CAM0351	657[0n]	2	JQ847207	0	0		0	Yes				29-May-2008	Apanteles ensiger	A			Canadian National Collection of Insects, Arachnids and Nematodes
TDWGB	TDWGB248-10	TDWG-0384	L#2010WH-0144	BOLD:ACE6783	TDWG-0384	658[0n]	2	HQ978839	0	0		1	Yes				29-Sep-2010	Apanteles ensiger	A			Biodiversity Institute of Ontario	Freehand Sampling 10TDWG-0019
CNCHZ	CNCHZ603-09	CAM0413	CAM0413	BOLD:ACE6783	CAM0413	657[0n]	2	JQ850557	0	0		0	Yes				03-Jun-2008	Apanteles ensiger	A			Canadian National Collection of Insects, Arachnids and Nematodes
CNSLS	CNSLS104-13	BIOUG06823-D07	GMP#00138	BOLD:AAA3764	BIOUG06823-D07	589[0n]	1		0	0		0	No				12-Aug-2012	Apanteles ensiger	A	Thousand Islands NP	museum voucher	Biodiversity Institute of Ontario	Collected from August 10 to 17 2012
HYCND	HYCND1816-11	CNCHYM 00106			CNCHYM 00106	406[1n]	2	JQ848852	0	0		1	No				08-Oct-1970	Apanteles ensiger	A			Canadian National Collection of Insects, Arachnids and Nematodes
SMTPD	SMTPD1460-13	BIOUG08499-C11	GMP#02142	BOLD:ACE6783	BIOUG08499-C11	555[0n]	1		0	0		0	No				27-Sep-2013	Apanteles ensiger	A	Teeswater, Sacred Heart School	museum voucher	Biodiversity Institute of Ontario	Collected from 23-Sept-13 to 27-Sept-270
CNCHZ	CNCHZ550-09	CAM0360	CAM0360	BOLD:ACE6783	CAM0360	657[0n]	2	JQ847223	0	0		0	Yes				29-May-2008	Apanteles ensiger	A			Canadian National Collection of Insects, Arachnids and Nematodes
CNCHZ	CNCHZ539-09	CAM0349	CAM0349	BOLD:ACE6783	CAM0349	657[0n]	2	JQ854852	0	0		0	Yes				29-May-2008	Apanteles ensiger	A			Canadian National Collection of Insects, Arachnids and Nematodes
CNCHZ	CNCHZ305-09	CAM0115	CAM0115	BOLD:ACE6783	CAM0115	657[0n]	2	JQ851646	0	0		0	Yes				10-Aug-2007	Apanteles ensiger	A			Canadian National Collection of Insects, Arachnids and Nematodes
MHABR	MHABR085-09	MIC 000085			MIC 000085	0	2		0	0		0	No				09-Jun-1944	Apanteles ensiger	A			Canadian National Collection of Insects, Arachnids and Nematodes
CNSLJ	CNSLJ175-12	BIOUG03979-G06	GMP#00141	BOLD:AAA3764	BIOUG03979-G06	630[0n]	1		0	0		0	No				02-Sep-2012	Apanteles ensiger	A	Thousand Islands NP	museum voucher	Biodiversity Institute of Ontario	Collected from August 31 to September 7 2012
CNCHX	CNCHX094-09	CAM0964	CAM0964	BOLD:ACE6783	CAM0964	658[0n]	2	HM430745	0	0		0	Yes				10-Jul-2008	Apanteles ensiger	A			Canadian National Collection of Insects, Arachnids and Nematodes
CNCBM	CNCHZ215-09	CAM0025	CAM0025	BOLD:AAA3764	CAM0025	657[0n]	2	JN639905	0	0		0	Yes				30-Jul-2007	Apanteles ensiger	A			Canadian National Collection of Insects, Arachnids and Nematodes
MHABR	MHABR088-09	MIC 000088			MIC 000088	143[1n]	6		0	0		0	No				21-Jul-1975	Apanteles ensiger	A			Canadian National Collection of Insects, Arachnids and Nematodes
MBIOE	MBIOE2286-13	BIOUG08807-A09	GMP#00958	BOLD:ACE6783	BIOUG08807-A09	577[4n]	1		0	0		0	No				27-Jun-2013	Apanteles ensiger	A	Biodiversity Institute of Ontario	museum voucher	Biodiversity Institute of Ontario	Collected June 20 - June 27, 2013.Very hot and sunny week, 24C on day of collection. Weekly min: 17C, max: 39C
CNCHZ	CNCHZ291-09	CAM0101	CAM0101	BOLD:ACE6783	CAM0101	657[0n]	2	JQ852879	0	0		0	Yes				08-Sep-2007	Apanteles ensiger	A			Canadian National Collection of Insects, Arachnids and Nematodes
MBIOL	MBIOL370-14	BIOUG09925-F01	GMP#02132	BOLD:ACE6783	BIOUG09925-F01	580[0n]	1		0	0		0	No				27-Sep-2013	Apanteles ensiger	A	Biodiversity Institute of Ontario	museum voucher	Biodiversity Institute of Ontario	Collected Sept 23-27, min temp: 4C, max temp: 40C
MBIOH	MBIOH323-13	BIOUG09345-D07	GMP#00964	BOLD:ACE6783	BIOUG09345-D07	596[0n]	1		0	0		0	No				08-Aug-2013	Apanteles ensiger	A	Biodiversity Institute of Ontario	museum voucher	Biodiversity Institute of Ontario	Collected Aug 1-8, 2013. Mostly sunny with some rain, 23C on day of collection. Weekly min: 9C max: 33C
MBIOL	MBIOL310-14	BIOUG09925-A01	GMP#02132	BOLD:ACE6783	BIOUG09925-A01	590[0n]	1		0	0		0	No				27-Sep-2013	Apanteles ensiger	A	Biodiversity Institute of Ontario	museum voucher	Biodiversity Institute of Ontario	Collected Sept 23-27, min temp: 4C, max temp: 40C
CNLMP	CNLMP1391-14	BIOUG14261-G11	GMP#01034	BOLD:AAA3764	BIOUG14261-G11	555[0n]	1		0	0		0	No				23-Jul-2013	Apanteles ensiger	A	La Mauricie National Park	museum voucher	Biodiversity Institute of Ontario	Collected from 17 Jul 2013 - 24 Jul 2013: 2 malaise traps combined (+GMP#01035)
CNCHZ	CNCHZ252-09	CAM0062	CAM0062	BOLD:ACE6783	CAM0062	657[0n]	2	JQ850707	0	0		0	Yes				26-Jun-2007	Apanteles ensiger	A			Canadian National Collection of Insects, Arachnids and Nematodes
SMTPD	SMTPD4964-13	BIOUG08665-D10	GMP#02164	BOLD:ACE6783	BIOUG08665-D10	549[0n]	1		0	0		0	No				27-Sep-2013	Apanteles ensiger	A	Paris, Holy Family School	museum voucher	Biodiversity Institute of Ontario	Collected from 23-Sept-13 to 27-Sept-173
CNCHZ	CNCHZ266-09	CAM0076	CAM0076	BOLD:ACE6783	CAM0076	657[0n]	2	JQ850823	0	0		0	Yes				26-Jun-2007	Apanteles ensiger	A			Canadian National Collection of Insects, Arachnids and Nematodes
CNPKJ	CNPKJ2482-14	BIOUG11771-G09	GMP#01510	BOLD:AAA3764	BIOUG11771-G09	582[0n]	1		0	0		0	No				26-Aug-2013	Apanteles ensiger	A	Pukaskwa National Park	museum voucher	Biodiversity Institute of Ontario	Collected from 19 Aug 2013 - 26 Aug 2013: 2 malaise traps combined (+GMP#01511)
MBIOK	MBIOK431-14	BIOUG09807-D05	GMP#02130	BOLD:ACE6783	BIOUG09807-D05	559[0n]	1		0	0		0	No				19-Sep-2013	Apanteles ensiger	A	Biodiversity Institute of Ontario	museum voucher	Biodiversity Institute of Ontario	Collected Sep 12-19, 2013. Mixed temperatures. Weekly min: 3C max: 36C
CNCBM	CNCHZ1150-09	CAM0530	CAM0530	BOLD:AAA3764	CAM0530	657[0n]	2	JN639900	0	0		0	Yes					Apanteles ensiger	A			Canadian National Collection of Insects, Arachnids and Nematodes
CNCHY	ASWA307-08	HYM00001021	HYM00001021	BOLD:ACE6783	HYM00001021	657[0n]	2	JQ849917	0	0		0	Yes				11-Jun-2007	Apanteles ensiger	A			Canadian National Collection of Insects, Arachnids and Nematodes
CNCBM	CNCHZ1148-09	CAM0528	CAM0528	BOLD:AAA3764	CAM0528	657[0n]	2	JN639928	0	0		0	Yes					Apanteles ensiger	A			Canadian National Collection of Insects, Arachnids and Nematodes
BBHYJ	BBHYJ345-10	10BBCHY-1304	L#PC2010PA-182	BOLD:AAA3764	10BBCHY-1304	658[0n]	2	JN292962	0	0		1	Yes				13-Aug-2010	Apanteles ensiger	A	Prince Albert NP		Biodiversity Institute of Ontario
CNCHX	CNCHX1040-09	CNCH1025	CNCH1025	BOLD:ACE6783	CNCH1025	639[0n]	2	HM430792	0	0		0	Yes				06-Jul-2009	Apanteles ensiger	A			Canadian National Collection of Insects, Arachnids and Nematodes
CNCHZ	CNCHZ589-09	CAM0399	CAM0399	BOLD:ACE6783	CAM0399	657[0n]	2	JQ851077	0	0		0	Yes				03-Jun-2008	Apanteles ensiger	A			Canadian National Collection of Insects, Arachnids and Nematodes
RBINA	RBINA3618-13	BIOUG07902-D06	ON13-C0063	BOLD:AAA3764	BIOUG07902-D06	579[0n]	1		0	0		0	No				15-Sep-2013	Apanteles ensiger	A	Rouge National Urban Park	museum voucher	Biodiversity Institute of Ontario	Malaise trap
MHABR	MHABR089-09	MIC 000089			MIC 000089	144[0n]	2		0	0		0	No				15-Aug-1976	Apanteles ensiger	A			Canadian National Collection of Insects, Arachnids and Nematodes
JSAUG	JSAUG1436-11	BIOUG01631-A05	L#11JSETM-018	BOLD:AAA3764		658[0n]	2		0	0		0	Yes				18-Aug-2011	Apanteles ensiger	A			Biodiversity Institute of Ontario
CNCHX	CNCHX071-09	CAM0941	CAM0941	BOLD:ACE6783	CAM0941	658[0n]	2	HM430722	0	0		0	Yes				17-Jul-2008	Apanteles ensiger	A			Canadian National Collection of Insects, Arachnids and Nematodes
CNCHX	CNCHX091-09	CAM0961	CAM0961	BOLD:ACE6783	CAM0961	658[0n]	2	HM430742	0	0		0	Yes				10-Jul-2008	Apanteles ensiger	A			Canadian National Collection of Insects, Arachnids and Nematodes
CNGBJ	CNGBJ1514-14	BIOUG10641-G12	GMP#01526	BOLD:ACE6783	BIOUG10641-G12	597[0n]	1		0	0		0	No				23-May-2013	Apanteles ensiger	A	Georgian Bay Islands National Park	museum voucher	Biodiversity Institute of Ontario	Collected from 12 May 2013 - 23 May 2013: 2 malaise traps combined (+GMP#01527)
MBIOI	MBIOI1284-13	BIOUG09631-C02	GMP#00966	BOLD:ACE6783	BIOUG09631-C02	585[0n]	1		0	0		0	No				22-Aug-2013	Apanteles ensiger	A	Biodiversity Institute of Ontario	museum voucher	Biodiversity Institute of Ontario	Collected Aug 15-22, 2013. Hot, sunny week. Weekly min: 9C max: 40C
CNPKO	CNPKO652-14	BIOUG14099-G10	GMP#01512	BOLD:AAA3764	BIOUG14099-G10	588[0n]	1		0	0		0	No				01-Sep-2013	Apanteles ensiger		Pukaskwa National Park	museum voucher	Biodiversity Institute of Ontario	Collected from 26 Aug 2013 - 2 Sep 2013: 2 malaise traps combined (+GMP#01513)
CNKJF	CNKJF1651-14	BIOUG11758-F08	GMP#01276	BOLD:AAA3764	BIOUG11758-F08	546[0n]	1		0	0		0	No				25-Jul-2013	Apanteles ensiger	A	Kejimkujik National Park	museum voucher	Biodiversity Institute of Ontario	Collected from 18 Jul 2013 - 25 Jul 2013: 2 malaise traps combined (+GMP#01277)
BBHYJ	BBHYJ346-10	10BBCHY-1305	L#PC2010PA-182	BOLD:AAA3764	10BBCHY-1305	658[0n]	2	JN292963	0	0		1	Yes				13-Aug-2010	Apanteles ensiger	A	Prince Albert NP		Biodiversity Institute of Ontario
CNCBM	CNCHZ1142-09	CAM0522	CAM0522	BOLD:AAA3764	CAM0522	657[0n]	2	JN639922	0	0		0	Yes					Apanteles ensiger	A			Canadian National Collection of Insects, Arachnids and Nematodes
CNCHZ	CNCHZ537-09	CAM0347	CAM0347	BOLD:ACE6783	CAM0347	657[0n]	2	JQ853065	0	0		0	Yes				29-May-2008	Apanteles ensiger	A			Canadian National Collection of Insects, Arachnids and Nematodes
HYCND	HYCND1815-11	CNCHYM 00105			CNCHYM 00105	164[0n]	2		0	0		1	No				23-Apr-1972	Apanteles ensiger	A			Canadian National Collection of Insects, Arachnids and Nematodes
CNPKO	CNPKO2903-14	BIOUG14170-E05	GMP#01512	BOLD:AAA3764	BIOUG14170-E05	546[0n]	1		0	0		0	No				01-Sep-2013	Apanteles ensiger		Pukaskwa National Park	museum voucher	Biodiversity Institute of Ontario	Collected from 26 Aug 2013 - 2 Sep 2013: 2 malaise traps combined (+GMP#01513)
CNCHZ	CNCHZ244-09	CAM0054	CAM0054	BOLD:ACE6783	CAM0054	657[0n]	2	JQ851327	0	0		0	Yes				23-Jul-2007	Apanteles ensiger	A			Canadian National Collection of Insects, Arachnids and Nematodes
ASCM	DSWAS984-07	HYM00000665			HYM00000665	379[5n]	1	JQ854691	0	0		1	No				17-Aug-2006	Apanteles ensiger	A			Canadian National Collection of Insects, Arachnids and Nematodes
CNROJ	CNROJ688-13	BIOUG08749-G01	GMP#01072	BOLD:AAA3764	BIOUG08749-G01	570[0n]	1		0	0		0	No				03-Sep-2013	Apanteles ensiger	A	Rouge National Urban Park	museum voucher	Biodiversity Institute of Ontario	Malaise 27-Aug-13 to 3-Sep-13: 2 traps combined (+GMP#01073)
TDWGB	TDWGB052-10	TDWG-0167	L#2010WH-0074	BOLD:ACE6783	TDWG-0167	658[0n]	2	HQ978614	0	0		1	Yes				29-Sep-2010	Apanteles ensiger	A			Biodiversity Institute of Ontario	Mecury Vapour Light Trap Clear Sky
ASCON	ASWAX959-08	07PROBE-23393	07PROBE-23393	BOLD:AAA3764	07PROBE-23393	657[0n]	2	GU141046	460[9n]	1	GU141386	1	Yes				23-Jul-2007	Apanteles ensiger	A			Biodiversity Institute of Ontario	<VERBATIM LOCALITY>|Ramsay Creek|58.754|-93.949|</VERBATIM LOCALITY>
RBINA	RBINA3615-13	BIOUG07902-D03	ON13-C0063	BOLD:AAA3764	BIOUG07902-D03	576[0n]	1		0	0		0	No				15-Sep-2013	Apanteles ensiger	A	Rouge National Urban Park	museum voucher	Biodiversity Institute of Ontario	Malaise trap
CNCHZ	CNCHZ289-09	CAM0099	CAM0099	BOLD:ACE6783	CAM0099	657[0n]	2	JQ847012	0	0		0	Yes				08-Sep-2007	Apanteles ensiger	A			Canadian National Collection of Insects, Arachnids and Nematodes
SMTPD	SMTPD1793-13	BIOUG08565-E09	GMP#02158	BOLD:ACE6783	BIOUG08565-E09	555[0n]	1		0	0		0	No				27-Sep-2013	Apanteles ensiger	A	Perth East, Mornington Central School	museum voucher	Biodiversity Institute of Ontario	Collected from 23-Sept-13 to 27-Sept-250
CNCHZ	CNCHZ858-09	MIC 000666	MIC 000666	BOLD:ACE6783	MIC 000666	657[0n]	2	JQ855479	0	0		0	Yes				29-May-2008	Apanteles ensiger	A			Canadian National Collection of Insects, Arachnids and Nematodes
CNCHZ	CNCHZ336-09	CAM0146	CAM0146	BOLD:ACE6783	CAM0146	657[0n]	2	JQ850445	0	0		0	Yes				01-Sep-2007	Apanteles ensiger	A			Canadian National Collection of Insects, Arachnids and Nematodes
MBIOJ	MBIOJ817-13	BIOUG09801-C03	GMP#00968	BOLD:ACE6783	BIOUG09801-C03	576[0n]	1		0	0		0	No				05-Sep-2013	Apanteles ensiger	A	Biodiversity Institute of Ontario	museum voucher	Biodiversity Institute of Ontario	Collected Aug 29- Sep 05, 2013. Sunny, but cooler week. Weekly min: 10C max: 36C
CNCHZ	CNCHZ680-09	MIC 000488	MIC 000488	BOLD:ACE6783	MIC 000488	657[0n]	2	JQ848168	0	0		0	Yes				23-Jul-2008	Apanteles ensiger	A			Canadian National Collection of Insects, Arachnids and Nematodes
NCCC	NCCC037-11	BIOUG01572-D01	L#11NCC-01	BOLD:AAA3764	BIOUG01572-D01	657[1n]	2		0	0		0	No				06-Oct-2011	Apanteles ensiger	A	Prairie Smoke		Biodiversity Institute of Ontario	Collected Sept 20-Oct 6 2011
CNCHY	ASWA311-08	HYM00001025	HYM00001025	BOLD:ACE6783	HYM00001025	657[0n]	2	JQ849443	0	0		0	Yes				11-Jun-2007	Apanteles ensiger	A			Canadian National Collection of Insects, Arachnids and Nematodes
CNCHZ	CNCHZ262-09	CAM0072	CAM0072	BOLD:ACE6783	CAM0072	657[0n]	2	JQ852310	0	0		0	Yes				26-Jun-2007	Apanteles ensiger	A			Canadian National Collection of Insects, Arachnids and Nematodes
CNCBM	CNCHZ214-09	CAM0024	CAM0024	BOLD:AAA3764	CAM0024	657[0n]	2	JN639904	0	0		0	Yes				30-Jul-2007	Apanteles ensiger	A			Canadian National Collection of Insects, Arachnids and Nematodes
CNGBN	CNGBN2850-14	BIOUG11726-F01	GMP#01542	BOLD:AAA3764	BIOUG11726-F01	588[0n]	1		0	0		0	No				19-Aug-2013	Apanteles ensiger	A	Georgian Bay Islands National Park	museum voucher	Biodiversity Institute of Ontario	Collected from 06 Aug 2013 - 19 Aug 2013: 2 malaise traps combined (+GMP#01543)
CNMIG	CNMIG137-14	BIOUG12460-D06	GMP#01104	BOLD:AAA3764	BIOUG12460-D06	588[0n]	1		0	0		0	No				06-Aug-2013	Apanteles ensiger		Mingan Archipelago National Park Reserve	museum voucher	Biodiversity Institute of Ontario	Collected from 30 Jul 2013 - 6 Aug 2013: B
MBION	MBION363-14	BIOUG09930-G04	GMP#02134	BOLD:ACE6783	BIOUG09930-G04	585[0n]	1		0	0		0	No				04-Oct-2013	Apanteles ensiger	A	Biodiversity Institute of Ontario	museum voucher	Biodiversity Institute of Ontario	Collected Sept 30 - Oct 4, sunny week, min temp: 7C, max temp: 39C
CNSLH	CNSLH124-12	BIOUG03863-E06	GMP#00137	BOLD:AAA3764	BIOUG03863-E06	627[0n]	1		0	0		0	No				05-Aug-2012	Apanteles ensiger	A	Thousand Islands NP	museum voucher	Biodiversity Institute of Ontario	Collected from August 3 to 10 2012
CNCHZ	CNCHZ229-09	CAM0039	CAM0039	BOLD:ACE6783	CAM0039	657[0n]	2	JQ852175	0	0		0	Yes				10-Aug-2007	Apanteles ensiger	A			Canadian National Collection of Insects, Arachnids and Nematodes
CNCHZ	CNCHZ599-09	CAM0409	CAM0409	BOLD:ACE6783	CAM0409	656[1n]	1	JQ847916	0	0		0	No				04-Jun-2008	Apanteles ensiger	A			Canadian National Collection of Insects, Arachnids and Nematodes
CNCHV	CNCHV584-10	CBRA0492	CBRA0492		CBRA0492	0	0		0	0		1	No				10-Jun-1998	Apanteles sodalis	A			Canadian National Collection of Insects, Arachnids and Nematodes
CNCHV	CNCHV585-10	CBRA0493	CBRA0493	BOLD:AAM7223	CBRA0493	658[0n]	2	HQ558979	0	0		1	Yes				05-Aug-2004	Apanteles sodalis	A	Host: Ennomos subsignaria		Canadian National Collection of Insects, Arachnids and Nematodes
HYCNE	HYCNE025-11	CNCHYM 00215		BOLD:AAM7223	CNCHYM 00215	614[0n]	3	JQ847966	0	0		1	Yes				27-Jun-1978	Apanteles sodalis	A	Archips podana		Canadian National Collection of Insects, Arachnids and Nematodes
CNCHV	CNCHV583-10	CBRA0491	CBRA0491		CBRA0491	0	2		0	0		1	No					Apanteles sodalis	A			Canadian National Collection of Insects, Arachnids and Nematodes
MHABR	MHABR009-09	MIC 000009			MIC 000009	0	2		0	0		0	No				19-Jul-1961	Apanteles sodalis	A			Canadian National Collection of Insects, Arachnids and Nematodes
CNCHV	CNCHV582-10	CBRA0490	CBRA0490	BOLD:AAN1859	CBRA0490	657[1n]	2	HQ558978	0	0		1	Yes				14-May-1998	Apanteles sodalis	A			Canadian National Collection of Insects, Arachnids and Nematodes
MHABR	MHABR007-09	MIC 000007			MIC 000007	144[0n]	3		0	0		0	No				07-May-1977	Apanteles sodalis	A			Canadian National Collection of Insects, Arachnids and Nematodes
MHABR	MHABR013-09	MIC 000013			MIC 000013	144[0n]	4		0	0		0	No				05-Aug-2004	Apanteles sodalis	A			Canadian National Collection of Insects, Arachnids and Nematodes
MHABR	MHABR010-09	MIC 000010			MIC 000010	0	1		0	0		0	No				24-Jul-1961	Apanteles sodalis	A			Canadian National Collection of Insects, Arachnids and Nematodes
MHABR	MHABR011-09	MIC 000011			MIC 000011	144[0n]	2		0	0		0	No				14-May-1998	Apanteles sodalis	A			Canadian National Collection of Insects, Arachnids and Nematodes
MHABR	MHABR014-09	MIC 000014			MIC 000014	144[0n]	4		0	0		0	No				05-Aug-2004	Apanteles sodalis	A			Canadian National Collection of Insects, Arachnids and Nematodes
MHABR	MHABR005-09	MIC 000005			MIC 000005	144[0n]	3		0	0		0	No				07-May-1977	Apanteles sodalis	A			Canadian National Collection of Insects, Arachnids and Nematodes
CNCHV	CNCHV587-10	CBRA0495	CBRA0495	BOLD:AAM7223	CBRA0495	658[0n]	2	HQ558981	0	0		1	Yes				05-Aug-2004	Apanteles sodalis	A	Host: Ennomos subsignaria		Canadian National Collection of Insects, Arachnids and Nematodes
CNCHV	CNCHV586-10	CBRA0494	CBRA0494	BOLD:AAM7223	CBRA0494	658[0n]	2	HQ558980	0	0		1	Yes				05-Aug-2004	Apanteles sodalis	A	Host: Ennomos subsignaria		Canadian National Collection of Insects, Arachnids and Nematodes
MHABR	MHABR012-09	MIC 000012			MIC 000012	144[0n]	2		0	0		0	No				13-Jul-1998	Apanteles sodalis	A			Canadian National Collection of Insects, Arachnids and Nematodes
MHABR	MHABR006-09	MIC 000006			MIC 000006	144[0n]	4		0	0		0	No				07-May-1977	Apanteles sodalis	A			Canadian National Collection of Insects, Arachnids and Nematodes
MHABR	MHABR008-09	MIC 000008			MIC 000008	144[0n]	5		0	0		0	No				02-Jun-1978	Apanteles sodalis	A			Canadian National Collection of Insects, Arachnids and Nematodes
CNGMI	CNGMI700-14	BIOUG10637-H02	GMP#01156	BOLD:AAB1922	BIOUG10637-H02	580[0n]	2		0	0		0	Yes				17-Sep-2013	Apanteles xanthostigma	A	Gros Morne National Park	museum voucher	Biodiversity Institute of Ontario	Collected from 3 Sep 2013 - 17 Sep 2013: 2 malaise traps combined (+GMP#01157): 2 week collection
ASCON	ASWAV862-08	07PROBE-22321	07PROBE-22321	BOLD:AAB1922	07PROBE-22321	634[0n]	2	GU141075	0	0		1	Yes				12-Jul-2007	Apanteles xanthostigma	A			Biodiversity Institute of Ontario	<VERBATIM LOCALITY>|Pumphouse|58.373|-94.134|</VERBATIM LOCALITY>
CNPAD	CNPAD006-13	BIOUG04486-G10	GMP#00261	BOLD:AAB1922	BIOUG04486-G10	631[0n]	1		0	0		0	No				10-Jul-2012	Apanteles xanthostigma	A	Prince Albert NP		Biodiversity Institute of Ontario	Collected from July 10 to 12 2012|bear fence added around trap
CNCHZ	CNCHZ830-09	MIC 000638	MIC 000638	BOLD:AAB1922	MIC 000638	657[0n]	2	JQ852843	0	0		0	Yes				28-May-2005	Apanteles xanthostigma	A			Canadian National Collection of Insects, Arachnids and Nematodes
BACW	ASWAT273-08	07PROBE-20921	07PROBE-20921	BOLD:AAB1922	07PROBE-20921	655[0n]	2	FJ413649	0	0		1	Yes				07-Jul-2007	Apanteles xanthostigma	A			Biodiversity Institute of Ontario	<VERBATIM LOCALITY>|Pumphouse|58.373|-94.134|</VERBATIM LOCALITY>
HYCNE	HYCNE211-11	CNCHYM 00401			CNCHYM 00401	0	2		0	0		1	No				19-Sep-1973	Cotesia crambi	A			Canadian National Collection of Insects, Arachnids and Nematodes
SMTPD	SMTPD4971-13	BIOUG08665-E05	GMP#02164	BOLD:AAH1026	BIOUG08665-E05	594[0n]	1		0	0		0	No				27-Sep-2013	Cotesia crambi		Paris, Holy Family School	museum voucher	Biodiversity Institute of Ontario	Collected from 23-Sept-13 to 27-Sept-180
JSHYO	JSHYO850-11	BIOUG01258-H06	L#JSETM-042	BOLD:AAH1026	BIOUG01258-H06	658[0n]	2		0	0		1	Yes				15-Aug-2010	Cotesia crambi	A			Biodiversity Institute of Ontario	August 14-17 2010
CNCHZ	CNCHZ1162-09	CAM0542	CAM0542	BOLD:AAH1026	CAM0542	657[0n]	2	JQ851025	0	0		0	Yes					Cotesia crambi	A			Canadian National Collection of Insects, Arachnids and Nematodes
MBIOE	MBIOE759-13	BIOUG08742-H10	GMP#00958	BOLD:AAH1026	BIOUG08742-H10	594[0n]	1		0	0		0	No				27-Jun-2013	Cotesia crambi	A	Biodiversity Institute of Ontario	museum voucher	Biodiversity Institute of Ontario	Collected June 20 - June 27, 2013.Very hot and sunny week, 24C on day of collection. Weekly min: 17C, max: 39C
HYCNE	HYCNE214-11	CNCHYM 00404			CNCHYM 00404	164[0n]	4		0	0		1	No				01-Jul-1974	Cotesia crambi	A			Canadian National Collection of Insects, Arachnids and Nematodes	Rutgers University, 134
HYCNE	HYCNE213-11	CNCHYM 00403		BOLD:AAH1026	CNCHYM 00403	356[0n]	2	JQ853014	0	0		1	No				19-Sep-1973	Cotesia crambi	A			Canadian National Collection of Insects, Arachnids and Nematodes
HYCNE	HYCNE212-11	CNCHYM 00402		BOLD:AAH1026	CNCHYM 00402	407[0n]	2	JQ853062	0	0		1	No				07-Sep-1973	Cotesia crambi	A			Canadian National Collection of Insects, Arachnids and Nematodes
CNCHX	CNCHX164-09	CAM1034	CAM1034	BOLD:AAH1026	CAM1034	563[0n]	1	HM430848	0	0		0	No					Cotesia crambi	A			Canadian National Collection of Insects, Arachnids and Nematodes
CNPPD	CNPPD2118-12	BIOUG03438-B06	GMP#00173	BOLD:AAH1026	BIOUG03438-B06	625[0n]	1	KJ084094	0	0		1	No				15-Jun-2012	Cotesia crambi	A	Point Pelee NP	museum voucher	Biodiversity Institute of Ontario	Collected from June 13 to 20 2012
CNCHX	CNCHX023-09	CAM0893	CAM0893	BOLD:AAH1026	CAM0893	426[0n]	2	JQ848608	0	0		0	No					Cotesia crambi	A			Canadian National Collection of Insects, Arachnids and Nematodes
CNPPE	CNPPE479-12	BIOUG03445-F01	GMP#00175	BOLD:AAH1026	BIOUG03445-F01	627[0n]	1	KJ165676	0	0		0	No				29-Jun-2012	Cotesia crambi	A	Point Pelee NP	museum voucher	Biodiversity Institute of Ontario	Collected from June 27 to July 4 2012
HYCNE	HYCNE902-11	CNCHYM 01091		BOLD:AAA5826	CNCHYM 01091	624[0n]	3	JQ853490	0	0		1	Yes				09-Jul-1978	Dolichogenidea longicauda	A	Host: Swammerdamia beinnei		Canadian National Collection of Insects, Arachnids and Nematodes
HYCNE	HYCNE904-11	CNCHYM 01093		BOLD:AAA5826	CNCHYM 01093	614[0n]	3	JQ854734	0	0		1	Yes				05-May-1978	Dolichogenidea longicauda	A	S. ocellana		Canadian National Collection of Insects, Arachnids and Nematodes
HYCNE	HYCNE900-11	CNCHYM 01089		BOLD:AAA5826	CNCHYM 01089	619[0n]	3	JQ852158	0	0		1	Yes				01-Jul-1977	Dolichogenidea longicauda	A			Canadian National Collection of Insects, Arachnids and Nematodes
HYCNE	HYCNE026-11	CNCHYM 00216		BOLD:AAA5826	CNCHYM 00216	464[2n]	2	JQ855094	0	0		1	No				01-Jul-1977	Dolichogenidea longicauda	A	H. pariana		Canadian National Collection of Insects, Arachnids and Nematodes
HYCNE	HYCNE1175-11	CNCHYM 01363		BOLD:AAC1797	CNCHYM 01363	312[0n]	2	JQ852450	0	0		1	No				18-Aug-1978	Hygroplitis melligaster	A			Canadian National Collection of Insects, Arachnids and Nematodes	Code 74574
HYCNE	HYCNE1178-11	CNCHYM 01366			CNCHYM 01366	164[0n]	2		0	0		1	No				29-Jul-1957	Hygroplitis melligaster	A			Canadian National Collection of Insects, Arachnids and Nematodes
HYCNE	HYCNE1187-11	CNCHYM 01375			CNCHYM 01375	123[0n]	1		0	0		1	No				28-Jul-1983	Hygroplitis melligaster	A			Canadian National Collection of Insects, Arachnids and Nematodes
CNCBA	CNCBA789-10	GOU 0314	GOU 0314		GOU 0314	263[0n]	1		0	0		0	No				26-Jun-1991	Hygroplitis melligaster	A			Canadian National Collection of Insects, Arachnids and Nematodes
HYCNE	HYCNE1177-11	CNCHYM 01365			CNCHYM 01365	94[0n]	1		0	0		1	No				09-Aug-1958	Hygroplitis melligaster	A			Canadian National Collection of Insects, Arachnids and Nematodes
CNCHZ	CNCHZ663-09	CAM0473	CAM0473	BOLD:AAC1797	CAM0473	657[0n]	2	JQ848189	0	0		0	Yes				23-Jul-2008	Hygroplitis melligaster	A			Canadian National Collection of Insects, Arachnids and Nematodes
HYCNE	HYCNE1181-11	CNCHYM 01369			CNCHYM 01369	164[0n]	2		0	0		1	No				08-Aug-1959	Hygroplitis melligaster	A			Canadian National Collection of Insects, Arachnids and Nematodes
CNCHZ	CNCHZ660-09	CAM0470	CAM0470	BOLD:AAC1797	CAM0470	657[0n]	2	JQ850038	0	0		0	Yes				23-Jul-2008	Hygroplitis melligaster	A			Canadian National Collection of Insects, Arachnids and Nematodes
CNCHZ	CNCHZ661-09	CAM0471	CAM0471	BOLD:AAC1797	CAM0471	657[0n]	2	JQ855071	0	0		0	Yes				23-Jul-2008	Hygroplitis melligaster	A			Canadian National Collection of Insects, Arachnids and Nematodes
CNCHZ	CNCHZ658-09	CAM0468	CAM0468	BOLD:AAC1797	CAM0468	657[0n]	2	JQ847718	0	0		0	Yes				23-Jul-2008	Hygroplitis melligaster	A			Canadian National Collection of Insects, Arachnids and Nematodes
HYCNE	HYCNE1182-11	CNCHYM 01370			CNCHYM 01370	0	0		0	0		1	No				12-Jul-1957	Hygroplitis melligaster	A			Canadian National Collection of Insects, Arachnids and Nematodes
CNCHZ	CNCHZ653-09	CAM0463	CAM0463	BOLD:AAC1797	CAM0463	657[0n]	2	JQ854902	0	0		0	Yes				23-Jul-2008	Hygroplitis melligaster	A			Canadian National Collection of Insects, Arachnids and Nematodes
CNCHZ	CNCHZ655-09	CAM0465	CAM0465	BOLD:AAC1797	CAM0465	657[0n]	2	JQ849275	0	0		0	Yes				23-Jul-2008	Hygroplitis melligaster	A			Canadian National Collection of Insects, Arachnids and Nematodes
CNCHZ	CNCHZ654-09	CAM0464	CAM0464	BOLD:AAC1797	CAM0464	657[0n]	2	JQ848219	0	0		0	Yes				23-Jul-2008	Hygroplitis melligaster	A			Canadian National Collection of Insects, Arachnids and Nematodes
HYCNE	HYCNE1180-11	CNCHYM 01368		BOLD:AAC1797	CNCHYM 01368	614[0n]	3	JQ847888	0	0		1	Yes				14-Aug-1958	Hygroplitis melligaster	A			Canadian National Collection of Insects, Arachnids and Nematodes
HYCNE	HYCNE1179-11	CNCHYM 01367		BOLD:AAC1797	CNCHYM 01367	631[0n]	3	JQ853718	0	0		1	Yes				29-Jul-1975	Hygroplitis melligaster	A			Canadian National Collection of Insects, Arachnids and Nematodes	2-113I
CNCHZ	CNCHZ652-09	CAM0462	CAM0462	BOLD:AAC1797	CAM0462	657[0n]	2	JQ849104	0	0		0	Yes				23-Jul-2008	Hygroplitis melligaster	A			Canadian National Collection of Insects, Arachnids and Nematodes
HYCNE	HYCNE1183-11	CNCHYM 01371			CNCHYM 01371	0	0		0	0		1	No				20-Jul-1962	Hygroplitis melligaster	A			Canadian National Collection of Insects, Arachnids and Nematodes
CNCHZ	CNCHZ659-09	CAM0469	CAM0469	BOLD:AAC1797	CAM0469	657[0n]	2	JQ847963	0	0		0	Yes				23-Jul-2008	Hygroplitis melligaster	A			Canadian National Collection of Insects, Arachnids and Nematodes
HYCNE	HYCNE1188-11	CNCHYM 01376			CNCHYM 01376	164[0n]	2		0	0		1	No				22-Jul-1972	Hygroplitis melligaster	A			Canadian National Collection of Insects, Arachnids and Nematodes
HYCNE	HYCNE1176-11	CNCHYM 01364			CNCHYM 01364	164[0n]	2		0	0		1	No				22-Aug-1963	Hygroplitis melligaster	A			Canadian National Collection of Insects, Arachnids and Nematodes
HYCNE	HYCNE1189-11	CNCHYM 01377			CNCHYM 01377	164[0n]	2		0	0		1	No				31-Jul-1972	Hygroplitis melligaster	A			Canadian National Collection of Insects, Arachnids and Nematodes
HYCNE	HYCNE1190-11	CNCHYM 01378			CNCHYM 01378	164[0n]	2		0	0		1	No				09-Jul-1982	Hygroplitis melligaster	A			Canadian National Collection of Insects, Arachnids and Nematodes
JSHYN	JSHYN833-11	BIOUG01082-E12	L#JSETM-028	BOLD:AAC1797	BIOUG01082-E12	630[0n]	5		0	0		1	Yes				17-Jul-2010	Hygroplitis melligaster	A			Biodiversity Institute of Ontario	July 16-18 2010
CNCHZ	CNCHZ664-09	CAM0474	CAM0474	BOLD:AAC1797	CAM0474	657[0n]	2	JQ854985	0	0		0	Yes				23-Jul-2008	Hygroplitis melligaster	A			Canadian National Collection of Insects, Arachnids and Nematodes
CNCHZ	CNCHZ656-09	CAM0466	CAM0466	BOLD:AAC1797	CAM0466	657[0n]	2	JQ854959	0	0		0	Yes				23-Jul-2008	Hygroplitis melligaster	A			Canadian National Collection of Insects, Arachnids and Nematodes
CNCHZ	CNCHZ662-09	CAM0472	CAM0472	BOLD:AAC1797	CAM0472	657[0n]	2	JQ846781	0	0		0	Yes				23-Jul-2008	Hygroplitis melligaster	A			Canadian National Collection of Insects, Arachnids and Nematodes
CNCHZ	CNCHZ657-09	CAM0467	CAM0467	BOLD:AAC1797	CAM0467	657[0n]	2	JQ852397	0	0		0	Yes				23-Jul-2008	Hygroplitis melligaster	A			Canadian National Collection of Insects, Arachnids and Nematodes
CNCBM	CNCHZ468-09	CAM0278	CAM0278	BOLD:AAA9172	CAM0278	657[0n]	2	JN640190	0	0		0	Yes				30-May-2007	Pholetesor bedelliae	A			Canadian National Collection of Insects, Arachnids and Nematodes
SSBAD	SSBAD5451-13	BIOUG04442-A12	L#12BIOBUS-1249	BOLD:AAA9172	BIOUG04442-A12	600[0n]	1		0	0		1	No				25-Jul-2012	Pholetesor bedelliae	A	Banff NP	museum voucher	Biodiversity Institute of Ontario
CNCBM	DSWAS929-07	HYM00000958	HYM00000958	BOLD:AAA9172	HYM00000958	657[0n]	2	JN640207	0	0		0	Yes				05-Jul-2006	Pholetesor bedelliae	A			Canadian National Collection of Insects, Arachnids and Nematodes	HYM000516
CNCHV	CNCHV275-10	CNCH3205	CNCH3205	BOLD:AAA9172	CNCH3205	658[0n]	2	HM397372	0	0		0	Yes				18-Jul-2009	Pholetesor bedelliae	A			Canadian National Collection of Insects, Arachnids and Nematodes
ASCON	DSWAS761-07	HYM00000818	HYM00000818		HYM00000818	293[0n]	1	GU141335	0	0		1	No				19-Aug-2006	Pholetesor bedelliae	A			Canadian National Collection of Insects, Arachnids and Nematodes
CNCHV	CNCHV282-10	CNCH3212	CNCH3212	BOLD:AAA9172	CNCH3212	658[0n]	2	HM397379	0	0		0	Yes				18-Jul-2009	Pholetesor bedelliae	A			Canadian National Collection of Insects, Arachnids and Nematodes
NGNAC	NGNAC1789-13	BIOUG07357-A10	GMP#01949	BOLD:AAA9172	BIOUG07357-A10	545[0n]	1		0	0		0	No				11-Jul-2013	Pholetesor bedelliae	A		museum voucher	Biodiversity Institute of Ontario	collected July 4 - July 11, 2013
CNCBM	DSWAS965-07	HYM00000994	HYM00000994	BOLD:AAA9172	HYM00000994	657[0n]	2	JN640221	0	0		0	Yes				16-Jul-2006	Pholetesor bedelliae	A			Canadian National Collection of Insects, Arachnids and Nematodes	HYM000552
CNCBM	DSWAS945-07	HYM00000974	HYM00000974	BOLD:AAA9172	HYM00000974	657[0n]	2	JN640214	0	0		0	Yes				08-Jul-2006	Pholetesor bedelliae	A			Canadian National Collection of Insects, Arachnids and Nematodes	HYM000532
CNCBM	DSWAS924-07	HYM00000953	HYM00000953	BOLD:AAA9172	HYM00000953	601[0n]	4	JN640205	0	0		0	Yes				15-Jul-2006	Pholetesor bedelliae	A			Canadian National Collection of Insects, Arachnids and Nematodes	HYM000511
ASCON	ASWAY564-08	HYM00000821.2	HYM00000821.2		HYM00000821.2	0	1		0	0		0	No				17-Jul-1949	Pholetesor bedelliae	A			Canadian National Collection of Insects, Arachnids and Nematodes	<VERBATIM LOCALITY>|Churchill|||</VERBATIM LOCALITY>
HYCNE	HYCNE1821-11	CNCHYM 03136			CNCHYM 03136	0	0		0	0		1	No				07-Sep-1963	Pholetesor bedelliae	A	Ex. Bucculatrix sp.		Canadian National Collection of Insects, Arachnids and Nematodes	#68 S63-5153-01-2
ASCM	DSWAS764-07	HYM00000821			HYM00000821	0	0		0	0		0	No				17-Jul-1949	Pholetesor bedelliae	A			Canadian National Collection of Insects, Arachnids and Nematodes
CNCBM	DSWAS912-07	HYM00000941	HYM00000941	BOLD:AAA9172	HYM00000941	657[0n]	2	JN640199	0	0		0	Yes				08-Jul-2006	Pholetesor bedelliae	A			Canadian National Collection of Insects, Arachnids and Nematodes	HYM000499
CNCHV	CNCHV279-10	CNCH3209	CNCH3209	BOLD:AAA9172	CNCH3209	658[0n]	2	HM397376	0	0		0	Yes				18-Jul-2009	Pholetesor bedelliae	A			Canadian National Collection of Insects, Arachnids and Nematodes
CNCHV	CNCHV380-10	CNCH3215	CNCH3215	BOLD:AAA9172	CNCH3215	658[0n]	2	HM397470	0	0		0	Yes				22-Jul-2009	Pholetesor bedelliae	A			Canadian National Collection of Insects, Arachnids and Nematodes
HYCNE	HYCNE1828-11	CNCHYM 03143			CNCHYM 03143	0	0		0	0		1	No				26-May-1958	Pholetesor bedelliae	A	Ex. Leucoptera pachystemella		Canadian National Collection of Insects, Arachnids and Nematodes	58-5080-01-i
CNCBM	DSWAS967-07	HYM00000996	HYM00000996	BOLD:AAA9172	HYM00000996	657[0n]	2	JN640222	0	0		0	Yes				16-Jul-2006	Pholetesor bedelliae	A			Canadian National Collection of Insects, Arachnids and Nematodes	HYM000554
CNCHX	CNCHX970-09	CNCH0955	CNCH0955	BOLD:AAA9172	CNCH0955	652[0n]	2	HM431130	0	0		0	Yes				20-Jul-2009	Pholetesor bedelliae	A			Canadian National Collection of Insects, Arachnids and Nematodes
CNCBM	DSWAS919-07	HYM00000948	HYM00000948	BOLD:AAA9172	HYM00000948	657[0n]	2	JN640202	0	0		0	Yes				15-Jul-2006	Pholetesor bedelliae	A			Canadian National Collection of Insects, Arachnids and Nematodes	HYM000506
CNCHV	CNCHV278-10	CNCH3208	CNCH3208	BOLD:AAA9172	CNCH3208	658[0n]	2	HM397375	0	0		0	Yes				18-Jul-2009	Pholetesor bedelliae	A			Canadian National Collection of Insects, Arachnids and Nematodes
CNCBM	DSWAS957-07	HYM00000986	HYM00000986	BOLD:AAA9172	HYM00000986	657[0n]	2	JN640218	0	0		0	Yes				08-Jul-2006	Pholetesor bedelliae	A			Canadian National Collection of Insects, Arachnids and Nematodes	HYM000544
ASCM	DSWAS763-07	HYM00000820			HYM00000820	0	0		0	0		0	No				16-Jul-1952	Pholetesor bedelliae	A			Canadian National Collection of Insects, Arachnids and Nematodes
CNCBM	DSWAS942-07	HYM00000971	HYM00000971	BOLD:AAA9172	HYM00000971	657[0n]	2	JN640211	0	0		0	Yes				08-Jul-2006	Pholetesor bedelliae	A			Canadian National Collection of Insects, Arachnids and Nematodes	HYM000529
CNCBM	DSWAS926-07	HYM00000955	HYM00000955	BOLD:AAA9172	HYM00000955	657[0n]	2	JN640206	0	0		0	Yes				15-Jul-2006	Pholetesor bedelliae	A			Canadian National Collection of Insects, Arachnids and Nematodes	HYM000513
CNCHV	CNCHV375-10	CNCH3306	CNCH3306	BOLD:AAA9172	CNCH3306	658[0n]	2	HM397465	0	0		0	Yes				22-Jul-2009	Pholetesor bedelliae	A			Canadian National Collection of Insects, Arachnids and Nematodes
CNCBM	DSWAS943-07	HYM00000972	HYM00000972	BOLD:AAA9172	HYM00000972	607[7n]	2	JN640212	0	0		0	No				08-Jul-2006	Pholetesor bedelliae	A			Canadian National Collection of Insects, Arachnids and Nematodes	HYM000530
ASYMI	DSWAS918-07	HYM00000947	HYM00000947	BOLD:AAA9172	HYM00000947	539[0n]	2	JQ855027	0	0		0	Yes				15-Jul-2006	Pholetesor bedelliae	A			Canadian National Collection of Insects, Arachnids and Nematodes	HYM000505
CNCHV	CNCHV379-10	CNCH3310	CNCH3310	BOLD:AAA9172	CNCH3310	658[0n]	2	HM397469	0	0		0	Yes				22-Jul-2009	Pholetesor bedelliae	A			Canadian National Collection of Insects, Arachnids and Nematodes
CNCBM	DSWAS902-07	HYM00000931	HYM00000931	BOLD:AAA9172	HYM00000931	657[0n]	2	JN640193	0	0		0	Yes				15-Jul-2006	Pholetesor bedelliae	A			Canadian National Collection of Insects, Arachnids and Nematodes	HYM000489
CNCBM	DSWAS956-07	HYM00000985	HYM00000985	BOLD:AAA9172	HYM00000985	657[0n]	2	JN640217	0	0		0	Yes				08-Jul-2006	Pholetesor bedelliae	A			Canadian National Collection of Insects, Arachnids and Nematodes	HYM000543
CNCHV	CNCHV273-10	CNCH3203	CNCH3203	BOLD:AAA9172	CNCH3203	658[0n]	2	HM397370	0	0		0	Yes				18-Jul-2009	Pholetesor bedelliae	A			Canadian National Collection of Insects, Arachnids and Nematodes
HYCNE	HYCNE1826-11	CNCHYM 03141			CNCHYM 03141	164[0n]	2		0	0		1	No				13-Jul-1961	Pholetesor bedelliae	A			Canadian National Collection of Insects, Arachnids and Nematodes
CNCHX	CNCHX1010-09	CNCH0995	CNCH0995	BOLD:AAA9172	CNCH0995	648[0n]	2	HM430761	0	0		0	Yes				20-Jul-2009	Pholetesor bedelliae	A			Canadian National Collection of Insects, Arachnids and Nematodes
CNCBM	CNCHY059-07	HYM00000331	HYM00000331	BOLD:AAA9172	HYM00000331	657[0n]	2	JN640192	0	0		1	Yes				10-Jul-2006	Pholetesor bedelliae	A			Canadian National Collection of Insects, Arachnids and Nematodes
ASYMI	DSWAS910-07	HYM00000939	HYM00000939	BOLD:AAA9172	HYM00000939	379[0n]	3	JQ850818	0	0		0	No				08-Jul-2006	Pholetesor bedelliae	A			Canadian National Collection of Insects, Arachnids and Nematodes	HYM000497
CNCBM	DSWAS940-07	HYM00000969	HYM00000969	BOLD:AAA9172	HYM00000969	614[0n]	2	JN640209	0	0		0	Yes				08-Jul-2006	Pholetesor bedelliae	A			Canadian National Collection of Insects, Arachnids and Nematodes	HYM000527
CNCHX	CNCHX1008-09	CNCH0993	CNCH0993	BOLD:AAA9172	CNCH0993	658[0n]	2	HM430760	0	0		0	Yes				20-Jul-2009	Pholetesor bedelliae	A			Canadian National Collection of Insects, Arachnids and Nematodes
HYCNE	HYCNE1830-11	CNCHYM 03145			CNCHYM 03145	164[0n]	2		0	0		1	No				09-Jul-1970	Pholetesor bedelliae	A			Canadian National Collection of Insects, Arachnids and Nematodes
ASCON	DSWAS762-07	HYM00000819	HYM00000819		HYM00000819	283[0n]	1	GU141334	0	0		1	No				19-Aug-2006	Pholetesor bedelliae	A			Canadian National Collection of Insects, Arachnids and Nematodes
HYCNE	HYCNE1823-11	CNCHYM 03138			CNCHYM 03138	0	0		0	0		1	No				22-Jun-1962	Pholetesor bedelliae	A	Gracillaria invariabilis		Canadian National Collection of Insects, Arachnids and Nematodes	No. 62-330-028
CNCHV	CNCHV274-10	CNCH3204	CNCH3204	BOLD:AAA9172	CNCH3204	658[0n]	2	HM397371	0	0		0	Yes				18-Jul-2009	Pholetesor bedelliae	A			Canadian National Collection of Insects, Arachnids and Nematodes
CNCHV	CNCHV283-10	CNCH3213	CNCH3213	BOLD:AAA9172	CNCH3213	658[0n]	2	HM397380	0	0		0	Yes				18-Jul-2009	Pholetesor bedelliae	A			Canadian National Collection of Insects, Arachnids and Nematodes
ASGLF	ASGLF308-11	BIOUG00989-E07	MAS919-10	BOLD:AAA9172	BIOUG00989-E07	658[0n]	2	JQ853192	0	0		1	Yes				19-Sep-2010	Pholetesor bedelliae	A	Windy Bluff		Research Collection of M. Alex Smith
CNPPJ	CNPPJ1263-12	BIOUG03931-A10	GMP#00185	BOLD:AAA9172	BIOUG03931-A10	636[0n]	1	KJ208441	0	0		1	No				07-Sep-2012	Pholetesor bedelliae	A	Point Pelee NP	museum voucher	Biodiversity Institute of Ontario	Collected from September 5 to 12 2012
CNCHX	CNCHX980-09	CNCH0965	CNCH0965	BOLD:AAA9172	CNCH0965	658[0n]	2	HM431140	0	0		0	Yes				20-Jul-2009	Pholetesor bedelliae	A			Canadian National Collection of Insects, Arachnids and Nematodes
CNCBM	ASWA608-08	HYM00001322	HYM00001322	BOLD:AAA9172	HYM00001322	657[0n]	2	JN640189	0	0		0	Yes				04-Jun-2007	Pholetesor bedelliae	A			Canadian National Collection of Insects, Arachnids and Nematodes
CNCBM	CNCHZ627-09	CAM0437	CAM0437	BOLD:AAA9172	CAM0437	657[0n]	2	JN640191	0	0		0	Yes				29-May-2008	Pholetesor bedelliae	A			Canadian National Collection of Insects, Arachnids and Nematodes
CNCBM	DSWAS961-07	HYM00000990	HYM00000990	BOLD:AAA9172	HYM00000990	657[0n]	2	JN640220	0	0		0	Yes				15-Jul-2006	Pholetesor bedelliae	A			Canadian National Collection of Insects, Arachnids and Nematodes	HYM000548
HYCNE	HYCNE1824-11	CNCHYM 03139			CNCHYM 03139	0	0		0	0		1	No				03-Aug-1962	Pholetesor bedelliae	A	Ex. Gracillaria fraxinella		Canadian National Collection of Insects, Arachnids and Nematodes	862-4551-01-01, #28
CNCBM	DSWAS946-07	HYM00000975	HYM00000975	BOLD:AAA9172	HYM00000975	657[0n]	2	JN640215	0	0		0	Yes				08-Jul-2006	Pholetesor bedelliae	A			Canadian National Collection of Insects, Arachnids and Nematodes	HYM000533
CNCHV	CNCHV276-10	CNCH3206	CNCH3206	BOLD:AAA9172	CNCH3206	646[0n]	2	HM397373	0	0		0	Yes				18-Jul-2009	Pholetesor bedelliae	A			Canadian National Collection of Insects, Arachnids and Nematodes
CNCBM	DSWAS906-07	HYM00000935	HYM00000935	BOLD:AAA9172	HYM00000935	657[0n]	2	JN640195	0	0		0	Yes				15-Jul-2006	Pholetesor bedelliae	A			Canadian National Collection of Insects, Arachnids and Nematodes	HYM000493
CNCHX	CNCHX1023-09	CNCH1008	CNCH1008	BOLD:AAA9172	CNCH1008	658[0n]	2	HM430775	0	0		0	Yes				20-Jul-2009	Pholetesor bedelliae	A			Canadian National Collection of Insects, Arachnids and Nematodes
CNCBM	DSWAS958-07	HYM00000987	HYM00000987	BOLD:AAA9172	HYM00000987	657[0n]	2	JN640219	0	0		0	Yes				08-Jul-2006	Pholetesor bedelliae	A			Canadian National Collection of Insects, Arachnids and Nematodes	HYM000545
CNCHX	CNCHX1002-09	CNCH0987	CNCH0987	BOLD:AAA9172	CNCH0987	658[0n]	2	HM430754	0	0		0	Yes				20-Jul-2009	Pholetesor bedelliae	A			Canadian National Collection of Insects, Arachnids and Nematodes
BBHYM	BBHYM324-09	08BBHYM-1368	L#08GRAS-031	BOLD:AAA9172		657[0n]	2	HM374783	0	0		1	Yes				16-Jul-2008	Pholetesor bedelliae	A	Grasslands NP		Biodiversity Institute of Ontario
CNCBM	DSWAS939-07	HYM00000968	HYM00000968	BOLD:AAA9172	HYM00000968	657[0n]	2	JN640208	0	0		0	Yes				08-Jul-2006	Pholetesor bedelliae	A			Canadian National Collection of Insects, Arachnids and Nematodes	HYM000526
HYCNE	HYCNE1829-11	CNCHYM 03144			CNCHYM 03144	0	0		0	0		1	No				01-Dec-1944	Pholetesor bedelliae	A	Rd-Larv-Sweet potato leaf miner		Canadian National Collection of Insects, Arachnids and Nematodes	No.456142 SS 24194
CNCBM	DSWAS907-07	HYM00000936	HYM00000936	BOLD:AAA9172	HYM00000936	657[0n]	2	JN640196	0	0		0	Yes				15-Jul-2006	Pholetesor bedelliae	A			Canadian National Collection of Insects, Arachnids and Nematodes	HYM000494
CNCBM	DSWAS922-07	HYM00000951	HYM00000951	BOLD:AAA9172	HYM00000951	657[0n]	2	JN640204	0	0		0	Yes				15-Jul-2006	Pholetesor bedelliae	A			Canadian National Collection of Insects, Arachnids and Nematodes	HYM000509
CNCBM	ASWA606-08	HYM00001320	HYM00001320	BOLD:AAA9172	HYM00001320	657[0n]	2	JN640188	0	0		0	Yes				04-Jun-2007	Pholetesor bedelliae	A			Canadian National Collection of Insects, Arachnids and Nematodes
ASCON	DSWAS863-07	HYM00000920	HYM00000920	BOLD:AAA9172	HYM00000920	596[0n]	2	GU141333	0	0		1	Yes				17-Aug-2006	Pholetesor bedelliae	A			Canadian National Collection of Insects, Arachnids and Nematodes
HYCNE	HYCNE1822-11	CNCHYM 03137			CNCHYM 03137	164[0n]	2		0	0		1	No				03-Aug-1971	Pholetesor bedelliae	A	Ex.Micuvapteryx sp. on Salix sp.		Canadian National Collection of Insects, Arachnids and Nematodes	715-1434-01-10
ASCON	ASWAY563-08	HYM00000820.2	HYM00000820.2		HYM00000820.2	0	1		0	0		0	No				16-Jul-1952	Pholetesor bedelliae	A			Canadian National Collection of Insects, Arachnids and Nematodes	<VERBATIM LOCALITY>|Mile 505, Hudson Bay Rwy.|||</VERBATIM LOCALITY>
CNCBM	DSWAS947-07	HYM00000976	HYM00000976	BOLD:AAA9172	HYM00000976	657[0n]	2	JN640216	0	0		0	Yes				08-Jul-2006	Pholetesor bedelliae	A			Canadian National Collection of Insects, Arachnids and Nematodes	HYM000534
CNCBM	DSWAS914-07	HYM00000943	HYM00000943	BOLD:AAA9172	HYM00000943	657[0n]	2	JN640201	0	0		0	Yes				08-Jul-2006	Pholetesor bedelliae	A			Canadian National Collection of Insects, Arachnids and Nematodes	HYM000501
CNCBM	DSWAS905-07	HYM00000934	HYM00000934	BOLD:AAA9172	HYM00000934	657[0n]	2	JN640194	0	0		0	Yes				15-Jul-2006	Pholetesor bedelliae	A			Canadian National Collection of Insects, Arachnids and Nematodes	HYM000492
CNCBM	DSWAS909-07	HYM00000938	HYM00000938	BOLD:AAA9172	HYM00000938	657[0n]	2	JN640197	0	0		0	Yes				08-Jul-2006	Pholetesor bedelliae	A			Canadian National Collection of Insects, Arachnids and Nematodes	HYM000496
CNCBM	DSWAS921-07	HYM00000950	HYM00000950	BOLD:AAA9172	HYM00000950	657[0n]	2	JN640203	0	0		0	Yes				15-Jul-2006	Pholetesor bedelliae	A			Canadian National Collection of Insects, Arachnids and Nematodes	HYM000508
ASYMI	DSWAS927-07	HYM00000956	HYM00000956	BOLD:AAA9172	HYM00000956	379[0n]	3	JQ852706	0	0		0	No				08-Jul-2006	Pholetesor bedelliae	A			Canadian National Collection of Insects, Arachnids and Nematodes	HYM000514
CNCBM	DSWAS944-07	HYM00000973	HYM00000973	BOLD:AAA9172	HYM00000973	657[0n]	2	JN640213	0	0		0	Yes				08-Jul-2006	Pholetesor bedelliae	A			Canadian National Collection of Insects, Arachnids and Nematodes	HYM000531
CNCBM	DSWAS941-07	HYM00000970	HYM00000970	BOLD:AAA9172	HYM00000970	657[0n]	2	JN640210	0	0		0	Yes				08-Jul-2006	Pholetesor bedelliae	A			Canadian National Collection of Insects, Arachnids and Nematodes	HYM000528
CNCBM	DSWAS911-07	HYM00000940	HYM00000940	BOLD:AAA9172	HYM00000940	657[0n]	2	JN640198	0	0		0	Yes				08-Jul-2006	Pholetesor bedelliae	A			Canadian National Collection of Insects, Arachnids and Nematodes	HYM000498
HYCNE	HYCNE1827-11	CNCHYM 03142			CNCHYM 03142	164[0n]	2		0	0		1	No				20-Jul-1967	Pholetesor bedelliae	A			Canadian National Collection of Insects, Arachnids and Nematodes
CNCBM	DSWAS913-07	HYM00000942	HYM00000942	BOLD:AAA9172	HYM00000942	657[0n]	2	JN640200	0	0		0	Yes				08-Jul-2006	Pholetesor bedelliae	A			Canadian National Collection of Insects, Arachnids and Nematodes	HYM000500
HYCNE	HYCNE1825-11	CNCHYM 03140			CNCHYM 03140	0	0		0	0		1	No				15-Aug-1961	Pholetesor bedelliae	A			Canadian National Collection of Insects, Arachnids and Nematodes
ASCON	ASWA270-08	07PROBE-20072	07PROBE-20072		07PROBE-20072	0	0		0	0		0	No				07-Jul-2007	Pholetesor bedelliae	A			Biodiversity Institute of Ontario	PLT-0034 G11<VERBATIM LOCALITY>|Twin Lakes 22 km SE Churchill|58.632|-93.788|</VERBATIM LOCALITY>
HYCNF	HYCNF002-11	CNCHYM 03217			CNCHYM 03217	0	1		0	0		1	No				09-Aug-1961	Pholetesor viminetorum	A			Canadian National Collection of Insects, Arachnids and Nematodes
ASCON	DSWAS749-07	HYM00000806	HYM00000806		HYM00000806	0	0		0	0		0	No				18-Jul-1952	Pholetesor viminetorum	A			Canadian National Collection of Insects, Arachnids and Nematodes
ASCON	ASWAV964-08	07PROBE-22423	07PROBE-22423	BOLD:AAA5660	07PROBE-22423	613[0n]	2	GU141374	525[6n]	1	GU141562	1	Yes				16-Jul-2007	Pholetesor viminetorum	A			Biodiversity Institute of Ontario	<VERBATIM LOCALITY>|Ramsay Creek|58.754|-93.949|</VERBATIM LOCALITY>
SSGBB	SSGBB2792-14	BIOUG14184-G04	L#13BIOBUS-0656	BOLD:AAA5660	BIOUG14184-G04	600[0n]	1		0	0		0	No				19-Jul-2013	Pholetesor viminetorum		Gros Morne NP	museum voucher	Biodiversity Institute of Ontario	2 malaise traps | overcast and cool at time of collection | 10 July - 20 July 2013
CNCAS	ASWAY600-08	HYM00000809.2	HYM00000809.2		HYM00000809.2	99[1n]	1	GU141817	0	0		0	No				11-Jul-1952	Pholetesor viminetorum	A			Canadian National Collection of Insects, Arachnids and Nematodes
CBRAE	JBHCH968-10	10PROBE-29276	L#10PROBE-0284	BOLD:AAA5660	10PROBE-29276	658[0n]	2	JX830604	0	0		1	Yes				19-Jul-2010	Pholetesor viminetorum	A			Biodiversity Institute of Ontario	sweep net on hill and base of hill sweep net ethanol
ASCON	ASWAS997-07	HYM00000798	HYM00000798		HYM00000798	0	0		0	0		0	No				07-Aug-1952	Pholetesor viminetorum	A			Canadian National Collection of Insects, Arachnids and Nematodes
CNCHX	CNCHX088-09	CAM0958	CAM0958	BOLD:AAA5660	CAM0958	658[0n]	2	HM430739	0	0		0	Yes				11-Jul-2008	Pholetesor viminetorum	A			Canadian National Collection of Insects, Arachnids and Nematodes
CNCBM	DSWAS952-07	HYM00000981	HYM00000981	BOLD:AAA5660	HYM00000981	657[0n]	2	JN640274	0	0		0	Yes				06-Jul-2006	Pholetesor viminetorum	A			Canadian National Collection of Insects, Arachnids and Nematodes	HYM000539
CNEIB	CNEIB1042-12	BIOUG03191-A01	GMP#00411	BOLD:AAA5660	BIOUG03191-A01	633[0n]	1		0	0		0	No				10-Jun-2012	Pholetesor viminetorum		Elk Island NP	museum voucher	Biodiversity Institute of Ontario	Collected from June 8 to 15 2012
CNCAS	ASWAY590-08	HYM00000792.2	HYM00000792.2		HYM00000792.2	305[0n]	1	GU141819	0	0		0	No				21-Jul-1952	Pholetesor viminetorum	A			Canadian National Collection of Insects, Arachnids and Nematodes
CNCBM	CNCHZ617-09	CAM0427	CAM0427	BOLD:AAA5660	CAM0427	657[0n]	2	JN640258	0	0		0	Yes				29-May-2008	Pholetesor viminetorum	A			Canadian National Collection of Insects, Arachnids and Nematodes
ASCON	ASWAS994-07	HYM00000795	HYM00000795		HYM00000795	0	0		0	0		0	No				21-Jun-1952	Pholetesor viminetorum	A			Canadian National Collection of Insects, Arachnids and Nematodes
ASCM	DSWAS756-07	HYM00000813			HYM00000813	0	0		0	0		0	No				07-Nov-1952	Pholetesor viminetorum	A			Canadian National Collection of Insects, Arachnids and Nematodes
WOMIA	WOMIA352-11	GOU 0582	GOU 0582	BOLD:AAA5660	GOU 0582	658[0n]	2	JN282156	0	0		0	Yes				02-Aug-2009	Pholetesor viminetorum	A			Canadian National Collection of Insects, Arachnids and Nematodes
ASCON	ASWAX965-08	07PROBE-23399	07PROBE-23399	BOLD:AAA5660	07PROBE-23399	657[0n]	2	GU141340	526[5n]	1	GU141545	1	Yes				23-Jul-2007	Pholetesor viminetorum				Biodiversity Institute of Ontario	<VERBATIM LOCALITY>|Ramsay Creek|58.754|-93.949|</VERBATIM LOCALITY>
ASCON	DSWAS865-07	HYM00000922	HYM00000922		HYM00000922	0	0		0	0		0	No				11-Jul-1952	Pholetesor viminetorum	A			Canadian National Collection of Insects, Arachnids and Nematodes
CNCBM	CNCHZ602-09	CAM0412	CAM0412	BOLD:AAA5660	CAM0412	657[0n]	2	JN640247	0	0		0	Yes				04-Jun-2008	Pholetesor viminetorum	A			Canadian National Collection of Insects, Arachnids and Nematodes
ASCON	ASWAX979-08	07PROBE-23413	07PROBE-23413	BOLD:AAA5660	07PROBE-23413	657[0n]	2	GU141377	526[5n]	1	GU141563	1	Yes				23-Jul-2007	Pholetesor viminetorum	A			Biodiversity Institute of Ontario	<VERBATIM LOCALITY>|Ramsay Creek|58.754|-93.949|</VERBATIM LOCALITY>
BBHYK	BBHYK928-10	10BBCHY-2887	L#PC2010YO-172	BOLD:AAA5660	10BBCHY-2887	658[0n]	2	JN293519	0	0		1	Yes				21-Jul-2010	Pholetesor viminetorum	A	Yoho NP	Specimen in 95% Ethanol	Biodiversity Institute of Ontario	Collected from July 21-24
CNCBM	CNCHZ612-09	CAM0422	CAM0422	BOLD:AAA5660	CAM0422	657[0n]	2	JN640255	0	0		0	Yes				29-May-2008	Pholetesor viminetorum	A			Canadian National Collection of Insects, Arachnids and Nematodes
CNCBM	DSWAS916-07	HYM00000945	HYM00000945	BOLD:AAA5660	HYM00000945	657[0n]	2	JN640271	0	0		0	Yes				15-Jul-2006	Pholetesor viminetorum	A			Canadian National Collection of Insects, Arachnids and Nematodes	HYM000503
ASCON	ASWAY595-08	HYM00000814.2	HYM00000814.2		HYM00000814.2	0	0		0	0		0	No				21-Jul-1952	Pholetesor viminetorum	A			Canadian National Collection of Insects, Arachnids and Nematodes	<VERBATIM LOCALITY>|Fort Churchill|||</VERBATIM LOCALITY>
CNCBM	CNCHZ625-09	CAM0435	CAM0435	BOLD:AAA5660	CAM0435	657[0n]	2	JN640265	0	0		0	Yes				29-May-2008	Pholetesor viminetorum	A			Canadian National Collection of Insects, Arachnids and Nematodes
ASCON	DSWAS744-07	HYM00000801	HYM00000801		HYM00000801	267[0n]	1	GU141376	0	0		1	No				07-Aug-1952	Pholetesor viminetorum	A			Canadian National Collection of Insects, Arachnids and Nematodes
CNCHX	CNCHX089-09	CAM0959	CAM0959	BOLD:AAA5660	CAM0959	658[0n]	2	HM430740	0	0		0	Yes				11-Jul-2008	Pholetesor viminetorum	A			Canadian National Collection of Insects, Arachnids and Nematodes
CNCBM	DSWAS935-07	HYM00000964	HYM00000964	BOLD:AAA5660	HYM00000964	657[0n]	2	JN640273	0	0		0	Yes				06-Jul-2006	Pholetesor viminetorum	A			Canadian National Collection of Insects, Arachnids and Nematodes	HYM000522
ASCON	ASWAS993-07	HYM00000794	HYM00000794		HYM00000794	0	0		0	0		0	No				16-Jul-1952	Pholetesor viminetorum	A			Canadian National Collection of Insects, Arachnids and Nematodes
ASCON	ASWAV958-08	07PROBE-22417	07PROBE-22417	BOLD:AAA5660	07PROBE-22417	632[0n]	2	GU141339	526[5n]	1	GU141544	1	Yes				16-Jul-2007	Pholetesor viminetorum				Biodiversity Institute of Ontario	<VERBATIM LOCALITY>|Ramsay Creek|58.754|-93.949|</VERBATIM LOCALITY>
WOMIA	WOMIA360-11	GOU 0590	GOU 0590	BOLD:AAA5660	GOU 0590	658[0n]	2	JN282163	0	0		0	Yes				02-Aug-2009	Pholetesor viminetorum	A			Canadian National Collection of Insects, Arachnids and Nematodes
CNCHX	CNCHX066-09	CAM0936	CAM0936	BOLD:AAA5660	CAM0936	658[0n]	2	HM430717	0	0		0	Yes				16-Jul-2008	Pholetesor viminetorum	A			Canadian National Collection of Insects, Arachnids and Nematodes
BACW	ASWAT346-08	07PROBE-20806	07PROBE-20806	BOLD:AAA5660	07PROBE-20806	657[0n]	2	FJ414875	0	0		1	Yes				21-Jul-2007	Pholetesor viminetorum	A			Biodiversity Institute of Ontario	<VERBATIM LOCALITY>|Ramsay Creek|58.754|-93.949|</VERBATIM LOCALITY>
CNCBM	CNCHZ624-09	CAM0434	CAM0434	BOLD:AAA5660	CAM0434	613[0n]	2	JN640264	0	0		0	Yes				29-May-2008	Pholetesor viminetorum	A			Canadian National Collection of Insects, Arachnids and Nematodes
CNCHX	CNCHX078-09	CAM0948	CAM0948	BOLD:AAA5660	CAM0948	658[0n]	2	HM430729	0	0		0	Yes				13-Jul-2008	Pholetesor viminetorum	A			Canadian National Collection of Insects, Arachnids and Nematodes
ASCON	DSWAS745-07	HYM00000802	HYM00000802		HYM00000802	0	0		0	0		0	No				04-Aug-1952	Pholetesor viminetorum	A			Canadian National Collection of Insects, Arachnids and Nematodes
CNCBM	ASWAU310-08	HYM00001682	HYM00001682		HYM00001682	287[0n]	1	JN640238	0	0		0	No				05-Jul-2006	Pholetesor viminetorum	A			Canadian National Collection of Insects, Arachnids and Nematodes
CNCBM	CNCHZ611-09	CAM0421	CAM0421	BOLD:AAA5660	CAM0421	654[3n]	2	JN640254	0	0		0	Yes				29-May-2008	Pholetesor viminetorum	A			Canadian National Collection of Insects, Arachnids and Nematodes
CNCBM	CNCHZ606-09	CAM0416	CAM0416	BOLD:AAA5660	CAM0416	657[0n]	2	JN640250	0	0		0	Yes				29-May-2008	Pholetesor viminetorum	A			Canadian National Collection of Insects, Arachnids and Nematodes
ASCM	DSWAS758-07	HYM00000815			HYM00000815	0	0		0	0		0	No				01-Jan-1952	Pholetesor viminetorum	A			Canadian National Collection of Insects, Arachnids and Nematodes
CNCBM	CNCHZ618-09	CAM0428	CAM0428	BOLD:AAA5660	CAM0428	657[0n]	2	JN640259	0	0		0	Yes				29-May-2008	Pholetesor viminetorum	A			Canadian National Collection of Insects, Arachnids and Nematodes
ASCM	DSWAS759-07	HYM00000816			HYM00000816	0	0		0	0		1	No				08-May-1952	Pholetesor viminetorum	A			Canadian National Collection of Insects, Arachnids and Nematodes
BACW	ASWAT358-08	07PROBE-20818	07PROBE-20818	BOLD:AAA5660	07PROBE-20818	657[0n]	2	FJ414872	0	0		1	Yes				21-Jul-2007	Pholetesor viminetorum	A			Biodiversity Institute of Ontario	<VERBATIM LOCALITY>|Ramsay Creek|58.754|-93.949|</VERBATIM LOCALITY>
CNCBM	CNCHZ576-09	CAM0386	CAM0386	BOLD:AAA5660	CAM0386	657[0n]	2	JN640244	0	0		0	Yes				04-Jun-2008	Pholetesor viminetorum	A			Canadian National Collection of Insects, Arachnids and Nematodes
CNCBM	CNCHZ577-09	CAM0387	CAM0387	BOLD:AAA5660	CAM0387	657[0n]	2	JN640245	0	0		0	Yes				04-Jun-2008	Pholetesor viminetorum	A			Canadian National Collection of Insects, Arachnids and Nematodes
CNCHX	CNCHX074-09	CAM0944	CAM0944	BOLD:AAA5660	CAM0944	658[0n]	2	HM430725	0	0		0	Yes				13-Jul-2008	Pholetesor viminetorum	A			Canadian National Collection of Insects, Arachnids and Nematodes
HYCNF	HYCNF001-11	CNCHYM 03216			CNCHYM 03216	164[0n]	2		0	0		1	No				31-May-1961	Pholetesor viminetorum	A			Canadian National Collection of Insects, Arachnids and Nematodes
CNCHX	CNCHX082-09	CAM0952	CAM0952	BOLD:AAA5660	CAM0952	658[0n]	2	HM430733	0	0		0	Yes				10-Jul-2008	Pholetesor viminetorum	A			Canadian National Collection of Insects, Arachnids and Nematodes
ASCON	ASWAY594-08	HYM00000815.2	HYM00000815.2		HYM00000815.2	0	0		0	0		0	No				01-Jul-1952	Pholetesor viminetorum	A			Canadian National Collection of Insects, Arachnids and Nematodes	<VERBATIM LOCALITY>|Fort Churchill|||</VERBATIM LOCALITY>
CNCBM	CNCHZ616-09	CAM0426	CAM0426	BOLD:AAA5660	CAM0426	657[0n]	2	JN640257	0	0		0	Yes				29-May-2008	Pholetesor viminetorum	A			Canadian National Collection of Insects, Arachnids and Nematodes
CBRAE	JBHCH335-10	10PROBE-28643	L#10PROBE-0232	BOLD:AAA5660	10PROBE-28643	632[0n]	2	JX832848	0	0		1	Yes				16-Jul-2010	Pholetesor viminetorum	A			Biodiversity Institute of Ontario	sweep net grasses and willows beside bridge sweep net ethanol
ASCON	ASWAY598-08	HYM00000811.2	HYM00000811.2		HYM00000811.2	0	0		0	0		0	No				11-Jul-1952	Pholetesor viminetorum	A			Canadian National Collection of Insects, Arachnids and Nematodes	<VERBATIM LOCALITY>|Fort Churchill|||</VERBATIM LOCALITY>
CNCHZ	CNCHZ1139-09	CAM0492	CAM0492	BOLD:AAA5660	CAM0492	657[0n]	2	JQ846536	0	0		0	Yes				13-Jul-2008	Pholetesor viminetorum	A			Canadian National Collection of Insects, Arachnids and Nematodes
CNCHX	CNCHX075-09	CAM0945	CAM0945	BOLD:AAA5660	CAM0945	658[0n]	2	HM430726	0	0		0	Yes				13-Jul-2008	Pholetesor viminetorum	A			Canadian National Collection of Insects, Arachnids and Nematodes
CNCBM	CNCHY331-07	HYM00000603	HYM00000603	BOLD:AAA5660	HYM00000603	657[0n]	2	JN640267	0	0		0	Yes				05-Jul-2006	Pholetesor viminetorum	A			Canadian National Collection of Insects, Arachnids and Nematodes
CNCHX	CNCHX081-09	CAM0951	CAM0951	BOLD:AAA5660	CAM0951	658[0n]	2	HM430732	0	0		0	Yes				16-Jul-2008	Pholetesor viminetorum	A			Canadian National Collection of Insects, Arachnids and Nematodes
CNCBM	DSWAS960-07	HYM00000989	HYM00000989	BOLD:AAA5660	HYM00000989	657[0n]	2	JN640276	0	0		0	Yes				05-Jul-2006	Pholetesor viminetorum	A			Canadian National Collection of Insects, Arachnids and Nematodes	HYM000547
CNCHZ	CNCHZ1092-09	MIC 000900	MIC 000900	BOLD:AAA5660	MIC 000900	612[0n]	2	JQ848918	0	0		0	Yes				13-Jul-2008	Pholetesor viminetorum	A			Canadian National Collection of Insects, Arachnids and Nematodes
BACW	ASWAT348-08	07PROBE-20808	07PROBE-20808	BOLD:AAA5660	07PROBE-20808	654[0n]	2	FJ414874	0	0		1	Yes				21-Jul-2007	Pholetesor viminetorum	A			Biodiversity Institute of Ontario	<VERBATIM LOCALITY>|Ramsay Creek|58.754|-93.949|</VERBATIM LOCALITY>
CNCBM	CNCHZ555-09	CAM0365	CAM0365	BOLD:AAA5660	CAM0365	657[0n]	2	JN640239	0	0		0	Yes				29-May-2008	Pholetesor viminetorum	A			Canadian National Collection of Insects, Arachnids and Nematodes
CNCBM	CNCHZ574-09	CAM0384	CAM0384	BOLD:AAA5660	CAM0384	657[0n]	2	JN640242	0	0		0	Yes				04-Jun-2008	Pholetesor viminetorum	A			Canadian National Collection of Insects, Arachnids and Nematodes
CNCBM	CNCHZ621-09	CAM0431	CAM0431	BOLD:AAA5660	CAM0431	657[0n]	2	JN640262	0	0		0	Yes				29-May-2008	Pholetesor viminetorum	A			Canadian National Collection of Insects, Arachnids and Nematodes
HYCNF	HYCNF003-11	CNCHYM 03218			CNCHYM 03218	0	0		0	0		1	No				02-Aug-1954	Pholetesor viminetorum	A			Canadian National Collection of Insects, Arachnids and Nematodes
CNCHZ	CNCHZ913-09	MIC 000721	MIC 000721	BOLD:AAA5660	MIC 000721	631[0n]	1	JQ848849	0	0		0	No				24-Jul-2008	Pholetesor viminetorum	A			Canadian National Collection of Insects, Arachnids and Nematodes
ASCON	DSWAS746-07	HYM00000803	HYM00000803		HYM00000803	0	0		0	0		0	No				11-Jul-1952	Pholetesor viminetorum	A			Canadian National Collection of Insects, Arachnids and Nematodes
WOMIA	WOMIA359-11	GOU 0589	GOU 0589	BOLD:AAA5660	GOU 0589	658[0n]	2	JN282162	0	0		0	Yes				02-Aug-2009	Pholetesor viminetorum	A			Canadian National Collection of Insects, Arachnids and Nematodes
ASCON	ASWAY596-08	HYM00000813.2	HYM00000813.2		HYM00000813.2	0	0		0	0		0	No				11-Jul-1952	Pholetesor viminetorum	A			Canadian National Collection of Insects, Arachnids and Nematodes	<VERBATIM LOCALITY>|Fort Churchill|||</VERBATIM LOCALITY>
CNCHZ	CNCHZ1135-09	CAM0488	CAM0488	BOLD:AAA5660	CAM0488	657[0n]	2	JQ848273	0	0		0	Yes				13-Jul-2008	Pholetesor viminetorum	A			Canadian National Collection of Insects, Arachnids and Nematodes
ASCM	ASWAS991-07	HYM00000792			HYM00000792	0	1		0	0		1	No				21-Jul-1952	Pholetesor viminetorum	A			Canadian National Collection of Insects, Arachnids and Nematodes
CNCBM	DSWAS903-07	HYM00000932	HYM00000932	BOLD:AAA5660	HYM00000932	657[0n]	2	JN640269	0	0		0	Yes				15-Jul-2006	Pholetesor viminetorum	A			Canadian National Collection of Insects, Arachnids and Nematodes	HYM000490
SSWLB	SSWLB5177-13	BIOUG05353-G06	L#12BIOBUS-0614	BOLD:AAA5660	BIOUG05353-G06	555[0n]	1		0	0		0	No				24-Jun-2012	Pholetesor viminetorum		Waterton Lakes NP	museum voucher	Biodiversity Institute of Ontario
CNCHY	ASWA598-08	HYM00001312	HYM00001312	BOLD:AAA5660	HYM00001312	657[0n]	2	JQ853333	0	0		0	Yes				15-Jun-2007	Pholetesor viminetorum	A			Canadian National Collection of Insects, Arachnids and Nematodes
CNCAS	CNCHZ067-09	MIC 000350			MIC 000350	144[0n]	1	GU141630	0	0		0	No				04-Jul-1966	Pholetesor viminetorum	A			Canadian National Collection of Insects, Arachnids and Nematodes
CNCBM	DSWAS953-07	HYM00000982	HYM00000982	BOLD:AAA5660	HYM00000982	657[0n]	2	JN640275	0	0		0	Yes				06-Jul-2006	Pholetesor viminetorum	A			Canadian National Collection of Insects, Arachnids and Nematodes	HYM000540
BBHYK	BBHYK920-10	10BBCHY-2879	L#PC2010YO-172	BOLD:AAA5660	10BBCHY-2879	658[0n]	2	JN293516	0	0		1	Yes				21-Jul-2010	Pholetesor viminetorum	A	Yoho NP	Specimen in 95% Ethanol	Biodiversity Institute of Ontario	Collected from July 21-24
BBHYE	BBHYE128-10	09BBEHY-1128	L#09GM-044	BOLD:AAA5660		658[0n]	2	HM414633	0	0		1	Yes				14-Jul-2009	Pholetesor viminetorum	A	Gros Morne NP		Biodiversity Institute of Ontario	|http://www.gigapan.org/viewGigapan.php?id=29255
CNCBM	DSWAS915-07	HYM00000944	HYM00000944	BOLD:AAA5660	HYM00000944	657[0n]	2	JN640270	0	0		0	Yes				15-Jul-2006	Pholetesor viminetorum	A			Canadian National Collection of Insects, Arachnids and Nematodes	HYM000502
CNCBM	ASWA615-08	HYM00001329	HYM00001329	BOLD:AAA5660	HYM00001329	657[0n]	2	JN640237	0	0		0	Yes				02-Jun-2007	Pholetesor viminetorum	A			Canadian National Collection of Insects, Arachnids and Nematodes
CBRAD	SAHYM373-10	09PROBE-A0342	L#09PROBE-TW002-2	BOLD:AAA5660	09PROBE-A0342	658[0n]	4	HQ972443	0	0		1	Yes				31-Jul-2009	Pholetesor viminetorum	A			Biodiversity Institute of Ontario	malaise trap malaise trap
ASCON	DSWAS747-07	HYM00000804	HYM00000804		HYM00000804	0	0		0	0		0	No				21-Jul-1952	Pholetesor viminetorum	A			Canadian National Collection of Insects, Arachnids and Nematodes
CNCHV	CNCHV431-10	07PROBE-24572	07PROBE-24572	BOLD:AAA5660	07PROBE-24572	658[0n]	2	HQ558877	0	0		1	Yes				17-Jul-2007	Pholetesor viminetorum	A			Canadian National Collection of Insects, Arachnids and Nematodes
CNCBM	CNCHZ605-09	CAM0415	CAM0415	BOLD:AAA5660	CAM0415	657[0n]	2	JN640249	0	0		0	Yes				29-May-2008	Pholetesor viminetorum	A			Canadian National Collection of Insects, Arachnids and Nematodes
CNCHZ	CNCHZ915-09	MIC 000723	MIC 000723	BOLD:AAA5660	MIC 000723	657[0n]	2	JQ853785	0	0		0	Yes				24-Jul-2008	Pholetesor viminetorum	A			Canadian National Collection of Insects, Arachnids and Nematodes
ASCON	ASWAY591-08	HYM00000793.2	HYM00000793.2		HYM00000793.2	0	0		0	0		0	No				21-Jul-1952	Pholetesor viminetorum	A			Canadian National Collection of Insects, Arachnids and Nematodes	<VERBATIM LOCALITY>|Fort Churchill|||</VERBATIM LOCALITY>
ASCM	DSWAS755-07	HYM00000812			HYM00000812	0	0		0	0		1	No				07-Nov-1952	Pholetesor viminetorum	A			Canadian National Collection of Insects, Arachnids and Nematodes
ASCON	ASWAS995-07	HYM00000796	HYM00000796		HYM00000796	0	0		0	0		0	No				14-Jul-1952	Pholetesor viminetorum	A			Canadian National Collection of Insects, Arachnids and Nematodes
ASCON	ASWAS996-07	HYM00000797	HYM00000797		HYM00000797	0	1		0	0		0	No				11-Jul-1952	Pholetesor viminetorum	A			Canadian National Collection of Insects, Arachnids and Nematodes
CNCBM	CNCHZ607-09	CAM0417	CAM0417	BOLD:AAA5660	CAM0417	657[0n]	2	JN640251	0	0		0	Yes				29-May-2008	Pholetesor viminetorum	A			Canadian National Collection of Insects, Arachnids and Nematodes
BACW	ASWAT329-08	07PROBE-20789	07PROBE-20789	BOLD:AAA5660	07PROBE-20789	644[0n]	2	FJ414876	0	0		1	Yes				21-Jul-2007	Pholetesor viminetorum	A			Biodiversity Institute of Ontario	<VERBATIM LOCALITY>|Ramsay Creek|58.754|-93.949|</VERBATIM LOCALITY>
WOMIA	WOMIA358-11	GOU 0588	GOU 0588	BOLD:AAA5660	GOU 0588	658[0n]	2	JN282161	0	0		0	Yes				02-Aug-2009	Pholetesor viminetorum	A			Canadian National Collection of Insects, Arachnids and Nematodes
CNCBM	CNCHZ593-09	CAM0403	CAM0403	BOLD:AAA5660	CAM0403	657[0n]	2	JN640246	0	0		0	Yes				03-Jun-2008	Pholetesor viminetorum	A			Canadian National Collection of Insects, Arachnids and Nematodes
CNCHZ	CNCHZ914-09	MIC 000722	MIC 000722	BOLD:AAA5660	MIC 000722	657[0n]	2	JQ851770	0	0		0	Yes				24-Jul-2008	Pholetesor viminetorum	A			Canadian National Collection of Insects, Arachnids and Nematodes
CNCBM	CNCHZ609-09	CAM0419	CAM0419	BOLD:AAA5660	CAM0419	657[0n]	2	JN640253	0	0		0	Yes				29-May-2008	Pholetesor viminetorum	A			Canadian National Collection of Insects, Arachnids and Nematodes
CNCBM	CNCHZ604-09	CAM0414	CAM0414	BOLD:AAA5660	CAM0414	657[0n]	2	JN640248	0	0		0	Yes				29-May-2008	Pholetesor viminetorum	A			Canadian National Collection of Insects, Arachnids and Nematodes
CNRMF	CNRMF2687-12	BIOUG03882-B11	GMP#00243	BOLD:AAA5660	BIOUG03882-B11	624[0n]	1		0	0		0	No				23-Jul-2012	Pholetesor viminetorum	A	Riding Mountain NP	museum voucher	Biodiversity Institute of Ontario	Collected from July 16 to 23 2012
ASCM	DSWAS753-07	HYM00000810			HYM00000810	0	0		0	0		1	No				24-Jul-1952	Pholetesor viminetorum	A			Canadian National Collection of Insects, Arachnids and Nematodes
CNSLP	CNSLP346-13	BIOUG07032-G03	GMP#00142	BOLD:AAA5660	BIOUG07032-G03	560[0n]	1		0	0		0	No				02-Jul-2012	Pholetesor viminetorum		Thousand Islands NP	museum voucher	Biodiversity Institute of Ontario	Collected from June 29 to July 7 2012
CNCBM	CNCHZ620-09	CAM0430	CAM0430	BOLD:AAA5660	CAM0430	657[0n]	2	JN640261	0	0		0	Yes				29-May-2008	Pholetesor viminetorum	A			Canadian National Collection of Insects, Arachnids and Nematodes
ASCON	ASWAS999-07	HYM00000800	HYM00000800		HYM00000800	256[1n]	1	GU141375	0	0		1	No				30-Jul-1952	Pholetesor viminetorum	A			Canadian National Collection of Insects, Arachnids and Nematodes
CNCBM	CNCHZ608-09	CAM0418	CAM0418	BOLD:AAA5660	CAM0418	657[0n]	2	JN640252	0	0		0	Yes				29-May-2008	Pholetesor viminetorum	A			Canadian National Collection of Insects, Arachnids and Nematodes
CNCHZ	CNCHZ1115-09	MIC 000923	MIC 000923	BOLD:AAA5660	MIC 000923	632[0n]	2	JQ854970	0	0		0	Yes				11-Jul-2008	Pholetesor viminetorum	A			Canadian National Collection of Insects, Arachnids and Nematodes
CNCBM	CNCHZ573-09	CAM0383	CAM0383	BOLD:AAA5660	CAM0383	657[0n]	2	JN640241	0	0		0	Yes				03-Jun-2008	Pholetesor viminetorum	A			Canadian National Collection of Insects, Arachnids and Nematodes
ASCM	ASWAS992-07	HYM00000793			HYM00000793	0	0		0	0		0	No				01-Jan-1952	Pholetesor viminetorum	A			Canadian National Collection of Insects, Arachnids and Nematodes
ASCON	DSWAS751-07	HYM00000808	HYM00000808		HYM00000808	0	0		0	0		0	No				18-Jul-1952	Pholetesor viminetorum	A			Canadian National Collection of Insects, Arachnids and Nematodes
CNCBM	DSWAS933-07	HYM00000962	HYM00000962	BOLD:AAA5660	HYM00000962	657[0n]	2	JN640272	0	0		0	Yes				06-Jul-2006	Pholetesor viminetorum	A			Canadian National Collection of Insects, Arachnids and Nematodes	HYM000520
ASCM	DSWAS757-07	HYM00000814			HYM00000814	0	0		0	0		0	No				21-Jul-1952	Pholetesor viminetorum	A			Canadian National Collection of Insects, Arachnids and Nematodes
CNCHX	CNCHX083-09	CAM0953	CAM0953	BOLD:AAA5660	CAM0953	658[0n]	2	HM430734	0	0		0	Yes				10-Jul-2008	Pholetesor viminetorum	A			Canadian National Collection of Insects, Arachnids and Nematodes
CNCBM	CNCHY332-07	HYM00000604	HYM00000604	BOLD:AAA5660	HYM00000604	657[0n]	2	JN640268	0	0		0	Yes				05-Jul-2006	Pholetesor viminetorum	A			Canadian National Collection of Insects, Arachnids and Nematodes
CNCBM	CNCHZ619-09	CAM0429	CAM0429	BOLD:AAA5660	CAM0429	657[0n]	2	JN640260	0	0		0	Yes				29-May-2008	Pholetesor viminetorum	A			Canadian National Collection of Insects, Arachnids and Nematodes
CNCBM	CNCHZ572-09	CAM0382	CAM0382	BOLD:AAA5660	CAM0382	657[0n]	2	JN640240	0	0		0	Yes				03-Jun-2008	Pholetesor viminetorum	A			Canadian National Collection of Insects, Arachnids and Nematodes
CNCBM	CNCHZ575-09	CAM0385	CAM0385	BOLD:AAA5660	CAM0385	657[0n]	2	JN640243	0	0		0	Yes				04-Jun-2008	Pholetesor viminetorum	A			Canadian National Collection of Insects, Arachnids and Nematodes
BBHYM	BBHYM449-09	08BBHYM-1493	L#08BANFF-006	BOLD:AAA5660		658[0n]	2	HM374839	0	0		1	Yes				29-Jul-2008	Pholetesor viminetorum	A	Banff NP		Biodiversity Institute of Ontario
CNCBM	CNCHZ628-09	CAM0438	CAM0438	BOLD:AAA5660	CAM0438	657[0n]	2	JN640266	0	0		0	Yes				29-May-2008	Pholetesor viminetorum	A			Canadian National Collection of Insects, Arachnids and Nematodes
CNCBM	CNCHZ613-09	CAM0423	CAM0423	BOLD:AAA5660	CAM0423	657[0n]	2	JN640256	0	0		0	Yes				29-May-2008	Pholetesor viminetorum	A			Canadian National Collection of Insects, Arachnids and Nematodes
CNRME	CNRME2000-12	BIOUG03593-B08	GMP#00241	BOLD:AAA5660	BIOUG03593-B08	613[0n]	1		0	0		0	No				09-Jul-2012	Pholetesor viminetorum	A	Riding Mountain NP	museum voucher	Biodiversity Institute of Ontario	Collected from July 2 to 9 2012
ASCM	ASWAS966-07	HYM00000767	HYM00000767		HYM00000767	0	0		0	0		0	No				21-Jun-1952	Pholetesor viminetorum	A			Canadian National Collection of Insects, Arachnids and Nematodes
ASCON	DSWAS760-07	HYM00000817	HYM00000817		HYM00000817	0	0		0	0		0	No				09-Jul-1952	Pholetesor viminetorum	A			Canadian National Collection of Insects, Arachnids and Nematodes
ASCON	DSWAS748-07	HYM00000805	HYM00000805		HYM00000805	0	0		0	0		0	No				16-Jul-1952	Pholetesor viminetorum	A			Canadian National Collection of Insects, Arachnids and Nematodes
ASCM	DSWAS752-07	HYM00000809			HYM00000809	0	0		0	0		1	No				07-Nov-1952	Pholetesor viminetorum	A			Canadian National Collection of Insects, Arachnids and Nematodes
ASCM	DSWAS754-07	HYM00000811			HYM00000811	0	0		0	0		0	No				07-Dec-1952	Pholetesor viminetorum	A			Canadian National Collection of Insects, Arachnids and Nematodes
CNCBM	CNCHZ622-09	CAM0432	CAM0432	BOLD:AAA5660	CAM0432	657[0n]	2	JN640263	0	0		0	Yes				29-May-2008	Pholetesor viminetorum	A			Canadian National Collection of Insects, Arachnids and Nematodes
ASCM	DSWAS864-07	HYM00000921			HYM00000921	0	0		0	0		1	No				28-Jul-1952	Pholetesor viminetorum	A			Canadian National Collection of Insects, Arachnids and Nematodes
CNCHZ	CNCHZ1101-09	MIC 000909	MIC 000909	BOLD:AAA5660	MIC 000909	657[0n]	2	JQ851100	0	0		0	Yes				16-Jul-2008	Pholetesor viminetorum	A			Canadian National Collection of Insects, Arachnids and Nematodes
CNCHX	CNCHX087-09	CAM0957	CAM0957	BOLD:AAA5660	CAM0957	658[0n]	2	HM430738	0	0		0	Yes				10-Jul-2008	Pholetesor viminetorum	A			Canadian National Collection of Insects, Arachnids and Nematodes
CNCHX	CNCHX085-09	CAM0955	CAM0955	BOLD:AAA5660	CAM0955	658[0n]	2	HM430736	0	0		0	Yes				13-Jul-2008	Pholetesor viminetorum	A			Canadian National Collection of Insects, Arachnids and Nematodes
ASCON	ASWAS998-07	HYM00000799	HYM00000799		HYM00000799	0	0		0	0		0	No				11-Jul-1952	Pholetesor viminetorum	A			Canadian National Collection of Insects, Arachnids and Nematodes
CNCAS	ASWAY592-08	HYM00000921.2	HYM00000921.2		HYM00000921.2	144[0n]	1	GU141818	0	0		0	No				28-Jul-1952	Pholetesor viminetorum	A			Canadian National Collection of Insects, Arachnids and Nematodes
ASCON	DSWAS750-07	HYM00000807	HYM00000807		HYM00000807	0	0		0	0		0	No				23-Jul-1952	Pholetesor viminetorum	A			Canadian National Collection of Insects, Arachnids and Nematodes

## Sheet: Vouchers
Project:	SEARCH: Sample ids(633 ids), Include public records			User :	Jose Leonardo Fernandez Triana
Created :	24-September-2014
Sample ID	Field ID	Museum ID	Collection Code	Institution Storing
CAM0023	CAM0023	CAM0023	CAM	Canadian National Collection of Insects, Arachnids and Nematodes
BIOUG01088-A03	L#JSETM-028	BIOUG01088-A03	BIOUG	Biodiversity Institute of Ontario
CAM0036	CAM0036	CAM0036	CAM	Canadian National Collection of Insects, Arachnids and Nematodes
MIC 000034		MIC 000034	CNC-HYM	Canadian National Collection of Insects, Arachnids and Nematodes
MIC 000041		MIC 000041	CNC-HYM	Canadian National Collection of Insects, Arachnids and Nematodes
MIC 000036		MIC 000036	CNC-HYM	Canadian National Collection of Insects, Arachnids and Nematodes
BIOUG01631-B09	L#11JSETM-018		BIOUG	Biodiversity Institute of Ontario
CAM0104	CAM0104	CAM0104	CAM	Canadian National Collection of Insects, Arachnids and Nematodes
MIC 000035		MIC 000035	CNC-HYM	Canadian National Collection of Insects, Arachnids and Nematodes
CNCHYM 00081		CNCHYM 00081	CNC	Canadian National Collection of Insects, Arachnids and Nematodes
CAM0117	CAM0117	CAM0117	CAM	Canadian National Collection of Insects, Arachnids and Nematodes
CAM0021	CAM0021	CAM0021	CAM	Canadian National Collection of Insects, Arachnids and Nematodes
CAM0046	CAM0046	CAM0046	CAM	Canadian National Collection of Insects, Arachnids and Nematodes
MIC 000040		MIC 000040	CNC-HYM	Canadian National Collection of Insects, Arachnids and Nematodes
CAM0053	CAM0053	CAM0053	CAM	Canadian National Collection of Insects, Arachnids and Nematodes
CAM0063	CAM0063	CAM0063	CAM	Canadian National Collection of Insects, Arachnids and Nematodes
CAM0020	CAM0020	CAM0020	CAM	Canadian National Collection of Insects, Arachnids and Nematodes
CAM0058	CAM0058	CAM0058	CAM	Canadian National Collection of Insects, Arachnids and Nematodes
CAM0026	CAM0026	CAM0026	CAM	Canadian National Collection of Insects, Arachnids and Nematodes
CAM0049	CAM0049	CAM0049	CAM	Canadian National Collection of Insects, Arachnids and Nematodes
MIC 000037		MIC 000037	CNC-HYM	Canadian National Collection of Insects, Arachnids and Nematodes
MIC 000033		MIC 000033	CNC-HYM	Canadian National Collection of Insects, Arachnids and Nematodes
MIC 000038		MIC 000038	CNC-HYM	Canadian National Collection of Insects, Arachnids and Nematodes
CAM0042	CAM0042	CAM0042	CAM	Canadian National Collection of Insects, Arachnids and Nematodes
CNCHYM 00088		CNCHYM 00088	CNC	Canadian National Collection of Insects, Arachnids and Nematodes
MIC 000908	MIC 000908	MIC 000908	MIC	Canadian National Collection of Insects, Arachnids and Nematodes
BIOUG10353-H05	GMP#01452	BIOUG10353-H05	BIOUG	Biodiversity Institute of Ontario
MIC 000905	MIC 000905	MIC 000905	MIC	Canadian National Collection of Insects, Arachnids and Nematodes
BIOUG00989-E12	MAS919-10	BIOUG00989-E12	BIOUG	Research Collection of M. Alex Smith
BIOUG01252-E11	L#JSETM-032	BIOUG01252-E11	BIOUG	Biodiversity Institute of Ontario
BIOUG07019-B11	GMP#00284	BIOUG07019-B11	BIOUG	Biodiversity Institute of Ontario
BIOUG10403-A09	GMP#01452	BIOUG10403-A09	BIOUG	Biodiversity Institute of Ontario
MIC 000063		MIC 000063	CNC-HYM	Canadian National Collection of Insects, Arachnids and Nematodes
BIOUG10360-E02	GMP#01452	BIOUG10360-E02	BIOUG	Biodiversity Institute of Ontario
BIOUG10358-C12	GMP#01452	BIOUG10358-C12	BIOUG	Biodiversity Institute of Ontario
BIOUG00989-F01	MAS919-10	BIOUG00989-F01	BIOUG	Research Collection of M. Alex Smith
BIOUG11905-C04	GMP#01450	BIOUG11905-C04	BIOUG	Biodiversity Institute of Ontario
MIC 000902	MIC 000902	MIC 000902	MIC	Canadian National Collection of Insects, Arachnids and Nematodes
MIC 000058		MIC 000058	CNC-HYM	Canadian National Collection of Insects, Arachnids and Nematodes
CAM0096	CAM0096	CAM0096	CAM	Canadian National Collection of Insects, Arachnids and Nematodes
BIOUG11907-E10	GMP#01450	BIOUG11907-E10	BIOUG	Biodiversity Institute of Ontario
CAM1013	CAM1013	CAM1013	CAM	Canadian National Collection of Insects, Arachnids and Nematodes
BIOUG01631-H02	L#11JSETM-021		BIOUG	Biodiversity Institute of Ontario
CNCHYM 00089		CNCHYM 00089	CNC	Canadian National Collection of Insects, Arachnids and Nematodes
BIOUG04245-B10	GMP#00285	BIOUG04245-B10	BIOUG	Biodiversity Institute of Ontario
BIOUG00989-E09	MAS919-10	BIOUG00989-E09	BIOUG	Research Collection of M. Alex Smith
BIOUG11904-F02	GMP#01450	BIOUG11904-F02	BIOUG	Biodiversity Institute of Ontario
10BBCHY-2243	L#PC2010PA-260	10BBCHY-2243	BIOUG	Biodiversity Institute of Ontario
MIC 000600	MIC 000600	MIC 000600	MIC	Canadian National Collection of Insects, Arachnids and Nematodes
PCPP10-0759	L#10PCPP-0379	PCPP10-0759	BIOUG	Biodiversity Institute of Ontario
BIOUG11909-G05	GMP#01450	BIOUG11909-G05	BIOUG	Biodiversity Institute of Ontario
BIOUG00991-A05	MAS1000-10	BIOUG00991-A05	BIOUG	Research Collection of M. Alex Smith
BIOUG00914-E04	MAS1121-10	BIOUG00914-E04	BIOUG	Research Collection of M. Alex Smith
BIOUG00914-E03	MAS1121-10	BIOUG00914-E03	BIOUG	Research Collection of M. Alex Smith
BIOUG10961-E03	GMP#01362	BIOUG10961-E03	BIOUG	Biodiversity Institute of Ontario
BIOUG08661-F09	GMP#02213	BIOUG08661-F09	BIOUG	Biodiversity Institute of Ontario
BIOUG07067-E03	GMP#00287	BIOUG07067-E03	BIOUG	Biodiversity Institute of Ontario
BIOUG01280-G04	L#JSETM-047	BIOUG01280-G04	BIOUG	Biodiversity Institute of Ontario
CAM0160	CAM0160	CAM0160	CAM	Canadian National Collection of Insects, Arachnids and Nematodes
BIOUG06873-E09	GMP#00284	BIOUG06873-E09	BIOUG	Biodiversity Institute of Ontario
BIOUG12293-G01	GMP#01458	BIOUG12293-G01	BIOUG	Biodiversity Institute of Ontario
BIOUG10408-B06	GMP#01452	BIOUG10408-B06	BIOUG	Biodiversity Institute of Ontario
BIOUG00989-E11	MAS919-10	BIOUG00989-E11	BIOUG	Research Collection of M. Alex Smith
BIOUG10358-E06	GMP#01452	BIOUG10358-E06	BIOUG	Biodiversity Institute of Ontario
BIOUG00861-G06	L#PHPUS-028	BIOUG00861-G06	BIOUG	Biodiversity Institute of Ontario
BIOUG10550-D04	GMP#01456	BIOUG10550-D04	BIOUG	Biodiversity Institute of Ontario
BIOUG02507-D09	L#PHPUS-024		BIOUG	Biodiversity Institute of Ontario
BIOUG10403-A08	GMP#01452	BIOUG10403-A08	BIOUG	Biodiversity Institute of Ontario
BIOUG00914-E07	MAS1121-10	BIOUG00914-E07	BIOUG	Research Collection of M. Alex Smith
CAM0147	CAM0147	CAM0147	CAM	Canadian National Collection of Insects, Arachnids and Nematodes
BIOUG00988-A09	MAS1029-10	BIOUG00988-A09	BIOUG	Research Collection of M. Alex Smith
BIOUG11910-C01	GMP#01450	BIOUG11910-C01	BIOUG	Biodiversity Institute of Ontario
BIOUG04245-A01	GMP#00285	BIOUG04245-A01	BIOUG	Biodiversity Institute of Ontario
BIOUG00914-F08	MAS1121-10	BIOUG00914-F08	BIOUG	Research Collection of M. Alex Smith
BIOUG10661-F02	GMP#01456	BIOUG10661-F02	BIOUG	Biodiversity Institute of Ontario
BIOUG11910-B12	GMP#01450	BIOUG11910-B12	BIOUG	Biodiversity Institute of Ontario
CNCHYM 00093		CNCHYM 00093	CNC	Canadian National Collection of Insects, Arachnids and Nematodes
CAM0005	CAM0005	CAM0005	CAM	Canadian National Collection of Insects, Arachnids and Nematodes
CAM0085	CAM0085	CAM0085	CAM	Canadian National Collection of Insects, Arachnids and Nematodes
BIOUG00989-A08	MAS1029-10	BIOUG00989-A08	BIOUG	Research Collection of M. Alex Smith
BIOUG08192-F10	L#12BIOBUS-0944	BIOUG08192-F10	BIOUG	Biodiversity Institute of Ontario
BIOUG01330-D09	L#JSETM-058	BIOUG01330-D09	BIOUG	Biodiversity Institute of Ontario
BIOUG10353-G01	GMP#01452	BIOUG10353-G01	BIOUG	Biodiversity Institute of Ontario
BIOUG00914-G01	MAS1121-10	BIOUG00914-G01	BIOUG	Research Collection of M. Alex Smith
BIOUG07067-C07	GMP#00284	BIOUG07067-C07	BIOUG	Biodiversity Institute of Ontario
BIOUG12037-E03	GMP#01454	BIOUG12037-E03	BIOUG	Biodiversity Institute of Ontario
MIC 000061		MIC 000061	CNC-HYM	Canadian National Collection of Insects, Arachnids and Nematodes
BIOUG00989-E10	MAS919-10	BIOUG00989-E10	BIOUG	Research Collection of M. Alex Smith
BIOUG10405-G04	GMP#01452	BIOUG10405-G04	BIOUG	Biodiversity Institute of Ontario
MIC 000060		MIC 000060	CNC-HYM	Canadian National Collection of Insects, Arachnids and Nematodes
CAM0159	CAM0159	CAM0159	CAM	Canadian National Collection of Insects, Arachnids and Nematodes
BIOUG13530-A05	L#12BIOBUS-2522	BIOUG13530-A05	BIOUG	Biodiversity Institute of Ontario
BIOUG00914-F06	MAS1121-10	BIOUG00914-F06	BIOUG	Research Collection of M. Alex Smith
CNCHYM 03970		CNCHYM 03970	CNC	Canadian National Collection of Insects, Arachnids and Nematodes
BIOUG04245-C02	GMP#00285	BIOUG04245-C02	BIOUG	Biodiversity Institute of Ontario
BIOUG00989-G12	MAS919-10	BIOUG00989-G12	BIOUG	Research Collection of M. Alex Smith
BIOUG01309-D01	L#PHPUS-026	BIOUG01309-D01	BIOUG	Biodiversity Institute of Ontario
BIOUG00914-E08	MAS1121-10	BIOUG00914-E08	BIOUG	Research Collection of M. Alex Smith
BIOUG11908-H02	GMP#01450	BIOUG11908-H02	BIOUG	Biodiversity Institute of Ontario
BIOUG11903-A01	GMP#01450	BIOUG11903-A01	BIOUG	Biodiversity Institute of Ontario
BIOUG12293-B06	GMP#01458	BIOUG12293-B06	BIOUG	Biodiversity Institute of Ontario
BIOUG10405-C03	GMP#01452	BIOUG10405-C03	BIOUG	Biodiversity Institute of Ontario
BIOUG06873-G07	GMP#00284	BIOUG06873-G07	BIOUG	Biodiversity Institute of Ontario
MIC 000059		MIC 000059	CNC-HYM	Canadian National Collection of Insects, Arachnids and Nematodes
CNCHYM 00090		CNCHYM 00090	CNC	Canadian National Collection of Insects, Arachnids and Nematodes
MIC 000064		MIC 000064	CNC-HYM	Canadian National Collection of Insects, Arachnids and Nematodes
BIOUG11904-C07	GMP#01450	BIOUG11904-C07	BIOUG	Biodiversity Institute of Ontario
BIOUG00991-B06	MAS912-10	BIOUG00991-B06	BIOUG	Research Collection of M. Alex Smith
BIOUG09238-D12	L#12BIOBUS-0997	BIOUG09238-D12	BIOUG	Biodiversity Institute of Ontario
BIOUG12038-B01	GMP#01454	BIOUG12038-B01	BIOUG	Biodiversity Institute of Ontario
BIOUG00989-A07	MAS1029-10	BIOUG00989-A07	BIOUG	Research Collection of M. Alex Smith
BIOUG10479-G03	GMP#01452	BIOUG10479-G03	BIOUG	Biodiversity Institute of Ontario
BIOUG11908-G11	GMP#01450	BIOUG11908-G11	BIOUG	Biodiversity Institute of Ontario
BIOUG03486-E11	GMP#00285	BIOUG03486-E11	BIOUG	Biodiversity Institute of Ontario
WMIC 0240	WMIC 0240	WMIC 0240	WMIC	Canadian National Collection of Insects, Arachnids and Nematodes
BIOUG04245-B04	GMP#00285	BIOUG04245-B04	BIOUG	Biodiversity Institute of Ontario
MIC 000062		MIC 000062	CNC-HYM	Canadian National Collection of Insects, Arachnids and Nematodes
BIOUG11907-B04	GMP#01450	BIOUG11907-B04	BIOUG	Biodiversity Institute of Ontario
BIOUG01327-H05	L#JSETM-056	BIOUG01327-H05	BIOUG	Biodiversity Institute of Ontario
BIOUG11625-E04	GMP#01510	BIOUG11625-E04	BIOUG	Biodiversity Institute of Ontario
BIOUG01657-E06	L#11NCC-02	BIOUG01657-E06	BIOUG	Biodiversity Institute of Ontario
07PROBE-22328	07PROBE-22328	07PROBE-22328	07PROBE	Biodiversity Institute of Ontario
BIOUG11759-F05	GMP#01276	BIOUG11759-F05	BIOUG	Biodiversity Institute of Ontario
CAM0960	CAM0960	CAM0960	CAM	Canadian National Collection of Insects, Arachnids and Nematodes
BIOUG14172-C09	GMP#01512	BIOUG14172-C09	BIOUG	Biodiversity Institute of Ontario
BIOUG01631-D07	L#11JSETM-021		BIOUG	Biodiversity Institute of Ontario
BIOUG08683-C10	GMP#02132	BIOUG08683-C10	BIOUG	Biodiversity Institute of Ontario
BIOUG14172-G04	GMP#01512	BIOUG14172-G04	BIOUG	Biodiversity Institute of Ontario
CAM0009	CAM0009	CAM0009	CAM	Canadian National Collection of Insects, Arachnids and Nematodes
BIOUG08669-D07	GMP#00956	BIOUG08669-D07	BIOUG	Biodiversity Institute of Ontario
CAM0940	CAM0940	CAM0940	CAM	Canadian National Collection of Insects, Arachnids and Nematodes
MIC 000087		MIC 000087	CNC-HYM	Canadian National Collection of Insects, Arachnids and Nematodes
BIOUG08641-D09	GMP#02150	BIOUG08641-D09	BIOUG	Biodiversity Institute of Ontario
BIOUG08683-G07	GMP#02132	BIOUG08683-G07	BIOUG	Biodiversity Institute of Ontario
BIOUG08663-H08	GMP#02164	BIOUG08663-H08	BIOUG	Biodiversity Institute of Ontario
BIOUG09765-A01	GMP#01070	BIOUG09765-A01	BIOUG	Biodiversity Institute of Ontario
BIOUG08683-C04	GMP#02132	BIOUG08683-C04	BIOUG	Biodiversity Institute of Ontario
BIOUG14108-F04	GMP#01512	BIOUG14108-F04	BIOUG	Biodiversity Institute of Ontario
BIOUG08647-G04	GMP#02168	BIOUG08647-G04	BIOUG	Biodiversity Institute of Ontario
BIOUG09932-C07	GMP#02134	BIOUG09932-C07	BIOUG	Biodiversity Institute of Ontario
HYM00001023	HYM00001023	HYM00001023	CNC-HYM	Canadian National Collection of Insects, Arachnids and Nematodes
BIOUG10202-A04	GMP#01544	BIOUG10202-A04	BIOUG	Biodiversity Institute of Ontario
CAM0342	CAM0342	CAM0342	CAM	Canadian National Collection of Insects, Arachnids and Nematodes
MIC 000903	MIC 000903	MIC 000903	MIC	Canadian National Collection of Insects, Arachnids and Nematodes
BIOUG11707-A06	GMP#01510	BIOUG11707-A06	BIOUG	Biodiversity Institute of Ontario
HYM00001022	HYM00001022	HYM00001022	CNC-HYM	Canadian National Collection of Insects, Arachnids and Nematodes
BIOUG06823-D09	GMP#00138	BIOUG06823-D09	BIOUG	Biodiversity Institute of Ontario
BIOUG08647-C01	GMP#02168	BIOUG08647-C01	BIOUG	Biodiversity Institute of Ontario
MIC 000910	MIC 000910	MIC 000910	MIC	Canadian National Collection of Insects, Arachnids and Nematodes
CAM0526	CAM0526	CAM0526	CAM	Canadian National Collection of Insects, Arachnids and Nematodes
CAM0962	CAM0962	CAM0962	CAM	Canadian National Collection of Insects, Arachnids and Nematodes
MIC 000493	MIC 000493	MIC 000493	MIC	Canadian National Collection of Insects, Arachnids and Nematodes
BIOUG06549-D07	GMP#00437	BIOUG06549-D07	BIOUG	Biodiversity Institute of Ontario
BIOUG03220-A01	GMP#00171	BIOUG03220-A01	BIOUG	Biodiversity Institute of Ontario
CAM0290	CAM0290	CAM0290	CAM	Canadian National Collection of Insects, Arachnids and Nematodes
MIC 000637	MIC 000637	MIC 000637	MIC	Canadian National Collection of Insects, Arachnids and Nematodes
CAM0011	CAM0011	CAM0011	CAM	Canadian National Collection of Insects, Arachnids and Nematodes
HYM00001027	HYM00001027	HYM00001027	CNC-HYM	Canadian National Collection of Insects, Arachnids and Nematodes
BIOUG06823-E10	GMP#00138	BIOUG06823-E10	BIOUG	Biodiversity Institute of Ontario
CAM0939	CAM0939	CAM0939	CAM	Canadian National Collection of Insects, Arachnids and Nematodes
BIOUG11771-G06	GMP#01510	BIOUG11771-G06	BIOUG	Biodiversity Institute of Ontario
BIOUG08748-E07	GMP#00958	BIOUG08748-E07	BIOUG	Biodiversity Institute of Ontario
CAM0352	CAM0352	CAM0352	CAM	Canadian National Collection of Insects, Arachnids and Nematodes
CAM0448	CAM0448	CAM0448	CAM	Canadian National Collection of Insects, Arachnids and Nematodes
BIOUG09807-F11	GMP#02130	BIOUG09807-F11	BIOUG	Biodiversity Institute of Ontario
BIOUG06471-C10	L#12BIOBUS-1330	BIOUG06471-C10	BIOUG	Biodiversity Institute of Ontario
CNCH3194	CNCH3194	CNCH3194	CNCH	Canadian National Collection of Insects, Arachnids and Nematodes
BIOUG03220-F05	GMP#00171	BIOUG03220-F05	BIOUG	Biodiversity Institute of Ontario
CAM0289	CAM0289	CAM0289	CAM	Canadian National Collection of Insects, Arachnids and Nematodes
BIOUG01657-F10	L#11NCC-02	BIOUG01657-F10	BIOUG	Biodiversity Institute of Ontario
CAM0344	CAM0344	CAM0344	CAM	Canadian National Collection of Insects, Arachnids and Nematodes
HYM00001003	HYM00001003	HYM00001003	CNC-HYM	Canadian National Collection of Insects, Arachnids and Nematodes
CAM0525	CAM0525	CAM0525	CAM	Canadian National Collection of Insects, Arachnids and Nematodes
BIOUG08643-F01	GMP#02170	BIOUG08643-F01	BIOUG	Biodiversity Institute of Ontario
MIC 000090		MIC 000090	CNC-HYM	Canadian National Collection of Insects, Arachnids and Nematodes
BIOUG00761-A09	L#10PROBE-0565	BIOUG00761-A09	BIOUG	Biodiversity Institute of Ontario
HYM00000665.2	HYM00000665.2	HYM00000665.2	HYM	Canadian National Collection of Insects, Arachnids and Nematodes
BIOUG09925-E09	GMP#02132	BIOUG09925-E09	BIOUG	Biodiversity Institute of Ontario
MIC 000084		MIC 000084	CNC-HYM	Canadian National Collection of Insects, Arachnids and Nematodes
BIOUG01572-H03	L#11NCC-01	BIOUG01572-H03	BIOUG	Biodiversity Institute of Ontario
CAM0114	CAM0114	CAM0114	CAM	Canadian National Collection of Insects, Arachnids and Nematodes
BIOUG14107-D02	GMP#01512	BIOUG14107-D02	BIOUG	Biodiversity Institute of Ontario
CAM0345	CAM0345	CAM0345	CAM	Canadian National Collection of Insects, Arachnids and Nematodes
CAM0963	CAM0963	CAM0963	CAM	Canadian National Collection of Insects, Arachnids and Nematodes
CAM0288	CAM0288	CAM0288	CAM	Canadian National Collection of Insects, Arachnids and Nematodes
CAM0341	CAM0341	CAM0341	CAM	Canadian National Collection of Insects, Arachnids and Nematodes
CAM0106	CAM0106	CAM0106	CAM	Canadian National Collection of Insects, Arachnids and Nematodes
BIOUG06823-E06	GMP#00138	BIOUG06823-E06	BIOUG	Biodiversity Institute of Ontario
HYM00001019	HYM00001019	HYM00001019	CNC-HYM	Canadian National Collection of Insects, Arachnids and Nematodes
CAM0154	CAM0154	CAM0154	CAM	Canadian National Collection of Insects, Arachnids and Nematodes
CAM0340	CAM0340	CAM0340	CAM	Canadian National Collection of Insects, Arachnids and Nematodes
HYM00001028	HYM00001028	HYM00001028	CNC-HYM	Canadian National Collection of Insects, Arachnids and Nematodes
HYM00001024	HYM00001024	HYM00001024	CNC-HYM	Canadian National Collection of Insects, Arachnids and Nematodes
CAM0161	CAM0161	CAM0161	CAM	Canadian National Collection of Insects, Arachnids and Nematodes
BIOUG12486-D10	GMP#01104	BIOUG12486-D10	BIOUG	Biodiversity Institute of Ontario
PCPP10-0466	L#10PCPP-0516	PCPP10-0466	BIOUG	Biodiversity Institute of Ontario
BIOUG12736-B05	GMP#01274	BIOUG12736-B05	BIOUG	Biodiversity Institute of Ontario
10BBHYM-1225	L#2010FL-118	10BBHYM-1225	BIOUG	Biodiversity Institute of Ontario
HYM00001004	HYM00001004	HYM00001004	CNC-HYM	Canadian National Collection of Insects, Arachnids and Nematodes
CAM0008	CAM0008	CAM0008	CAM	Canadian National Collection of Insects, Arachnids and Nematodes
BIOUG08799-G08	GMP#00958	BIOUG08799-G08	BIOUG	Biodiversity Institute of Ontario
CAM0521	CAM0521	CAM0521	CAM	Canadian National Collection of Insects, Arachnids and Nematodes
BIOUG04041-A02	GMP#00145	BIOUG04041-A02		Biodiversity Institute of Ontario
BIOUG03979-A07	GMP#00139	BIOUG03979-A07	BIOUG	Biodiversity Institute of Ontario
BIOUG03979-B04	GMP#00139	BIOUG03979-B04	BIOUG	Biodiversity Institute of Ontario
BIOUG00991-B03	MAS801-10	BIOUG00991-B03	BIOUG	Research Collection of M. Alex Smith
CAM0166	CAM0166	CAM0166	CAM	Canadian National Collection of Insects, Arachnids and Nematodes
CAM0103	CAM0103	CAM0103	CAM	Canadian National Collection of Insects, Arachnids and Nematodes
BIOUG07898-C04	ON13-C0056	BIOUG07898-C04	BIOUG	Biodiversity Institute of Ontario
BIOUG09931-A07	GMP#02134	BIOUG09931-A07	BIOUG	Biodiversity Institute of Ontario
BIOUG12977-D11	GMP#01036	BIOUG12977-D11	BIOUG	Biodiversity Institute of Ontario
BIOUG08641-G07	GMP#02150	BIOUG08641-G07	BIOUG	Biodiversity Institute of Ontario
CNCHYM 00107		CNCHYM 00107	CNC	Canadian National Collection of Insects, Arachnids and Nematodes
CAM0938	CAM0938	CAM0938	CAM	Canadian National Collection of Insects, Arachnids and Nematodes
CAM0348	CAM0348	CAM0348	CAM	Canadian National Collection of Insects, Arachnids and Nematodes
BIOUG08647-G07	GMP#02168	BIOUG08647-G07	BIOUG	Biodiversity Institute of Ontario
BIOUG03979-B03	GMP#00139	BIOUG03979-B03	BIOUG	Biodiversity Institute of Ontario
CAM0346	CAM0346	CAM0346	CAM	Canadian National Collection of Insects, Arachnids and Nematodes
BIOUG01795-D07	L#11NCC-08	BIOUG01795-D07	BIOUG	Biodiversity Institute of Ontario
BIOUG11996-F03	GMP#01514	BIOUG11996-F03	BIOUG	Biodiversity Institute of Ontario
BIOUG11597-E04	GMP#01270	BIOUG11597-E04	BIOUG	Biodiversity Institute of Ontario
CAM0445	CAM0445	CAM0445	CAM	Canadian National Collection of Insects, Arachnids and Nematodes
BIOUG07903-F12	ON13-C0063	BIOUG07903-F12	BIOUG	Biodiversity Institute of Ontario
CAM0527	CAM0527	CAM0527	CAM	Canadian National Collection of Insects, Arachnids and Nematodes
BIOUG01657-C11	L#11NCC-02	BIOUG01657-C11	BIOUG	Biodiversity Institute of Ontario
09BBEHY-2030	L#09KC-117			Biodiversity Institute of Ontario
BIOUG09770-A04	GMP#01074	BIOUG09770-A04	BIOUG	Biodiversity Institute of Ontario
CAM0531	CAM0531	CAM0531	CAM	Canadian National Collection of Insects, Arachnids and Nematodes
CAM0007	CAM0007	CAM0007	CAM	Canadian National Collection of Insects, Arachnids and Nematodes
BIOUG12487-D03	GMP#01104	BIOUG12487-D03	BIOUG	Biodiversity Institute of Ontario
MIC 000086		MIC 000086	CNC-HYM	Canadian National Collection of Insects, Arachnids and Nematodes
ASGLE-0880	MAS997-09	ASGLE-0880	BIOUG	Research Collection of M. Alex Smith
BIOUG03887-F12	GMP#00141	BIOUG03887-F12	BIOUG	Biodiversity Institute of Ontario
BIOUG08665-D12	GMP#02164	BIOUG08665-D12	BIOUG	Biodiversity Institute of Ontario
BIOUG09515-E11	GMP#00966	BIOUG09515-E11	BIOUG	Biodiversity Institute of Ontario
CAM0022	CAM0022	CAM0022	CAM	Canadian National Collection of Insects, Arachnids and Nematodes
CAM0446	CAM0446	CAM0446	CAM	Canadian National Collection of Insects, Arachnids and Nematodes
BIOUG01631-A09	L#11JSETM-018		BIOUG	Biodiversity Institute of Ontario
CAM0635	CAM0635	CAM0635	CAM	Canadian National Collection of Insects, Arachnids and Nematodes
CAM0335	CAM0335	CAM0335	CAM	Canadian National Collection of Insects, Arachnids and Nematodes
GOU 0570	GOU 0570	GOU 0570	GOU	Canadian National Collection of Insects, Arachnids and Nematodes
BIOUG07902-D08	ON13-C0063	BIOUG07902-D08	BIOUG	Biodiversity Institute of Ontario
HYM00001026	HYM00001026	HYM00001026	CNC-HYM	Canadian National Collection of Insects, Arachnids and Nematodes
CAM0523	CAM0523	CAM0523	CAM	Canadian National Collection of Insects, Arachnids and Nematodes
CAM0356	CAM0356	CAM0356	CAM	Canadian National Collection of Insects, Arachnids and Nematodes
CNCH1358	CNCH1358	CNCH1358	CNCH	Canadian National Collection of Insects, Arachnids and Nematodes
MIC 000083		MIC 000083	CNC-HYM	Canadian National Collection of Insects, Arachnids and Nematodes
BIOUG12977-D01	GMP#01036	BIOUG12977-D01	BIOUG	Biodiversity Institute of Ontario
BIOUG11331-F04	GMP#01542	BIOUG11331-F04	BIOUG	Biodiversity Institute of Ontario
BIOUG03863-G08	GMP#00139	BIOUG03863-G08	BIOUG	Biodiversity Institute of Ontario
BIOUG09765-B03	GMP#01070	BIOUG09765-B03	BIOUG	Biodiversity Institute of Ontario
CAM0410	CAM0410	CAM0410	CAM	Canadian National Collection of Insects, Arachnids and Nematodes
CAM0113	CAM0113	CAM0113	CAM	Canadian National Collection of Insects, Arachnids and Nematodes
WMIC 0517	WMIC 0517	WMIC 0517	WMIC	Canadian National Collection of Insects, Arachnids and Nematodes
BIOUG11999-F03	GMP#01514	BIOUG11999-F03	BIOUG	Biodiversity Institute of Ontario
BIOUG00726-B07	L#10PROBE-0469	BIOUG00726-B07	BIOUG	Biodiversity Institute of Ontario
CAM0151	CAM0151	CAM0151	CAM	Canadian National Collection of Insects, Arachnids and Nematodes
CAM0524	CAM0524	CAM0524	CAM	Canadian National Collection of Insects, Arachnids and Nematodes
BIOUG03123-B05	GMP#00133	BIOUG03123-B05	BIOUG	Biodiversity Institute of Ontario
CAM0013	CAM0013	CAM0013	CAM	Canadian National Collection of Insects, Arachnids and Nematodes
MIC 000082		MIC 000082	CNC-HYM	Canadian National Collection of Insects, Arachnids and Nematodes
BIOUG14171-B01	GMP#01512	BIOUG14171-B01	BIOUG	Biodiversity Institute of Ontario
CAM0942	CAM0942	CAM0942	CAM	Canadian National Collection of Insects, Arachnids and Nematodes
BIOUG09803-F06	GMP#02130	BIOUG09803-F06	BIOUG	Biodiversity Institute of Ontario
BIOUG07004-C04	GMP#00143	BIOUG07004-C04	BIOUG	Biodiversity Institute of Ontario
CAM0529	CAM0529	CAM0529	CAM	Canadian National Collection of Insects, Arachnids and Nematodes
CAM0074	CAM0074	CAM0074	CAM	Canadian National Collection of Insects, Arachnids and Nematodes
BIOUG06823-E08	GMP#00138	BIOUG06823-E08	BIOUG	Biodiversity Institute of Ontario
BIOUG08665-A11	GMP#02164	BIOUG08665-A11	BIOUG	Biodiversity Institute of Ontario
BIOUG01631-G11	L#11JSETM-021		BIOUG	Biodiversity Institute of Ontario
BIOUG12974-A03	GMP#01036	BIOUG12974-A03	BIOUG	Biodiversity Institute of Ontario
CAM0447	CAM0447	CAM0447	CAM	Canadian National Collection of Insects, Arachnids and Nematodes
BIOUG01597-F04	L#11JSETM-018		BIOUG	Biodiversity Institute of Ontario
BIOUG08647-D01	GMP#02168	BIOUG08647-D01	BIOUG	Biodiversity Institute of Ontario
BIOUG01657-F02	L#11NCC-02	BIOUG01657-F02	BIOUG	Biodiversity Institute of Ontario
BIOUG09765-A12	GMP#01070	BIOUG09765-A12	BIOUG	Biodiversity Institute of Ontario
BIOUG03979-H08	GMP#00141	BIOUG03979-H08	BIOUG	Biodiversity Institute of Ontario
CAM0350	CAM0350	CAM0350	CAM	Canadian National Collection of Insects, Arachnids and Nematodes
BIOUG03931-F01	GMP#00185	BIOUG03931-F01	BIOUG	Biodiversity Institute of Ontario
BIOUG09930-G10	GMP#02134	BIOUG09930-G10	BIOUG	Biodiversity Institute of Ontario
BIOUG08648-H10	GMP#02168	BIOUG08648-H10	BIOUG	Biodiversity Institute of Ontario
BIOUG08752-A08	GMP#01072	BIOUG08752-A08	BIOUG	Biodiversity Institute of Ontario
BIOUG12497-F12	GMP#01105	BIOUG12497-F12	BIOUG	Biodiversity Institute of Ontario
BIOUG08665-F02	GMP#02164	BIOUG08665-F02	BIOUG	Biodiversity Institute of Ontario
BIOUG09930-E06	GMP#02134	BIOUG09930-E06	BIOUG	Biodiversity Institute of Ontario
CAM0120	CAM0120	CAM0120	CAM	Canadian National Collection of Insects, Arachnids and Nematodes
BIOUG01661-E11	L#11NCC-02	BIOUG01661-E11	BIOUG	Biodiversity Institute of Ontario
BIOUG09765-A06	GMP#01070	BIOUG09765-A06	BIOUG	Biodiversity Institute of Ontario
CAM0389	CAM0389	CAM0389	CAM	Canadian National Collection of Insects, Arachnids and Nematodes
HYM00001020	HYM00001020	HYM00001020	CNC-HYM	Canadian National Collection of Insects, Arachnids and Nematodes
CAM0286	CAM0286	CAM0286	CAM	Canadian National Collection of Insects, Arachnids and Nematodes
CAM0163	CAM0163	CAM0163	CAM	Canadian National Collection of Insects, Arachnids and Nematodes
CAM0351	CAM0351	CAM0351	CAM	Canadian National Collection of Insects, Arachnids and Nematodes
TDWG-0384	L#2010WH-0144	TDWG-0384	BIOUG	Biodiversity Institute of Ontario
CAM0413	CAM0413	CAM0413	CAM	Canadian National Collection of Insects, Arachnids and Nematodes
BIOUG06823-D07	GMP#00138	BIOUG06823-D07	BIOUG	Biodiversity Institute of Ontario
CNCHYM 00106		CNCHYM 00106	CNC	Canadian National Collection of Insects, Arachnids and Nematodes
BIOUG08499-C11	GMP#02142	BIOUG08499-C11	BIOUG	Biodiversity Institute of Ontario
CAM0360	CAM0360	CAM0360	CAM	Canadian National Collection of Insects, Arachnids and Nematodes
CAM0349	CAM0349	CAM0349	CAM	Canadian National Collection of Insects, Arachnids and Nematodes
CAM0115	CAM0115	CAM0115	CAM	Canadian National Collection of Insects, Arachnids and Nematodes
MIC 000085		MIC 000085	CNC-HYM	Canadian National Collection of Insects, Arachnids and Nematodes
BIOUG03979-G06	GMP#00141	BIOUG03979-G06	BIOUG	Biodiversity Institute of Ontario
CAM0964	CAM0964	CAM0964	CAM	Canadian National Collection of Insects, Arachnids and Nematodes
CAM0025	CAM0025	CAM0025	CAM	Canadian National Collection of Insects, Arachnids and Nematodes
MIC 000088		MIC 000088	CNC-HYM	Canadian National Collection of Insects, Arachnids and Nematodes
BIOUG08807-A09	GMP#00958	BIOUG08807-A09	BIOUG	Biodiversity Institute of Ontario
CAM0101	CAM0101	CAM0101	CAM	Canadian National Collection of Insects, Arachnids and Nematodes
BIOUG09925-F01	GMP#02132	BIOUG09925-F01	BIOUG	Biodiversity Institute of Ontario
BIOUG09345-D07	GMP#00964	BIOUG09345-D07	BIOUG	Biodiversity Institute of Ontario
BIOUG09925-A01	GMP#02132	BIOUG09925-A01	BIOUG	Biodiversity Institute of Ontario
BIOUG14261-G11	GMP#01034	BIOUG14261-G11	BIOUG	Biodiversity Institute of Ontario
CAM0062	CAM0062	CAM0062	CAM	Canadian National Collection of Insects, Arachnids and Nematodes
BIOUG08665-D10	GMP#02164	BIOUG08665-D10	BIOUG	Biodiversity Institute of Ontario
CAM0076	CAM0076	CAM0076	CAM	Canadian National Collection of Insects, Arachnids and Nematodes
BIOUG11771-G09	GMP#01510	BIOUG11771-G09	BIOUG	Biodiversity Institute of Ontario
BIOUG09807-D05	GMP#02130	BIOUG09807-D05	BIOUG	Biodiversity Institute of Ontario
CAM0530	CAM0530	CAM0530	CAM	Canadian National Collection of Insects, Arachnids and Nematodes
HYM00001021	HYM00001021	HYM00001021	CNC-HYM	Canadian National Collection of Insects, Arachnids and Nematodes
CAM0528	CAM0528	CAM0528	CAM	Canadian National Collection of Insects, Arachnids and Nematodes
10BBCHY-1304	L#PC2010PA-182	10BBCHY-1304	BIOUG	Biodiversity Institute of Ontario
CNCH1025	CNCH1025	CNCH1025	CNCH	Canadian National Collection of Insects, Arachnids and Nematodes
CAM0399	CAM0399	CAM0399	CAM	Canadian National Collection of Insects, Arachnids and Nematodes
BIOUG07902-D06	ON13-C0063	BIOUG07902-D06	BIOUG	Biodiversity Institute of Ontario
MIC 000089		MIC 000089	CNC-HYM	Canadian National Collection of Insects, Arachnids and Nematodes
BIOUG01631-A05	L#11JSETM-018		BIOUG	Biodiversity Institute of Ontario
CAM0941	CAM0941	CAM0941	CAM	Canadian National Collection of Insects, Arachnids and Nematodes
CAM0961	CAM0961	CAM0961	CAM	Canadian National Collection of Insects, Arachnids and Nematodes
BIOUG10641-G12	GMP#01526	BIOUG10641-G12	BIOUG	Biodiversity Institute of Ontario
BIOUG09631-C02	GMP#00966	BIOUG09631-C02	BIOUG	Biodiversity Institute of Ontario
BIOUG14099-G10	GMP#01512	BIOUG14099-G10	BIOUG	Biodiversity Institute of Ontario
BIOUG11758-F08	GMP#01276	BIOUG11758-F08	BIOUG	Biodiversity Institute of Ontario
10BBCHY-1305	L#PC2010PA-182	10BBCHY-1305	BIOUG	Biodiversity Institute of Ontario
CAM0522	CAM0522	CAM0522	CAM	Canadian National Collection of Insects, Arachnids and Nematodes
CAM0347	CAM0347	CAM0347	CAM	Canadian National Collection of Insects, Arachnids and Nematodes
CNCHYM 00105		CNCHYM 00105	CNC	Canadian National Collection of Insects, Arachnids and Nematodes
BIOUG14170-E05	GMP#01512	BIOUG14170-E05	BIOUG	Biodiversity Institute of Ontario
CAM0054	CAM0054	CAM0054	CAM	Canadian National Collection of Insects, Arachnids and Nematodes
HYM00000665		HYM00000665	CNC-HYM	Canadian National Collection of Insects, Arachnids and Nematodes
BIOUG08749-G01	GMP#01072	BIOUG08749-G01	BIOUG	Biodiversity Institute of Ontario
TDWG-0167	L#2010WH-0074	TDWG-0167	BIOUG	Biodiversity Institute of Ontario
07PROBE-23393	07PROBE-23393	07PROBE-23393	07PROBE	Biodiversity Institute of Ontario
BIOUG07902-D03	ON13-C0063	BIOUG07902-D03	BIOUG	Biodiversity Institute of Ontario
CAM0099	CAM0099	CAM0099	CAM	Canadian National Collection of Insects, Arachnids and Nematodes
BIOUG08565-E09	GMP#02158	BIOUG08565-E09	BIOUG	Biodiversity Institute of Ontario
MIC 000666	MIC 000666	MIC 000666	MIC	Canadian National Collection of Insects, Arachnids and Nematodes
CAM0146	CAM0146	CAM0146	CAM	Canadian National Collection of Insects, Arachnids and Nematodes
BIOUG09801-C03	GMP#00968	BIOUG09801-C03	BIOUG	Biodiversity Institute of Ontario
MIC 000488	MIC 000488	MIC 000488	MIC	Canadian National Collection of Insects, Arachnids and Nematodes
BIOUG01572-D01	L#11NCC-01	BIOUG01572-D01	BIOUG	Biodiversity Institute of Ontario
HYM00001025	HYM00001025	HYM00001025	CNC-HYM	Canadian National Collection of Insects, Arachnids and Nematodes
CAM0072	CAM0072	CAM0072	CAM	Canadian National Collection of Insects, Arachnids and Nematodes
CAM0024	CAM0024	CAM0024	CAM	Canadian National Collection of Insects, Arachnids and Nematodes
BIOUG11726-F01	GMP#01542	BIOUG11726-F01	BIOUG	Biodiversity Institute of Ontario
BIOUG12460-D06	GMP#01104	BIOUG12460-D06	BIOUG	Biodiversity Institute of Ontario
BIOUG09930-G04	GMP#02134	BIOUG09930-G04	BIOUG	Biodiversity Institute of Ontario
BIOUG03863-E06	GMP#00137	BIOUG03863-E06		Biodiversity Institute of Ontario
CAM0039	CAM0039	CAM0039	CAM	Canadian National Collection of Insects, Arachnids and Nematodes
CAM0409	CAM0409	CAM0409	CAM	Canadian National Collection of Insects, Arachnids and Nematodes
CBRA0492	CBRA0492	CBRA0492	CBRA	Canadian National Collection of Insects, Arachnids and Nematodes
CBRA0493	CBRA0493	CBRA0493	CBRA	Canadian National Collection of Insects, Arachnids and Nematodes
CNCHYM 00215		CNCHYM 00215	CNC	Canadian National Collection of Insects, Arachnids and Nematodes
CBRA0491	CBRA0491	CBRA0491	CBRA	Canadian National Collection of Insects, Arachnids and Nematodes
MIC 000009		MIC 000009	CNC-HYM	Canadian National Collection of Insects, Arachnids and Nematodes
CBRA0490	CBRA0490	CBRA0490	CBRA	Canadian National Collection of Insects, Arachnids and Nematodes
MIC 000007		MIC 000007	CNC-HYM	Canadian National Collection of Insects, Arachnids and Nematodes
MIC 000013		MIC 000013	CNC-HYM	Canadian National Collection of Insects, Arachnids and Nematodes
MIC 000010		MIC 000010	CNC-HYM	Canadian National Collection of Insects, Arachnids and Nematodes
MIC 000011		MIC 000011	CNC-HYM	Canadian National Collection of Insects, Arachnids and Nematodes
MIC 000014		MIC 000014	CNC-HYM	Canadian National Collection of Insects, Arachnids and Nematodes
MIC 000005		MIC 000005	CNC-HYM	Canadian National Collection of Insects, Arachnids and Nematodes
CBRA0495	CBRA0495	CBRA0495	CBRA	Canadian National Collection of Insects, Arachnids and Nematodes
CBRA0494	CBRA0494	CBRA0494	CBRA	Canadian National Collection of Insects, Arachnids and Nematodes
MIC 000012		MIC 000012	CNC-HYM	Canadian National Collection of Insects, Arachnids and Nematodes
MIC 000006		MIC 000006	CNC-HYM	Canadian National Collection of Insects, Arachnids and Nematodes
MIC 000008		MIC 000008	CNC-HYM	Canadian National Collection of Insects, Arachnids and Nematodes
BIOUG10637-H02	GMP#01156	BIOUG10637-H02	BIOUG	Biodiversity Institute of Ontario
07PROBE-22321	07PROBE-22321	07PROBE-22321	07PROBE	Biodiversity Institute of Ontario
BIOUG04486-G10	GMP#00261	BIOUG04486-G10	BIOUG	Biodiversity Institute of Ontario
MIC 000638	MIC 000638	MIC 000638	MIC	Canadian National Collection of Insects, Arachnids and Nematodes
07PROBE-20921	07PROBE-20921	07PROBE-20921	07PROBE	Biodiversity Institute of Ontario
CNCHYM 00401		CNCHYM 00401	CNC	Canadian National Collection of Insects, Arachnids and Nematodes
BIOUG08665-E05	GMP#02164	BIOUG08665-E05	BIOUG	Biodiversity Institute of Ontario
BIOUG01258-H06	L#JSETM-042	BIOUG01258-H06	BIOUG	Biodiversity Institute of Ontario
CAM0542	CAM0542	CAM0542	CAM	Canadian National Collection of Insects, Arachnids and Nematodes
BIOUG08742-H10	GMP#00958	BIOUG08742-H10	BIOUG	Biodiversity Institute of Ontario
CNCHYM 00404		CNCHYM 00404	CNC	Canadian National Collection of Insects, Arachnids and Nematodes
CNCHYM 00403		CNCHYM 00403	CNC	Canadian National Collection of Insects, Arachnids and Nematodes
CNCHYM 00402		CNCHYM 00402	CNC	Canadian National Collection of Insects, Arachnids and Nematodes
CAM1034	CAM1034	CAM1034	CAM	Canadian National Collection of Insects, Arachnids and Nematodes
BIOUG03438-B06	GMP#00173	BIOUG03438-B06	BIOUG	Biodiversity Institute of Ontario
CAM0893	CAM0893	CAM0893	CAM	Canadian National Collection of Insects, Arachnids and Nematodes
BIOUG03445-F01	GMP#00175	BIOUG03445-F01	BIOUG	Biodiversity Institute of Ontario
CNCHYM 01091		CNCHYM 01091	CNC	Canadian National Collection of Insects, Arachnids and Nematodes
CNCHYM 01093		CNCHYM 01093	CNC	Canadian National Collection of Insects, Arachnids and Nematodes
CNCHYM 01089		CNCHYM 01089	CNC	Canadian National Collection of Insects, Arachnids and Nematodes
CNCHYM 00216		CNCHYM 00216	CNC	Canadian National Collection of Insects, Arachnids and Nematodes
CNCHYM 01363		CNCHYM 01363	CNC	Canadian National Collection of Insects, Arachnids and Nematodes
CNCHYM 01366		CNCHYM 01366	CNC	Canadian National Collection of Insects, Arachnids and Nematodes
CNCHYM 01375		CNCHYM 01375	CNC	Canadian National Collection of Insects, Arachnids and Nematodes
GOU 0314	GOU 0314	GOU 0314	GOU	Canadian National Collection of Insects, Arachnids and Nematodes
CNCHYM 01365		CNCHYM 01365	CNC	Canadian National Collection of Insects, Arachnids and Nematodes
CAM0473	CAM0473	CAM0473	CAM	Canadian National Collection of Insects, Arachnids and Nematodes
CNCHYM 01369		CNCHYM 01369	CNC	Canadian National Collection of Insects, Arachnids and Nematodes
CAM0470	CAM0470	CAM0470	CAM	Canadian National Collection of Insects, Arachnids and Nematodes
CAM0471	CAM0471	CAM0471	CAM	Canadian National Collection of Insects, Arachnids and Nematodes
CAM0468	CAM0468	CAM0468	CAM	Canadian National Collection of Insects, Arachnids and Nematodes
CNCHYM 01370		CNCHYM 01370	CNC	Canadian National Collection of Insects, Arachnids and Nematodes
CAM0463	CAM0463	CAM0463	CAM	Canadian National Collection of Insects, Arachnids and Nematodes
CAM0465	CAM0465	CAM0465	CAM	Canadian National Collection of Insects, Arachnids and Nematodes
CAM0464	CAM0464	CAM0464	CAM	Canadian National Collection of Insects, Arachnids and Nematodes
CNCHYM 01368		CNCHYM 01368	CNC	Canadian National Collection of Insects, Arachnids and Nematodes
CNCHYM 01367		CNCHYM 01367	CNC	Canadian National Collection of Insects, Arachnids and Nematodes
CAM0462	CAM0462	CAM0462	CAM	Canadian National Collection of Insects, Arachnids and Nematodes
CNCHYM 01371		CNCHYM 01371	CNC	Canadian National Collection of Insects, Arachnids and Nematodes
CAM0469	CAM0469	CAM0469	CAM	Canadian National Collection of Insects, Arachnids and Nematodes
CNCHYM 01376		CNCHYM 01376	CNC	Canadian National Collection of Insects, Arachnids and Nematodes
CNCHYM 01364		CNCHYM 01364	CNC	Canadian National Collection of Insects, Arachnids and Nematodes
CNCHYM 01377		CNCHYM 01377	CNC	Canadian National Collection of Insects, Arachnids and Nematodes
CNCHYM 01378		CNCHYM 01378	CNC	Canadian National Collection of Insects, Arachnids and Nematodes
BIOUG01082-E12	L#JSETM-028	BIOUG01082-E12	BIOUG	Biodiversity Institute of Ontario
CAM0474	CAM0474	CAM0474	CAM	Canadian National Collection of Insects, Arachnids and Nematodes
CAM0466	CAM0466	CAM0466	CAM	Canadian National Collection of Insects, Arachnids and Nematodes
CAM0472	CAM0472	CAM0472	CAM	Canadian National Collection of Insects, Arachnids and Nematodes
CAM0467	CAM0467	CAM0467	CAM	Canadian National Collection of Insects, Arachnids and Nematodes
CAM0278	CAM0278	CAM0278	CAM	Canadian National Collection of Insects, Arachnids and Nematodes
BIOUG04442-A12	L#12BIOBUS-1249	BIOUG04442-A12	BIOUG	Biodiversity Institute of Ontario
HYM00000958	HYM00000958	HYM00000958	CNC-HYM	Canadian National Collection of Insects, Arachnids and Nematodes
CNCH3205	CNCH3205	CNCH3205	CNCH	Canadian National Collection of Insects, Arachnids and Nematodes
HYM00000818	HYM00000818	HYM00000818	HYM	Canadian National Collection of Insects, Arachnids and Nematodes
CNCH3212	CNCH3212	CNCH3212	CNCH	Canadian National Collection of Insects, Arachnids and Nematodes
BIOUG07357-A10	GMP#01949	BIOUG07357-A10	BIOUG	Biodiversity Institute of Ontario
HYM00000994	HYM00000994	HYM00000994	CNC-HYM	Canadian National Collection of Insects, Arachnids and Nematodes
HYM00000974	HYM00000974	HYM00000974	CNC-HYM	Canadian National Collection of Insects, Arachnids and Nematodes
HYM00000953	HYM00000953	HYM00000953	CNC-HYM	Canadian National Collection of Insects, Arachnids and Nematodes
HYM00000821.2	HYM00000821.2	HYM00000821.2	HYM	Canadian National Collection of Insects, Arachnids and Nematodes
CNCHYM 03136		CNCHYM 03136	CNC	Canadian National Collection of Insects, Arachnids and Nematodes
HYM00000821		HYM00000821	CNC-HYM	Canadian National Collection of Insects, Arachnids and Nematodes
HYM00000941	HYM00000941	HYM00000941	CNC-HYM	Canadian National Collection of Insects, Arachnids and Nematodes
CNCH3209	CNCH3209	CNCH3209	CNCH	Canadian National Collection of Insects, Arachnids and Nematodes
CNCH3215	CNCH3215	CNCH3215	CNCH	Canadian National Collection of Insects, Arachnids and Nematodes
CNCHYM 03143		CNCHYM 03143	CNC	Canadian National Collection of Insects, Arachnids and Nematodes
HYM00000996	HYM00000996	HYM00000996	CNC-HYM	Canadian National Collection of Insects, Arachnids and Nematodes
CNCH0955	CNCH0955	CNCH0955	CNCH	Canadian National Collection of Insects, Arachnids and Nematodes
HYM00000948	HYM00000948	HYM00000948	CNC-HYM	Canadian National Collection of Insects, Arachnids and Nematodes
CNCH3208	CNCH3208	CNCH3208	CNCH	Canadian National Collection of Insects, Arachnids and Nematodes
HYM00000986	HYM00000986	HYM00000986	CNC-HYM	Canadian National Collection of Insects, Arachnids and Nematodes
HYM00000820		HYM00000820	CNC-HYM	Canadian National Collection of Insects, Arachnids and Nematodes
HYM00000971	HYM00000971	HYM00000971	CNC-HYM	Canadian National Collection of Insects, Arachnids and Nematodes
HYM00000955	HYM00000955	HYM00000955	CNC-HYM	Canadian National Collection of Insects, Arachnids and Nematodes
CNCH3306	CNCH3306	CNCH3306	CNCH	Canadian National Collection of Insects, Arachnids and Nematodes
HYM00000972	HYM00000972	HYM00000972	CNC-HYM	Canadian National Collection of Insects, Arachnids and Nematodes
HYM00000947	HYM00000947	HYM00000947	CNC-HYM	Canadian National Collection of Insects, Arachnids and Nematodes
CNCH3310	CNCH3310	CNCH3310	CNCH	Canadian National Collection of Insects, Arachnids and Nematodes
HYM00000931	HYM00000931	HYM00000931	CNC-HYM	Canadian National Collection of Insects, Arachnids and Nematodes
HYM00000985	HYM00000985	HYM00000985	CNC-HYM	Canadian National Collection of Insects, Arachnids and Nematodes
CNCH3203	CNCH3203	CNCH3203	CNCH	Canadian National Collection of Insects, Arachnids and Nematodes
CNCHYM 03141		CNCHYM 03141	CNC	Canadian National Collection of Insects, Arachnids and Nematodes
CNCH0995	CNCH0995	CNCH0995	CNCH	Canadian National Collection of Insects, Arachnids and Nematodes
HYM00000331	HYM00000331	HYM00000331		Canadian National Collection of Insects, Arachnids and Nematodes
HYM00000939	HYM00000939	HYM00000939	CNC-HYM	Canadian National Collection of Insects, Arachnids and Nematodes
HYM00000969	HYM00000969	HYM00000969	CNC-HYM	Canadian National Collection of Insects, Arachnids and Nematodes
CNCH0993	CNCH0993	CNCH0993	CNCH	Canadian National Collection of Insects, Arachnids and Nematodes
CNCHYM 03145		CNCHYM 03145	CNC	Canadian National Collection of Insects, Arachnids and Nematodes
HYM00000819	HYM00000819	HYM00000819	HYM	Canadian National Collection of Insects, Arachnids and Nematodes
CNCHYM 03138		CNCHYM 03138	CNC	Canadian National Collection of Insects, Arachnids and Nematodes
CNCH3204	CNCH3204	CNCH3204	CNCH	Canadian National Collection of Insects, Arachnids and Nematodes
CNCH3213	CNCH3213	CNCH3213	CNCH	Canadian National Collection of Insects, Arachnids and Nematodes
BIOUG00989-E07	MAS919-10	BIOUG00989-E07	BIOUG	Research Collection of M. Alex Smith
BIOUG03931-A10	GMP#00185	BIOUG03931-A10	BIOUG	Biodiversity Institute of Ontario
CNCH0965	CNCH0965	CNCH0965	CNCH	Canadian National Collection of Insects, Arachnids and Nematodes
HYM00001322	HYM00001322	HYM00001322	CNC-HYM	Canadian National Collection of Insects, Arachnids and Nematodes
CAM0437	CAM0437	CAM0437	CAM	Canadian National Collection of Insects, Arachnids and Nematodes
HYM00000990	HYM00000990	HYM00000990	CNC-HYM	Canadian National Collection of Insects, Arachnids and Nematodes
CNCHYM 03139		CNCHYM 03139	CNC	Canadian National Collection of Insects, Arachnids and Nematodes
HYM00000975	HYM00000975	HYM00000975	CNC-HYM	Canadian National Collection of Insects, Arachnids and Nematodes
CNCH3206	CNCH3206	CNCH3206	CNCH	Canadian National Collection of Insects, Arachnids and Nematodes
HYM00000935	HYM00000935	HYM00000935	CNC-HYM	Canadian National Collection of Insects, Arachnids and Nematodes
CNCH1008	CNCH1008	CNCH1008	CNCH	Canadian National Collection of Insects, Arachnids and Nematodes
HYM00000987	HYM00000987	HYM00000987	CNC-HYM	Canadian National Collection of Insects, Arachnids and Nematodes
CNCH0987	CNCH0987	CNCH0987	CNCH	Canadian National Collection of Insects, Arachnids and Nematodes
08BBHYM-1368	L#08GRAS-031			Biodiversity Institute of Ontario
HYM00000968	HYM00000968	HYM00000968	CNC-HYM	Canadian National Collection of Insects, Arachnids and Nematodes
CNCHYM 03144		CNCHYM 03144	CNC	Canadian National Collection of Insects, Arachnids and Nematodes
HYM00000936	HYM00000936	HYM00000936	CNC-HYM	Canadian National Collection of Insects, Arachnids and Nematodes
HYM00000951	HYM00000951	HYM00000951	CNC-HYM	Canadian National Collection of Insects, Arachnids and Nematodes
HYM00001320	HYM00001320	HYM00001320	CNC-HYM	Canadian National Collection of Insects, Arachnids and Nematodes
HYM00000920	HYM00000920	HYM00000920	HYM	Canadian National Collection of Insects, Arachnids and Nematodes
CNCHYM 03137		CNCHYM 03137	CNC	Canadian National Collection of Insects, Arachnids and Nematodes
HYM00000820.2	HYM00000820.2	HYM00000820.2	HYM	Canadian National Collection of Insects, Arachnids and Nematodes
HYM00000976	HYM00000976	HYM00000976	CNC-HYM	Canadian National Collection of Insects, Arachnids and Nematodes
HYM00000943	HYM00000943	HYM00000943	CNC-HYM	Canadian National Collection of Insects, Arachnids and Nematodes
HYM00000934	HYM00000934	HYM00000934	CNC-HYM	Canadian National Collection of Insects, Arachnids and Nematodes
HYM00000938	HYM00000938	HYM00000938	CNC-HYM	Canadian National Collection of Insects, Arachnids and Nematodes
HYM00000950	HYM00000950	HYM00000950	CNC-HYM	Canadian National Collection of Insects, Arachnids and Nematodes
HYM00000956	HYM00000956	HYM00000956	CNC-HYM	Canadian National Collection of Insects, Arachnids and Nematodes
HYM00000973	HYM00000973	HYM00000973	CNC-HYM	Canadian National Collection of Insects, Arachnids and Nematodes
HYM00000970	HYM00000970	HYM00000970	CNC-HYM	Canadian National Collection of Insects, Arachnids and Nematodes
HYM00000940	HYM00000940	HYM00000940	CNC-HYM	Canadian National Collection of Insects, Arachnids and Nematodes
CNCHYM 03142		CNCHYM 03142	CNC	Canadian National Collection of Insects, Arachnids and Nematodes
HYM00000942	HYM00000942	HYM00000942	CNC-HYM	Canadian National Collection of Insects, Arachnids and Nematodes
CNCHYM 03140		CNCHYM 03140	CNC	Canadian National Collection of Insects, Arachnids and Nematodes
07PROBE-20072	07PROBE-20072	07PROBE-20072	07PROBE	Biodiversity Institute of Ontario
CNCHYM 03217		CNCHYM 03217	CNC	Canadian National Collection of Insects, Arachnids and Nematodes
HYM00000806	HYM00000806	HYM00000806	HYM	Canadian National Collection of Insects, Arachnids and Nematodes
07PROBE-22423	07PROBE-22423	07PROBE-22423	07PROBE	Biodiversity Institute of Ontario
BIOUG14184-G04	L#13BIOBUS-0656	BIOUG14184-G04	BIOUG	Biodiversity Institute of Ontario
HYM00000809.2	HYM00000809.2	HYM00000809.2	HYM	Canadian National Collection of Insects, Arachnids and Nematodes
10PROBE-29276	L#10PROBE-0284	10PROBE-29276	BIOUG	Biodiversity Institute of Ontario
HYM00000798	HYM00000798	HYM00000798	HYM	Canadian National Collection of Insects, Arachnids and Nematodes
CAM0958	CAM0958	CAM0958	CAM	Canadian National Collection of Insects, Arachnids and Nematodes
HYM00000981	HYM00000981	HYM00000981	CNC-HYM	Canadian National Collection of Insects, Arachnids and Nematodes
BIOUG03191-A01	GMP#00411	BIOUG03191-A01	BIOUG	Biodiversity Institute of Ontario
HYM00000792.2	HYM00000792.2	HYM00000792.2	HYM	Canadian National Collection of Insects, Arachnids and Nematodes
CAM0427	CAM0427	CAM0427	CAM	Canadian National Collection of Insects, Arachnids and Nematodes
HYM00000795	HYM00000795	HYM00000795	HYM	Canadian National Collection of Insects, Arachnids and Nematodes
HYM00000813		HYM00000813	CNC-HYM	Canadian National Collection of Insects, Arachnids and Nematodes
GOU 0582	GOU 0582	GOU 0582	GOU	Canadian National Collection of Insects, Arachnids and Nematodes
07PROBE-23399	07PROBE-23399	07PROBE-23399	07PROBE	Biodiversity Institute of Ontario
HYM00000922	HYM00000922	HYM00000922	HYM	Canadian National Collection of Insects, Arachnids and Nematodes
CAM0412	CAM0412	CAM0412	CAM	Canadian National Collection of Insects, Arachnids and Nematodes
07PROBE-23413	07PROBE-23413	07PROBE-23413	07PROBE	Biodiversity Institute of Ontario
10BBCHY-2887	L#PC2010YO-172	10BBCHY-2887	BIOUG	Biodiversity Institute of Ontario
CAM0422	CAM0422	CAM0422	CAM	Canadian National Collection of Insects, Arachnids and Nematodes
HYM00000945	HYM00000945	HYM00000945	CNC-HYM	Canadian National Collection of Insects, Arachnids and Nematodes
HYM00000814.2	HYM00000814.2	HYM00000814.2	HYM	Canadian National Collection of Insects, Arachnids and Nematodes
CAM0435	CAM0435	CAM0435	CAM	Canadian National Collection of Insects, Arachnids and Nematodes
HYM00000801	HYM00000801	HYM00000801	HYM	Canadian National Collection of Insects, Arachnids and Nematodes
CAM0959	CAM0959	CAM0959	CAM	Canadian National Collection of Insects, Arachnids and Nematodes
HYM00000964	HYM00000964	HYM00000964	CNC-HYM	Canadian National Collection of Insects, Arachnids and Nematodes
HYM00000794	HYM00000794	HYM00000794	HYM	Canadian National Collection of Insects, Arachnids and Nematodes
07PROBE-22417	07PROBE-22417	07PROBE-22417	07PROBE	Biodiversity Institute of Ontario
GOU 0590	GOU 0590	GOU 0590	GOU	Canadian National Collection of Insects, Arachnids and Nematodes
CAM0936	CAM0936	CAM0936	CAM	Canadian National Collection of Insects, Arachnids and Nematodes
07PROBE-20806	07PROBE-20806	07PROBE-20806	07PROBE	Biodiversity Institute of Ontario
CAM0434	CAM0434	CAM0434	CAM	Canadian National Collection of Insects, Arachnids and Nematodes
CAM0948	CAM0948	CAM0948	CAM	Canadian National Collection of Insects, Arachnids and Nematodes
HYM00000802	HYM00000802	HYM00000802	HYM	Canadian National Collection of Insects, Arachnids and Nematodes
HYM00001682	HYM00001682	HYM00001682		Canadian National Collection of Insects, Arachnids and Nematodes
CAM0421	CAM0421	CAM0421	CAM	Canadian National Collection of Insects, Arachnids and Nematodes
CAM0416	CAM0416	CAM0416	CAM	Canadian National Collection of Insects, Arachnids and Nematodes
HYM00000815		HYM00000815	CNC-HYM	Canadian National Collection of Insects, Arachnids and Nematodes
CAM0428	CAM0428	CAM0428	CAM	Canadian National Collection of Insects, Arachnids and Nematodes
HYM00000816		HYM00000816	CNC-HYM	Canadian National Collection of Insects, Arachnids and Nematodes
07PROBE-20818	07PROBE-20818	07PROBE-20818	07PROBE	Biodiversity Institute of Ontario
CAM0386	CAM0386	CAM0386	CAM	Canadian National Collection of Insects, Arachnids and Nematodes
CAM0387	CAM0387	CAM0387	CAM	Canadian National Collection of Insects, Arachnids and Nematodes
CAM0944	CAM0944	CAM0944	CAM	Canadian National Collection of Insects, Arachnids and Nematodes
CNCHYM 03216		CNCHYM 03216	CNC	Canadian National Collection of Insects, Arachnids and Nematodes
CAM0952	CAM0952	CAM0952	CAM	Canadian National Collection of Insects, Arachnids and Nematodes
HYM00000815.2	HYM00000815.2	HYM00000815.2	HYM	Canadian National Collection of Insects, Arachnids and Nematodes
CAM0426	CAM0426	CAM0426	CAM	Canadian National Collection of Insects, Arachnids and Nematodes
10PROBE-28643	L#10PROBE-0232	10PROBE-28643	BIOUG	Biodiversity Institute of Ontario
HYM00000811.2	HYM00000811.2	HYM00000811.2	HYM	Canadian National Collection of Insects, Arachnids and Nematodes
CAM0492	CAM0492	CAM0492	CAM	Canadian National Collection of Insects, Arachnids and Nematodes
CAM0945	CAM0945	CAM0945	CAM	Canadian National Collection of Insects, Arachnids and Nematodes
HYM00000603	HYM00000603	HYM00000603	CNC-HYM	Canadian National Collection of Insects, Arachnids and Nematodes
CAM0951	CAM0951	CAM0951	CAM	Canadian National Collection of Insects, Arachnids and Nematodes
HYM00000989	HYM00000989	HYM00000989	CNC-HYM	Canadian National Collection of Insects, Arachnids and Nematodes
MIC 000900	MIC 000900	MIC 000900	MIC	Canadian National Collection of Insects, Arachnids and Nematodes
07PROBE-20808	07PROBE-20808	07PROBE-20808	07PROBE	Biodiversity Institute of Ontario
CAM0365	CAM0365	CAM0365	CAM	Canadian National Collection of Insects, Arachnids and Nematodes
CAM0384	CAM0384	CAM0384	CAM	Canadian National Collection of Insects, Arachnids and Nematodes
CAM0431	CAM0431	CAM0431	CAM	Canadian National Collection of Insects, Arachnids and Nematodes
CNCHYM 03218		CNCHYM 03218	CNC	Canadian National Collection of Insects, Arachnids and Nematodes
MIC 000721	MIC 000721	MIC 000721	MIC	Canadian National Collection of Insects, Arachnids and Nematodes
HYM00000803	HYM00000803	HYM00000803	HYM	Canadian National Collection of Insects, Arachnids and Nematodes
GOU 0589	GOU 0589	GOU 0589	GOU	Canadian National Collection of Insects, Arachnids and Nematodes
HYM00000813.2	HYM00000813.2	HYM00000813.2	HYM	Canadian National Collection of Insects, Arachnids and Nematodes
CAM0488	CAM0488	CAM0488	CAM	Canadian National Collection of Insects, Arachnids and Nematodes
HYM00000792		HYM00000792	CNC-HYM	Canadian National Collection of Insects, Arachnids and Nematodes
HYM00000932	HYM00000932	HYM00000932	CNC-HYM	Canadian National Collection of Insects, Arachnids and Nematodes
BIOUG05353-G06	L#12BIOBUS-0614	BIOUG05353-G06	BIOUG	Biodiversity Institute of Ontario
HYM00001312	HYM00001312	HYM00001312	CNC-HYM	Canadian National Collection of Insects, Arachnids and Nematodes
MIC 000350		MIC 000350		Canadian National Collection of Insects, Arachnids and Nematodes
HYM00000982	HYM00000982	HYM00000982	CNC-HYM	Canadian National Collection of Insects, Arachnids and Nematodes
10BBCHY-2879	L#PC2010YO-172	10BBCHY-2879	BIOUG	Biodiversity Institute of Ontario
09BBEHY-1128	L#09GM-044			Biodiversity Institute of Ontario
HYM00000944	HYM00000944	HYM00000944	CNC-HYM	Canadian National Collection of Insects, Arachnids and Nematodes
HYM00001329	HYM00001329	HYM00001329	CNC-HYM	Canadian National Collection of Insects, Arachnids and Nematodes
09PROBE-A0342	L#09PROBE-TW002-2	09PROBE-A0342	BIOUG	Biodiversity Institute of Ontario
HYM00000804	HYM00000804	HYM00000804	HYM	Canadian National Collection of Insects, Arachnids and Nematodes
07PROBE-24572	07PROBE-24572	07PROBE-24572	07PROBE	Canadian National Collection of Insects, Arachnids and Nematodes
CAM0415	CAM0415	CAM0415	CAM	Canadian National Collection of Insects, Arachnids and Nematodes
MIC 000723	MIC 000723	MIC 000723	MIC	Canadian National Collection of Insects, Arachnids and Nematodes
HYM00000793.2	HYM00000793.2	HYM00000793.2	HYM	Canadian National Collection of Insects, Arachnids and Nematodes
HYM00000812		HYM00000812	CNC-HYM	Canadian National Collection of Insects, Arachnids and Nematodes
HYM00000796	HYM00000796	HYM00000796	HYM	Canadian National Collection of Insects, Arachnids and Nematodes
HYM00000797	HYM00000797	HYM00000797	HYM	Canadian National Collection of Insects, Arachnids and Nematodes
CAM0417	CAM0417	CAM0417	CAM	Canadian National Collection of Insects, Arachnids and Nematodes
07PROBE-20789	07PROBE-20789	07PROBE-20789	07PROBE	Biodiversity Institute of Ontario
GOU 0588	GOU 0588	GOU 0588	GOU	Canadian National Collection of Insects, Arachnids and Nematodes
CAM0403	CAM0403	CAM0403	CAM	Canadian National Collection of Insects, Arachnids and Nematodes
MIC 000722	MIC 000722	MIC 000722	MIC	Canadian National Collection of Insects, Arachnids and Nematodes
CAM0419	CAM0419	CAM0419	CAM	Canadian National Collection of Insects, Arachnids and Nematodes
CAM0414	CAM0414	CAM0414	CAM	Canadian National Collection of Insects, Arachnids and Nematodes
BIOUG03882-B11	GMP#00243	BIOUG03882-B11	BIOUG	Biodiversity Institute of Ontario
HYM00000810		HYM00000810	CNC-HYM	Canadian National Collection of Insects, Arachnids and Nematodes
BIOUG07032-G03	GMP#00142	BIOUG07032-G03	BIOUG	Biodiversity Institute of Ontario
CAM0430	CAM0430	CAM0430	CAM	Canadian National Collection of Insects, Arachnids and Nematodes
HYM00000800	HYM00000800	HYM00000800	HYM	Canadian National Collection of Insects, Arachnids and Nematodes
CAM0418	CAM0418	CAM0418	CAM	Canadian National Collection of Insects, Arachnids and Nematodes
MIC 000923	MIC 000923	MIC 000923	MIC	Canadian National Collection of Insects, Arachnids and Nematodes
CAM0383	CAM0383	CAM0383	CAM	Canadian National Collection of Insects, Arachnids and Nematodes
HYM00000793		HYM00000793	CNC-HYM	Canadian National Collection of Insects, Arachnids and Nematodes
HYM00000808	HYM00000808	HYM00000808	HYM	Canadian National Collection of Insects, Arachnids and Nematodes
HYM00000962	HYM00000962	HYM00000962	CNC-HYM	Canadian National Collection of Insects, Arachnids and Nematodes
HYM00000814		HYM00000814	CNC-HYM	Canadian National Collection of Insects, Arachnids and Nematodes
CAM0953	CAM0953	CAM0953	CAM	Canadian National Collection of Insects, Arachnids and Nematodes
HYM00000604	HYM00000604	HYM00000604	CNC-HYM	Canadian National Collection of Insects, Arachnids and Nematodes
CAM0429	CAM0429	CAM0429	CAM	Canadian National Collection of Insects, Arachnids and Nematodes
CAM0382	CAM0382	CAM0382	CAM	Canadian National Collection of Insects, Arachnids and Nematodes
CAM0385	CAM0385	CAM0385	CAM	Canadian National Collection of Insects, Arachnids and Nematodes
08BBHYM-1493	L#08BANFF-006			Biodiversity Institute of Ontario
CAM0438	CAM0438	CAM0438	CAM	Canadian National Collection of Insects, Arachnids and Nematodes
CAM0423	CAM0423	CAM0423	CAM	Canadian National Collection of Insects, Arachnids and Nematodes
BIOUG03593-B08	GMP#00241	BIOUG03593-B08	BIOUG	Biodiversity Institute of Ontario
HYM00000767	HYM00000767	HYM00000767	CNC-HYM	Canadian National Collection of Insects, Arachnids and Nematodes
HYM00000817	HYM00000817	HYM00000817	HYM	Canadian National Collection of Insects, Arachnids and Nematodes
HYM00000805	HYM00000805	HYM00000805	HYM	Canadian National Collection of Insects, Arachnids and Nematodes
HYM00000809		HYM00000809	CNC-HYM	Canadian National Collection of Insects, Arachnids and Nematodes
HYM00000811		HYM00000811	CNC-HYM	Canadian National Collection of Insects, Arachnids and Nematodes
CAM0432	CAM0432	CAM0432	CAM	Canadian National Collection of Insects, Arachnids and Nematodes
HYM00000921		HYM00000921	CNC-HYM	Canadian National Collection of Insects, Arachnids and Nematodes
MIC 000909	MIC 000909	MIC 000909	MIC	Canadian National Collection of Insects, Arachnids and Nematodes
CAM0957	CAM0957	CAM0957	CAM	Canadian National Collection of Insects, Arachnids and Nematodes
CAM0955	CAM0955	CAM0955	CAM	Canadian National Collection of Insects, Arachnids and Nematodes
HYM00000799	HYM00000799	HYM00000799	HYM	Canadian National Collection of Insects, Arachnids and Nematodes
HYM00000921.2	HYM00000921.2	HYM00000921.2	HYM	Canadian National Collection of Insects, Arachnids and Nematodes
HYM00000807	HYM00000807	HYM00000807	HYM	Canadian National Collection of Insects, Arachnids and Nematodes

## Sheet: Taxonomy
Project:	SEARCH: Sample ids(633 ids), Include public records			User :	Jose Leonardo Fernandez Triana
Created :	24-September-2014
Sample ID	Phylum	Class	Order	Family	Subfamily	Tribe	Genus	Species	Subspecies	Identifier	Identifier email	Identification method	Taxonomy Notes
CAM0023	Arthropoda	Insecta	Hymenoptera	Braconidae	Microgastrinae		Apanteles	Apanteles carpatus		Jose Leonardo Fernandez Triana	jftriana@uoguelph.ca
BIOUG01088-A03	Arthropoda	Insecta	Hymenoptera	Braconidae	Microgastrinae		Apanteles	Apanteles carpatus		Angela Telfer	atelfer@uoguelph.ca
CAM0036	Arthropoda	Insecta	Hymenoptera	Braconidae	Microgastrinae		Apanteles	Apanteles carpatus		Jose Leonardo Fernandez Triana	jftriana@uoguelph.ca
MIC 000034	Arthropoda	Insecta	Hymenoptera	Braconidae	Microgastrinae		Apanteles	Apanteles carpatus		Jose Leonardo Fernandez Triana	jftriana@uoguelph.ca
MIC 000041	Arthropoda	Insecta	Hymenoptera	Braconidae	Microgastrinae		Apanteles	Apanteles carpatus		Jose Leonardo Fernandez Triana	jftriana@uoguelph.ca
MIC 000036	Arthropoda	Insecta	Hymenoptera	Braconidae	Microgastrinae		Apanteles	Apanteles carpatus		Jose Leonardo Fernandez Triana	jftriana@uoguelph.ca
BIOUG01631-B09	Arthropoda	Insecta	Hymenoptera	Braconidae	Microgastrinae		Apanteles	Apanteles carpatus		Angela Telfer	atelfer@uoguelph.ca
CAM0104	Arthropoda	Insecta	Hymenoptera	Braconidae	Microgastrinae		Apanteles	Apanteles carpatus		Jose Leonardo Fernandez Triana	jftriana@uoguelph.ca
MIC 000035	Arthropoda	Insecta	Hymenoptera	Braconidae	Microgastrinae		Apanteles	Apanteles carpatus		Jose Leonardo Fernandez Triana	jftriana@uoguelph.ca
CNCHYM 00081	Arthropoda	Insecta	Hymenoptera	Braconidae	Microgastrinae		Apanteles	Apanteles carpatus		Jose Leonardo Fernandez Triana	jftriana@uoguelph.ca
CAM0117	Arthropoda	Insecta	Hymenoptera	Braconidae	Microgastrinae		Apanteles	Apanteles carpatus		Jose Leonardo Fernandez Triana	jftriana@uoguelph.ca
CAM0021	Arthropoda	Insecta	Hymenoptera	Braconidae	Microgastrinae		Apanteles	Apanteles carpatus		Jose Leonardo Fernandez Triana	jftriana@uoguelph.ca
CAM0046	Arthropoda	Insecta	Hymenoptera	Braconidae	Microgastrinae		Apanteles	Apanteles carpatus		Jose Leonardo Fernandez Triana	jftriana@uoguelph.ca
MIC 000040	Arthropoda	Insecta	Hymenoptera	Braconidae	Microgastrinae		Apanteles	Apanteles carpatus		Jose Leonardo Fernandez Triana	jftriana@uoguelph.ca
CAM0053	Arthropoda	Insecta	Hymenoptera	Braconidae	Microgastrinae		Apanteles	Apanteles carpatus		Jose Leonardo Fernandez Triana	jftriana@uoguelph.ca
CAM0063	Arthropoda	Insecta	Hymenoptera	Braconidae	Microgastrinae		Apanteles	Apanteles carpatus		Jose Leonardo Fernandez Triana	jftriana@uoguelph.ca
CAM0020	Arthropoda	Insecta	Hymenoptera	Braconidae	Microgastrinae		Apanteles	Apanteles carpatus		Jose Leonardo Fernandez Triana	jftriana@uoguelph.ca
CAM0058	Arthropoda	Insecta	Hymenoptera	Braconidae	Microgastrinae		Apanteles	Apanteles carpatus		Jose Leonardo Fernandez Triana	jftriana@uoguelph.ca
CAM0026	Arthropoda	Insecta	Hymenoptera	Braconidae	Microgastrinae		Apanteles	Apanteles carpatus		Jose Leonardo Fernandez Triana	jftriana@uoguelph.ca
CAM0049	Arthropoda	Insecta	Hymenoptera	Braconidae	Microgastrinae		Apanteles	Apanteles carpatus		Jose Leonardo Fernandez Triana	jftriana@uoguelph.ca
MIC 000037	Arthropoda	Insecta	Hymenoptera	Braconidae	Microgastrinae		Apanteles	Apanteles carpatus		Jose Leonardo Fernandez Triana	jftriana@uoguelph.ca
MIC 000033	Arthropoda	Insecta	Hymenoptera	Braconidae	Microgastrinae		Apanteles	Apanteles carpatus		Jose Leonardo Fernandez Triana	jftriana@uoguelph.ca
MIC 000038	Arthropoda	Insecta	Hymenoptera	Braconidae	Microgastrinae		Apanteles	Apanteles carpatus		Jose Leonardo Fernandez Triana	jftriana@uoguelph.ca
CAM0042	Arthropoda	Insecta	Hymenoptera	Braconidae	Microgastrinae		Apanteles	Apanteles carpatus		Jose Leonardo Fernandez Triana	jftriana@uoguelph.ca
CNCHYM 00088	Arthropoda	Insecta	Hymenoptera	Braconidae	Microgastrinae		Apanteles	Apanteles conanchetorum		Jose Leonardo Fernandez Triana	jftriana@uoguelph.ca
MIC 000908	Arthropoda	Insecta	Hymenoptera	Braconidae	Microgastrinae		Apanteles	Apanteles conanchetorum		Jose Leonardo Fernandez Triana	jftriana@uoguelph.ca
BIOUG10353-H05	Arthropoda	Insecta	Hymenoptera	Braconidae	Microgastrinae		Apanteles	Apanteles conanchetorum					CollectionsID
MIC 000905	Arthropoda	Insecta	Hymenoptera	Braconidae	Microgastrinae		Apanteles	Apanteles conanchetorum		Jose Leonardo Fernandez Triana	jftriana@uoguelph.ca
BIOUG00989-E12	Arthropoda	Insecta	Hymenoptera	Braconidae	Microgastrinae		Apanteles	Apanteles conanchetorum		Angela Telfer	atelfer@uoguelph.ca
BIOUG01252-E11	Arthropoda	Insecta	Hymenoptera	Braconidae	Microgastrinae		Apanteles	Apanteles conanchetorum		BOLD ID Engine
BIOUG07019-B11	Arthropoda	Insecta	Hymenoptera	Braconidae	Microgastrinae		Apanteles	Apanteles conanchetorum		Angela Telfer	atelfer@uoguelph.ca
BIOUG10403-A09	Arthropoda	Insecta	Hymenoptera	Braconidae	Microgastrinae		Apanteles	Apanteles conanchetorum					CollectionsID
MIC 000063	Arthropoda	Insecta	Hymenoptera	Braconidae	Microgastrinae		Apanteles	Apanteles conanchetorum		Jose Leonardo Fernandez Triana	jftriana@uoguelph.ca
BIOUG10360-E02	Arthropoda	Insecta	Hymenoptera	Braconidae	Microgastrinae		Apanteles	Apanteles conanchetorum					CollectionsID
BIOUG10358-C12	Arthropoda	Insecta	Hymenoptera	Braconidae	Microgastrinae		Apanteles	Apanteles conanchetorum					CollectionsID
BIOUG00989-F01	Arthropoda	Insecta	Hymenoptera	Braconidae	Microgastrinae		Apanteles	Apanteles conanchetorum		Angela Telfer	atelfer@uoguelph.ca
BIOUG11905-C04	Arthropoda	Insecta	Hymenoptera	Braconidae	Microgastrinae		Apanteles	Apanteles conanchetorum		Angela Telfer	atelfer@uoguelph.ca
MIC 000902	Arthropoda	Insecta	Hymenoptera	Braconidae	Microgastrinae		Apanteles	Apanteles conanchetorum		Jose Leonardo Fernandez Triana	jftriana@uoguelph.ca
MIC 000058	Arthropoda	Insecta	Hymenoptera	Braconidae	Microgastrinae		Apanteles	Apanteles conanchetorum		Jose Leonardo Fernandez Triana	jftriana@uoguelph.ca
CAM0096	Arthropoda	Insecta	Hymenoptera	Braconidae	Microgastrinae		Apanteles	Apanteles conanchetorum		Jose Leonardo Fernandez Triana	jftriana@uoguelph.ca
BIOUG11907-E10	Arthropoda	Insecta	Hymenoptera	Braconidae	Microgastrinae		Apanteles	Apanteles conanchetorum		Angela Telfer	atelfer@uoguelph.ca
CAM1013	Arthropoda	Insecta	Hymenoptera	Braconidae	Microgastrinae		Apanteles	Apanteles conanchetorum		Jose Leonardo Fernandez Triana	jftriana@uoguelph.ca
BIOUG01631-H02	Arthropoda	Insecta	Hymenoptera	Braconidae	Microgastrinae		Apanteles	Apanteles conanchetorum		BOLD ID Engine
CNCHYM 00089	Arthropoda	Insecta	Hymenoptera	Braconidae	Microgastrinae		Apanteles	Apanteles conanchetorum		Jose Leonardo Fernandez Triana	jftriana@uoguelph.ca
BIOUG04245-B10	Arthropoda	Insecta	Hymenoptera	Braconidae	Microgastrinae		Apanteles	Apanteles conanchetorum					CollectionsID
BIOUG00989-E09	Arthropoda	Insecta	Hymenoptera	Braconidae	Microgastrinae		Apanteles	Apanteles conanchetorum		Angela Telfer	atelfer@uoguelph.ca
BIOUG11904-F02	Arthropoda	Insecta	Hymenoptera	Braconidae	Microgastrinae		Apanteles	Apanteles conanchetorum		Angela Telfer	atelfer@uoguelph.ca
10BBCHY-2243	Arthropoda	Insecta	Hymenoptera	Braconidae	Microgastrinae		Apanteles	Apanteles conanchetorum		Jose Leonardo Fernandez Triana	jftriana@uoguelph.ca
MIC 000600	Arthropoda	Insecta	Hymenoptera	Braconidae	Microgastrinae		Apanteles	Apanteles conanchetorum		Jose Leonardo Fernandez Triana	jftriana@uoguelph.ca
PCPP10-0759	Arthropoda	Insecta	Hymenoptera	Braconidae	Microgastrinae		Apanteles	Apanteles conanchetorum		Jose Leonardo Fernandez Triana	jftriana@uoguelph.ca
BIOUG11909-G05	Arthropoda	Insecta	Hymenoptera	Braconidae	Microgastrinae		Apanteles	Apanteles conanchetorum		Angela Telfer	atelfer@uoguelph.ca
BIOUG00991-A05	Arthropoda	Insecta	Hymenoptera	Braconidae	Microgastrinae		Apanteles	Apanteles conanchetorum		Angela Telfer	atelfer@uoguelph.ca
BIOUG00914-E04	Arthropoda	Insecta	Hymenoptera	Braconidae	Microgastrinae		Apanteles	Apanteles conanchetorum		Angela Telfer	atelfer@uoguelph.ca
BIOUG00914-E03	Arthropoda	Insecta	Hymenoptera	Braconidae	Microgastrinae		Apanteles	Apanteles conanchetorum		Angela Telfer	atelfer@uoguelph.ca
BIOUG10961-E03	Arthropoda	Insecta	Hymenoptera	Braconidae	Microgastrinae		Apanteles	Apanteles conanchetorum					CollectionsID
BIOUG08661-F09	Arthropoda	Insecta	Hymenoptera	Braconidae	Microgastrinae		Apanteles	Apanteles conanchetorum					CollectionsID
BIOUG07067-E03	Arthropoda	Insecta	Hymenoptera	Braconidae	Microgastrinae		Apanteles	Apanteles conanchetorum					CollectionsID
BIOUG01280-G04	Arthropoda	Insecta	Hymenoptera	Braconidae	Microgastrinae		Apanteles	Apanteles conanchetorum		BOLD ID Engine
CAM0160	Arthropoda	Insecta	Hymenoptera	Braconidae	Microgastrinae		Apanteles	Apanteles conanchetorum		Jose Leonardo Fernandez Triana	jftriana@uoguelph.ca
BIOUG06873-E09	Arthropoda	Insecta	Hymenoptera	Braconidae	Microgastrinae		Apanteles	Apanteles conanchetorum					CollectionsID
BIOUG12293-G01	Arthropoda	Insecta	Hymenoptera	Braconidae	Microgastrinae		Apanteles	Apanteles conanchetorum		Angela Telfer	atelfer@uoguelph.ca
BIOUG10408-B06	Arthropoda	Insecta	Hymenoptera	Braconidae	Microgastrinae		Apanteles	Apanteles conanchetorum					CollectionsID
BIOUG00989-E11	Arthropoda	Insecta	Hymenoptera	Braconidae	Microgastrinae		Apanteles	Apanteles conanchetorum		Angela Telfer	atelfer@uoguelph.ca
BIOUG10358-E06	Arthropoda	Insecta	Hymenoptera	Braconidae	Microgastrinae		Apanteles	Apanteles conanchetorum					CollectionsID
BIOUG00861-G06	Arthropoda	Insecta	Hymenoptera	Braconidae	Microgastrinae		Apanteles	Apanteles conanchetorum		BOLD ID Engine
BIOUG10550-D04	Arthropoda	Insecta	Hymenoptera	Braconidae	Microgastrinae		Apanteles	Apanteles conanchetorum					CollectionsID
BIOUG02507-D09	Arthropoda	Insecta	Hymenoptera	Braconidae	Microgastrinae		Apanteles	Apanteles conanchetorum		BOLD ID Engine
BIOUG10403-A08	Arthropoda	Insecta	Hymenoptera	Braconidae	Microgastrinae		Apanteles	Apanteles conanchetorum					CollectionsID
BIOUG00914-E07	Arthropoda	Insecta	Hymenoptera	Braconidae	Microgastrinae		Apanteles	Apanteles conanchetorum		Angela Telfer	atelfer@uoguelph.ca
CAM0147	Arthropoda	Insecta	Hymenoptera	Braconidae	Microgastrinae		Apanteles	Apanteles conanchetorum		Jose Leonardo Fernandez Triana	jftriana@uoguelph.ca
BIOUG00988-A09	Arthropoda	Insecta	Hymenoptera	Braconidae	Microgastrinae		Apanteles	Apanteles conanchetorum		Angela Telfer	atelfer@uoguelph.ca
BIOUG11910-C01	Arthropoda	Insecta	Hymenoptera	Braconidae	Microgastrinae		Apanteles	Apanteles conanchetorum		Angela Telfer	atelfer@uoguelph.ca
BIOUG04245-A01	Arthropoda	Insecta	Hymenoptera	Braconidae	Microgastrinae		Apanteles	Apanteles conanchetorum					CollectionsID
BIOUG00914-F08	Arthropoda	Insecta	Hymenoptera	Braconidae	Microgastrinae		Apanteles	Apanteles conanchetorum		Angela Telfer	atelfer@uoguelph.ca
BIOUG10661-F02	Arthropoda	Insecta	Hymenoptera	Braconidae	Microgastrinae		Apanteles	Apanteles conanchetorum					CollectionsID
BIOUG11910-B12	Arthropoda	Insecta	Hymenoptera	Braconidae	Microgastrinae		Apanteles	Apanteles conanchetorum		Angela Telfer	atelfer@uoguelph.ca
CNCHYM 00093	Arthropoda	Insecta	Hymenoptera	Braconidae	Microgastrinae		Apanteles	Apanteles conanchetorum		Jose Leonardo Fernandez Triana	jftriana@uoguelph.ca
CAM0005	Arthropoda	Insecta	Hymenoptera	Braconidae	Microgastrinae		Apanteles	Apanteles conanchetorum		Jose Leonardo Fernandez Triana	jftriana@uoguelph.ca
CAM0085	Arthropoda	Insecta	Hymenoptera	Braconidae	Microgastrinae		Apanteles	Apanteles conanchetorum		Jose Leonardo Fernandez Triana	jftriana@uoguelph.ca
BIOUG00989-A08	Arthropoda	Insecta	Hymenoptera	Braconidae	Microgastrinae		Apanteles	Apanteles conanchetorum		Angela Telfer	atelfer@uoguelph.ca
BIOUG08192-F10	Arthropoda	Insecta	Hymenoptera	Braconidae	Microgastrinae		Apanteles	Apanteles conanchetorum					CollectionsID
BIOUG01330-D09	Arthropoda	Insecta	Hymenoptera	Braconidae	Microgastrinae		Apanteles	Apanteles conanchetorum
BIOUG10353-G01	Arthropoda	Insecta	Hymenoptera	Braconidae	Microgastrinae		Apanteles	Apanteles conanchetorum					CollectionsID
BIOUG00914-G01	Arthropoda	Insecta	Hymenoptera	Braconidae	Microgastrinae		Apanteles	Apanteles conanchetorum		Angela Telfer	atelfer@uoguelph.ca
BIOUG07067-C07	Arthropoda	Insecta	Hymenoptera	Braconidae	Microgastrinae		Apanteles	Apanteles conanchetorum					CollectionsID
BIOUG12037-E03	Arthropoda	Insecta	Hymenoptera	Braconidae	Microgastrinae		Apanteles	Apanteles conanchetorum		Angela Telfer	atelfer@uoguelph.ca
MIC 000061	Arthropoda	Insecta	Hymenoptera	Braconidae	Microgastrinae		Apanteles	Apanteles conanchetorum		Jose Leonardo Fernandez Triana	jftriana@uoguelph.ca
BIOUG00989-E10	Arthropoda	Insecta	Hymenoptera	Braconidae	Microgastrinae		Apanteles	Apanteles conanchetorum		Angela Telfer	atelfer@uoguelph.ca
BIOUG10405-G04	Arthropoda	Insecta	Hymenoptera	Braconidae	Microgastrinae		Apanteles	Apanteles conanchetorum					CollectionsID
MIC 000060	Arthropoda	Insecta	Hymenoptera	Braconidae	Microgastrinae		Apanteles	Apanteles conanchetorum		Jose Leonardo Fernandez Triana	jftriana@uoguelph.ca
CAM0159	Arthropoda	Insecta	Hymenoptera	Braconidae	Microgastrinae		Apanteles	Apanteles conanchetorum		Jose Leonardo Fernandez Triana	jftriana@uoguelph.ca
BIOUG13530-A05	Arthropoda	Insecta	Hymenoptera	Braconidae	Microgastrinae		Apanteles	Apanteles conanchetorum		Angela Telfer	atelfer@uoguelph.ca
BIOUG00914-F06	Arthropoda	Insecta	Hymenoptera	Braconidae	Microgastrinae		Apanteles	Apanteles conanchetorum		Angela Telfer	atelfer@uoguelph.ca
CNCHYM 03970	Arthropoda	Insecta	Hymenoptera	Braconidae	Microgastrinae		Apanteles	Apanteles conanchetorum		Jose Leonardo Fernandez Triana	jftriana@uoguelph.ca
BIOUG04245-C02	Arthropoda	Insecta	Hymenoptera	Braconidae	Microgastrinae		Apanteles	Apanteles conanchetorum					CollectionsID
BIOUG00989-G12	Arthropoda	Insecta	Hymenoptera	Braconidae	Microgastrinae		Apanteles	Apanteles conanchetorum		Angela Telfer	atelfer@uoguelph.ca
BIOUG01309-D01	Arthropoda	Insecta	Hymenoptera	Braconidae	Microgastrinae		Apanteles	Apanteles conanchetorum		BOLD ID Engine
BIOUG00914-E08	Arthropoda	Insecta	Hymenoptera	Braconidae	Microgastrinae		Apanteles	Apanteles conanchetorum		Angela Telfer	atelfer@uoguelph.ca
BIOUG11908-H02	Arthropoda	Insecta	Hymenoptera	Braconidae	Microgastrinae		Apanteles	Apanteles conanchetorum		Angela Telfer	atelfer@uoguelph.ca
BIOUG11903-A01	Arthropoda	Insecta	Hymenoptera	Braconidae	Microgastrinae		Apanteles	Apanteles conanchetorum		Angela Telfer	atelfer@uoguelph.ca
BIOUG12293-B06	Arthropoda	Insecta	Hymenoptera	Braconidae	Microgastrinae		Apanteles	Apanteles conanchetorum		Angela Telfer	atelfer@uoguelph.ca
BIOUG10405-C03	Arthropoda	Insecta	Hymenoptera	Braconidae	Microgastrinae		Apanteles	Apanteles conanchetorum					CollectionsID
BIOUG06873-G07	Arthropoda	Insecta	Hymenoptera	Braconidae	Microgastrinae		Apanteles	Apanteles conanchetorum					CollectionsID
MIC 000059	Arthropoda	Insecta	Hymenoptera	Braconidae	Microgastrinae		Apanteles	Apanteles conanchetorum		Jose Leonardo Fernandez Triana	jftriana@uoguelph.ca
CNCHYM 00090	Arthropoda	Insecta	Hymenoptera	Braconidae	Microgastrinae		Apanteles	Apanteles conanchetorum		Jose Leonardo Fernandez Triana	jftriana@uoguelph.ca
MIC 000064	Arthropoda	Insecta	Hymenoptera	Braconidae	Microgastrinae		Apanteles	Apanteles conanchetorum		Jose Leonardo Fernandez Triana	jftriana@uoguelph.ca
BIOUG11904-C07	Arthropoda	Insecta	Hymenoptera	Braconidae	Microgastrinae		Apanteles	Apanteles conanchetorum		Angela Telfer	atelfer@uoguelph.ca
BIOUG00991-B06	Arthropoda	Insecta	Hymenoptera	Braconidae	Microgastrinae		Apanteles	Apanteles conanchetorum		Angela Telfer	atelfer@uoguelph.ca
BIOUG09238-D12	Arthropoda	Insecta	Hymenoptera	Braconidae	Microgastrinae		Apanteles	Apanteles conanchetorum					CollectionsID
BIOUG12038-B01	Arthropoda	Insecta	Hymenoptera	Braconidae	Microgastrinae		Apanteles	Apanteles conanchetorum		Angela Telfer	atelfer@uoguelph.ca
BIOUG00989-A07	Arthropoda	Insecta	Hymenoptera	Braconidae	Microgastrinae		Apanteles	Apanteles conanchetorum		Angela Telfer	atelfer@uoguelph.ca
BIOUG10479-G03	Arthropoda	Insecta	Hymenoptera	Braconidae	Microgastrinae		Apanteles	Apanteles conanchetorum					CollectionsID
BIOUG11908-G11	Arthropoda	Insecta	Hymenoptera	Braconidae	Microgastrinae		Apanteles	Apanteles conanchetorum		Angela Telfer	atelfer@uoguelph.ca
BIOUG03486-E11	Arthropoda	Insecta	Hymenoptera	Braconidae	Microgastrinae		Apanteles	Apanteles conanchetorum					CollectionsID
WMIC 0240	Arthropoda	Insecta	Hymenoptera	Braconidae	Microgastrinae		Apanteles	Apanteles conanchetorum		Jose Leonardo Fernandez Triana	jftriana@uoguelph.ca
BIOUG04245-B04	Arthropoda	Insecta	Hymenoptera	Braconidae	Microgastrinae		Apanteles	Apanteles conanchetorum					CollectionsID
MIC 000062	Arthropoda	Insecta	Hymenoptera	Braconidae	Microgastrinae		Apanteles	Apanteles conanchetorum		Jose Leonardo Fernandez Triana	jftriana@uoguelph.ca
BIOUG11907-B04	Arthropoda	Insecta	Hymenoptera	Braconidae	Microgastrinae		Apanteles	Apanteles conanchetorum		Angela Telfer	atelfer@uoguelph.ca
BIOUG01327-H05	Arthropoda	Insecta	Hymenoptera	Braconidae	Microgastrinae		Apanteles	Apanteles conanchetorum
BIOUG11625-E04	Arthropoda	Insecta	Hymenoptera	Braconidae	Microgastrinae		Apanteles	Apanteles ensiger					CollectionsID
BIOUG01657-E06	Arthropoda	Insecta	Hymenoptera	Braconidae	Microgastrinae		Apanteles	Apanteles ensiger
07PROBE-22328	Arthropoda	Insecta	Hymenoptera	Braconidae	Microgastrinae		Apanteles	Apanteles ensiger		Jose Leonardo Fernandez Triana	jftriana@uoguelph.ca
BIOUG11759-F05	Arthropoda	Insecta	Hymenoptera	Braconidae	Microgastrinae		Apanteles	Apanteles ensiger					CollectionsID
CAM0960	Arthropoda	Insecta	Hymenoptera	Braconidae	Microgastrinae		Apanteles	Apanteles ensiger		Jose Leonardo Fernandez Triana	jftriana@uoguelph.ca
BIOUG14172-C09	Arthropoda	Insecta	Hymenoptera	Braconidae	Microgastrinae		Apanteles	Apanteles ensiger		Angela Telfer	atelfer@uoguelph.ca
BIOUG01631-D07	Arthropoda	Insecta	Hymenoptera	Braconidae	Microgastrinae		Apanteles	Apanteles ensiger		BOLD ID Engine
BIOUG08683-C10	Arthropoda	Insecta	Hymenoptera	Braconidae	Microgastrinae		Apanteles	Apanteles ensiger					CollectionsID
BIOUG14172-G04	Arthropoda	Insecta	Hymenoptera	Braconidae	Microgastrinae		Apanteles	Apanteles ensiger		Angela Telfer	atelfer@uoguelph.ca
CAM0009	Arthropoda	Insecta	Hymenoptera	Braconidae	Microgastrinae		Apanteles	Apanteles ensiger		Jose Leonardo Fernandez Triana	jftriana@uoguelph.ca
BIOUG08669-D07	Arthropoda	Insecta	Hymenoptera	Braconidae	Microgastrinae		Apanteles	Apanteles ensiger					CollectionsID
CAM0940	Arthropoda	Insecta	Hymenoptera	Braconidae	Microgastrinae		Apanteles	Apanteles ensiger		Jose Leonardo Fernandez Triana	jftriana@uoguelph.ca
MIC 000087	Arthropoda	Insecta	Hymenoptera	Braconidae	Microgastrinae		Apanteles	Apanteles ensiger		Jose Leonardo Fernandez Triana	jftriana@uoguelph.ca
BIOUG08641-D09	Arthropoda	Insecta	Hymenoptera	Braconidae	Microgastrinae		Apanteles	Apanteles ensiger					CollectionsID
BIOUG08683-G07	Arthropoda	Insecta	Hymenoptera	Braconidae	Microgastrinae		Apanteles	Apanteles ensiger					CollectionsID
BIOUG08663-H08	Arthropoda	Insecta	Hymenoptera	Braconidae	Microgastrinae		Apanteles	Apanteles ensiger					CollectionsID
BIOUG09765-A01	Arthropoda	Insecta	Hymenoptera	Braconidae	Microgastrinae		Apanteles	Apanteles ensiger					CollectionsID
BIOUG08683-C04	Arthropoda	Insecta	Hymenoptera	Braconidae	Microgastrinae		Apanteles	Apanteles ensiger					CollectionsID
BIOUG14108-F04	Arthropoda	Insecta	Hymenoptera	Braconidae	Microgastrinae		Apanteles	Apanteles ensiger		Angela Telfer	atelfer@uoguelph.ca
BIOUG08647-G04	Arthropoda	Insecta	Hymenoptera	Braconidae	Microgastrinae		Apanteles	Apanteles ensiger					CollectionsID
BIOUG09932-C07	Arthropoda	Insecta	Hymenoptera	Braconidae	Microgastrinae		Apanteles	Apanteles ensiger					CollectionsID
HYM00001023	Arthropoda	Insecta	Hymenoptera	Braconidae	Microgastrinae		Apanteles	Apanteles ensiger		Jose Leonardo Fernandez Triana	jftriana@uoguelph.ca
BIOUG10202-A04	Arthropoda	Insecta	Hymenoptera	Braconidae	Microgastrinae		Apanteles	Apanteles ensiger					CollectionsID
CAM0342	Arthropoda	Insecta	Hymenoptera	Braconidae	Microgastrinae		Apanteles	Apanteles ensiger		Jose Leonardo Fernandez Triana	jftriana@uoguelph.ca
MIC 000903	Arthropoda	Insecta	Hymenoptera	Braconidae	Microgastrinae		Apanteles	Apanteles ensiger		Jose Leonardo Fernandez Triana	jftriana@uoguelph.ca
BIOUG11707-A06	Arthropoda	Insecta	Hymenoptera	Braconidae	Microgastrinae		Apanteles	Apanteles ensiger					CollectionsID
HYM00001022	Arthropoda	Insecta	Hymenoptera	Braconidae	Microgastrinae		Apanteles	Apanteles ensiger		Jose Leonardo Fernandez Triana	jftriana@uoguelph.ca
BIOUG06823-D09	Arthropoda	Insecta	Hymenoptera	Braconidae	Microgastrinae		Apanteles	Apanteles ensiger					CollectionsID
BIOUG08647-C01	Arthropoda	Insecta	Hymenoptera	Braconidae	Microgastrinae		Apanteles	Apanteles ensiger					CollectionsID
MIC 000910	Arthropoda	Insecta	Hymenoptera	Braconidae	Microgastrinae		Apanteles	Apanteles ensiger		Jose Leonardo Fernandez Triana	jftriana@uoguelph.ca
CAM0526	Arthropoda	Insecta	Hymenoptera	Braconidae	Microgastrinae		Apanteles	Apanteles ensiger		Jose Leonardo Fernandez Triana	jftriana@uoguelph.ca
CAM0962	Arthropoda	Insecta	Hymenoptera	Braconidae	Microgastrinae		Apanteles	Apanteles ensiger		Jose Leonardo Fernandez Triana	jftriana@uoguelph.ca
MIC 000493	Arthropoda	Insecta	Hymenoptera	Braconidae	Microgastrinae		Apanteles	Apanteles ensiger		Jose Leonardo Fernandez Triana	jftriana@uoguelph.ca
BIOUG06549-D07	Arthropoda	Insecta	Hymenoptera	Braconidae	Microgastrinae		Apanteles	Apanteles ensiger					CollectionsID
BIOUG03220-A01	Arthropoda	Insecta	Hymenoptera	Braconidae	Microgastrinae		Apanteles	Apanteles ensiger
CAM0290	Arthropoda	Insecta	Hymenoptera	Braconidae	Microgastrinae		Apanteles	Apanteles ensiger		Jose Leonardo Fernandez Triana	jftriana@uoguelph.ca
MIC 000637	Arthropoda	Insecta	Hymenoptera	Braconidae	Microgastrinae		Apanteles	Apanteles ensiger		Jose Leonardo Fernandez Triana	jftriana@uoguelph.ca
CAM0011	Arthropoda	Insecta	Hymenoptera	Braconidae	Microgastrinae		Apanteles	Apanteles ensiger		Jose Leonardo Fernandez Triana	jftriana@uoguelph.ca
HYM00001027	Arthropoda	Insecta	Hymenoptera	Braconidae	Microgastrinae		Apanteles	Apanteles ensiger		Jose Leonardo Fernandez Triana	jftriana@uoguelph.ca
BIOUG06823-E10	Arthropoda	Insecta	Hymenoptera	Braconidae	Microgastrinae		Apanteles	Apanteles ensiger					CollectionsID
CAM0939	Arthropoda	Insecta	Hymenoptera	Braconidae	Microgastrinae		Apanteles	Apanteles ensiger		Jose Leonardo Fernandez Triana	jftriana@uoguelph.ca
BIOUG11771-G06	Arthropoda	Insecta	Hymenoptera	Braconidae	Microgastrinae		Apanteles	Apanteles ensiger					CollectionsID
BIOUG08748-E07	Arthropoda	Insecta	Hymenoptera	Braconidae	Microgastrinae		Apanteles	Apanteles ensiger					CollectionsID
CAM0352	Arthropoda	Insecta	Hymenoptera	Braconidae	Microgastrinae		Apanteles	Apanteles ensiger		Jose Leonardo Fernandez Triana	jftriana@uoguelph.ca
CAM0448	Arthropoda	Insecta	Hymenoptera	Braconidae	Microgastrinae		Apanteles	Apanteles ensiger		Jose Leonardo Fernandez Triana	jftriana@uoguelph.ca
BIOUG09807-F11	Arthropoda	Insecta	Hymenoptera	Braconidae	Microgastrinae		Apanteles	Apanteles ensiger					CollectionsID
BIOUG06471-C10	Arthropoda	Insecta	Hymenoptera	Braconidae	Microgastrinae		Apanteles	Apanteles ensiger					CollectionsID
CNCH3194	Arthropoda	Insecta	Hymenoptera	Braconidae	Microgastrinae		Apanteles	Apanteles ensiger		Jose Leonardo Fernandez Triana	jftriana@uoguelph.ca
BIOUG03220-F05	Arthropoda	Insecta	Hymenoptera	Braconidae	Microgastrinae		Apanteles	Apanteles ensiger
CAM0289	Arthropoda	Insecta	Hymenoptera	Braconidae	Microgastrinae		Apanteles	Apanteles ensiger		Jose Leonardo Fernandez Triana	jftriana@uoguelph.ca
BIOUG01657-F10	Arthropoda	Insecta	Hymenoptera	Braconidae	Microgastrinae		Apanteles	Apanteles ensiger
CAM0344	Arthropoda	Insecta	Hymenoptera	Braconidae	Microgastrinae		Apanteles	Apanteles ensiger		Jose Leonardo Fernandez Triana	jftriana@uoguelph.ca
HYM00001003	Arthropoda	Insecta	Hymenoptera	Braconidae	Microgastrinae		Apanteles	Apanteles ensiger		Jose Leonardo Fernandez Triana	jftriana@uoguelph.ca
CAM0525	Arthropoda	Insecta	Hymenoptera	Braconidae	Microgastrinae		Apanteles	Apanteles ensiger		Jose Leonardo Fernandez Triana	jftriana@uoguelph.ca
BIOUG08643-F01	Arthropoda	Insecta	Hymenoptera	Braconidae	Microgastrinae		Apanteles	Apanteles ensiger					CollectionsID
MIC 000090	Arthropoda	Insecta	Hymenoptera	Braconidae	Microgastrinae		Apanteles	Apanteles ensiger		Jose Leonardo Fernandez Triana	jftriana@uoguelph.ca
BIOUG00761-A09	Arthropoda	Insecta	Hymenoptera	Braconidae	Microgastrinae		Apanteles	Apanteles ensiger		Jose Leonardo Fernandez Triana	jftriana@uoguelph.ca
HYM00000665.2	Arthropoda	Insecta	Hymenoptera	Braconidae	Microgastrinae		Apanteles	Apanteles ensiger		Jose Leonardo Fernandez Triana	jftriana@uoguelph.ca
BIOUG09925-E09	Arthropoda	Insecta	Hymenoptera	Braconidae	Microgastrinae		Apanteles	Apanteles ensiger					CollectionsID
MIC 000084	Arthropoda	Insecta	Hymenoptera	Braconidae	Microgastrinae		Apanteles	Apanteles ensiger		Jose Leonardo Fernandez Triana	jftriana@uoguelph.ca
BIOUG01572-H03	Arthropoda	Insecta	Hymenoptera	Braconidae	Microgastrinae		Apanteles	Apanteles ensiger
CAM0114	Arthropoda	Insecta	Hymenoptera	Braconidae	Microgastrinae		Apanteles	Apanteles ensiger		Jose Leonardo Fernandez Triana	jftriana@uoguelph.ca
BIOUG14107-D02	Arthropoda	Insecta	Hymenoptera	Braconidae	Microgastrinae		Apanteles	Apanteles ensiger		Angela Telfer	atelfer@uoguelph.ca
CAM0345	Arthropoda	Insecta	Hymenoptera	Braconidae	Microgastrinae		Apanteles	Apanteles ensiger		Jose Leonardo Fernandez Triana	jftriana@uoguelph.ca
CAM0963	Arthropoda	Insecta	Hymenoptera	Braconidae	Microgastrinae		Apanteles	Apanteles ensiger		Jose Leonardo Fernandez Triana	jftriana@uoguelph.ca
CAM0288	Arthropoda	Insecta	Hymenoptera	Braconidae	Microgastrinae		Apanteles	Apanteles ensiger		Jose Leonardo Fernandez Triana	jftriana@uoguelph.ca
CAM0341	Arthropoda	Insecta	Hymenoptera	Braconidae	Microgastrinae		Apanteles	Apanteles ensiger		Jose Leonardo Fernandez Triana	jftriana@uoguelph.ca
CAM0106	Arthropoda	Insecta	Hymenoptera	Braconidae	Microgastrinae		Apanteles	Apanteles ensiger		Jose Leonardo Fernandez Triana	jftriana@uoguelph.ca
BIOUG06823-E06	Arthropoda	Insecta	Hymenoptera	Braconidae	Microgastrinae		Apanteles	Apanteles ensiger					CollectionsID
HYM00001019	Arthropoda	Insecta	Hymenoptera	Braconidae	Microgastrinae		Apanteles	Apanteles ensiger		Jose Leonardo Fernandez Triana	jftriana@uoguelph.ca
CAM0154	Arthropoda	Insecta	Hymenoptera	Braconidae	Microgastrinae		Apanteles	Apanteles ensiger		Jose Leonardo Fernandez Triana	jftriana@uoguelph.ca
CAM0340	Arthropoda	Insecta	Hymenoptera	Braconidae	Microgastrinae		Apanteles	Apanteles ensiger		Jose Leonardo Fernandez Triana	jftriana@uoguelph.ca
HYM00001028	Arthropoda	Insecta	Hymenoptera	Braconidae	Microgastrinae		Apanteles	Apanteles ensiger		Jose Leonardo Fernandez Triana	jftriana@uoguelph.ca
HYM00001024	Arthropoda	Insecta	Hymenoptera	Braconidae	Microgastrinae		Apanteles	Apanteles ensiger		Jose Leonardo Fernandez Triana	jftriana@uoguelph.ca
CAM0161	Arthropoda	Insecta	Hymenoptera	Braconidae	Microgastrinae		Apanteles	Apanteles ensiger		Jose Leonardo Fernandez Triana	jftriana@uoguelph.ca
BIOUG12486-D10	Arthropoda	Insecta	Hymenoptera	Braconidae	Microgastrinae		Apanteles	Apanteles ensiger		Angela Telfer	atelfer@uoguelph.ca
PCPP10-0466	Arthropoda	Insecta	Hymenoptera	Braconidae	Microgastrinae		Apanteles	Apanteles ensiger		Julie K. Stahlhut	julie.stahlhut@icloud.com
BIOUG12736-B05	Arthropoda	Insecta	Hymenoptera	Braconidae	Microgastrinae		Apanteles	Apanteles ensiger		Angela Telfer	atelfer@uoguelph.ca
10BBHYM-1225	Arthropoda	Insecta	Hymenoptera	Braconidae	Microgastrinae		Apanteles	Apanteles ensiger		Jose Leonardo Fernandez Triana	jftriana@uoguelph.ca
HYM00001004	Arthropoda	Insecta	Hymenoptera	Braconidae	Microgastrinae		Apanteles	Apanteles ensiger		Jose Leonardo Fernandez Triana	jftriana@uoguelph.ca
CAM0008	Arthropoda	Insecta	Hymenoptera	Braconidae	Microgastrinae		Apanteles	Apanteles ensiger		Jose Leonardo Fernandez Triana	jftriana@uoguelph.ca
BIOUG08799-G08	Arthropoda	Insecta	Hymenoptera	Braconidae	Microgastrinae		Apanteles	Apanteles ensiger					CollectionsID
CAM0521	Arthropoda	Insecta	Hymenoptera	Braconidae	Microgastrinae		Apanteles	Apanteles ensiger		Jose Leonardo Fernandez Triana	jftriana@uoguelph.ca
BIOUG04041-A02	Arthropoda	Insecta	Hymenoptera	Braconidae	Microgastrinae		Apanteles	Apanteles ensiger					CollectionsID
BIOUG03979-A07	Arthropoda	Insecta	Hymenoptera	Braconidae	Microgastrinae		Apanteles	Apanteles ensiger					CollectionsID
BIOUG03979-B04	Arthropoda	Insecta	Hymenoptera	Braconidae	Microgastrinae		Apanteles	Apanteles ensiger					CollectionsID
BIOUG00991-B03	Arthropoda	Insecta	Hymenoptera	Braconidae	Microgastrinae		Apanteles	Apanteles ensiger		Jose Leonardo Fernandez Triana	jftriana@uoguelph.ca	Specimen examination	Specimen photo clearly matches species Apanteles ensiger
CAM0166	Arthropoda	Insecta	Hymenoptera	Braconidae	Microgastrinae		Apanteles	Apanteles ensiger		Jose Leonardo Fernandez Triana	jftriana@uoguelph.ca
CAM0103	Arthropoda	Insecta	Hymenoptera	Braconidae	Microgastrinae		Apanteles	Apanteles ensiger		Jose Leonardo Fernandez Triana	jftriana@uoguelph.ca
BIOUG07898-C04	Arthropoda	Insecta	Hymenoptera	Braconidae	Microgastrinae		Apanteles	Apanteles ensiger					CollectionsID
BIOUG09931-A07	Arthropoda	Insecta	Hymenoptera	Braconidae	Microgastrinae		Apanteles	Apanteles ensiger					CollectionsID
BIOUG12977-D11	Arthropoda	Insecta	Hymenoptera	Braconidae	Microgastrinae		Apanteles	Apanteles ensiger		Angela Telfer	atelfer@uoguelph.ca
BIOUG08641-G07	Arthropoda	Insecta	Hymenoptera	Braconidae	Microgastrinae		Apanteles	Apanteles ensiger					CollectionsID
CNCHYM 00107	Arthropoda	Insecta	Hymenoptera	Braconidae	Microgastrinae		Apanteles	Apanteles ensiger		Jose Leonardo Fernandez Triana	jftriana@uoguelph.ca
CAM0938	Arthropoda	Insecta	Hymenoptera	Braconidae	Microgastrinae		Apanteles	Apanteles ensiger		Jose Leonardo Fernandez Triana	jftriana@uoguelph.ca
CAM0348	Arthropoda	Insecta	Hymenoptera	Braconidae	Microgastrinae		Apanteles	Apanteles ensiger		Jose Leonardo Fernandez Triana	jftriana@uoguelph.ca
BIOUG08647-G07	Arthropoda	Insecta	Hymenoptera	Braconidae	Microgastrinae		Apanteles	Apanteles ensiger					CollectionsID
BIOUG03979-B03	Arthropoda	Insecta	Hymenoptera	Braconidae	Microgastrinae		Apanteles	Apanteles ensiger					CollectionsID
CAM0346	Arthropoda	Insecta	Hymenoptera	Braconidae	Microgastrinae		Apanteles	Apanteles ensiger		Jose Leonardo Fernandez Triana	jftriana@uoguelph.ca
BIOUG01795-D07	Arthropoda	Insecta	Hymenoptera	Braconidae	Microgastrinae		Apanteles	Apanteles ensiger		BOLD ID Engine
BIOUG11996-F03	Arthropoda	Insecta	Hymenoptera	Braconidae	Microgastrinae		Apanteles	Apanteles ensiger					CollectionsID
BIOUG11597-E04	Arthropoda	Insecta	Hymenoptera	Braconidae	Microgastrinae		Apanteles	Apanteles ensiger					CollectionsID
CAM0445	Arthropoda	Insecta	Hymenoptera	Braconidae	Microgastrinae		Apanteles	Apanteles ensiger		Jose Leonardo Fernandez Triana	jftriana@uoguelph.ca
BIOUG07903-F12	Arthropoda	Insecta	Hymenoptera	Braconidae	Microgastrinae		Apanteles	Apanteles ensiger					CollectionsID
CAM0527	Arthropoda	Insecta	Hymenoptera	Braconidae	Microgastrinae		Apanteles	Apanteles ensiger		Jose Leonardo Fernandez Triana	jftriana@uoguelph.ca
BIOUG01657-C11	Arthropoda	Insecta	Hymenoptera	Braconidae	Microgastrinae		Apanteles	Apanteles ensiger
09BBEHY-2030	Arthropoda	Insecta	Hymenoptera	Braconidae	Microgastrinae		Apanteles	Apanteles ensiger		Jose Leonardo Fernandez Triana	jftriana@uoguelph.ca
BIOUG09770-A04	Arthropoda	Insecta	Hymenoptera	Braconidae	Microgastrinae		Apanteles	Apanteles ensiger					CollectionsID
CAM0531	Arthropoda	Insecta	Hymenoptera	Braconidae	Microgastrinae		Apanteles	Apanteles ensiger		Jose Leonardo Fernandez Triana	jftriana@uoguelph.ca
CAM0007	Arthropoda	Insecta	Hymenoptera	Braconidae	Microgastrinae		Apanteles	Apanteles ensiger		Jose Leonardo Fernandez Triana	jftriana@uoguelph.ca
BIOUG12487-D03	Arthropoda	Insecta	Hymenoptera	Braconidae	Microgastrinae		Apanteles	Apanteles ensiger		Angela Telfer	atelfer@uoguelph.ca
MIC 000086	Arthropoda	Insecta	Hymenoptera	Braconidae	Microgastrinae		Apanteles	Apanteles ensiger		Jose Leonardo Fernandez Triana	jftriana@uoguelph.ca
ASGLE-0880	Arthropoda	Insecta	Hymenoptera	Braconidae	Microgastrinae		Apanteles	Apanteles ensiger		Jose Leonardo Fernandez Triana	jftriana@uoguelph.ca	Specimen examination	Specimen photo clearly matches the identity of Apanteles ensiger
BIOUG03887-F12	Arthropoda	Insecta	Hymenoptera	Braconidae	Microgastrinae		Apanteles	Apanteles ensiger					CollectionsID
BIOUG08665-D12	Arthropoda	Insecta	Hymenoptera	Braconidae	Microgastrinae		Apanteles	Apanteles ensiger					CollectionsID
BIOUG09515-E11	Arthropoda	Insecta	Hymenoptera	Braconidae	Microgastrinae		Apanteles	Apanteles ensiger					CollectionsID
CAM0022	Arthropoda	Insecta	Hymenoptera	Braconidae	Microgastrinae		Apanteles	Apanteles ensiger		Jose Leonardo Fernandez Triana	jftriana@uoguelph.ca
CAM0446	Arthropoda	Insecta	Hymenoptera	Braconidae	Microgastrinae		Apanteles	Apanteles ensiger		Jose Leonardo Fernandez Triana	jftriana@uoguelph.ca
BIOUG01631-A09	Arthropoda	Insecta	Hymenoptera	Braconidae	Microgastrinae		Apanteles	Apanteles ensiger		BOLD ID Engine
CAM0635	Arthropoda	Insecta	Hymenoptera	Braconidae	Microgastrinae		Apanteles	Apanteles ensiger		Jose Leonardo Fernandez Triana	jftriana@uoguelph.ca
CAM0335	Arthropoda	Insecta	Hymenoptera	Braconidae	Microgastrinae		Apanteles	Apanteles ensiger		Jose Leonardo Fernandez Triana	jftriana@uoguelph.ca
GOU 0570	Arthropoda	Insecta	Hymenoptera	Braconidae	Microgastrinae		Apanteles	Apanteles ensiger		Jose Leonardo Fernandez Triana	jftriana@uoguelph.ca
BIOUG07902-D08	Arthropoda	Insecta	Hymenoptera	Braconidae	Microgastrinae		Apanteles	Apanteles ensiger					CollectionsID
HYM00001026	Arthropoda	Insecta	Hymenoptera	Braconidae	Microgastrinae		Apanteles	Apanteles ensiger		Jose Leonardo Fernandez Triana	jftriana@uoguelph.ca
CAM0523	Arthropoda	Insecta	Hymenoptera	Braconidae	Microgastrinae		Apanteles	Apanteles ensiger		Jose Leonardo Fernandez Triana	jftriana@uoguelph.ca
CAM0356	Arthropoda	Insecta	Hymenoptera	Braconidae	Microgastrinae		Apanteles	Apanteles ensiger		Jose Leonardo Fernandez Triana	jftriana@uoguelph.ca
CNCH1358	Arthropoda	Insecta	Hymenoptera	Braconidae	Microgastrinae		Apanteles	Apanteles ensiger		Jose Leonardo Fernandez Triana	jftriana@uoguelph.ca
MIC 000083	Arthropoda	Insecta	Hymenoptera	Braconidae	Microgastrinae		Apanteles	Apanteles ensiger		Jose Leonardo Fernandez Triana	jftriana@uoguelph.ca
BIOUG12977-D01	Arthropoda	Insecta	Hymenoptera	Braconidae	Microgastrinae		Apanteles	Apanteles ensiger		Angela Telfer	atelfer@uoguelph.ca
BIOUG11331-F04	Arthropoda	Insecta	Hymenoptera	Braconidae	Microgastrinae		Apanteles	Apanteles ensiger		Angela Telfer	atelfer@uoguelph.ca
BIOUG03863-G08	Arthropoda	Insecta	Hymenoptera	Braconidae	Microgastrinae		Apanteles	Apanteles ensiger					CollectionsID
BIOUG09765-B03	Arthropoda	Insecta	Hymenoptera	Braconidae	Microgastrinae		Apanteles	Apanteles ensiger					CollectionsID
CAM0410	Arthropoda	Insecta	Hymenoptera	Braconidae	Microgastrinae		Apanteles	Apanteles ensiger		Jose Leonardo Fernandez Triana	jftriana@uoguelph.ca
CAM0113	Arthropoda	Insecta	Hymenoptera	Braconidae	Microgastrinae		Apanteles	Apanteles ensiger		Jose Leonardo Fernandez Triana	jftriana@uoguelph.ca
WMIC 0517	Arthropoda	Insecta	Hymenoptera	Braconidae	Microgastrinae		Apanteles	Apanteles ensiger		Jose Leonardo Fernandez Triana	jftriana@uoguelph.ca
BIOUG11999-F03	Arthropoda	Insecta	Hymenoptera	Braconidae	Microgastrinae		Apanteles	Apanteles ensiger					CollectionsID
BIOUG00726-B07	Arthropoda	Insecta	Hymenoptera	Braconidae	Microgastrinae		Apanteles	Apanteles ensiger		Jose Leonardo Fernandez Triana	jftriana@uoguelph.ca
CAM0151	Arthropoda	Insecta	Hymenoptera	Braconidae	Microgastrinae		Apanteles	Apanteles ensiger		Jose Leonardo Fernandez Triana	jftriana@uoguelph.ca
CAM0524	Arthropoda	Insecta	Hymenoptera	Braconidae	Microgastrinae		Apanteles	Apanteles ensiger		Jose Leonardo Fernandez Triana	jftriana@uoguelph.ca
BIOUG03123-B05	Arthropoda	Insecta	Hymenoptera	Braconidae	Microgastrinae		Apanteles	Apanteles ensiger					CollectionsID
CAM0013	Arthropoda	Insecta	Hymenoptera	Braconidae	Microgastrinae		Apanteles	Apanteles ensiger		Jose Leonardo Fernandez Triana	jftriana@uoguelph.ca
MIC 000082	Arthropoda	Insecta	Hymenoptera	Braconidae	Microgastrinae		Apanteles	Apanteles ensiger		Jose Leonardo Fernandez Triana	jftriana@uoguelph.ca
BIOUG14171-B01	Arthropoda	Insecta	Hymenoptera	Braconidae	Microgastrinae		Apanteles	Apanteles ensiger		Angela Telfer	atelfer@uoguelph.ca
CAM0942	Arthropoda	Insecta	Hymenoptera	Braconidae	Microgastrinae		Apanteles	Apanteles ensiger		Jose Leonardo Fernandez Triana	jftriana@uoguelph.ca
BIOUG09803-F06	Arthropoda	Insecta	Hymenoptera	Braconidae	Microgastrinae		Apanteles	Apanteles ensiger					CollectionsID
BIOUG07004-C04	Arthropoda	Insecta	Hymenoptera	Braconidae	Microgastrinae		Apanteles	Apanteles ensiger					CollectionsID
CAM0529	Arthropoda	Insecta	Hymenoptera	Braconidae	Microgastrinae		Apanteles	Apanteles ensiger		Jose Leonardo Fernandez Triana	jftriana@uoguelph.ca
CAM0074	Arthropoda	Insecta	Hymenoptera	Braconidae	Microgastrinae		Apanteles	Apanteles ensiger		Jose Leonardo Fernandez Triana	jftriana@uoguelph.ca
BIOUG06823-E08	Arthropoda	Insecta	Hymenoptera	Braconidae	Microgastrinae		Apanteles	Apanteles ensiger					CollectionsID
BIOUG08665-A11	Arthropoda	Insecta	Hymenoptera	Braconidae	Microgastrinae		Apanteles	Apanteles ensiger					CollectionsID
BIOUG01631-G11	Arthropoda	Insecta	Hymenoptera	Braconidae	Microgastrinae		Apanteles	Apanteles ensiger		BOLD ID Engine
BIOUG12974-A03	Arthropoda	Insecta	Hymenoptera	Braconidae	Microgastrinae		Apanteles	Apanteles ensiger		Angela Telfer	atelfer@uoguelph.ca
CAM0447	Arthropoda	Insecta	Hymenoptera	Braconidae	Microgastrinae		Apanteles	Apanteles ensiger		Jose Leonardo Fernandez Triana	jftriana@uoguelph.ca
BIOUG01597-F04	Arthropoda	Insecta	Hymenoptera	Braconidae	Microgastrinae		Apanteles	Apanteles ensiger		BOLD ID Engine
BIOUG08647-D01	Arthropoda	Insecta	Hymenoptera	Braconidae	Microgastrinae		Apanteles	Apanteles ensiger					CollectionsID
BIOUG01657-F02	Arthropoda	Insecta	Hymenoptera	Braconidae	Microgastrinae		Apanteles	Apanteles ensiger
BIOUG09765-A12	Arthropoda	Insecta	Hymenoptera	Braconidae	Microgastrinae		Apanteles	Apanteles ensiger					CollectionsID
BIOUG03979-H08	Arthropoda	Insecta	Hymenoptera	Braconidae	Microgastrinae		Apanteles	Apanteles ensiger					CollectionsID
CAM0350	Arthropoda	Insecta	Hymenoptera	Braconidae	Microgastrinae		Apanteles	Apanteles ensiger		Jose Leonardo Fernandez Triana	jftriana@uoguelph.ca
BIOUG03931-F01	Arthropoda	Insecta	Hymenoptera	Braconidae	Microgastrinae		Apanteles	Apanteles ensiger
BIOUG09930-G10	Arthropoda	Insecta	Hymenoptera	Braconidae	Microgastrinae		Apanteles	Apanteles ensiger					CollectionsID
BIOUG08648-H10	Arthropoda	Insecta	Hymenoptera	Braconidae	Microgastrinae		Apanteles	Apanteles ensiger					CollectionsID
BIOUG08752-A08	Arthropoda	Insecta	Hymenoptera	Braconidae	Microgastrinae		Apanteles	Apanteles ensiger					CollectionsID
BIOUG12497-F12	Arthropoda	Insecta	Hymenoptera	Braconidae	Microgastrinae		Apanteles	Apanteles ensiger		Angela Telfer	atelfer@uoguelph.ca
BIOUG08665-F02	Arthropoda	Insecta	Hymenoptera	Braconidae	Microgastrinae		Apanteles	Apanteles ensiger					CollectionsID
BIOUG09930-E06	Arthropoda	Insecta	Hymenoptera	Braconidae	Microgastrinae		Apanteles	Apanteles ensiger					CollectionsID
CAM0120	Arthropoda	Insecta	Hymenoptera	Braconidae	Microgastrinae		Apanteles	Apanteles ensiger		Jose Leonardo Fernandez Triana	jftriana@uoguelph.ca
BIOUG01661-E11	Arthropoda	Insecta	Hymenoptera	Braconidae	Microgastrinae		Apanteles	Apanteles ensiger
BIOUG09765-A06	Arthropoda	Insecta	Hymenoptera	Braconidae	Microgastrinae		Apanteles	Apanteles ensiger					CollectionsID
CAM0389	Arthropoda	Insecta	Hymenoptera	Braconidae	Microgastrinae		Apanteles	Apanteles ensiger		Jose Leonardo Fernandez Triana	jftriana@uoguelph.ca
HYM00001020	Arthropoda	Insecta	Hymenoptera	Braconidae	Microgastrinae		Apanteles	Apanteles ensiger		Jose Leonardo Fernandez Triana	jftriana@uoguelph.ca
CAM0286	Arthropoda	Insecta	Hymenoptera	Braconidae	Microgastrinae		Apanteles	Apanteles ensiger		Jose Leonardo Fernandez Triana	jftriana@uoguelph.ca
CAM0163	Arthropoda	Insecta	Hymenoptera	Braconidae	Microgastrinae		Apanteles	Apanteles ensiger		Jose Leonardo Fernandez Triana	jftriana@uoguelph.ca
CAM0351	Arthropoda	Insecta	Hymenoptera	Braconidae	Microgastrinae		Apanteles	Apanteles ensiger		Jose Leonardo Fernandez Triana	jftriana@uoguelph.ca
TDWG-0384	Arthropoda	Insecta	Hymenoptera	Braconidae	Microgastrinae		Apanteles	Apanteles ensiger
CAM0413	Arthropoda	Insecta	Hymenoptera	Braconidae	Microgastrinae		Apanteles	Apanteles ensiger		Jose Leonardo Fernandez Triana	jftriana@uoguelph.ca
BIOUG06823-D07	Arthropoda	Insecta	Hymenoptera	Braconidae	Microgastrinae		Apanteles	Apanteles ensiger					CollectionsID
CNCHYM 00106	Arthropoda	Insecta	Hymenoptera	Braconidae	Microgastrinae		Apanteles	Apanteles ensiger		Jose Leonardo Fernandez Triana	jftriana@uoguelph.ca
BIOUG08499-C11	Arthropoda	Insecta	Hymenoptera	Braconidae	Microgastrinae		Apanteles	Apanteles ensiger					CollectionsID
CAM0360	Arthropoda	Insecta	Hymenoptera	Braconidae	Microgastrinae		Apanteles	Apanteles ensiger		Jose Leonardo Fernandez Triana	jftriana@uoguelph.ca
CAM0349	Arthropoda	Insecta	Hymenoptera	Braconidae	Microgastrinae		Apanteles	Apanteles ensiger		Jose Leonardo Fernandez Triana	jftriana@uoguelph.ca
CAM0115	Arthropoda	Insecta	Hymenoptera	Braconidae	Microgastrinae		Apanteles	Apanteles ensiger		Jose Leonardo Fernandez Triana	jftriana@uoguelph.ca
MIC 000085	Arthropoda	Insecta	Hymenoptera	Braconidae	Microgastrinae		Apanteles	Apanteles ensiger		Jose Leonardo Fernandez Triana	jftriana@uoguelph.ca
BIOUG03979-G06	Arthropoda	Insecta	Hymenoptera	Braconidae	Microgastrinae		Apanteles	Apanteles ensiger					CollectionsID
CAM0964	Arthropoda	Insecta	Hymenoptera	Braconidae	Microgastrinae		Apanteles	Apanteles ensiger		Jose Leonardo Fernandez Triana	jftriana@uoguelph.ca
CAM0025	Arthropoda	Insecta	Hymenoptera	Braconidae	Microgastrinae		Apanteles	Apanteles ensiger		Jose Leonardo Fernandez Triana	jftriana@uoguelph.ca
MIC 000088	Arthropoda	Insecta	Hymenoptera	Braconidae	Microgastrinae		Apanteles	Apanteles ensiger		Jose Leonardo Fernandez Triana	jftriana@uoguelph.ca
BIOUG08807-A09	Arthropoda	Insecta	Hymenoptera	Braconidae	Microgastrinae		Apanteles	Apanteles ensiger					CollectionsID
CAM0101	Arthropoda	Insecta	Hymenoptera	Braconidae	Microgastrinae		Apanteles	Apanteles ensiger		Jose Leonardo Fernandez Triana	jftriana@uoguelph.ca
BIOUG09925-F01	Arthropoda	Insecta	Hymenoptera	Braconidae	Microgastrinae		Apanteles	Apanteles ensiger					CollectionsID
BIOUG09345-D07	Arthropoda	Insecta	Hymenoptera	Braconidae	Microgastrinae		Apanteles	Apanteles ensiger					CollectionsID
BIOUG09925-A01	Arthropoda	Insecta	Hymenoptera	Braconidae	Microgastrinae		Apanteles	Apanteles ensiger					CollectionsID
BIOUG14261-G11	Arthropoda	Insecta	Hymenoptera	Braconidae	Microgastrinae		Apanteles	Apanteles ensiger		Angela Telfer	atelfer@uoguelph.ca
CAM0062	Arthropoda	Insecta	Hymenoptera	Braconidae	Microgastrinae		Apanteles	Apanteles ensiger		Jose Leonardo Fernandez Triana	jftriana@uoguelph.ca
BIOUG08665-D10	Arthropoda	Insecta	Hymenoptera	Braconidae	Microgastrinae		Apanteles	Apanteles ensiger					CollectionsID
CAM0076	Arthropoda	Insecta	Hymenoptera	Braconidae	Microgastrinae		Apanteles	Apanteles ensiger		Jose Leonardo Fernandez Triana	jftriana@uoguelph.ca
BIOUG11771-G09	Arthropoda	Insecta	Hymenoptera	Braconidae	Microgastrinae		Apanteles	Apanteles ensiger					CollectionsID
BIOUG09807-D05	Arthropoda	Insecta	Hymenoptera	Braconidae	Microgastrinae		Apanteles	Apanteles ensiger					CollectionsID
CAM0530	Arthropoda	Insecta	Hymenoptera	Braconidae	Microgastrinae		Apanteles	Apanteles ensiger		Jose Leonardo Fernandez Triana	jftriana@uoguelph.ca
HYM00001021	Arthropoda	Insecta	Hymenoptera	Braconidae	Microgastrinae		Apanteles	Apanteles ensiger		Jose Leonardo Fernandez Triana	jftriana@uoguelph.ca
CAM0528	Arthropoda	Insecta	Hymenoptera	Braconidae	Microgastrinae		Apanteles	Apanteles ensiger		Jose Leonardo Fernandez Triana	jftriana@uoguelph.ca
10BBCHY-1304	Arthropoda	Insecta	Hymenoptera	Braconidae	Microgastrinae		Apanteles	Apanteles ensiger		Julie K. Stahlhut	julie.stahlhut@icloud.com		CollectionsID
CNCH1025	Arthropoda	Insecta	Hymenoptera	Braconidae	Microgastrinae		Apanteles	Apanteles ensiger		Jose Leonardo Fernandez Triana	jftriana@uoguelph.ca
CAM0399	Arthropoda	Insecta	Hymenoptera	Braconidae	Microgastrinae		Apanteles	Apanteles ensiger		Jose Leonardo Fernandez Triana	jftriana@uoguelph.ca
BIOUG07902-D06	Arthropoda	Insecta	Hymenoptera	Braconidae	Microgastrinae		Apanteles	Apanteles ensiger					CollectionsID
MIC 000089	Arthropoda	Insecta	Hymenoptera	Braconidae	Microgastrinae		Apanteles	Apanteles ensiger		Jose Leonardo Fernandez Triana	jftriana@uoguelph.ca
BIOUG01631-A05	Arthropoda	Insecta	Hymenoptera	Braconidae	Microgastrinae		Apanteles	Apanteles ensiger		BOLD ID Engine
CAM0941	Arthropoda	Insecta	Hymenoptera	Braconidae	Microgastrinae		Apanteles	Apanteles ensiger		Jose Leonardo Fernandez Triana	jftriana@uoguelph.ca
CAM0961	Arthropoda	Insecta	Hymenoptera	Braconidae	Microgastrinae		Apanteles	Apanteles ensiger		Jose Leonardo Fernandez Triana	jftriana@uoguelph.ca
BIOUG10641-G12	Arthropoda	Insecta	Hymenoptera	Braconidae	Microgastrinae		Apanteles	Apanteles ensiger					CollectionsID
BIOUG09631-C02	Arthropoda	Insecta	Hymenoptera	Braconidae	Microgastrinae		Apanteles	Apanteles ensiger					CollectionsID
BIOUG14099-G10	Arthropoda	Insecta	Hymenoptera	Braconidae	Microgastrinae		Apanteles	Apanteles ensiger		Angela Telfer	atelfer@uoguelph.ca
BIOUG11758-F08	Arthropoda	Insecta	Hymenoptera	Braconidae	Microgastrinae		Apanteles	Apanteles ensiger					CollectionsID
10BBCHY-1305	Arthropoda	Insecta	Hymenoptera	Braconidae	Microgastrinae		Apanteles	Apanteles ensiger		Julie K. Stahlhut	julie.stahlhut@icloud.com		CollectionsID
CAM0522	Arthropoda	Insecta	Hymenoptera	Braconidae	Microgastrinae		Apanteles	Apanteles ensiger		Jose Leonardo Fernandez Triana	jftriana@uoguelph.ca
CAM0347	Arthropoda	Insecta	Hymenoptera	Braconidae	Microgastrinae		Apanteles	Apanteles ensiger		Jose Leonardo Fernandez Triana	jftriana@uoguelph.ca
CNCHYM 00105	Arthropoda	Insecta	Hymenoptera	Braconidae	Microgastrinae		Apanteles	Apanteles ensiger		Jose Leonardo Fernandez Triana	jftriana@uoguelph.ca
BIOUG14170-E05	Arthropoda	Insecta	Hymenoptera	Braconidae	Microgastrinae		Apanteles	Apanteles ensiger		Angela Telfer	atelfer@uoguelph.ca
CAM0054	Arthropoda	Insecta	Hymenoptera	Braconidae	Microgastrinae		Apanteles	Apanteles ensiger		Jose Leonardo Fernandez Triana	jftriana@uoguelph.ca
HYM00000665	Arthropoda	Insecta	Hymenoptera	Braconidae	Microgastrinae		Apanteles	Apanteles ensiger		Jose Leonardo Fernandez Triana	jftriana@uoguelph.ca
BIOUG08749-G01	Arthropoda	Insecta	Hymenoptera	Braconidae	Microgastrinae		Apanteles	Apanteles ensiger					CollectionsID
TDWG-0167	Arthropoda	Insecta	Hymenoptera	Braconidae	Microgastrinae		Apanteles	Apanteles ensiger
07PROBE-23393	Arthropoda	Insecta	Hymenoptera	Braconidae	Microgastrinae		Apanteles	Apanteles ensiger		Jose Leonardo Fernandez Triana	jftriana@uoguelph.ca
BIOUG07902-D03	Arthropoda	Insecta	Hymenoptera	Braconidae	Microgastrinae		Apanteles	Apanteles ensiger					CollectionsID
CAM0099	Arthropoda	Insecta	Hymenoptera	Braconidae	Microgastrinae		Apanteles	Apanteles ensiger		Jose Leonardo Fernandez Triana	jftriana@uoguelph.ca
BIOUG08565-E09	Arthropoda	Insecta	Hymenoptera	Braconidae	Microgastrinae		Apanteles	Apanteles ensiger					CollectionsID
MIC 000666	Arthropoda	Insecta	Hymenoptera	Braconidae	Microgastrinae		Apanteles	Apanteles ensiger		Jose Leonardo Fernandez Triana	jftriana@uoguelph.ca
CAM0146	Arthropoda	Insecta	Hymenoptera	Braconidae	Microgastrinae		Apanteles	Apanteles ensiger		Jose Leonardo Fernandez Triana	jftriana@uoguelph.ca
BIOUG09801-C03	Arthropoda	Insecta	Hymenoptera	Braconidae	Microgastrinae		Apanteles	Apanteles ensiger					CollectionsID
MIC 000488	Arthropoda	Insecta	Hymenoptera	Braconidae	Microgastrinae		Apanteles	Apanteles ensiger		Jose Leonardo Fernandez Triana	jftriana@uoguelph.ca
BIOUG01572-D01	Arthropoda	Insecta	Hymenoptera	Braconidae	Microgastrinae		Apanteles	Apanteles ensiger
HYM00001025	Arthropoda	Insecta	Hymenoptera	Braconidae	Microgastrinae		Apanteles	Apanteles ensiger		Jose Leonardo Fernandez Triana	jftriana@uoguelph.ca
CAM0072	Arthropoda	Insecta	Hymenoptera	Braconidae	Microgastrinae		Apanteles	Apanteles ensiger		Jose Leonardo Fernandez Triana	jftriana@uoguelph.ca
CAM0024	Arthropoda	Insecta	Hymenoptera	Braconidae	Microgastrinae		Apanteles	Apanteles ensiger		Jose Leonardo Fernandez Triana	jftriana@uoguelph.ca
BIOUG11726-F01	Arthropoda	Insecta	Hymenoptera	Braconidae	Microgastrinae		Apanteles	Apanteles ensiger					CollectionsID
BIOUG12460-D06	Arthropoda	Insecta	Hymenoptera	Braconidae	Microgastrinae		Apanteles	Apanteles ensiger		Angela Telfer	atelfer@uoguelph.ca
BIOUG09930-G04	Arthropoda	Insecta	Hymenoptera	Braconidae	Microgastrinae		Apanteles	Apanteles ensiger					CollectionsID
BIOUG03863-E06	Arthropoda	Insecta	Hymenoptera	Braconidae	Microgastrinae		Apanteles	Apanteles ensiger					CollectionsID
CAM0039	Arthropoda	Insecta	Hymenoptera	Braconidae	Microgastrinae		Apanteles	Apanteles ensiger		Jose Leonardo Fernandez Triana	jftriana@uoguelph.ca
CAM0409	Arthropoda	Insecta	Hymenoptera	Braconidae	Microgastrinae		Apanteles	Apanteles ensiger		Jose Leonardo Fernandez Triana	jftriana@uoguelph.ca
CBRA0492	Arthropoda	Insecta	Hymenoptera	Braconidae	Microgastrinae		Apanteles	Apanteles sodalis		Jose Leonardo Fernandez Triana	jftriana@uoguelph.ca
CBRA0493	Arthropoda	Insecta	Hymenoptera	Braconidae	Microgastrinae		Apanteles	Apanteles sodalis		Jose Leonardo Fernandez Triana	jftriana@uoguelph.ca		Specimens under this species name in the CNC may represent more than one species. They need to be studied before concluding.
CNCHYM 00215	Arthropoda	Insecta	Hymenoptera	Braconidae	Microgastrinae		Apanteles	Apanteles sodalis		Jose Leonardo Fernandez Triana	jftriana@uoguelph.ca
CBRA0491	Arthropoda	Insecta	Hymenoptera	Braconidae	Microgastrinae		Apanteles	Apanteles sodalis		Jose Leonardo Fernandez Triana	jftriana@uoguelph.ca
MIC 000009	Arthropoda	Insecta	Hymenoptera	Braconidae	Microgastrinae		Apanteles	Apanteles sodalis		Jose Leonardo Fernandez Triana	jftriana@uoguelph.ca
CBRA0490	Arthropoda	Insecta	Hymenoptera	Braconidae	Microgastrinae		Apanteles	Apanteles sodalis		Jose Leonardo Fernandez Triana	jftriana@uoguelph.ca
MIC 000007	Arthropoda	Insecta	Hymenoptera	Braconidae	Microgastrinae		Apanteles	Apanteles sodalis		Jose Leonardo Fernandez Triana	jftriana@uoguelph.ca
MIC 000013	Arthropoda	Insecta	Hymenoptera	Braconidae	Microgastrinae		Apanteles	Apanteles sodalis		Jose Leonardo Fernandez Triana	jftriana@uoguelph.ca
MIC 000010	Arthropoda	Insecta	Hymenoptera	Braconidae	Microgastrinae		Apanteles	Apanteles sodalis		Jose Leonardo Fernandez Triana	jftriana@uoguelph.ca
MIC 000011	Arthropoda	Insecta	Hymenoptera	Braconidae	Microgastrinae		Apanteles	Apanteles sodalis		Jose Leonardo Fernandez Triana	jftriana@uoguelph.ca
MIC 000014	Arthropoda	Insecta	Hymenoptera	Braconidae	Microgastrinae		Apanteles	Apanteles sodalis		Jose Leonardo Fernandez Triana	jftriana@uoguelph.ca
MIC 000005	Arthropoda	Insecta	Hymenoptera	Braconidae	Microgastrinae		Apanteles	Apanteles sodalis		Jose Leonardo Fernandez Triana	jftriana@uoguelph.ca
CBRA0495	Arthropoda	Insecta	Hymenoptera	Braconidae	Microgastrinae		Apanteles	Apanteles sodalis		Jose Leonardo Fernandez Triana	jftriana@uoguelph.ca		Specimens under this species name in the CNC may represent more than one species. They need to be studied before concluding.
CBRA0494	Arthropoda	Insecta	Hymenoptera	Braconidae	Microgastrinae		Apanteles	Apanteles sodalis		Jose Leonardo Fernandez Triana	jftriana@uoguelph.ca		Specimens under this species name in the CNC may represent more than one species. They need to be studied before concluding.
MIC 000012	Arthropoda	Insecta	Hymenoptera	Braconidae	Microgastrinae		Apanteles	Apanteles sodalis		Jose Leonardo Fernandez Triana	jftriana@uoguelph.ca
MIC 000006	Arthropoda	Insecta	Hymenoptera	Braconidae	Microgastrinae		Apanteles	Apanteles sodalis		Jose Leonardo Fernandez Triana	jftriana@uoguelph.ca
MIC 000008	Arthropoda	Insecta	Hymenoptera	Braconidae	Microgastrinae		Apanteles	Apanteles sodalis		Jose Leonardo Fernandez Triana	jftriana@uoguelph.ca
BIOUG10637-H02	Arthropoda	Insecta	Hymenoptera	Braconidae	Microgastrinae		Apanteles	Apanteles xanthostigma					CollectionsID
07PROBE-22321	Arthropoda	Insecta	Hymenoptera	Braconidae	Microgastrinae		Apanteles	Apanteles xanthostigma		Jose Leonardo Fernandez Triana	jftriana@uoguelph.ca
BIOUG04486-G10	Arthropoda	Insecta	Hymenoptera	Braconidae	Microgastrinae		Apanteles	Apanteles xanthostigma		Jose Leonardo Fernandez Triana	jftriana@uoguelph.ca
MIC 000638	Arthropoda	Insecta	Hymenoptera	Braconidae	Microgastrinae		Apanteles	Apanteles xanthostigma		Jose Leonardo Fernandez Triana	jftriana@uoguelph.ca
07PROBE-20921	Arthropoda	Insecta	Hymenoptera	Braconidae	Microgastrinae		Apanteles	Apanteles xanthostigma		Jose Leonardo Fernandez Triana	jftriana@uoguelph.ca
CNCHYM 00401	Arthropoda	Insecta	Hymenoptera	Braconidae	Microgastrinae		Cotesia	Cotesia crambi		Jose Leonardo Fernandez Triana	jftriana@uoguelph.ca
BIOUG08665-E05	Arthropoda	Insecta	Hymenoptera	Braconidae	Microgastrinae		Cotesia	Cotesia crambi		Angela Telfer	atelfer@uoguelph.ca		CollectionsID
BIOUG01258-H06	Arthropoda	Insecta	Hymenoptera	Braconidae	Microgastrinae		Cotesia	Cotesia crambi		Angela Telfer	atelfer@uoguelph.ca
CAM0542	Arthropoda	Insecta	Hymenoptera	Braconidae	Microgastrinae		Cotesia	Cotesia crambi		Jose Leonardo Fernandez Triana	jftriana@uoguelph.ca
BIOUG08742-H10	Arthropoda	Insecta	Hymenoptera	Braconidae	Microgastrinae		Cotesia	Cotesia crambi		Angela Telfer	atelfer@uoguelph.ca		CollectionsID
CNCHYM 00404	Arthropoda	Insecta	Hymenoptera	Braconidae	Microgastrinae		Cotesia	Cotesia crambi		Jose Leonardo Fernandez Triana	jftriana@uoguelph.ca
CNCHYM 00403	Arthropoda	Insecta	Hymenoptera	Braconidae	Microgastrinae		Cotesia	Cotesia crambi		Jose Leonardo Fernandez Triana	jftriana@uoguelph.ca
CNCHYM 00402	Arthropoda	Insecta	Hymenoptera	Braconidae	Microgastrinae		Cotesia	Cotesia crambi		Jose Leonardo Fernandez Triana	jftriana@uoguelph.ca
CAM1034	Arthropoda	Insecta	Hymenoptera	Braconidae	Microgastrinae		Cotesia	Cotesia crambi		Jose Leonardo Fernandez Triana	jftriana@uoguelph.ca
BIOUG03438-B06	Arthropoda	Insecta	Hymenoptera	Braconidae	Microgastrinae		Cotesia	Cotesia crambi		Angela Telfer	atelfer@uoguelph.ca
CAM0893	Arthropoda	Insecta	Hymenoptera	Braconidae	Microgastrinae		Cotesia	Cotesia crambi		Jose Leonardo Fernandez Triana	jftriana@uoguelph.ca
BIOUG03445-F01	Arthropoda	Insecta	Hymenoptera	Braconidae	Microgastrinae		Cotesia	Cotesia crambi		Angela Telfer	atelfer@uoguelph.ca
CNCHYM 01091	Arthropoda	Insecta	Hymenoptera	Braconidae	Microgastrinae		Dolichogenidea	Dolichogenidea longicauda		Jose Leonardo Fernandez Triana	jftriana@uoguelph.ca
CNCHYM 01093	Arthropoda	Insecta	Hymenoptera	Braconidae	Microgastrinae		Dolichogenidea	Dolichogenidea longicauda		Jose Leonardo Fernandez Triana	jftriana@uoguelph.ca
CNCHYM 01089	Arthropoda	Insecta	Hymenoptera	Braconidae	Microgastrinae		Dolichogenidea	Dolichogenidea longicauda		Jose Leonardo Fernandez Triana	jftriana@uoguelph.ca
CNCHYM 00216	Arthropoda	Insecta	Hymenoptera	Braconidae	Microgastrinae		Dolichogenidea	Dolichogenidea longicauda		Jose Leonardo Fernandez Triana	jftriana@uoguelph.ca
CNCHYM 01363	Arthropoda	Insecta	Hymenoptera	Braconidae	Microgastrinae		Hygroplitis	Hygroplitis melligaster		Jose Leonardo Fernandez Triana	jftriana@uoguelph.ca
CNCHYM 01366	Arthropoda	Insecta	Hymenoptera	Braconidae	Microgastrinae		Hygroplitis	Hygroplitis melligaster		Jose Leonardo Fernandez Triana	jftriana@uoguelph.ca
CNCHYM 01375	Arthropoda	Insecta	Hymenoptera	Braconidae	Microgastrinae		Hygroplitis	Hygroplitis melligaster		Jose Leonardo Fernandez Triana	jftriana@uoguelph.ca
GOU 0314	Arthropoda	Insecta	Hymenoptera	Braconidae	Microgastrinae		Hygroplitis	Hygroplitis melligaster		Jose Leonardo Fernandez Triana	jftriana@uoguelph.ca
CNCHYM 01365	Arthropoda	Insecta	Hymenoptera	Braconidae	Microgastrinae		Hygroplitis	Hygroplitis melligaster		Jose Leonardo Fernandez Triana	jftriana@uoguelph.ca
CAM0473	Arthropoda	Insecta	Hymenoptera	Braconidae	Microgastrinae		Hygroplitis	Hygroplitis melligaster		Jose Leonardo Fernandez Triana	jftriana@uoguelph.ca
CNCHYM 01369	Arthropoda	Insecta	Hymenoptera	Braconidae	Microgastrinae		Hygroplitis	Hygroplitis melligaster		Jose Leonardo Fernandez Triana	jftriana@uoguelph.ca
CAM0470	Arthropoda	Insecta	Hymenoptera	Braconidae	Microgastrinae		Hygroplitis	Hygroplitis melligaster		Jose Leonardo Fernandez Triana	jftriana@uoguelph.ca
CAM0471	Arthropoda	Insecta	Hymenoptera	Braconidae	Microgastrinae		Hygroplitis	Hygroplitis melligaster		Jose Leonardo Fernandez Triana	jftriana@uoguelph.ca
CAM0468	Arthropoda	Insecta	Hymenoptera	Braconidae	Microgastrinae		Hygroplitis	Hygroplitis melligaster		Jose Leonardo Fernandez Triana	jftriana@uoguelph.ca
CNCHYM 01370	Arthropoda	Insecta	Hymenoptera	Braconidae	Microgastrinae		Hygroplitis	Hygroplitis melligaster		Jose Leonardo Fernandez Triana	jftriana@uoguelph.ca
CAM0463	Arthropoda	Insecta	Hymenoptera	Braconidae	Microgastrinae		Hygroplitis	Hygroplitis melligaster		Jose Leonardo Fernandez Triana	jftriana@uoguelph.ca
CAM0465	Arthropoda	Insecta	Hymenoptera	Braconidae	Microgastrinae		Hygroplitis	Hygroplitis melligaster		Jose Leonardo Fernandez Triana	jftriana@uoguelph.ca
CAM0464	Arthropoda	Insecta	Hymenoptera	Braconidae	Microgastrinae		Hygroplitis	Hygroplitis melligaster		Jose Leonardo Fernandez Triana	jftriana@uoguelph.ca
CNCHYM 01368	Arthropoda	Insecta	Hymenoptera	Braconidae	Microgastrinae		Hygroplitis	Hygroplitis melligaster		Jose Leonardo Fernandez Triana	jftriana@uoguelph.ca
CNCHYM 01367	Arthropoda	Insecta	Hymenoptera	Braconidae	Microgastrinae		Hygroplitis	Hygroplitis melligaster		Jose Leonardo Fernandez Triana	jftriana@uoguelph.ca
CAM0462	Arthropoda	Insecta	Hymenoptera	Braconidae	Microgastrinae		Hygroplitis	Hygroplitis melligaster		Jose Leonardo Fernandez Triana	jftriana@uoguelph.ca
CNCHYM 01371	Arthropoda	Insecta	Hymenoptera	Braconidae	Microgastrinae		Hygroplitis	Hygroplitis melligaster		Jose Leonardo Fernandez Triana	jftriana@uoguelph.ca
CAM0469	Arthropoda	Insecta	Hymenoptera	Braconidae	Microgastrinae		Hygroplitis	Hygroplitis melligaster		Jose Leonardo Fernandez Triana	jftriana@uoguelph.ca
CNCHYM 01376	Arthropoda	Insecta	Hymenoptera	Braconidae	Microgastrinae		Hygroplitis	Hygroplitis melligaster		Jose Leonardo Fernandez Triana	jftriana@uoguelph.ca
CNCHYM 01364	Arthropoda	Insecta	Hymenoptera	Braconidae	Microgastrinae		Hygroplitis	Hygroplitis melligaster		Jose Leonardo Fernandez Triana	jftriana@uoguelph.ca
CNCHYM 01377	Arthropoda	Insecta	Hymenoptera	Braconidae	Microgastrinae		Hygroplitis	Hygroplitis melligaster		Jose Leonardo Fernandez Triana	jftriana@uoguelph.ca
CNCHYM 01378	Arthropoda	Insecta	Hymenoptera	Braconidae	Microgastrinae		Hygroplitis	Hygroplitis melligaster		Jose Leonardo Fernandez Triana	jftriana@uoguelph.ca
BIOUG01082-E12	Arthropoda	Insecta	Hymenoptera	Braconidae	Microgastrinae		Hygroplitis	Hygroplitis melligaster		Jose Leonardo Fernandez Triana	jftriana@uoguelph.ca
CAM0474	Arthropoda	Insecta	Hymenoptera	Braconidae	Microgastrinae		Hygroplitis	Hygroplitis melligaster		Jose Leonardo Fernandez Triana	jftriana@uoguelph.ca
CAM0466	Arthropoda	Insecta	Hymenoptera	Braconidae	Microgastrinae		Hygroplitis	Hygroplitis melligaster		Jose Leonardo Fernandez Triana	jftriana@uoguelph.ca
CAM0472	Arthropoda	Insecta	Hymenoptera	Braconidae	Microgastrinae		Hygroplitis	Hygroplitis melligaster		Jose Leonardo Fernandez Triana	jftriana@uoguelph.ca
CAM0467	Arthropoda	Insecta	Hymenoptera	Braconidae	Microgastrinae		Hygroplitis	Hygroplitis melligaster		Jose Leonardo Fernandez Triana	jftriana@uoguelph.ca
CAM0278	Arthropoda	Insecta	Hymenoptera	Braconidae	Microgastrinae		Pholetesor	Pholetesor bedelliae		Jose Leonardo Fernandez Triana	jftriana@uoguelph.ca
BIOUG04442-A12	Arthropoda	Insecta	Hymenoptera	Braconidae	Microgastrinae		Pholetesor	Pholetesor bedelliae					CollectionsID
HYM00000958	Arthropoda	Insecta	Hymenoptera	Braconidae	Microgastrinae		Pholetesor	Pholetesor bedelliae		Jose Leonardo Fernandez Triana	jftriana@uoguelph.ca
CNCH3205	Arthropoda	Insecta	Hymenoptera	Braconidae	Microgastrinae		Pholetesor	Pholetesor bedelliae		Jose Leonardo Fernandez Triana	jftriana@uoguelph.ca
HYM00000818	Arthropoda	Insecta	Hymenoptera	Braconidae	Microgastrinae		Pholetesor	Pholetesor bedelliae		Jose Leonardo Fernandez Triana	jftriana@uoguelph.ca
CNCH3212	Arthropoda	Insecta	Hymenoptera	Braconidae	Microgastrinae		Pholetesor	Pholetesor bedelliae		Jose Leonardo Fernandez Triana	jftriana@uoguelph.ca
BIOUG07357-A10	Arthropoda	Insecta	Hymenoptera	Braconidae	Microgastrinae		Pholetesor	Pholetesor bedelliae					CollectionsID
HYM00000994	Arthropoda	Insecta	Hymenoptera	Braconidae	Microgastrinae		Pholetesor	Pholetesor bedelliae		Jose Leonardo Fernandez Triana	jftriana@uoguelph.ca
HYM00000974	Arthropoda	Insecta	Hymenoptera	Braconidae	Microgastrinae		Pholetesor	Pholetesor bedelliae		Jose Leonardo Fernandez Triana	jftriana@uoguelph.ca
HYM00000953	Arthropoda	Insecta	Hymenoptera	Braconidae	Microgastrinae		Pholetesor	Pholetesor bedelliae		Jose Leonardo Fernandez Triana	jftriana@uoguelph.ca
HYM00000821.2	Arthropoda	Insecta	Hymenoptera	Braconidae	Microgastrinae		Pholetesor	Pholetesor bedelliae		Jose Leonardo Fernandez Triana	jftriana@uoguelph.ca
CNCHYM 03136	Arthropoda	Insecta	Hymenoptera	Braconidae	Microgastrinae		Pholetesor	Pholetesor bedelliae		J. Whitfield
HYM00000821	Arthropoda	Insecta	Hymenoptera	Braconidae	Microgastrinae		Pholetesor	Pholetesor bedelliae		Jose Leonardo Fernandez Triana	jftriana@uoguelph.ca
HYM00000941	Arthropoda	Insecta	Hymenoptera	Braconidae	Microgastrinae		Pholetesor	Pholetesor bedelliae		Jose Leonardo Fernandez Triana	jftriana@uoguelph.ca
CNCH3209	Arthropoda	Insecta	Hymenoptera	Braconidae	Microgastrinae		Pholetesor	Pholetesor bedelliae		Jose Leonardo Fernandez Triana	jftriana@uoguelph.ca
CNCH3215	Arthropoda	Insecta	Hymenoptera	Braconidae	Microgastrinae		Pholetesor	Pholetesor bedelliae		Jose Leonardo Fernandez Triana	jftriana@uoguelph.ca
CNCHYM 03143	Arthropoda	Insecta	Hymenoptera	Braconidae	Microgastrinae		Pholetesor	Pholetesor bedelliae		J. Whitfield
HYM00000996	Arthropoda	Insecta	Hymenoptera	Braconidae	Microgastrinae		Pholetesor	Pholetesor bedelliae		Jose Leonardo Fernandez Triana	jftriana@uoguelph.ca
CNCH0955	Arthropoda	Insecta	Hymenoptera	Braconidae	Microgastrinae		Pholetesor	Pholetesor bedelliae		Jose Leonardo Fernandez Triana	jftriana@uoguelph.ca
HYM00000948	Arthropoda	Insecta	Hymenoptera	Braconidae	Microgastrinae		Pholetesor	Pholetesor bedelliae		Jose Leonardo Fernandez Triana	jftriana@uoguelph.ca
CNCH3208	Arthropoda	Insecta	Hymenoptera	Braconidae	Microgastrinae		Pholetesor	Pholetesor bedelliae		Jose Leonardo Fernandez Triana	jftriana@uoguelph.ca
HYM00000986	Arthropoda	Insecta	Hymenoptera	Braconidae	Microgastrinae		Pholetesor	Pholetesor bedelliae		Jose Leonardo Fernandez Triana	jftriana@uoguelph.ca
HYM00000820	Arthropoda	Insecta	Hymenoptera	Braconidae	Microgastrinae		Pholetesor	Pholetesor bedelliae		Jose Leonardo Fernandez Triana	jftriana@uoguelph.ca
HYM00000971	Arthropoda	Insecta	Hymenoptera	Braconidae	Microgastrinae		Pholetesor	Pholetesor bedelliae		Jose Leonardo Fernandez Triana	jftriana@uoguelph.ca
HYM00000955	Arthropoda	Insecta	Hymenoptera	Braconidae	Microgastrinae		Pholetesor	Pholetesor bedelliae		Jose Leonardo Fernandez Triana	jftriana@uoguelph.ca
CNCH3306	Arthropoda	Insecta	Hymenoptera	Braconidae	Microgastrinae		Pholetesor	Pholetesor bedelliae		Jose Leonardo Fernandez Triana	jftriana@uoguelph.ca
HYM00000972	Arthropoda	Insecta	Hymenoptera	Braconidae	Microgastrinae		Pholetesor	Pholetesor bedelliae		Jose Leonardo Fernandez Triana	jftriana@uoguelph.ca
HYM00000947	Arthropoda	Insecta	Hymenoptera	Braconidae	Microgastrinae		Pholetesor	Pholetesor bedelliae		Jose Leonardo Fernandez Triana	jftriana@uoguelph.ca
CNCH3310	Arthropoda	Insecta	Hymenoptera	Braconidae	Microgastrinae		Pholetesor	Pholetesor bedelliae		Jose Leonardo Fernandez Triana	jftriana@uoguelph.ca
HYM00000931	Arthropoda	Insecta	Hymenoptera	Braconidae	Microgastrinae		Pholetesor	Pholetesor bedelliae		Jose Leonardo Fernandez Triana	jftriana@uoguelph.ca
HYM00000985	Arthropoda	Insecta	Hymenoptera	Braconidae	Microgastrinae		Pholetesor	Pholetesor bedelliae		Jose Leonardo Fernandez Triana	jftriana@uoguelph.ca
CNCH3203	Arthropoda	Insecta	Hymenoptera	Braconidae	Microgastrinae		Pholetesor	Pholetesor bedelliae		Jose Leonardo Fernandez Triana	jftriana@uoguelph.ca
CNCHYM 03141	Arthropoda	Insecta	Hymenoptera	Braconidae	Microgastrinae		Pholetesor	Pholetesor bedelliae		Jose Leonardo Fernandez Triana	jftriana@uoguelph.ca
CNCH0995	Arthropoda	Insecta	Hymenoptera	Braconidae	Microgastrinae		Pholetesor	Pholetesor bedelliae		Jose Leonardo Fernandez Triana	jftriana@uoguelph.ca
HYM00000331	Arthropoda	Insecta	Hymenoptera	Braconidae	Microgastrinae		Pholetesor	Pholetesor bedelliae		Jose Leonardo Fernandez Triana	jftriana@uoguelph.ca
HYM00000939	Arthropoda	Insecta	Hymenoptera	Braconidae	Microgastrinae		Pholetesor	Pholetesor bedelliae		Jose Leonardo Fernandez Triana	jftriana@uoguelph.ca
HYM00000969	Arthropoda	Insecta	Hymenoptera	Braconidae	Microgastrinae		Pholetesor	Pholetesor bedelliae		Jose Leonardo Fernandez Triana	jftriana@uoguelph.ca
CNCH0993	Arthropoda	Insecta	Hymenoptera	Braconidae	Microgastrinae		Pholetesor	Pholetesor bedelliae		Jose Leonardo Fernandez Triana	jftriana@uoguelph.ca
CNCHYM 03145	Arthropoda	Insecta	Hymenoptera	Braconidae	Microgastrinae		Pholetesor	Pholetesor bedelliae		J. Whitfield
HYM00000819	Arthropoda	Insecta	Hymenoptera	Braconidae	Microgastrinae		Pholetesor	Pholetesor bedelliae		Jose Leonardo Fernandez Triana	jftriana@uoguelph.ca
CNCHYM 03138	Arthropoda	Insecta	Hymenoptera	Braconidae	Microgastrinae		Pholetesor	Pholetesor bedelliae		J. Whitfield
CNCH3204	Arthropoda	Insecta	Hymenoptera	Braconidae	Microgastrinae		Pholetesor	Pholetesor bedelliae		Jose Leonardo Fernandez Triana	jftriana@uoguelph.ca
CNCH3213	Arthropoda	Insecta	Hymenoptera	Braconidae	Microgastrinae		Pholetesor	Pholetesor bedelliae		Jose Leonardo Fernandez Triana	jftriana@uoguelph.ca
BIOUG00989-E07	Arthropoda	Insecta	Hymenoptera	Braconidae	Microgastrinae		Pholetesor	Pholetesor bedelliae		Jose Leonardo Fernandez Triana	jftriana@uoguelph.ca
BIOUG03931-A10	Arthropoda	Insecta	Hymenoptera	Braconidae	Microgastrinae		Pholetesor	Pholetesor bedelliae
CNCH0965	Arthropoda	Insecta	Hymenoptera	Braconidae	Microgastrinae		Pholetesor	Pholetesor bedelliae		Jose Leonardo Fernandez Triana	jftriana@uoguelph.ca
HYM00001322	Arthropoda	Insecta	Hymenoptera	Braconidae	Microgastrinae		Pholetesor	Pholetesor bedelliae		Jose Leonardo Fernandez Triana	jftriana@uoguelph.ca
CAM0437	Arthropoda	Insecta	Hymenoptera	Braconidae	Microgastrinae		Pholetesor	Pholetesor bedelliae		Jose Leonardo Fernandez Triana	jftriana@uoguelph.ca
HYM00000990	Arthropoda	Insecta	Hymenoptera	Braconidae	Microgastrinae		Pholetesor	Pholetesor bedelliae		Jose Leonardo Fernandez Triana	jftriana@uoguelph.ca
CNCHYM 03139	Arthropoda	Insecta	Hymenoptera	Braconidae	Microgastrinae		Pholetesor	Pholetesor bedelliae		J. Whitfield
HYM00000975	Arthropoda	Insecta	Hymenoptera	Braconidae	Microgastrinae		Pholetesor	Pholetesor bedelliae		Jose Leonardo Fernandez Triana	jftriana@uoguelph.ca
CNCH3206	Arthropoda	Insecta	Hymenoptera	Braconidae	Microgastrinae		Pholetesor	Pholetesor bedelliae		Jose Leonardo Fernandez Triana	jftriana@uoguelph.ca
HYM00000935	Arthropoda	Insecta	Hymenoptera	Braconidae	Microgastrinae		Pholetesor	Pholetesor bedelliae		Jose Leonardo Fernandez Triana	jftriana@uoguelph.ca
CNCH1008	Arthropoda	Insecta	Hymenoptera	Braconidae	Microgastrinae		Pholetesor	Pholetesor bedelliae		Jose Leonardo Fernandez Triana	jftriana@uoguelph.ca
HYM00000987	Arthropoda	Insecta	Hymenoptera	Braconidae	Microgastrinae		Pholetesor	Pholetesor bedelliae		Jose Leonardo Fernandez Triana	jftriana@uoguelph.ca
CNCH0987	Arthropoda	Insecta	Hymenoptera	Braconidae	Microgastrinae		Pholetesor	Pholetesor bedelliae		Jose Leonardo Fernandez Triana	jftriana@uoguelph.ca
08BBHYM-1368	Arthropoda	Insecta	Hymenoptera	Braconidae	Microgastrinae		Pholetesor	Pholetesor bedelliae		Jose Leonardo Fernandez Triana	jftriana@uoguelph.ca
HYM00000968	Arthropoda	Insecta	Hymenoptera	Braconidae	Microgastrinae		Pholetesor	Pholetesor bedelliae		Jose Leonardo Fernandez Triana	jftriana@uoguelph.ca
CNCHYM 03144	Arthropoda	Insecta	Hymenoptera	Braconidae	Microgastrinae		Pholetesor	Pholetesor bedelliae		Jose Leonardo Fernandez Triana	jftriana@uoguelph.ca
HYM00000936	Arthropoda	Insecta	Hymenoptera	Braconidae	Microgastrinae		Pholetesor	Pholetesor bedelliae		Jose Leonardo Fernandez Triana	jftriana@uoguelph.ca
HYM00000951	Arthropoda	Insecta	Hymenoptera	Braconidae	Microgastrinae		Pholetesor	Pholetesor bedelliae		Jose Leonardo Fernandez Triana	jftriana@uoguelph.ca
HYM00001320	Arthropoda	Insecta	Hymenoptera	Braconidae	Microgastrinae		Pholetesor	Pholetesor bedelliae		Jose Leonardo Fernandez Triana	jftriana@uoguelph.ca
HYM00000920	Arthropoda	Insecta	Hymenoptera	Braconidae	Microgastrinae		Pholetesor	Pholetesor bedelliae		Jose Leonardo Fernandez Triana	jftriana@uoguelph.ca
CNCHYM 03137	Arthropoda	Insecta	Hymenoptera	Braconidae	Microgastrinae		Pholetesor	Pholetesor bedelliae		Jose Leonardo Fernandez Triana	jftriana@uoguelph.ca
HYM00000820.2	Arthropoda	Insecta	Hymenoptera	Braconidae	Microgastrinae		Pholetesor	Pholetesor bedelliae		Jose Leonardo Fernandez Triana	jftriana@uoguelph.ca
HYM00000976	Arthropoda	Insecta	Hymenoptera	Braconidae	Microgastrinae		Pholetesor	Pholetesor bedelliae		Jose Leonardo Fernandez Triana	jftriana@uoguelph.ca
HYM00000943	Arthropoda	Insecta	Hymenoptera	Braconidae	Microgastrinae		Pholetesor	Pholetesor bedelliae		Jose Leonardo Fernandez Triana	jftriana@uoguelph.ca
HYM00000934	Arthropoda	Insecta	Hymenoptera	Braconidae	Microgastrinae		Pholetesor	Pholetesor bedelliae		Jose Leonardo Fernandez Triana	jftriana@uoguelph.ca
HYM00000938	Arthropoda	Insecta	Hymenoptera	Braconidae	Microgastrinae		Pholetesor	Pholetesor bedelliae		Jose Leonardo Fernandez Triana	jftriana@uoguelph.ca
HYM00000950	Arthropoda	Insecta	Hymenoptera	Braconidae	Microgastrinae		Pholetesor	Pholetesor bedelliae		Jose Leonardo Fernandez Triana	jftriana@uoguelph.ca
HYM00000956	Arthropoda	Insecta	Hymenoptera	Braconidae	Microgastrinae		Pholetesor	Pholetesor bedelliae		Jose Leonardo Fernandez Triana	jftriana@uoguelph.ca
HYM00000973	Arthropoda	Insecta	Hymenoptera	Braconidae	Microgastrinae		Pholetesor	Pholetesor bedelliae		Jose Leonardo Fernandez Triana	jftriana@uoguelph.ca
HYM00000970	Arthropoda	Insecta	Hymenoptera	Braconidae	Microgastrinae		Pholetesor	Pholetesor bedelliae		Jose Leonardo Fernandez Triana	jftriana@uoguelph.ca
HYM00000940	Arthropoda	Insecta	Hymenoptera	Braconidae	Microgastrinae		Pholetesor	Pholetesor bedelliae		Jose Leonardo Fernandez Triana	jftriana@uoguelph.ca
CNCHYM 03142	Arthropoda	Insecta	Hymenoptera	Braconidae	Microgastrinae		Pholetesor	Pholetesor bedelliae		Jose Leonardo Fernandez Triana	jftriana@uoguelph.ca
HYM00000942	Arthropoda	Insecta	Hymenoptera	Braconidae	Microgastrinae		Pholetesor	Pholetesor bedelliae		Jose Leonardo Fernandez Triana	jftriana@uoguelph.ca
CNCHYM 03140	Arthropoda	Insecta	Hymenoptera	Braconidae	Microgastrinae		Pholetesor	Pholetesor bedelliae		Jose Leonardo Fernandez Triana	jftriana@uoguelph.ca
07PROBE-20072	Arthropoda	Insecta	Hymenoptera	Braconidae	Microgastrinae		Pholetesor	Pholetesor bedelliae		Jose Leonardo Fernandez Triana	jftriana@uoguelph.ca
CNCHYM 03217	Arthropoda	Insecta	Hymenoptera	Braconidae	Microgastrinae		Pholetesor	Pholetesor viminetorum		J. Whitfield
HYM00000806	Arthropoda	Insecta	Hymenoptera	Braconidae	Microgastrinae		Pholetesor	Pholetesor viminetorum		Jose Leonardo Fernandez Triana	jftriana@uoguelph.ca
07PROBE-22423	Arthropoda	Insecta	Hymenoptera	Braconidae	Microgastrinae		Pholetesor	Pholetesor viminetorum		Jose Leonardo Fernandez Triana	jftriana@uoguelph.ca
BIOUG14184-G04	Arthropoda	Insecta	Hymenoptera	Braconidae	Microgastrinae		Pholetesor	Pholetesor viminetorum		Angela Telfer	atelfer@uoguelph.ca
HYM00000809.2	Arthropoda	Insecta	Hymenoptera	Braconidae	Microgastrinae		Pholetesor	Pholetesor viminetorum		Jose Leonardo Fernandez Triana	jftriana@uoguelph.ca
10PROBE-29276	Arthropoda	Insecta	Hymenoptera	Braconidae	Microgastrinae		Pholetesor	Pholetesor viminetorum		Jose Leonardo Fernandez Triana	jftriana@uoguelph.ca
HYM00000798	Arthropoda	Insecta	Hymenoptera	Braconidae	Microgastrinae		Pholetesor	Pholetesor viminetorum		Jose Leonardo Fernandez Triana	jftriana@uoguelph.ca
CAM0958	Arthropoda	Insecta	Hymenoptera	Braconidae	Microgastrinae		Pholetesor	Pholetesor viminetorum		Jose Leonardo Fernandez Triana	jftriana@uoguelph.ca
HYM00000981	Arthropoda	Insecta	Hymenoptera	Braconidae	Microgastrinae		Pholetesor	Pholetesor viminetorum		Jose Leonardo Fernandez Triana	jftriana@uoguelph.ca
BIOUG03191-A01	Arthropoda	Insecta	Hymenoptera	Braconidae	Microgastrinae		Pholetesor	Pholetesor viminetorum		Angela Telfer	atelfer@uoguelph.ca		CollectionsID
HYM00000792.2	Arthropoda	Insecta	Hymenoptera	Braconidae	Microgastrinae		Pholetesor	Pholetesor viminetorum		Jose Leonardo Fernandez Triana	jftriana@uoguelph.ca
CAM0427	Arthropoda	Insecta	Hymenoptera	Braconidae	Microgastrinae		Pholetesor	Pholetesor viminetorum		Jose Leonardo Fernandez Triana	jftriana@uoguelph.ca
HYM00000795	Arthropoda	Insecta	Hymenoptera	Braconidae	Microgastrinae		Pholetesor	Pholetesor viminetorum		Jose Leonardo Fernandez Triana	jftriana@uoguelph.ca
HYM00000813	Arthropoda	Insecta	Hymenoptera	Braconidae	Microgastrinae		Pholetesor	Pholetesor viminetorum		Jose Leonardo Fernandez Triana	jftriana@uoguelph.ca
GOU 0582	Arthropoda	Insecta	Hymenoptera	Braconidae	Microgastrinae		Pholetesor	Pholetesor viminetorum		Jose Leonardo Fernandez Triana	jftriana@uoguelph.ca
07PROBE-23399	Arthropoda	Insecta	Hymenoptera	Braconidae	Microgastrinae		Pholetesor	Pholetesor viminetorum		Angela Telfer	atelfer@uoguelph.ca
HYM00000922	Arthropoda	Insecta	Hymenoptera	Braconidae	Microgastrinae		Pholetesor	Pholetesor viminetorum		Jose Leonardo Fernandez Triana	jftriana@uoguelph.ca
CAM0412	Arthropoda	Insecta	Hymenoptera	Braconidae	Microgastrinae		Pholetesor	Pholetesor viminetorum		Jose Leonardo Fernandez Triana	jftriana@uoguelph.ca
07PROBE-23413	Arthropoda	Insecta	Hymenoptera	Braconidae	Microgastrinae		Pholetesor	Pholetesor viminetorum		Jose Leonardo Fernandez Triana	jftriana@uoguelph.ca
10BBCHY-2887	Arthropoda	Insecta	Hymenoptera	Braconidae	Microgastrinae		Pholetesor	Pholetesor viminetorum		Julie K. Stahlhut	julie.stahlhut@icloud.com
CAM0422	Arthropoda	Insecta	Hymenoptera	Braconidae	Microgastrinae		Pholetesor	Pholetesor viminetorum		Jose Leonardo Fernandez Triana	jftriana@uoguelph.ca
HYM00000945	Arthropoda	Insecta	Hymenoptera	Braconidae	Microgastrinae		Pholetesor	Pholetesor viminetorum		Jose Leonardo Fernandez Triana	jftriana@uoguelph.ca
HYM00000814.2	Arthropoda	Insecta	Hymenoptera	Braconidae	Microgastrinae		Pholetesor	Pholetesor viminetorum		Jose Leonardo Fernandez Triana	jftriana@uoguelph.ca
CAM0435	Arthropoda	Insecta	Hymenoptera	Braconidae	Microgastrinae		Pholetesor	Pholetesor viminetorum		Jose Leonardo Fernandez Triana	jftriana@uoguelph.ca
HYM00000801	Arthropoda	Insecta	Hymenoptera	Braconidae	Microgastrinae		Pholetesor	Pholetesor viminetorum		Jose Leonardo Fernandez Triana	jftriana@uoguelph.ca
CAM0959	Arthropoda	Insecta	Hymenoptera	Braconidae	Microgastrinae		Pholetesor	Pholetesor viminetorum		Jose Leonardo Fernandez Triana	jftriana@uoguelph.ca
HYM00000964	Arthropoda	Insecta	Hymenoptera	Braconidae	Microgastrinae		Pholetesor	Pholetesor viminetorum		Jose Leonardo Fernandez Triana	jftriana@uoguelph.ca
HYM00000794	Arthropoda	Insecta	Hymenoptera	Braconidae	Microgastrinae		Pholetesor	Pholetesor viminetorum		Jose Leonardo Fernandez Triana	jftriana@uoguelph.ca
07PROBE-22417	Arthropoda	Insecta	Hymenoptera	Braconidae	Microgastrinae		Pholetesor	Pholetesor viminetorum		Angela Telfer	atelfer@uoguelph.ca
GOU 0590	Arthropoda	Insecta	Hymenoptera	Braconidae	Microgastrinae		Pholetesor	Pholetesor viminetorum		Jose Leonardo Fernandez Triana	jftriana@uoguelph.ca
CAM0936	Arthropoda	Insecta	Hymenoptera	Braconidae	Microgastrinae		Pholetesor	Pholetesor viminetorum		Jose Leonardo Fernandez Triana	jftriana@uoguelph.ca
07PROBE-20806	Arthropoda	Insecta	Hymenoptera	Braconidae	Microgastrinae		Pholetesor	Pholetesor viminetorum		Jose Leonardo Fernandez Triana	jftriana@uoguelph.ca
CAM0434	Arthropoda	Insecta	Hymenoptera	Braconidae	Microgastrinae		Pholetesor	Pholetesor viminetorum		Jose Leonardo Fernandez Triana	jftriana@uoguelph.ca
CAM0948	Arthropoda	Insecta	Hymenoptera	Braconidae	Microgastrinae		Pholetesor	Pholetesor viminetorum		Jose Leonardo Fernandez Triana	jftriana@uoguelph.ca
HYM00000802	Arthropoda	Insecta	Hymenoptera	Braconidae	Microgastrinae		Pholetesor	Pholetesor viminetorum		Jose Leonardo Fernandez Triana	jftriana@uoguelph.ca
HYM00001682	Arthropoda	Insecta	Hymenoptera	Braconidae	Microgastrinae		Pholetesor	Pholetesor viminetorum		Jose Leonardo Fernandez Triana	jftriana@uoguelph.ca
CAM0421	Arthropoda	Insecta	Hymenoptera	Braconidae	Microgastrinae		Pholetesor	Pholetesor viminetorum		Jose Leonardo Fernandez Triana	jftriana@uoguelph.ca
CAM0416	Arthropoda	Insecta	Hymenoptera	Braconidae	Microgastrinae		Pholetesor	Pholetesor viminetorum		Jose Leonardo Fernandez Triana	jftriana@uoguelph.ca
HYM00000815	Arthropoda	Insecta	Hymenoptera	Braconidae	Microgastrinae		Pholetesor	Pholetesor viminetorum		Jose Leonardo Fernandez Triana	jftriana@uoguelph.ca
CAM0428	Arthropoda	Insecta	Hymenoptera	Braconidae	Microgastrinae		Pholetesor	Pholetesor viminetorum		Jose Leonardo Fernandez Triana	jftriana@uoguelph.ca
HYM00000816	Arthropoda	Insecta	Hymenoptera	Braconidae	Microgastrinae		Pholetesor	Pholetesor viminetorum		Jose Leonardo Fernandez Triana	jftriana@uoguelph.ca
07PROBE-20818	Arthropoda	Insecta	Hymenoptera	Braconidae	Microgastrinae		Pholetesor	Pholetesor viminetorum		Jose Leonardo Fernandez Triana	jftriana@uoguelph.ca
CAM0386	Arthropoda	Insecta	Hymenoptera	Braconidae	Microgastrinae		Pholetesor	Pholetesor viminetorum		Jose Leonardo Fernandez Triana	jftriana@uoguelph.ca
CAM0387	Arthropoda	Insecta	Hymenoptera	Braconidae	Microgastrinae		Pholetesor	Pholetesor viminetorum		Jose Leonardo Fernandez Triana	jftriana@uoguelph.ca
CAM0944	Arthropoda	Insecta	Hymenoptera	Braconidae	Microgastrinae		Pholetesor	Pholetesor viminetorum		Jose Leonardo Fernandez Triana	jftriana@uoguelph.ca
CNCHYM 03216	Arthropoda	Insecta	Hymenoptera	Braconidae	Microgastrinae		Pholetesor	Pholetesor viminetorum		J. Whitfield
CAM0952	Arthropoda	Insecta	Hymenoptera	Braconidae	Microgastrinae		Pholetesor	Pholetesor viminetorum		Jose Leonardo Fernandez Triana	jftriana@uoguelph.ca
HYM00000815.2	Arthropoda	Insecta	Hymenoptera	Braconidae	Microgastrinae		Pholetesor	Pholetesor viminetorum		Jose Leonardo Fernandez Triana	jftriana@uoguelph.ca
CAM0426	Arthropoda	Insecta	Hymenoptera	Braconidae	Microgastrinae		Pholetesor	Pholetesor viminetorum		Jose Leonardo Fernandez Triana	jftriana@uoguelph.ca
10PROBE-28643	Arthropoda	Insecta	Hymenoptera	Braconidae	Microgastrinae		Pholetesor	Pholetesor viminetorum		Jose Leonardo Fernandez Triana	jftriana@uoguelph.ca
HYM00000811.2	Arthropoda	Insecta	Hymenoptera	Braconidae	Microgastrinae		Pholetesor	Pholetesor viminetorum		Jose Leonardo Fernandez Triana	jftriana@uoguelph.ca
CAM0492	Arthropoda	Insecta	Hymenoptera	Braconidae	Microgastrinae		Pholetesor	Pholetesor viminetorum		Jose Leonardo Fernandez Triana	jftriana@uoguelph.ca
CAM0945	Arthropoda	Insecta	Hymenoptera	Braconidae	Microgastrinae		Pholetesor	Pholetesor viminetorum		Jose Leonardo Fernandez Triana	jftriana@uoguelph.ca
HYM00000603	Arthropoda	Insecta	Hymenoptera	Braconidae	Microgastrinae		Pholetesor	Pholetesor viminetorum		Jose Leonardo Fernandez Triana	jftriana@uoguelph.ca
CAM0951	Arthropoda	Insecta	Hymenoptera	Braconidae	Microgastrinae		Pholetesor	Pholetesor viminetorum		Jose Leonardo Fernandez Triana	jftriana@uoguelph.ca
HYM00000989	Arthropoda	Insecta	Hymenoptera	Braconidae	Microgastrinae		Pholetesor	Pholetesor viminetorum		Jose Leonardo Fernandez Triana	jftriana@uoguelph.ca
MIC 000900	Arthropoda	Insecta	Hymenoptera	Braconidae	Microgastrinae		Pholetesor	Pholetesor viminetorum		Jose Leonardo Fernandez Triana	jftriana@uoguelph.ca
07PROBE-20808	Arthropoda	Insecta	Hymenoptera	Braconidae	Microgastrinae		Pholetesor	Pholetesor viminetorum		Jose Leonardo Fernandez Triana	jftriana@uoguelph.ca
CAM0365	Arthropoda	Insecta	Hymenoptera	Braconidae	Microgastrinae		Pholetesor	Pholetesor viminetorum		Jose Leonardo Fernandez Triana	jftriana@uoguelph.ca
CAM0384	Arthropoda	Insecta	Hymenoptera	Braconidae	Microgastrinae		Pholetesor	Pholetesor viminetorum		Jose Leonardo Fernandez Triana	jftriana@uoguelph.ca
CAM0431	Arthropoda	Insecta	Hymenoptera	Braconidae	Microgastrinae		Pholetesor	Pholetesor viminetorum		Jose Leonardo Fernandez Triana	jftriana@uoguelph.ca
CNCHYM 03218	Arthropoda	Insecta	Hymenoptera	Braconidae	Microgastrinae		Pholetesor	Pholetesor viminetorum		J. Whitfield
MIC 000721	Arthropoda	Insecta	Hymenoptera	Braconidae	Microgastrinae		Pholetesor	Pholetesor viminetorum		Jose Leonardo Fernandez Triana	jftriana@uoguelph.ca
HYM00000803	Arthropoda	Insecta	Hymenoptera	Braconidae	Microgastrinae		Pholetesor	Pholetesor viminetorum		Jose Leonardo Fernandez Triana	jftriana@uoguelph.ca
GOU 0589	Arthropoda	Insecta	Hymenoptera	Braconidae	Microgastrinae		Pholetesor	Pholetesor viminetorum		Jose Leonardo Fernandez Triana	jftriana@uoguelph.ca
HYM00000813.2	Arthropoda	Insecta	Hymenoptera	Braconidae	Microgastrinae		Pholetesor	Pholetesor viminetorum		Jose Leonardo Fernandez Triana	jftriana@uoguelph.ca
CAM0488	Arthropoda	Insecta	Hymenoptera	Braconidae	Microgastrinae		Pholetesor	Pholetesor viminetorum		Jose Leonardo Fernandez Triana	jftriana@uoguelph.ca
HYM00000792	Arthropoda	Insecta	Hymenoptera	Braconidae	Microgastrinae		Pholetesor	Pholetesor viminetorum		Jose Leonardo Fernandez Triana	jftriana@uoguelph.ca
HYM00000932	Arthropoda	Insecta	Hymenoptera	Braconidae	Microgastrinae		Pholetesor	Pholetesor viminetorum		Jose Leonardo Fernandez Triana	jftriana@uoguelph.ca
BIOUG05353-G06	Arthropoda	Insecta	Hymenoptera	Braconidae	Microgastrinae		Pholetesor	Pholetesor viminetorum		Angela Telfer	atelfer@uoguelph.ca		CollectionsID
HYM00001312	Arthropoda	Insecta	Hymenoptera	Braconidae	Microgastrinae		Pholetesor	Pholetesor viminetorum		Jose Leonardo Fernandez Triana	jftriana@uoguelph.ca
MIC 000350	Arthropoda	Insecta	Hymenoptera	Braconidae	Microgastrinae		Pholetesor	Pholetesor viminetorum		Jose Leonardo Fernandez Triana	jftriana@uoguelph.ca
HYM00000982	Arthropoda	Insecta	Hymenoptera	Braconidae	Microgastrinae		Pholetesor	Pholetesor viminetorum		Jose Leonardo Fernandez Triana	jftriana@uoguelph.ca
10BBCHY-2879	Arthropoda	Insecta	Hymenoptera	Braconidae	Microgastrinae		Pholetesor	Pholetesor viminetorum		Julie K. Stahlhut	julie.stahlhut@icloud.com
09BBEHY-1128	Arthropoda	Insecta	Hymenoptera	Braconidae	Microgastrinae		Pholetesor	Pholetesor viminetorum
HYM00000944	Arthropoda	Insecta	Hymenoptera	Braconidae	Microgastrinae		Pholetesor	Pholetesor viminetorum		Jose Leonardo Fernandez Triana	jftriana@uoguelph.ca
HYM00001329	Arthropoda	Insecta	Hymenoptera	Braconidae	Microgastrinae		Pholetesor	Pholetesor viminetorum		Jose Leonardo Fernandez Triana	jftriana@uoguelph.ca
09PROBE-A0342	Arthropoda	Insecta	Hymenoptera	Braconidae	Microgastrinae		Pholetesor	Pholetesor viminetorum		Angela Telfer	atelfer@uoguelph.ca
HYM00000804	Arthropoda	Insecta	Hymenoptera	Braconidae	Microgastrinae		Pholetesor	Pholetesor viminetorum		Jose Leonardo Fernandez Triana	jftriana@uoguelph.ca
07PROBE-24572	Arthropoda	Insecta	Hymenoptera	Braconidae	Microgastrinae		Pholetesor	Pholetesor viminetorum		Jose Leonardo Fernandez Triana	jftriana@uoguelph.ca
CAM0415	Arthropoda	Insecta	Hymenoptera	Braconidae	Microgastrinae		Pholetesor	Pholetesor viminetorum		Jose Leonardo Fernandez Triana	jftriana@uoguelph.ca
MIC 000723	Arthropoda	Insecta	Hymenoptera	Braconidae	Microgastrinae		Pholetesor	Pholetesor viminetorum		Jose Leonardo Fernandez Triana	jftriana@uoguelph.ca
HYM00000793.2	Arthropoda	Insecta	Hymenoptera	Braconidae	Microgastrinae		Pholetesor	Pholetesor viminetorum		Jose Leonardo Fernandez Triana	jftriana@uoguelph.ca
HYM00000812	Arthropoda	Insecta	Hymenoptera	Braconidae	Microgastrinae		Pholetesor	Pholetesor viminetorum		Jose Leonardo Fernandez Triana	jftriana@uoguelph.ca
HYM00000796	Arthropoda	Insecta	Hymenoptera	Braconidae	Microgastrinae		Pholetesor	Pholetesor viminetorum		Jose Leonardo Fernandez Triana	jftriana@uoguelph.ca
HYM00000797	Arthropoda	Insecta	Hymenoptera	Braconidae	Microgastrinae		Pholetesor	Pholetesor viminetorum		Jose Leonardo Fernandez Triana	jftriana@uoguelph.ca
CAM0417	Arthropoda	Insecta	Hymenoptera	Braconidae	Microgastrinae		Pholetesor	Pholetesor viminetorum		Jose Leonardo Fernandez Triana	jftriana@uoguelph.ca
07PROBE-20789	Arthropoda	Insecta	Hymenoptera	Braconidae	Microgastrinae		Pholetesor	Pholetesor viminetorum		Jose Leonardo Fernandez Triana	jftriana@uoguelph.ca
GOU 0588	Arthropoda	Insecta	Hymenoptera	Braconidae	Microgastrinae		Pholetesor	Pholetesor viminetorum		Jose Leonardo Fernandez Triana	jftriana@uoguelph.ca
CAM0403	Arthropoda	Insecta	Hymenoptera	Braconidae	Microgastrinae		Pholetesor	Pholetesor viminetorum		Jose Leonardo Fernandez Triana	jftriana@uoguelph.ca
MIC 000722	Arthropoda	Insecta	Hymenoptera	Braconidae	Microgastrinae		Pholetesor	Pholetesor viminetorum		Jose Leonardo Fernandez Triana	jftriana@uoguelph.ca
CAM0419	Arthropoda	Insecta	Hymenoptera	Braconidae	Microgastrinae		Pholetesor	Pholetesor viminetorum		Jose Leonardo Fernandez Triana	jftriana@uoguelph.ca
CAM0414	Arthropoda	Insecta	Hymenoptera	Braconidae	Microgastrinae		Pholetesor	Pholetesor viminetorum		Jose Leonardo Fernandez Triana	jftriana@uoguelph.ca
BIOUG03882-B11	Arthropoda	Insecta	Hymenoptera	Braconidae	Microgastrinae		Pholetesor	Pholetesor viminetorum		Angela Telfer	atelfer@uoguelph.ca		CollectionsID
HYM00000810	Arthropoda	Insecta	Hymenoptera	Braconidae	Microgastrinae		Pholetesor	Pholetesor viminetorum		Jose Leonardo Fernandez Triana	jftriana@uoguelph.ca
BIOUG07032-G03	Arthropoda	Insecta	Hymenoptera	Braconidae	Microgastrinae		Pholetesor	Pholetesor viminetorum		Angela Telfer	atelfer@uoguelph.ca		CollectionsID
CAM0430	Arthropoda	Insecta	Hymenoptera	Braconidae	Microgastrinae		Pholetesor	Pholetesor viminetorum		Jose Leonardo Fernandez Triana	jftriana@uoguelph.ca
HYM00000800	Arthropoda	Insecta	Hymenoptera	Braconidae	Microgastrinae		Pholetesor	Pholetesor viminetorum		Jose Leonardo Fernandez Triana	jftriana@uoguelph.ca
CAM0418	Arthropoda	Insecta	Hymenoptera	Braconidae	Microgastrinae		Pholetesor	Pholetesor viminetorum		Jose Leonardo Fernandez Triana	jftriana@uoguelph.ca
MIC 000923	Arthropoda	Insecta	Hymenoptera	Braconidae	Microgastrinae		Pholetesor	Pholetesor viminetorum		Jose Leonardo Fernandez Triana	jftriana@uoguelph.ca
CAM0383	Arthropoda	Insecta	Hymenoptera	Braconidae	Microgastrinae		Pholetesor	Pholetesor viminetorum		Jose Leonardo Fernandez Triana	jftriana@uoguelph.ca
HYM00000793	Arthropoda	Insecta	Hymenoptera	Braconidae	Microgastrinae		Pholetesor	Pholetesor viminetorum		Jose Leonardo Fernandez Triana	jftriana@uoguelph.ca
HYM00000808	Arthropoda	Insecta	Hymenoptera	Braconidae	Microgastrinae		Pholetesor	Pholetesor viminetorum		Jose Leonardo Fernandez Triana	jftriana@uoguelph.ca
HYM00000962	Arthropoda	Insecta	Hymenoptera	Braconidae	Microgastrinae		Pholetesor	Pholetesor viminetorum		Jose Leonardo Fernandez Triana	jftriana@uoguelph.ca
HYM00000814	Arthropoda	Insecta	Hymenoptera	Braconidae	Microgastrinae		Pholetesor	Pholetesor viminetorum		Jose Leonardo Fernandez Triana	jftriana@uoguelph.ca
CAM0953	Arthropoda	Insecta	Hymenoptera	Braconidae	Microgastrinae		Pholetesor	Pholetesor viminetorum		Jose Leonardo Fernandez Triana	jftriana@uoguelph.ca
HYM00000604	Arthropoda	Insecta	Hymenoptera	Braconidae	Microgastrinae		Pholetesor	Pholetesor viminetorum		Jose Leonardo Fernandez Triana	jftriana@uoguelph.ca
CAM0429	Arthropoda	Insecta	Hymenoptera	Braconidae	Microgastrinae		Pholetesor	Pholetesor viminetorum		Jose Leonardo Fernandez Triana	jftriana@uoguelph.ca
CAM0382	Arthropoda	Insecta	Hymenoptera	Braconidae	Microgastrinae		Pholetesor	Pholetesor viminetorum		Jose Leonardo Fernandez Triana	jftriana@uoguelph.ca
CAM0385	Arthropoda	Insecta	Hymenoptera	Braconidae	Microgastrinae		Pholetesor	Pholetesor viminetorum		Jose Leonardo Fernandez Triana	jftriana@uoguelph.ca
08BBHYM-1493	Arthropoda	Insecta	Hymenoptera	Braconidae	Microgastrinae		Pholetesor	Pholetesor viminetorum		Jose Leonardo Fernandez Triana	jftriana@uoguelph.ca
CAM0438	Arthropoda	Insecta	Hymenoptera	Braconidae	Microgastrinae		Pholetesor	Pholetesor viminetorum		Jose Leonardo Fernandez Triana	jftriana@uoguelph.ca
CAM0423	Arthropoda	Insecta	Hymenoptera	Braconidae	Microgastrinae		Pholetesor	Pholetesor viminetorum		Jose Leonardo Fernandez Triana	jftriana@uoguelph.ca
BIOUG03593-B08	Arthropoda	Insecta	Hymenoptera	Braconidae	Microgastrinae		Pholetesor	Pholetesor viminetorum		Angela Telfer	atelfer@uoguelph.ca		CollectionsID
HYM00000767	Arthropoda	Insecta	Hymenoptera	Braconidae	Microgastrinae		Pholetesor	Pholetesor viminetorum		Jose Leonardo Fernandez Triana	jftriana@uoguelph.ca
HYM00000817	Arthropoda	Insecta	Hymenoptera	Braconidae	Microgastrinae		Pholetesor	Pholetesor viminetorum		Jose Leonardo Fernandez Triana	jftriana@uoguelph.ca
HYM00000805	Arthropoda	Insecta	Hymenoptera	Braconidae	Microgastrinae		Pholetesor	Pholetesor viminetorum		Jose Leonardo Fernandez Triana	jftriana@uoguelph.ca
HYM00000809	Arthropoda	Insecta	Hymenoptera	Braconidae	Microgastrinae		Pholetesor	Pholetesor viminetorum		Jose Leonardo Fernandez Triana	jftriana@uoguelph.ca
HYM00000811	Arthropoda	Insecta	Hymenoptera	Braconidae	Microgastrinae		Pholetesor	Pholetesor viminetorum		Jose Leonardo Fernandez Triana	jftriana@uoguelph.ca
CAM0432	Arthropoda	Insecta	Hymenoptera	Braconidae	Microgastrinae		Pholetesor	Pholetesor viminetorum		Jose Leonardo Fernandez Triana	jftriana@uoguelph.ca
HYM00000921	Arthropoda	Insecta	Hymenoptera	Braconidae	Microgastrinae		Pholetesor	Pholetesor viminetorum		Jose Leonardo Fernandez Triana	jftriana@uoguelph.ca
MIC 000909	Arthropoda	Insecta	Hymenoptera	Braconidae	Microgastrinae		Pholetesor	Pholetesor viminetorum		Jose Leonardo Fernandez Triana	jftriana@uoguelph.ca
CAM0957	Arthropoda	Insecta	Hymenoptera	Braconidae	Microgastrinae		Pholetesor	Pholetesor viminetorum		Jose Leonardo Fernandez Triana	jftriana@uoguelph.ca
CAM0955	Arthropoda	Insecta	Hymenoptera	Braconidae	Microgastrinae		Pholetesor	Pholetesor viminetorum		Jose Leonardo Fernandez Triana	jftriana@uoguelph.ca
HYM00000799	Arthropoda	Insecta	Hymenoptera	Braconidae	Microgastrinae		Pholetesor	Pholetesor viminetorum		Jose Leonardo Fernandez Triana	jftriana@uoguelph.ca
HYM00000921.2	Arthropoda	Insecta	Hymenoptera	Braconidae	Microgastrinae		Pholetesor	Pholetesor viminetorum		Jose Leonardo Fernandez Triana	jftriana@uoguelph.ca
HYM00000807	Arthropoda	Insecta	Hymenoptera	Braconidae	Microgastrinae		Pholetesor	Pholetesor viminetorum		Jose Leonardo Fernandez Triana	jftriana@uoguelph.ca

## Sheet: Specimen Details
Project:	SEARCH: Sample ids(633 ids), Include public records			User :	Jose Leonardo Fernandez Triana
Created :	24-September-2014
Sample ID	Sex	Reproduction	Life Stage	Extra Info	Notes	Voucher Status	Tissue Descriptor	External URLs	Associated Taxa	Associated Specimens
CAM0023		S	A
BIOUG01088-A03			A		July 16-18 2010
CAM0036		S	A
MIC 000034	F	S	A
MIC 000041	M	S	A
MIC 000036	F	S	A
BIOUG01631-B09
CAM0104		S	A
MIC 000035	F	S	A
CNCHYM 00081		S	A
CAM0117		S	A
CAM0021		S	A
CAM0046		S	A
MIC 000040	M	S	A
CAM0053		S	A
CAM0063		S	A
CAM0020		S	A
CAM0058		S	A
CAM0026		S	A
CAM0049		S	A
MIC 000037	F	S	A
MIC 000033	F	S	A
MIC 000038	F	S	A
CAM0042		S	A
CNCHYM 00088		S	A
MIC 000908		S	A
BIOUG10353-H05		S	A	Forillon National Park	Collected from 15 Jul 2013 - 22 Jul 2013	museum voucher
MIC 000905		S	A
BIOUG00989-E12			A	Windy Bluff
BIOUG01252-E11		S	A		August 2-4 2010
BIOUG07019-B11		S		Waterton Lakes NP	Collected from July 17 to 24 2012	museum voucher
BIOUG10403-A09		S	A	Forillon National Park	Collected from 15 Jul 2013 - 22 Jul 2013	museum voucher
MIC 000063	F	S	A
BIOUG10360-E02		S	A	Forillon National Park	Collected from 15 Jul 2013 - 22 Jul 2013	museum voucher
BIOUG10358-C12		S	A	Forillon National Park	Collected from 15 Jul 2013 - 22 Jul 2013	museum voucher
BIOUG00989-F01			A	Windy Bluff
BIOUG11905-C04			A	Forillon National Park	Collected from 5 Jul 2013 - 15 Jul 2013	museum voucher
MIC 000902		S	A
MIC 000058	F	S	A		Homotype
CAM0096		S	A
BIOUG11907-E10			A	Forillon National Park	Collected from 5 Jul 2013 - 15 Jul 2013	museum voucher
CAM1013		S	A
BIOUG01631-H02		S	A		Sep 9-20, 2011
CNCHYM 00089		S	A
BIOUG04245-B10		S	A	Waterton Lakes NP	Collected from July 24 to 31 2012	museum voucher
BIOUG00989-E09			A	Windy Bluff
BIOUG11904-F02			A	Forillon National Park	Collected from 5 Jul 2013 - 15 Jul 2013	museum voucher
10BBCHY-2243		S	A	Prince Albert NP	Collected from Aug 14-17
MIC 000600		S	A
PCPP10-0759		S	A	Point Pelee NP
BIOUG11909-G05			A	Forillon National Park	Collected from 5 Jul 2013 - 15 Jul 2013	museum voucher
BIOUG00991-A05			A	Windy Bluff
BIOUG00914-E04			A	Windy Bluff
BIOUG00914-E03			A	Windy Bluff
BIOUG10961-E03		S	A	Prince Edward Island National Park	Collected from 10 Jul 2013 - 17 Jul 2013: 2 malaise traps combined (+GMP#01363)	museum voucher
BIOUG08661-F09		S	A	Mountsberg Conservation Area	Malaise 22-Sep-13 to 28-Sep-13	museum voucher
BIOUG07067-E03		S	A	Waterton Lakes NP	Collected from July 31 to August 7 2012	museum voucher
BIOUG01280-G04		S	A		August 27- September 1 2010
CAM0160		S	A
BIOUG06873-E09		S	A	Waterton Lakes NP	Collected from July 17 to 24 2012	museum voucher
BIOUG12293-G01			A	Forillon National Park	Collected from 5 Aug 2013 - 12 Aug 2013: 2 malaise traps combined (+GMP#01459)	museum voucher
BIOUG10408-B06		S	A	Forillon National Park	Collected from 15 Jul 2013 - 22 Jul 2013	museum voucher
BIOUG00989-E11			A	Windy Bluff
BIOUG10358-E06		S	A	Forillon National Park	Collected from 15 Jul 2013 - 22 Jul 2013	museum voucher
BIOUG00861-G06		S	A		Oct 11-19
BIOUG10550-D04		S	A	Forillon National Park	Collected from 30 Jul 2013 - 5 Aug 2013: 2 malaise traps combined (+GMP#01457)	museum voucher
BIOUG02507-D09		S	A		Sep 5-12
BIOUG10403-A08		S	A	Forillon National Park	Collected from 15 Jul 2013 - 22 Jul 2013	museum voucher
BIOUG00914-E07			A	Windy Bluff
CAM0147		S	A
BIOUG00988-A09			A	25 Division St.
BIOUG11910-C01			A	Forillon National Park	Collected from 5 Jul 2013 - 15 Jul 2013	museum voucher
BIOUG04245-A01		S	A	Waterton Lakes NP	Collected from July 24 to 31 2012	museum voucher
BIOUG00914-F08			A	Windy Bluff
BIOUG10661-F02		S	A	Forillon National Park	Collected from 30 Jul 2013 - 5 Aug 2013: 2 malaise traps combined (+GMP#01457)	museum voucher
BIOUG11910-B12			A	Forillon National Park	Collected from 5 Jul 2013 - 15 Jul 2013	museum voucher
CNCHYM 00093		S	A	Ex. Under Caterpillar on convolvulus atvensis
CAM0005		S	A
CAM0085		S	A
BIOUG00989-A08			A	25 Division St.
BIOUG08192-F10		S	A	Prince Albert NP	Collected from July 10-14	museum voucher
BIOUG01330-D09		S	A		October 14-22 2010
BIOUG10353-G01		S	A	Forillon National Park	Collected from 15 Jul 2013 - 22 Jul 2013	museum voucher
BIOUG00914-G01			A	Windy Bluff
BIOUG07067-C07		S	A	Waterton Lakes NP	Collected from July 17 to 24 2012	museum voucher
BIOUG12037-E03			A	Forillon National Park	Collected from 22 Jul 2013 - 30 Jul 2013: 2 malaise traps combined (+GMP#01455)	museum voucher
MIC 000061	F	S	A
BIOUG00989-E10			A	Windy Bluff
BIOUG10405-G04		S	A	Forillon National Park	Collected from 15 Jul 2013 - 22 Jul 2013	museum voucher
MIC 000060	F	S	A
CAM0159		S	A
BIOUG13530-A05			A	Rouge National Urban Park	5 min sweeping (3), 3 sweepers (4 sweeps), partly cloudy/light drizzle	museum voucher
BIOUG00914-F06			A	Windy Bluff
CNCHYM 03970		S	A
BIOUG04245-C02		S	A	Waterton Lakes NP	Collected from July 24 to 31 2012	museum voucher
BIOUG00989-G12			A	Windy Bluff
BIOUG01309-D01		S	A		Sep 19-27
BIOUG00914-E08			A	Windy Bluff
BIOUG11908-H02			A	Forillon National Park	Collected from 5 Jul 2013 - 15 Jul 2013	museum voucher
BIOUG11903-A01			A	Forillon National Park	Collected from 5 Jul 2013 - 15 Jul 2013	museum voucher
BIOUG12293-B06			A	Forillon National Park	Collected from 5 Aug 2013 - 12 Aug 2013: 2 malaise traps combined (+GMP#01459)	museum voucher
BIOUG10405-C03		S	A	Forillon National Park	Collected from 15 Jul 2013 - 22 Jul 2013	museum voucher
BIOUG06873-G07		S	A	Waterton Lakes NP	Collected from July 17 to 24 2012	museum voucher
MIC 000059	F	S	A
CNCHYM 00090		S	A
MIC 000064	M	S	A
BIOUG11904-C07			A	Forillon National Park	Collected from 5 Jul 2013 - 15 Jul 2013	museum voucher
BIOUG00991-B06			A	Windy Bluff
BIOUG09238-D12		S	A	Prince Albert NP		museum voucher
BIOUG12038-B01			A	Forillon National Park	Collected from 22 Jul 2013 - 30 Jul 2013: 2 malaise traps combined (+GMP#01455)	museum voucher
BIOUG00989-A07			A	25 Division St.
BIOUG10479-G03		S	A	Forillon National Park	Collected from 15 Jul 2013 - 22 Jul 2013	museum voucher
BIOUG11908-G11			A	Forillon National Park	Collected from 5 Jul 2013 - 15 Jul 2013	museum voucher
BIOUG03486-E11		S	A	Waterton Lakes NP	Collected from July 24 to 31 2012	museum voucher
WMIC 0240		S	A
BIOUG04245-B04		S	A	Waterton Lakes NP	Collected from July 24 to 31 2012	museum voucher
MIC 000062	F	S	A
BIOUG11907-B04			A	Forillon National Park	Collected from 5 Jul 2013 - 15 Jul 2013	museum voucher
BIOUG01327-H05		S	A		October 01-08 2010
BIOUG11625-E04		S	A	Pukaskwa National Park	Collected from 19 Aug 2013 - 26 Aug 2013: 2 malaise traps combined (+GMP#01511)	museum voucher
BIOUG01657-E06		S	A	North Bear	Collected Sept 20-Oct 6 2011
07PROBE-22328		S	A		<VERBATIM LOCALITY>|Ramsay Creek|58.754|-93.949|</VERBATIM LOCALITY>
BIOUG11759-F05		S	A	Kejimkujik National Park	Collected from 18 Jul 2013 - 25 Jul 2013: 2 malaise traps combined (+GMP#01277)	museum voucher
CAM0960		S	A
BIOUG14172-C09				Pukaskwa National Park	Collected from 26 Aug 2013 - 2 Sep 2013: 2 malaise traps combined (+GMP#01513)	museum voucher
BIOUG01631-D07		S	A		Sep 9-20, 2011
BIOUG08683-C10		S	A	Biodiversity Institute of Ontario	Collected Sept 23-27, min temp: 4C, max temp: 40C	museum voucher
BIOUG14172-G04				Pukaskwa National Park	Collected from 26 Aug 2013 - 2 Sep 2013: 2 malaise traps combined (+GMP#01513)	museum voucher
CAM0009		S	A
BIOUG08669-D07		S	A	Biodiversity Institute of Ontario	Collected June 6 - June 13, 2013. Overcast, 17C on day of collection. Weekly min: 9C, max: 30C	museum voucher
CAM0940		S	A
MIC 000087	F	S	A
BIOUG08641-D09		S	A	Guelph, John F. Ross C.V.I.	Collected from 23-Sept-13 to 27-Sept-240	museum voucher
BIOUG08683-G07		S	A	Biodiversity Institute of Ontario	Collected Sept 23-27, min temp: 4C, max temp: 40C	museum voucher
BIOUG08663-H08		S	A	Paris, Holy Family School	Collected from 23-Sept-13 to 27-Sept-205	museum voucher
BIOUG09765-A01		S	A	Rouge National Urban Park	Malaise 20-Aug-13 to 27-Aug-13: 2 traps combined (+GMP#01071)	museum voucher
BIOUG08683-C04		S	A	Biodiversity Institute of Ontario	Collected Sept 23-27, min temp: 4C, max temp: 40C	museum voucher
BIOUG14108-F04				Pukaskwa National Park	Collected from 26 Aug 2013 - 2 Sep 2013: 2 malaise traps combined (+GMP#01513)	museum voucher
BIOUG08647-G04		S	A	St. Marys, Little Falls Public School	Collected from 23-Sept-13 to 27-Sept-193	museum voucher
BIOUG09932-C07		S	A	Biodiversity Institute of Ontario	Collected Sept 30 - Oct 4, sunny week, min temp: 7C, max temp: 39C	museum voucher
HYM00001023		S	A
BIOUG10202-A04		S	A	Georgian Bay Islands National Park	Collected from 19 Aug 2013 - 27 Aug 2013: 2 malaise traps combined (+GMP#01545)	museum voucher
CAM0342		S	A
MIC 000903		S	A
BIOUG11707-A06		S	A	Pukaskwa National Park	Collected from 19 Aug 2013 - 26 Aug 2013: 2 malaise traps combined (+GMP#01511)	museum voucher
HYM00001022		S	A
BIOUG06823-D09		S	A	Thousand Islands NP	Collected from August 10 to 17 2012	museum voucher
BIOUG08647-C01		S	A	St. Marys, Little Falls Public School	Collected from 23-Sept-13 to 27-Sept-244	museum voucher
MIC 000910		S	A
CAM0526		S	A
CAM0962		S	A
MIC 000493		S	A
BIOUG06549-D07		S	A	Wood Buffalo NP	Collected from August 2 to 10 2012	museum voucher
BIOUG03220-A01		S	A	Point Pelee NP	Collected from May 30 to June 6 2012	museum voucher
CAM0290		S	A
MIC 000637		S	A
CAM0011		S	A
HYM00001027		S	A
BIOUG06823-E10		S	A	Thousand Islands NP	Collected from August 10 to 17 2012	museum voucher
CAM0939		S	A
BIOUG11771-G06		S	A	Pukaskwa National Park	Collected from 19 Aug 2013 - 26 Aug 2013: 2 malaise traps combined (+GMP#01511)	museum voucher
BIOUG08748-E07		S	A	Biodiversity Institute of Ontario	Collected June 20 - June 27, 2013.Very hot and sunny week, 24C on day of collection. Weekly min: 17C, max: 39C	museum voucher
CAM0352		S	A
CAM0448		S	A
BIOUG09807-F11		S	A	Biodiversity Institute of Ontario	Collected Sep 12-19, 2013. Mixed temperatures. Weekly min: 3C max: 36C	museum voucher
BIOUG06471-C10		S	A	Banff NP	Collected from July 23-28	museum voucher
CNCH3194		S	A
BIOUG03220-F05		S	A	Point Pelee NP	Collected from May 30 to June 6 2012	museum voucher
CAM0289		S	A
BIOUG01657-F10		S	A	North Bear	Collected Sept 20-Oct 6 2011
CAM0344		S	A
HYM00001003		S	A
CAM0525		S	A
BIOUG08643-F01		S	A	Whitby, Donald A. Wilson Secondary School	Collected from 23-Sept-13 to 27-Sept-268	museum voucher
MIC 000090	F	S	A
BIOUG00761-A09		S	A		sweep net collected by Paul Hebert sweep net ethanol
HYM00000665.2		S	A		<VERBATIM LOCALITY>|Churchill (general coordinate)|58.78|-94.186|</VERBATIM LOCALITY>
BIOUG09925-E09		S	A	Biodiversity Institute of Ontario	Collected Sept 23-27, min temp: 4C, max temp: 40C	museum voucher
MIC 000084	F	S	A
BIOUG01572-H03		S	A	Prairie Smoke	Collected Sept 20-Oct 6 2011
CAM0114		S	A
BIOUG14107-D02				Pukaskwa National Park	Collected from 26 Aug 2013 - 2 Sep 2013: 2 malaise traps combined (+GMP#01513)	museum voucher
CAM0345		S	A
CAM0963		S	A
CAM0288		S	A
CAM0341		S	A
CAM0106		S	A
BIOUG06823-E06		S	A	Thousand Islands NP	Collected from August 10 to 17 2012	museum voucher
HYM00001019		S	A
CAM0154		S	A
CAM0340		S	A
HYM00001028		S	A
HYM00001024		S	A
CAM0161		S	A
BIOUG12486-D10				Mingan Archipelago National Park Reserve	Collected from 30 Jul 2013 - 6 Aug 2013: B	museum voucher
PCPP10-0466		S	A	Point Pelee NP
BIOUG12736-B05			A	Kejimkujik National Park	Collected from 11 Jul 2013 - 18 Jul 2013: 2 malaise traps combined (+GMP#01275)	museum voucher
10BBHYM-1225		S	A	Kissimmee Prairie Preserve SP	Malaise Trap|Mar 4-7
HYM00001004		S	A
CAM0008		S	A
BIOUG08799-G08		S	A	Biodiversity Institute of Ontario	Collected June 20 - June 27, 2013.Very hot and sunny week, 24C on day of collection. Weekly min: 17C, max: 39C	museum voucher
CAM0521		S	A
BIOUG04041-A02		S	A	Thousand Islands NP	Collected from September 14 to 19 2012	museum voucher
BIOUG03979-A07		S	A	Thousand Islands NP	Collected from August 17 to 27 2012|Was collected on Mon. instead of Fri.	museum voucher
BIOUG03979-B04		S	A	Thousand Islands NP	Collected from August 17 to 27 2012|Was collected on Mon. instead of Fri.	museum voucher
BIOUG00991-B03		S	A	Windy Bluff
CAM0166		S	A
CAM0103		S	A
BIOUG07898-C04		S	A	Rouge National Urban Park	5 min sweep	museum voucher
BIOUG09931-A07		S	A	Biodiversity Institute of Ontario	Collected Sept 30 - Oct 4, sunny week, min temp: 7C, max temp: 39C	museum voucher
BIOUG12977-D11			A	La Mauricie National Park	Collected from 24 Jul 2013 - 1 Aug 2013: 2 malaise traps combined (+GMP#01037): spider closed entrance: approx. 15% of catch lost	museum voucher
BIOUG08641-G07		S	A	Guelph, John F. Ross C.V.I.	Collected from 23-Sept-13 to 27-Sept-206	museum voucher
CNCHYM 00107		S	A		N.C.D.A.
CAM0938		S	A
CAM0348		S	A
BIOUG08647-G07		S	A	St. Marys, Little Falls Public School	Collected from 23-Sept-13 to 27-Sept-190	museum voucher
BIOUG03979-B03		S	A	Thousand Islands NP	Collected from August 17 to 27 2012|Was collected on Mon. instead of Fri.	museum voucher
CAM0346		S	A
BIOUG01795-D07		S	A	Scheck Nature Reserve	Collected Sept 21-Oct 5 2011	museum voucher
BIOUG11996-F03		S	A	Pukaskwa National Park	Collected from 2 Sep 2013 - 9 Sep 2013: 2 malaise traps combined (+GMP#01515)	museum voucher
BIOUG11597-E04		S	A	Kejimkujik National Park	Collected from 5 Jul 2013 - 11 Jul 2013: 2 malaise traps combined (+GMP#01271)	museum voucher
CAM0445		S	A
BIOUG07903-F12		S	A	Rouge National Urban Park	Malaise trap	museum voucher
CAM0527		S	A
BIOUG01657-C11		S	A	North Bear	Collected Sept 20-Oct 6 2011
09BBEHY-2030		S	A	Kouchibouguac NP
BIOUG09770-A04		S	A	Rouge National Urban Park	Malaise 3-Sep-13 to 14-Sep-13: 2 traps combined (+GMP#01075)	museum voucher
CAM0531		S	A
CAM0007		S	A
BIOUG12487-D03				Mingan Archipelago National Park Reserve	Collected from 30 Jul 2013 - 6 Aug 2013: B	museum voucher
MIC 000086	F	S	A
ASGLE-0880		S	A	25 Division St.
BIOUG03887-F12		S	A	Thousand Islands NP	Collected from August 31 to September 7 2012	museum voucher
BIOUG08665-D12		S	A	Paris, Holy Family School	Collected from 23-Sept-13 to 27-Sept-175	museum voucher
BIOUG09515-E11		S	A	Biodiversity Institute of Ontario	Collected Aug 15-22, 2013. Hot, sunny week. Weekly min: 9C max: 40C	museum voucher
CAM0022		S	A
CAM0446		S	A
BIOUG01631-A09		S	A
CAM0635		S	A
CAM0335		S	A
GOU 0570		S	A
BIOUG07902-D08		S	A	Rouge National Urban Park	Malaise trap	museum voucher
HYM00001026		S	A
CAM0523		S	A
CAM0356		S	A
CNCH1358		S	A
MIC 000083	M	S	A
BIOUG12977-D01			A	La Mauricie National Park	Collected from 24 Jul 2013 - 1 Aug 2013: 2 malaise traps combined (+GMP#01037): spider closed entrance: approx. 15% of catch lost	museum voucher
BIOUG11331-F04			A	Georgian Bay Islands National Park	Collected from 06 Aug 2013 - 19 Aug 2013: 2 malaise traps combined (+GMP#01543)	museum voucher
BIOUG03863-G08		S	A	Thousand Islands NP	Collected from August 17 to 27 2012|Was collected on Mon. instead of Fri.	museum voucher
BIOUG09765-B03		S	A	Rouge National Urban Park	Malaise 20-Aug-13 to 27-Aug-13: 2 traps combined (+GMP#01071)	museum voucher
CAM0410		S	A
CAM0113		S	A
WMIC 0517		S	A
BIOUG11999-F03		S	A	Pukaskwa National Park	Collected from 2 Sep 2013 - 9 Sep 2013: 2 malaise traps combined (+GMP#01515)	museum voucher
BIOUG00726-B07		S	A		sweep net grasses and willows sweep net ethanol
CAM0151		S	A
CAM0524		S	A
BIOUG03123-B05		S	A	Thousand Islands NP	Collected from June 22-29 2012
CAM0013		S	A
MIC 000082	M	S	A
BIOUG14171-B01				Pukaskwa National Park	Collected from 26 Aug 2013 - 2 Sep 2013: 2 malaise traps combined (+GMP#01513)	museum voucher
CAM0942		S	A
BIOUG09803-F06		S	A	Biodiversity Institute of Ontario	Collected Sep 12-19, 2013. Mixed temperatures. Weekly min: 3C max: 36C	museum voucher
BIOUG07004-C04		S	A	Thousand Islands NP	Collected from July 13 to 20 2012	museum voucher
CAM0529		S	A
CAM0074		S	A
BIOUG06823-E08		S	A	Thousand Islands NP	Collected from August 10 to 17 2012	museum voucher
BIOUG08665-A11		S	A	Paris, Holy Family School	Collected from 23-Sept-13 to 27-Sept-237	museum voucher
BIOUG01631-G11		S	A		Sep 9-20, 2011
BIOUG12974-A03			A	La Mauricie National Park	Collected from 24 Jul 2013 - 1 Aug 2013: 2 malaise traps combined (+GMP#01037): spider closed entrance: approx. 15% of catch lost	museum voucher
CAM0447		S	A
BIOUG01597-F04		S	A		Aug 14-23, 2011	museum voucher
BIOUG08647-D01		S	A	St. Marys, Little Falls Public School	Collected from 23-Sept-13 to 27-Sept-232	museum voucher
BIOUG01657-F02		S	A	North Bear	Collected Sept 20-Oct 6 2011
BIOUG09765-A12		S	A	Rouge National Urban Park	Malaise 20-Aug-13 to 27-Aug-13: 2 traps combined (+GMP#01071)	museum voucher
BIOUG03979-H08		S	A	Thousand Islands NP	Collected from August 31 to September 7 2012	museum voucher
CAM0350		S	A
BIOUG03931-F01		S	A	Point Pelee NP	Collected from September 5 to 12 2012	museum voucher
BIOUG09930-G10		S	A	Biodiversity Institute of Ontario	Collected Sept 30 - Oct 4, sunny week, min temp: 7C, max temp: 39C	museum voucher
BIOUG08648-H10		S	A	St. Marys, Little Falls Public School	Collected from 23-Sept-13 to 27-Sept-277	museum voucher
BIOUG08752-A08		S	A	Rouge National Urban Park	Malaise 27-Aug-13 to 3-Sep-13: 2 traps combined (+GMP#01073)	museum voucher
BIOUG12497-F12				Mingan Archipelago National Park Reserve	Collected from 30 Jul 2013 - 6 Aug 2013: A	museum voucher
BIOUG08665-F02		S	A	Paris, Holy Family School	Collected from 23-Sept-13 to 27-Sept-189	museum voucher
BIOUG09930-E06		S	A	Biodiversity Institute of Ontario	Collected Sept 30 - Oct 4, sunny week, min temp: 7C, max temp: 39C	museum voucher
CAM0120		S	A
BIOUG01661-E11		S	A	North Bear	Collected Sept 20-Oct 6 2011
BIOUG09765-A06		S	A	Rouge National Urban Park	Malaise 20-Aug-13 to 27-Aug-13: 2 traps combined (+GMP#01071)	museum voucher
CAM0389		S	A
HYM00001020		S	A
CAM0286		S	A
CAM0163		S	A
CAM0351		S	A
TDWG-0384		S	A		Freehand Sampling 10TDWG-0019
CAM0413		S	A
BIOUG06823-D07		S	A	Thousand Islands NP	Collected from August 10 to 17 2012	museum voucher
CNCHYM 00106		S	A
BIOUG08499-C11		S	A	Teeswater, Sacred Heart School	Collected from 23-Sept-13 to 27-Sept-270	museum voucher
CAM0360		S	A
CAM0349		S	A
CAM0115		S	A
MIC 000085	F	S	A
BIOUG03979-G06		S	A	Thousand Islands NP	Collected from August 31 to September 7 2012	museum voucher
CAM0964		S	A
CAM0025		S	A
MIC 000088	F	S	A
BIOUG08807-A09		S	A	Biodiversity Institute of Ontario	Collected June 20 - June 27, 2013.Very hot and sunny week, 24C on day of collection. Weekly min: 17C, max: 39C	museum voucher
CAM0101		S	A
BIOUG09925-F01		S	A	Biodiversity Institute of Ontario	Collected Sept 23-27, min temp: 4C, max temp: 40C	museum voucher
BIOUG09345-D07		S	A	Biodiversity Institute of Ontario	Collected Aug 1-8, 2013. Mostly sunny with some rain, 23C on day of collection. Weekly min: 9C max: 33C	museum voucher
BIOUG09925-A01		S	A	Biodiversity Institute of Ontario	Collected Sept 23-27, min temp: 4C, max temp: 40C	museum voucher
BIOUG14261-G11			A	La Mauricie National Park	Collected from 17 Jul 2013 - 24 Jul 2013: 2 malaise traps combined (+GMP#01035)	museum voucher
CAM0062		S	A
BIOUG08665-D10		S	A	Paris, Holy Family School	Collected from 23-Sept-13 to 27-Sept-173	museum voucher
CAM0076		S	A
BIOUG11771-G09		S	A	Pukaskwa National Park	Collected from 19 Aug 2013 - 26 Aug 2013: 2 malaise traps combined (+GMP#01511)	museum voucher
BIOUG09807-D05		S	A	Biodiversity Institute of Ontario	Collected Sep 12-19, 2013. Mixed temperatures. Weekly min: 3C max: 36C	museum voucher
CAM0530		S	A
HYM00001021		S	A
CAM0528		S	A
10BBCHY-1304		S	A	Prince Albert NP
CNCH1025		S	A
CAM0399		S	A
BIOUG07902-D06		S	A	Rouge National Urban Park	Malaise trap	museum voucher
MIC 000089	F	S	A
BIOUG01631-A05		S	A
CAM0941		S	A
CAM0961		S	A
BIOUG10641-G12		S	A	Georgian Bay Islands National Park	Collected from 12 May 2013 - 23 May 2013: 2 malaise traps combined (+GMP#01527)	museum voucher
BIOUG09631-C02		S	A	Biodiversity Institute of Ontario	Collected Aug 15-22, 2013. Hot, sunny week. Weekly min: 9C max: 40C	museum voucher
BIOUG14099-G10				Pukaskwa National Park	Collected from 26 Aug 2013 - 2 Sep 2013: 2 malaise traps combined (+GMP#01513)	museum voucher
BIOUG11758-F08		S	A	Kejimkujik National Park	Collected from 18 Jul 2013 - 25 Jul 2013: 2 malaise traps combined (+GMP#01277)	museum voucher
10BBCHY-1305		S	A	Prince Albert NP
CAM0522		S	A
CAM0347		S	A
CNCHYM 00105		S	A
BIOUG14170-E05				Pukaskwa National Park	Collected from 26 Aug 2013 - 2 Sep 2013: 2 malaise traps combined (+GMP#01513)	museum voucher
CAM0054		S	A
HYM00000665		S	A
BIOUG08749-G01		S	A	Rouge National Urban Park	Malaise 27-Aug-13 to 3-Sep-13: 2 traps combined (+GMP#01073)	museum voucher
TDWG-0167		S	A		Mecury Vapour Light Trap Clear Sky
07PROBE-23393		S	A		<VERBATIM LOCALITY>|Ramsay Creek|58.754|-93.949|</VERBATIM LOCALITY>
BIOUG07902-D03		S	A	Rouge National Urban Park	Malaise trap	museum voucher
CAM0099		S	A
BIOUG08565-E09		S	A	Perth East, Mornington Central School	Collected from 23-Sept-13 to 27-Sept-250	museum voucher
MIC 000666		S	A
CAM0146		S	A
BIOUG09801-C03		S	A	Biodiversity Institute of Ontario	Collected Aug 29- Sep 05, 2013. Sunny, but cooler week. Weekly min: 10C max: 36C	museum voucher
MIC 000488		S	A
BIOUG01572-D01		S	A	Prairie Smoke	Collected Sept 20-Oct 6 2011
HYM00001025		S	A
CAM0072		S	A
CAM0024		S	A
BIOUG11726-F01		S	A	Georgian Bay Islands National Park	Collected from 06 Aug 2013 - 19 Aug 2013: 2 malaise traps combined (+GMP#01543)	museum voucher
BIOUG12460-D06				Mingan Archipelago National Park Reserve	Collected from 30 Jul 2013 - 6 Aug 2013: B	museum voucher
BIOUG09930-G04		S	A	Biodiversity Institute of Ontario	Collected Sept 30 - Oct 4, sunny week, min temp: 7C, max temp: 39C	museum voucher
BIOUG03863-E06		S	A	Thousand Islands NP	Collected from August 3 to 10 2012	museum voucher
CAM0039		S	A
CAM0409		S	A
CBRA0492		S	A
CBRA0493	F	S	A	Host: Ennomos subsignaria
CNCHYM 00215		S	A	Archips podana
CBRA0491		S	A
MIC 000009	F	S	A
CBRA0490		S	A
MIC 000007	F	S	A
MIC 000013	F	S	A
MIC 000010	F	S	A
MIC 000011	F	S	A
MIC 000014	M	S	A
MIC 000005	F	S	A
CBRA0495	F	S	A	Host: Ennomos subsignaria
CBRA0494	F	S	A	Host: Ennomos subsignaria
MIC 000012	M	S	A
MIC 000006	M	S	A
MIC 000008	M	S	A
BIOUG10637-H02		S	A	Gros Morne National Park	Collected from 3 Sep 2013 - 17 Sep 2013: 2 malaise traps combined (+GMP#01157): 2 week collection	museum voucher
07PROBE-22321		S	A		<VERBATIM LOCALITY>|Pumphouse|58.373|-94.134|</VERBATIM LOCALITY>
BIOUG04486-G10		S	A	Prince Albert NP	Collected from July 10 to 12 2012|bear fence added around trap
MIC 000638		S	A
07PROBE-20921		S	A		<VERBATIM LOCALITY>|Pumphouse|58.373|-94.134|</VERBATIM LOCALITY>
CNCHYM 00401		S	A
BIOUG08665-E05				Paris, Holy Family School	Collected from 23-Sept-13 to 27-Sept-180	museum voucher
BIOUG01258-H06			A		August 14-17 2010
CAM0542		S	A
BIOUG08742-H10			A	Biodiversity Institute of Ontario	Collected June 20 - June 27, 2013.Very hot and sunny week, 24C on day of collection. Weekly min: 17C, max: 39C	museum voucher
CNCHYM 00404		S	A		Rutgers University, 134
CNCHYM 00403		S	A
CNCHYM 00402		S	A
CAM1034		S	A
BIOUG03438-B06		S	A	Point Pelee NP	Collected from June 13 to 20 2012	museum voucher
CAM0893		S	A
BIOUG03445-F01		S	A	Point Pelee NP	Collected from June 27 to July 4 2012	museum voucher
CNCHYM 01091		S	A	Host: Swammerdamia beinnei
CNCHYM 01093		S	A	S. ocellana
CNCHYM 01089		S	A
CNCHYM 00216		S	A	H. pariana
CNCHYM 01363		S	A		Code 74574
CNCHYM 01366		S	A
CNCHYM 01375		S	A
GOU 0314		S	A
CNCHYM 01365		S	A
CAM0473		S	A
CNCHYM 01369		S	A
CAM0470		S	A
CAM0471		S	A
CAM0468		S	A
CNCHYM 01370		S	A
CAM0463		S	A
CAM0465		S	A
CAM0464		S	A
CNCHYM 01368		S	A
CNCHYM 01367		S	A		2-113I
CAM0462		S	A
CNCHYM 01371		S	A
CAM0469		S	A
CNCHYM 01376		S	A
CNCHYM 01364		S	A
CNCHYM 01377		S	A
CNCHYM 01378		S	A
BIOUG01082-E12		S	A		July 16-18 2010
CAM0474		S	A
CAM0466		S	A
CAM0472		S	A
CAM0467		S	A
CAM0278		S	A
BIOUG04442-A12		S	A	Banff NP		museum voucher
HYM00000958		S	A		HYM000516
CNCH3205		S	A
HYM00000818		S	A
CNCH3212		S	A
BIOUG07357-A10		S	A		collected July 4 - July 11, 2013	museum voucher
HYM00000994		S	A		HYM000552
HYM00000974		S	A		HYM000532
HYM00000953		S	A		HYM000511
HYM00000821.2		S	A		<VERBATIM LOCALITY>|Churchill|||</VERBATIM LOCALITY>
CNCHYM 03136		S	A	Ex. Bucculatrix sp.	#68 S63-5153-01-2
HYM00000821		S	A
HYM00000941		S	A		HYM000499
CNCH3209		S	A
CNCH3215		S	A
CNCHYM 03143		S	A	Ex. Leucoptera pachystemella	58-5080-01-i
HYM00000996		S	A		HYM000554
CNCH0955		S	A
HYM00000948		S	A		HYM000506
CNCH3208		S	A
HYM00000986		S	A		HYM000544
HYM00000820		S	A
HYM00000971		S	A		HYM000529
HYM00000955		S	A		HYM000513
CNCH3306		S	A
HYM00000972		S	A		HYM000530
HYM00000947		S	A		HYM000505
CNCH3310		S	A
HYM00000931		S	A		HYM000489
HYM00000985		S	A		HYM000543
CNCH3203		S	A
CNCHYM 03141		S	A
CNCH0995		S	A
HYM00000331		S	A
HYM00000939		S	A		HYM000497
HYM00000969		S	A		HYM000527
CNCH0993		S	A
CNCHYM 03145		S	A
HYM00000819		S	A
CNCHYM 03138		S	A	Gracillaria invariabilis	No. 62-330-028
CNCH3204		S	A
CNCH3213		S	A
BIOUG00989-E07		S	A	Windy Bluff
BIOUG03931-A10		S	A	Point Pelee NP	Collected from September 5 to 12 2012	museum voucher
CNCH0965		S	A
HYM00001322		S	A
CAM0437		S	A
HYM00000990		S	A		HYM000548
CNCHYM 03139		S	A	Ex. Gracillaria fraxinella	862-4551-01-01, #28
HYM00000975		S	A		HYM000533
CNCH3206		S	A
HYM00000935		S	A		HYM000493
CNCH1008		S	A
HYM00000987		S	A		HYM000545
CNCH0987		S	A
08BBHYM-1368		S	A	Grasslands NP
HYM00000968		S	A		HYM000526
CNCHYM 03144		S	A	Rd-Larv-Sweet potato leaf miner	No.456142 SS 24194
HYM00000936		S	A		HYM000494
HYM00000951		S	A		HYM000509
HYM00001320		S	A
HYM00000920		S	A
CNCHYM 03137		S	A	Ex.Micuvapteryx sp. on Salix sp.	715-1434-01-10
HYM00000820.2		S	A		<VERBATIM LOCALITY>|Mile 505, Hudson Bay Rwy.|||</VERBATIM LOCALITY>
HYM00000976		S	A		HYM000534
HYM00000943		S	A		HYM000501
HYM00000934		S	A		HYM000492
HYM00000938		S	A		HYM000496
HYM00000950		S	A		HYM000508
HYM00000956		S	A		HYM000514
HYM00000973		S	A		HYM000531
HYM00000970		S	A		HYM000528
HYM00000940		S	A		HYM000498
CNCHYM 03142		S	A
HYM00000942		S	A		HYM000500
CNCHYM 03140		S	A
07PROBE-20072		S	A		PLT-0034 G11<VERBATIM LOCALITY>|Twin Lakes 22 km SE Churchill|58.632|-93.788|</VERBATIM LOCALITY>
CNCHYM 03217		S	A
HYM00000806		S	A
07PROBE-22423		S	A		<VERBATIM LOCALITY>|Ramsay Creek|58.754|-93.949|</VERBATIM LOCALITY>
BIOUG14184-G04				Gros Morne NP	2 malaise traps | overcast and cool at time of collection | 10 July - 20 July 2013	museum voucher
HYM00000809.2		S	A
10PROBE-29276		S	A		sweep net on hill and base of hill sweep net ethanol
HYM00000798		S	A
CAM0958		S	A
HYM00000981		S	A		HYM000539
BIOUG03191-A01				Elk Island NP	Collected from June 8 to 15 2012	museum voucher
HYM00000792.2		S	A
CAM0427		S	A
HYM00000795		S	A
HYM00000813		S	A
GOU 0582		S	A
07PROBE-23399					<VERBATIM LOCALITY>|Ramsay Creek|58.754|-93.949|</VERBATIM LOCALITY>
HYM00000922		S	A
CAM0412		S	A
07PROBE-23413		S	A		<VERBATIM LOCALITY>|Ramsay Creek|58.754|-93.949|</VERBATIM LOCALITY>
10BBCHY-2887		S	A	Yoho NP	Collected from July 21-24	Specimen in 95% Ethanol
CAM0422		S	A
HYM00000945		S	A		HYM000503
HYM00000814.2		S	A		<VERBATIM LOCALITY>|Fort Churchill|||</VERBATIM LOCALITY>
CAM0435		S	A
HYM00000801		S	A
CAM0959		S	A
HYM00000964		S	A		HYM000522
HYM00000794		S	A
07PROBE-22417					<VERBATIM LOCALITY>|Ramsay Creek|58.754|-93.949|</VERBATIM LOCALITY>
GOU 0590		S	A
CAM0936		S	A
07PROBE-20806		S	A		<VERBATIM LOCALITY>|Ramsay Creek|58.754|-93.949|</VERBATIM LOCALITY>
CAM0434		S	A
CAM0948		S	A
HYM00000802		S	A
HYM00001682		S	A
CAM0421		S	A
CAM0416		S	A
HYM00000815		S	A
CAM0428		S	A
HYM00000816		S	A
07PROBE-20818		S	A		<VERBATIM LOCALITY>|Ramsay Creek|58.754|-93.949|</VERBATIM LOCALITY>
CAM0386		S	A
CAM0387		S	A
CAM0944		S	A
CNCHYM 03216		S	A
CAM0952		S	A
HYM00000815.2		S	A		<VERBATIM LOCALITY>|Fort Churchill|||</VERBATIM LOCALITY>
CAM0426		S	A
10PROBE-28643		S	A		sweep net grasses and willows beside bridge sweep net ethanol
HYM00000811.2		S	A		<VERBATIM LOCALITY>|Fort Churchill|||</VERBATIM LOCALITY>
CAM0492		S	A
CAM0945		S	A
HYM00000603		S	A
CAM0951		S	A
HYM00000989		S	A		HYM000547
MIC 000900		S	A
07PROBE-20808		S	A		<VERBATIM LOCALITY>|Ramsay Creek|58.754|-93.949|</VERBATIM LOCALITY>
CAM0365		S	A
CAM0384		S	A
CAM0431		S	A
CNCHYM 03218		S	A
MIC 000721		S	A
HYM00000803		S	A
GOU 0589		S	A
HYM00000813.2		S	A		<VERBATIM LOCALITY>|Fort Churchill|||</VERBATIM LOCALITY>
CAM0488		S	A
HYM00000792		S	A
HYM00000932		S	A		HYM000490
BIOUG05353-G06				Waterton Lakes NP		museum voucher
HYM00001312		S	A
MIC 000350		S	A
HYM00000982		S	A		HYM000540
10BBCHY-2879		S	A	Yoho NP	Collected from July 21-24	Specimen in 95% Ethanol
09BBEHY-1128		S	A	Gros Morne NP	|http://www.gigapan.org/viewGigapan.php?id=29255
HYM00000944		S	A		HYM000502
HYM00001329		S	A
09PROBE-A0342		S	A		malaise trap malaise trap
HYM00000804		S	A
07PROBE-24572		S	A
CAM0415		S	A
MIC 000723		S	A
HYM00000793.2		S	A		<VERBATIM LOCALITY>|Fort Churchill|||</VERBATIM LOCALITY>
HYM00000812		S	A
HYM00000796		S	A
HYM00000797		S	A
CAM0417		S	A
07PROBE-20789		S	A		<VERBATIM LOCALITY>|Ramsay Creek|58.754|-93.949|</VERBATIM LOCALITY>
GOU 0588		S	A
CAM0403		S	A
MIC 000722		S	A
CAM0419		S	A
CAM0414		S	A
BIOUG03882-B11		S	A	Riding Mountain NP	Collected from July 16 to 23 2012	museum voucher
HYM00000810		S	A
BIOUG07032-G03		S		Thousand Islands NP	Collected from June 29 to July 7 2012	museum voucher
CAM0430		S	A
HYM00000800		S	A
CAM0418		S	A
MIC 000923		S	A
CAM0383		S	A
HYM00000793		S	A
HYM00000808		S	A
HYM00000962		S	A		HYM000520
HYM00000814		S	A
CAM0953		S	A
HYM00000604		S	A
CAM0429		S	A
CAM0382		S	A
CAM0385		S	A
08BBHYM-1493		S	A	Banff NP
CAM0438		S	A
CAM0423		S	A
BIOUG03593-B08		S	A	Riding Mountain NP	Collected from July 2 to 9 2012	museum voucher
HYM00000767		S	A
HYM00000817		S	A
HYM00000805		S	A
HYM00000809		S	A
HYM00000811		S	A
CAM0432		S	A
HYM00000921		S	A
MIC 000909		S	A
CAM0957		S	A
CAM0955		S	A
HYM00000799		S	A
HYM00000921.2		S	A
HYM00000807		S	A

## Sheet: CollectionData
Project:	SEARCH: Sample ids(633 ids), Include public records			User :	Jose Leonardo Fernandez Triana
Created :	24-September-2014
Sample ID	Collectors	Collection Date	Country/Ocean	State/Province	Region	Sector	Exact Site	Lat	Lon	Elev	Depth	Elevation Precision	Depth Precision	GPS Source	Coordinate Accuracy	Event Time	Collection Date Accuracy	Habitat	Sampling Protocol	Collection Notes	Site Code	Collection Event ID
CAM0023	H. Goulet	19-Sep-2007	Canada	Ontario	Ottawa		Ottawa city garden	45.356	-75.707
BIOUG01088-A03	James Sones	17-Jul-2010	Canada	Ontario	Leeds and Grenville	Elizabethtown-Kitley	4452 Rowsome Rd., Elizabethtown	44.621	-75.773	112				Google Earth	5		1	Temperate mixed forest	Malaise trap		BIOUG:Elizabethtown	July 16-18 2010
CAM0036	H. Goulet	10-Aug-2007	Canada	Ontario	Ottawa		Ottawa city garden	45.356	-75.707
MIC 000034	Dom. Par. Lab.	18-Jul-1947	Canada	Ontario	Essex County		Ruthven
MIC 000041	N. C. D. A	02-Jun-1976	United States	North Carolina	Bertie County		near Cahaba
MIC 000036	Phillips	17-Aug-1974	Canada	Ontario			Vineland
BIOUG01631-B09	James Sones	18-Aug-2011	Canada	Ontario	Leeds and Grenville	Elizabethtown-Kitley	4452 Rowsome Rd., Elizabethtown	44.618	-75.775	111				Google Earth	5		5	Temperate mixed forest	Malaise trap		BIOUG:Elizabethtown	Aug 14-23, 2011
CAM0104	H. Goulet	08-Sep-2007	Canada	Ontario	Ottawa		Ottawa city garden	45.356	-75.707
MIC 000035	J. Vockeroth	15-Sep-1955	Canada	Ontario	Ottawa		Ottawa
CNCHYM 00081	N. C. D. A	02-Jun-1976	United States	North Carolina	Bertie County		near Cahaba
CAM0117	H. Goulet	30-Jul-2007	Canada	Ontario	Ottawa		Ottawa city garden	45.356	-75.707
CAM0021	H. Goulet	13-Jul-2007	Canada	Ontario	Ottawa		Ottawa city garden	45.356	-75.707
CAM0046	H. Goulet	23-Jul-2007	Canada	Ontario	Ottawa		Ottawa city garden	45.356	-75.707
MIC 000040	N. C. D. A	02-Jun-1976	United States	North Carolina	Bertie County		near Cahaba
CAM0053	H. Goulet	23-Jul-2007	Canada	Ontario	Ottawa		Ottawa city garden	45.356	-75.707
CAM0063	H. Goulet	13-Jul-2007	Canada	Ontario	Ottawa		Ottawa city garden	45.356	-75.707
CAM0020	H. Goulet	13-Jul-2007	Canada	Ontario	Ottawa		Ottawa city garden	45.356	-75.707
CAM0058	H. Goulet	13-Jul-2007	Canada	Ontario	Ottawa		Ottawa city garden	45.356	-75.707
CAM0026	H. Goulet	30-Jul-2007	Canada	Ontario	Ottawa		Ottawa city garden	45.356	-75.707
CAM0049	H. Goulet	23-Jul-2007	Canada	Ontario	Ottawa		Ottawa city garden	45.356	-75.707
MIC 000037	D. Finnamore	21-Oct-1981	Canada	New Brunswick	York County
MIC 000033	C. Twinn	08-May-1928	Canada	Ontario	Ottawa		Ottawa
MIC 000038		15-Jul-1978	Canada	British Columbia			Aldergrove, on a poultry barn
CAM0042	H. Goulet	10-Aug-2007	Canada	Ontario	Ottawa		Ottawa city garden	45.356	-75.707
CNCHYM 00088	N. C. D. A	14-Jul-1976	United States	North Carolina	Orange County		Chapel Hill
MIC 000908	H. Goulet, A. Badiss, C. Boudeault	18-Jul-2008	Canada	Newfoundland and Labrador			St-Andrew`s	47.793	-59.233
BIOUG10353-H05	F.Tremblay	18-Jul-2013	Canada	Quebec	Forillon National Park	trail off of park compound (i.e. operation centre), 1501 boul. Forillon	mixed forest (spruce, poplar)	48.857	-64.376	135				GPS			3		Malaise Trap		BIOUG:FORILLON-NP
MIC 000905	H. Goulet, A. Badiss, C. Boudeault	18-Jul-2008	Canada	Newfoundland and Labrador			St-Andrew`s	47.793	-59.233
BIOUG00989-E12	Alex Smith	19-Sep-2010	Canada	Ontario	Haldimond-Dunn Townline	Windy Bluff		42.861	-79.703	179				GPS
BIOUG01252-E11	James Sones	03-Aug-2010	Canada	Ontario	Leeds and Grenville	Elizabethtown-Kitley	4452 Rowsome Rd., Elizabethtown	44.621	-75.773	112				Google Earth	5		1	Temperate mixed forest	Malaise trap		BIOUG:Elizabethtown	August 2-4 2010
BIOUG07019-B11	Cyndi Smith	19-Jul-2012	Canada	Alberta	Waterton Lakes NP	Foothills Parkland Region		49.083	-113.876	1338				GPS			4	Forest	Malaise Trap	Malaise Trap||Aspen forest	BIOUG:WATERTON-NP:4
BIOUG10403-A09	F.Tremblay	22-Jul-2013	Canada	Quebec	Forillon National Park	trail off of park compound (i.e. operation centre), 1501 boul. Forillon	mixed forest (spruce, poplar)	48.857	-64.376	135				GPS			3		Malaise Trap		BIOUG:FORILLON-NP
MIC 000063		15-Aug-1945	United States	Kansas			Manhattan
BIOUG10360-E02	F.Tremblay	18-Jul-2013	Canada	Quebec	Forillon National Park	trail off of park compound (i.e. operation centre), 1501 boul. Forillon	mixed forest (spruce, poplar)	48.857	-64.376	135				GPS					Malaise Trap		BIOUG:FORILLON-NP
BIOUG10358-C12	F.Tremblay	18-Jul-2013	Canada	Quebec	Forillon National Park	trail off of park compound (i.e. operation centre), 1501 boul. Forillon	mixed forest (spruce, poplar)	48.857	-64.376	135				GPS					Malaise Trap		BIOUG:FORILLON-NP
BIOUG00989-F01	Alex Smith	19-Sep-2010	Canada	Ontario	Haldimond-Dunn Townline	Windy Bluff		42.861	-79.703	179				GPS
BIOUG11905-C04	F.Tremblay	15-Jul-2013	Canada	Quebec	Forillon National Park	trail off of park compound (i.e. operation centre), 1501 boul. Forillon	mixed forest (spruce, poplar)	48.857	-64.376	135				GPS
MIC 000902	H. Goulet, A. Badiss, C. Boudeault	11-Jul-2008	Canada	Newfoundland and Labrador			Cap St-George, fallow field	48.466	-59.26
MIC 000058	J. McDunnough	15-Aug-1935	Canada	Nova Scotia	Queens County		White Pt. Beach
CAM0096	L. Masner	05-Oct-2007	Canada	Ontario	Ottawa		Ottawa city, Slack Road
BIOUG11907-E10	F.Tremblay	15-Jul-2013	Canada	Quebec	Forillon National Park	trail off of park compound (i.e. operation centre), 1501 boul. Forillon	mixed forest (spruce, poplar)	48.857	-64.376	135				GPS
CAM1013	H. Goulet		Canada	Ontario	Ottawa		Ottwa city garden	45.356	-75.707
BIOUG01631-H02	James Sones	14-Sep-2011	Canada	Ontario	Leeds and Grenville	Elizabethtown-Kitley	4452 Rowsome Rd., Elizabethtown	44.618	-75.775	111				Google Earth	5		6	Temperate mixed forest	Malaise trap		BIOUG:Elizabethtown	Sep 9-20, 2011
CNCHYM 00089	N. C. D. A	04-Oct-1976	United States	North Carolina	Davie County		near Mocksvile
BIOUG04245-B10	Jarret Hardisty	26-Jul-2012	Canada	Alberta	Waterton Lakes NP	Foothills Parkland Region		49.083	-113.876	1338				GPS			4	Forest	Malaise Trap	Malaise Trap||Aspen forest	BIOUG:WATERTON-NP:4
BIOUG00989-E09	Alex Smith	19-Sep-2010	Canada	Ontario	Haldimond-Dunn Townline	Windy Bluff		42.861	-79.703	179				GPS
BIOUG11904-F02	F.Tremblay	15-Jul-2013	Canada	Quebec	Forillon National Park	trail off of park compound (i.e. operation centre), 1501 boul. Forillon	mixed forest (spruce, poplar)	48.857	-64.376	135				GPS
10BBCHY-2243	BIObus 2010	14-Aug-2010	Canada	Saskatchewan	Prince Albert NP	Red Deer Trl. Red Loop		53.907	-106.075	578							2	Grassland	Malaise Trap	Malaise Trap||Grassy hills
MIC 000600	L. Masner	06-Aug-2008	Canada	Ontario			Woodlawn
PCPP10-0759	T.F.Mitterboeck, C.Vandermeer, V.Junea, C.Sobel	28-Jun-2010	Canada	Ontario	Point Pelee NP	15km SE of Leamington	DeLaurier Marsh and Thicket Trail	41.949	-82.521	181				GPS WGS84				Wetland	Sweep Net	Sweep Net||Buttonbush Mineral Deciduous Swamp
BIOUG11909-G05	F.Tremblay	15-Jul-2013	Canada	Quebec	Forillon National Park	trail off of park compound (i.e. operation centre), 1501 boul. Forillon	mixed forest (spruce, poplar)	48.857	-64.376	135				GPS
BIOUG00991-A05	Alex Smith	23-Oct-2010	Canada	Ontario	Haldimond-Dunn Townline	Windy Bluff		42.861	-79.703	179				GPS
BIOUG00914-E04	Alex Smith	21-Nov-2010	Canada	Ontario	Haldimond-Dunn Townline	Windy Bluff		42.861	-79.703	179				GPS
BIOUG00914-E03	Alex Smith	21-Nov-2010	Canada	Ontario	Haldimond-Dunn Townline	Windy Bluff		42.861	-79.703	179				GPS
BIOUG10961-E03	Paul Ayles	17-Jul-2013	Canada	Prince Edward Island	Prince Edward Island National Park	Woodland Trail / Long Point		46.412	-63.085	6				WGS84					Malaise trap		BIOUG:PEI-NP
BIOUG08661-F09	Amy Fennell	28-Sep-2013	Canada	Ontario	Campbellville	Mountsberg Conservation Area		43.457	-80.027	215				GPS					Malaise trap		BIOUG:SCHOOL-MTP
BIOUG07067-E03	Emma Sylvester	02-Aug-2012	Canada	Alberta	Waterton Lakes NP	Foothills Parkland Region		49.083	-113.876	1338				GPS			4	Forest	Malaise Trap	Malaise Trap||Aspen forest	BIOUG:WATERTON-NP:4
BIOUG01280-G04	James Sones	29-Aug-2010	Canada	Ontario	Leeds and Grenville	Elizabethtown-Kitley	4452 Rowsome Rd., Elizabethtown	44.621	-75.773	112				Google Earth	5		3	Temperate mixed forest	Malaise trap		BIOUG:Elizabethtown	August 27- September 1 2010
CAM0160	H. Goulet	01-Sep-2007	Canada	Ontario	Ottawa		Ottawa city garden	45.356	-75.707
BIOUG06873-E09	Cyndi Smith	19-Jul-2012	Canada	Alberta	Waterton Lakes NP	Foothills Parkland Region		49.083	-113.876	1338				GPS			4	Forest	Malaise Trap	Malaise Trap||Aspen forest	BIOUG:WATERTON-NP:4
BIOUG12293-G01	F.Tremblay	12-Aug-2013	Canada	Quebec	Forillon National Park	trail off of park compound (i.e. operation centre), 1501 boul. Forillon	mixed forest (spruce, poplar)	48.857	-64.376	135				GPS
BIOUG10408-B06	F.Tremblay	18-Jul-2013	Canada	Quebec	Forillon National Park	trail off of park compound (i.e. operation centre), 1501 boul. Forillon	mixed forest (spruce, poplar)	48.857	-64.376	135				GPS					Malaise Trap		BIOUG:FORILLON-NP
BIOUG00989-E11	Alex Smith	19-Sep-2010	Canada	Ontario	Haldimond-Dunn Townline	Windy Bluff		42.861	-79.703	179				GPS
BIOUG10358-E06	F.Tremblay	22-Jul-2013	Canada	Quebec	Forillon National Park	trail off of park compound (i.e. operation centre), 1501 boul. Forillon	mixed forest (spruce, poplar)	48.857	-64.376	135				GPS			3		Malaise Trap		BIOUG:FORILLON-NP
BIOUG00861-G06	Paul Hebert	15-Oct-2010	Canada	Ontario	Wellington County	Puslinch Township	Concession 11/Hume Rd	43.537	-80.134	320							4	Temperate mixed forest	Malaise trap		BIOUG:PDH-home	TRAP; Oct 11-19
BIOUG10550-D04	Dany Brodeau	05-Aug-2013	Canada	Quebec	Forillon National Park	trail off of park compound (i.e. operation centre), 1501 boul. Forillon	mixed forest (spruce, poplar)	48.857	-64.376	135				GPS					Malaise trap		BIOUG:FORILLON-NP
BIOUG02507-D09	Paul Hebert	08-Sep-2010	Canada	Ontario	Wellington County	Puslinch Township	Concession 11/Hume Rd	43.537	-80.134	320							4	Temperate mixed forest	Malaise trap		BIOUG:PDH-home	TRAP; Sep 5-12
BIOUG10403-A08	F.Tremblay	18-Jul-2013	Canada	Quebec	Forillon National Park	trail off of park compound (i.e. operation centre), 1501 boul. Forillon	mixed forest (spruce, poplar)	48.857	-64.376	135				GPS			3		Malaise Trap		BIOUG:FORILLON-NP
BIOUG00914-E07	Alex Smith	21-Nov-2010	Canada	Ontario	Haldimond-Dunn Townline	Windy Bluff		42.861	-79.703	179				GPS
CAM0147	H. Goulet	01-Sep-2007	Canada	Ontario	Ottawa		Ottawa city garden	45.356	-75.707
BIOUG00988-A09	Alex Smith	29-Oct-2010	Canada	Ontario	Guelph	25 Division St.		43.554	-80.264	326				GPS
BIOUG11910-C01	F.Tremblay	15-Jul-2013	Canada	Quebec	Forillon National Park	trail off of park compound (i.e. operation centre), 1501 boul. Forillon	mixed forest (spruce, poplar)	48.857	-64.376	135				GPS
BIOUG04245-A01	Jarret Hardisty	26-Jul-2012	Canada	Alberta	Waterton Lakes NP	Foothills Parkland Region		49.083	-113.876	1338				GPS			4	Forest	Malaise Trap	Malaise Trap||Aspen forest	BIOUG:WATERTON-NP:4
BIOUG00914-F08	Alex Smith	21-Nov-2010	Canada	Ontario	Haldimond-Dunn Townline	Windy Bluff		42.861	-79.703	179				GPS
BIOUG10661-F02	Dany Brodeau	05-Aug-2013	Canada	Quebec	Forillon National Park	trail off of park compound (i.e. operation centre), 1501 boul. Forillon	mixed forest (spruce, poplar)	48.857	-64.376	135				GPS					Malaise trap		BIOUG:FORILLON-NP
BIOUG11910-B12	F.Tremblay	15-Jul-2013	Canada	Quebec	Forillon National Park	trail off of park compound (i.e. operation centre), 1501 boul. Forillon	mixed forest (spruce, poplar)	48.857	-64.376	135				GPS
CNCHYM 00093		15-Aug-1945	United States	Kansas			Manhattan
CAM0005	H. Goulet	19-Sep-2007	Canada	Ontario	Ottawa		Ottawa city garden	45.356	-75.707
CAM0085	H. Goulet	10-Aug-2007	Canada	Ontario	Ottawa		Ottawa city garden	45.356	-75.707
BIOUG00989-A08	Alex Smith	29-Oct-2010	Canada	Ontario	Guelph	25 Division St.		43.554	-80.264	326				GPS
BIOUG08192-F10	BIOBus 2012	11-Jul-2012	Canada	Saskatchewan	Prince Albert NP	Spruce River Highlands Trail		53.712	-106.048	551				GPSmap 60Cx			2	Forest	Malaise Trap	2 Malaise Traps|Sunny, Hazy, 30 degrees celsius|Mixed wood forest, poplar/white spruce	BIOUG:PRINCEALB-NP:1
BIOUG01330-D09	James Sones	18-Oct-2010	Canada	Ontario	Leeds and Grenville	Elizabethtown-Kitley	4452 Rowsome Rd., Elizabethtown	44.621	-75.773	112				Google Earth	5		4	Temperate mixed forest	Malaise trap		BIOUG:Elizabethtown	October 14-22 2010
BIOUG10353-G01	F.Tremblay	18-Jul-2013	Canada	Quebec	Forillon National Park	trail off of park compound (i.e. operation centre), 1501 boul. Forillon	mixed forest (spruce, poplar)	48.857	-64.376	135				GPS			3		Malaise Trap		BIOUG:FORILLON-NP
BIOUG00914-G01	Alex Smith	21-Nov-2010	Canada	Ontario	Haldimond-Dunn Townline	Windy Bluff		42.861	-79.703	179				GPS
BIOUG07067-C07	Cyndi Smith	19-Jul-2012	Canada	Alberta	Waterton Lakes NP	Foothills Parkland Region		49.083	-113.876	1338				GPS			4	Forest	Malaise Trap	Malaise Trap||Aspen forest	BIOUG:WATERTON-NP:4
BIOUG12037-E03	F.Tremblay	30-Jul-2013	Canada	Quebec	Forillon National Park	trail off of park compound (i.e. operation centre), 1501 boul. Forillon	mixed forest (spruce, poplar)	48.857	-64.376	135				GPS
MIC 000061		02-Jul-1975	Canada	Ontario	St. Lawrence Islands National Park		Grenadier Island Center
BIOUG00989-E10	Alex Smith	19-Sep-2010	Canada	Ontario	Haldimond-Dunn Townline	Windy Bluff		42.861	-79.703	179				GPS
BIOUG10405-G04	F.Tremblay	22-Jul-2013	Canada	Quebec	Forillon National Park	trail off of park compound (i.e. operation centre), 1501 boul. Forillon	mixed forest (spruce, poplar)	48.857	-64.376	135				GPS			3		Malaise Trap		BIOUG:FORILLON-NP
MIC 000060		20-Jul-1972	Canada	Ontario	Aylmer		Aylmer West
CAM0159	H. Goulet	01-Sep-2007	Canada	Ontario	Ottawa		Ottawa city garden	45.356	-75.707
BIOUG13530-A05	BIObus 2013	07-Jun-2013	Canada	Ontario	Rouge National Urban Park	West of Glen Rouge campground	Marsh scrub along riverside	43.804	-79.146	80				GPS
BIOUG00914-F06	Alex Smith	21-Nov-2010	Canada	Ontario	Haldimond-Dunn Townline	Windy Bluff		42.861	-79.703	179				GPS
CNCHYM 03970	N. C. D. A	05-Oct-1976	United States	North Carolina	Avery County		Linville
BIOUG04245-C02	Jarret Hardisty	26-Jul-2012	Canada	Alberta	Waterton Lakes NP	Foothills Parkland Region		49.083	-113.876	1338				GPS			4	Forest	Malaise Trap	Malaise Trap||Aspen forest	BIOUG:WATERTON-NP:4
BIOUG00989-G12	Alex Smith	19-Sep-2010	Canada	Ontario	Haldimond-Dunn Townline	Windy Bluff		42.861	-79.703	179				GPS
BIOUG01309-D01	Paul Hebert	23-Sep-2010	Canada	Ontario	Wellington County	Puslinch Township	Concession 11/Hume Rd	43.537	-80.134	320							4	Temperate mixed forest	Malaise trap		BIOUG:PDH-home	TRAP; Sep 19-27
BIOUG00914-E08	Alex Smith	21-Nov-2010	Canada	Ontario	Haldimond-Dunn Townline	Windy Bluff		42.861	-79.703	179				GPS
BIOUG11908-H02	F.Tremblay	15-Jul-2013	Canada	Quebec	Forillon National Park	trail off of park compound (i.e. operation centre), 1501 boul. Forillon	mixed forest (spruce, poplar)	48.857	-64.376	135				GPS
BIOUG11903-A01	F.Tremblay	15-Jul-2013	Canada	Quebec	Forillon National Park	trail off of park compound (i.e. operation centre), 1501 boul. Forillon	mixed forest (spruce, poplar)	48.857	-64.376	135				GPS
BIOUG12293-B06	F.Tremblay	12-Aug-2013	Canada	Quebec	Forillon National Park	trail off of park compound (i.e. operation centre), 1501 boul. Forillon	mixed forest (spruce, poplar)	48.857	-64.376	135				GPS
BIOUG10405-C03	F.Tremblay	18-Jul-2013	Canada	Quebec	Forillon National Park	trail off of park compound (i.e. operation centre), 1501 boul. Forillon	mixed forest (spruce, poplar)	48.857	-64.376	135				GPS					Malaise Trap		BIOUG:FORILLON-NP
BIOUG06873-G07	Cyndi Smith	19-Jul-2012	Canada	Alberta	Waterton Lakes NP	Foothills Parkland Region		49.083	-113.876	1338				GPS			4	Forest	Malaise Trap	Malaise Trap||Aspen forest	BIOUG:WATERTON-NP:4
MIC 000059	J. McDunnough	15-Aug-1935	Canada	Nova Scotia	Queens County		White Pt. Beach
CNCHYM 00090	N. C. D. A	16-Jun-1975	United States	North Carolina	Martin County		near Williamston
MIC 000064		19-Jul-1976	Canada	Ontario	St. Lawrence Islands National Park		Thwartway Island
BIOUG11904-C07	F.Tremblay	15-Jul-2013	Canada	Quebec	Forillon National Park	trail off of park compound (i.e. operation centre), 1501 boul. Forillon	mixed forest (spruce, poplar)	48.857	-64.376	135				GPS
BIOUG00991-B06	Alex Smith	12-Sep-2010	Canada	Ontario	Haldimond-Dunn Townline	Windy Bluff		42.861	-79.703	179				GPS
BIOUG09238-D12	BIOBus 2012	14-Jul-2012	Canada	Saskatchewan	Prince Albert NP	Spruce River Highlands Trail		53.713	-106.048	542				GPSmap 60Cx				Forest	Sweep Net	Standard 5 minute sweeping (3)|Sunny, Hazy, 30 degrees celsius|Mixed wood forest, poplar/white spruce	BIOUG:PRINCEALB-NP:1
BIOUG12038-B01	F.Tremblay	30-Jul-2013	Canada	Quebec	Forillon National Park	trail off of park compound (i.e. operation centre), 1501 boul. Forillon	mixed forest (spruce, poplar)	48.857	-64.376	135				GPS
BIOUG00989-A07	Alex Smith	29-Oct-2010	Canada	Ontario	Guelph	25 Division St.		43.554	-80.264	326				GPS
BIOUG10479-G03	F.Tremblay	18-Jul-2013	Canada	Quebec	Forillon National Park	trail off of park compound (i.e. operation centre), 1501 boul. Forillon	mixed forest (spruce, poplar)	48.857	-64.376	135				GPS					Malaise Trap		BIOUG:FORILLON-NP
BIOUG11908-G11	F.Tremblay	15-Jul-2013	Canada	Quebec	Forillon National Park	trail off of park compound (i.e. operation centre), 1501 boul. Forillon	mixed forest (spruce, poplar)	48.857	-64.376	135				GPS
BIOUG03486-E11	Jarret Hardisty	26-Jul-2012	Canada	Alberta	Waterton Lakes NP	Foothills Parkland Region		49.083	-113.876	1338				GPS			4	Forest	Malaise Trap	Malaise Trap||Aspen forest	BIOUG:WATERTON-NP:4
WMIC 0240	M. Sharkey	31-Jul-2005	Canada	Prince Edward Island	Georgetown		near Georgetown	46.417	-62.667	8
BIOUG04245-B04	Jarret Hardisty	26-Jul-2012	Canada	Alberta	Waterton Lakes NP	Foothills Parkland Region		49.083	-113.876	1338				GPS			4	Forest	Malaise Trap	Malaise Trap||Aspen forest	BIOUG:WATERTON-NP:4
MIC 000062		26-Aug-1976	United States	North Carolina	Avery County		Linville
BIOUG11907-B04	F.Tremblay	15-Jul-2013	Canada	Quebec	Forillon National Park	trail off of park compound (i.e. operation centre), 1501 boul. Forillon	mixed forest (spruce, poplar)	48.857	-64.376	135				GPS
BIOUG01327-H05	James Sones	04-Oct-2010	Canada	Ontario	Leeds and Grenville	Elizabethtown-Kitley	4452 Rowsome Rd., Elizabethtown	44.621	-75.773	112				Google Earth	5		4	Temperate mixed forest	Malaise trap		BIOUG:Elizabethtown	October 01-08 2010
BIOUG11625-E04	Cavan Harpur	26-Aug-2013	Canada	Ontario	Heron Bay	Pukaskwa National Park		48.601	-86.289	631				GPS
BIOUG01657-E06	J. Cossey	06-Oct-2011	Canada	Ontario		Carden Alvar	North Bear	44.695	-79.039
07PROBE-22328	A.Renaud	02-Aug-2007	Canada	Manitoba	Churchill		23 km E Churchill, Ramsay Creek	58.731	-93.78	10											BIOUG:Churchill
BIOUG11759-F05	Matt Davis	25-Jul-2013	Canada	Nova Scotia	Kejimkujik National Park		Jeremy`s Bay Campground, near Ampitheater off of Campfire Circle	44.407	-65.245	116				WGS84
CAM0960	H. Goulet, A. Badiss, C. Boudeault	16-Jul-2008	Canada	Newfoundland and Labrador	Plum Point		Plum Point, fallow field	51.064	-56.982
BIOUG14172-C09	Cavan Harpur	01-Sep-2013	Canada	Ontario	Heron Bay	Pukaskwa National Park		48.601	-86.289	631				GPS
BIOUG01631-D07	James Sones	14-Sep-2011	Canada	Ontario	Leeds and Grenville	Elizabethtown-Kitley	4452 Rowsome Rd., Elizabethtown	44.618	-75.775	111				Google Earth	5		6	Temperate mixed forest	Malaise trap		BIOUG:Elizabethtown	Sep 9-20, 2011
BIOUG08683-C10	BIO Collections Staff	27-Sep-2013	Canada	Ontario	Wellington County	Guelph	Biodiversity Institute of Ontario	43.528	-80.229	335									Malaise trap		BIOUG:SCHOOL-MTP
BIOUG14172-G04	Cavan Harpur	01-Sep-2013	Canada	Ontario	Heron Bay	Pukaskwa National Park		48.601	-86.289	631				GPS
CAM0009	H. Goulet	19-Sep-2007	Canada	Ontario	Ottawa		Ottawa city garden	45.356	-75.707
BIOUG08669-D07	BIO Collections Staff	13-Jun-2013	Canada	Ontario	Wellington County	Guelph	Biodiversity Institute of Ontario	43.528	-80.229	335									Malaise trap		BIOUG:BIOINST
CAM0940	H. Goulet, A. Badiss, C. Boudeault	17-Jul-2008	Canada	Newfoundland and Labrador	Corner Brook		Corner Brook, fallow field	48.956	-57.911
MIC 000087		16-Jul-1972	Canada	Ontario	Rondeau Provincial Park
BIOUG08641-D09	M.Neerhof, S.Lipskie	27-Sep-2013	Canada	Ontario	Guelph	John F. Ross Collegiate & Vocational Institute	EQP-CLL-524	43.562	-80.247	329									Malaise trap		BIOUG:SCHOOL-MTP
BIOUG08683-G07	BIO Collections Staff	27-Sep-2013	Canada	Ontario	Wellington County	Guelph	Biodiversity Institute of Ontario	43.528	-80.229	335									Malaise trap		BIOUG:SCHOOL-MTP
BIOUG08663-H08	Anne Parkhill	27-Sep-2013	Canada	Ontario	Paris	Holy Family School	EQP-CLL-560	43.207	-80.391	250									Malaise trap		BIOUG:SCHOOL-MTP
BIOUG09765-A01	Lydia Attard, Kyla Greenham	27-Aug-2013	Canada	Ontario	Toronto	Rouge National Urban Park, Trap 1		43.822	-79.19	136				GPS					Malaise trap		BIOUG:ROUGE-NP
BIOUG08683-C04	BIO Collections Staff	27-Sep-2013	Canada	Ontario	Wellington County	Guelph	Biodiversity Institute of Ontario	43.528	-80.229	335									Malaise trap		BIOUG:SCHOOL-MTP
BIOUG14108-F04	Cavan Harpur	01-Sep-2013	Canada	Ontario	Heron Bay	Pukaskwa National Park		48.601	-86.289	631				GPS
BIOUG08647-G04	Lisa Cairncross	27-Sep-2013	Canada	Ontario	St. Marys	Little Falls Public School	EQP-CLL-554	43.259	-81.142	305									Malaise trap		BIOUG:SCHOOL-MTP
BIOUG09932-C07	BIO Collections Staff	04-Oct-2013	Canada	Ontario	Wellington County	Guelph	Biodiversity Institute of Ontario	43.528	-80.229	335									Malaise trap		BIOUG:BIOINST
HYM00001023	Goulet & Boudreault	11-Jun-2007	Canada	Manitoba			Gardenton	49.079	-96.766	292
BIOUG10202-A04	Chris Johnstone	27-Aug-2013	Canada	Ontario	Georgian Bay Islands National Park	Beausoleil Island	Cedar Spring Campground, mixed forest	44.852	-79.874	177				GPS
CAM0342	Goulet & Fernandez	29-May-2008	Canada	Ontario	Almonte		5 km NW of Almonte, Hwy 49, Burnt Land, Alvar Prov. Park	45.255	-76.14
MIC 000903	H. Goulet, A. Badiss, C. Boudeault	17-Jul-2008	Canada	Newfoundland and Labrador			Corner Brook, fallow field	48.956	-57.911
BIOUG11707-A06	Cavan Harpur	26-Aug-2013	Canada	Ontario	Heron Bay	Pukaskwa National Park		48.601	-86.289	631				GPS
HYM00001022	Goulet & Boudreault	11-Jun-2007	Canada	Manitoba			Gardenton	49.079	-96.766	292
BIOUG06823-D09	Thousand Islands NP	12-Aug-2012	Canada	Ontario	Thousand Islands NP	Jones Creek by Mallorytown, County Rd. 5		44.475	-75.865	117				GPS			4	Forest	Malaise Trap	Malaise Trap||Sugar maple and white birch	BIOUG:STLAW-NP
BIOUG08647-C01	Lisa Cairncross	27-Sep-2013	Canada	Ontario	St. Marys	Little Falls Public School	EQP-CLL-554	43.259	-81.142	305									Malaise trap		BIOUG:SCHOOL-MTP
MIC 000910	H. Goulet, A. Badiss, C. Boudeault	16-Jul-2008	Canada	Newfoundland and Labrador			Plum Point, fallow field	51.064	-56.848
CAM0526	A. Bennett		Canada	Ontario	Ottawa		Mixed forest near Manotick	45.235	-75.624
CAM0962	H. Goulet, A. Badiss, C. Boudeault	17-Jul-2008	Canada	Newfoundland and Labrador	Corner Brook		Corner Brook, fallow field	48.956	-57.911
MIC 000493	H. Goulet, A. Badiss, C. Boudeault	23-Jul-2008	Canada	Prince Edward Island			Blooming Point, fallow field	46.408	-62.951	6
BIOUG06549-D07	Nicole Labine	05-Aug-2012	Canada	Alberta	Wood Buffalo NP	Benchmark weather station		59.561	-112.261	219				GPS			4	Forest	Malaise Trap	Malaise Trap||Aspen stand	BIOUG:WOODBUFF-NP
BIOUG03220-A01	Heidi Brown	01-Jun-2012	Canada	Ontario	Point Pelee NP	Cactus Field		41.939	-82.516	168				GPS			4	Mixed Habitat	Malaise Trap	Malaise Trap||Cedar / Savannah	BIOUG:PELEE-NP	TRAP;May 30 - Jun 6
CAM0290	H. Goulet, A. Badiss, C. Boudeault	26-Jul-2008	Canada	Quebec	Belle-Anse		Belle-Anse	48.625	-64.178
MIC 000637	H. Goulet	24-Jul-2007	Canada	Manitoba	Aweme		Criddle Homestead, mixed-grass prairie	49.706	-99.576
CAM0011	H. Goulet	30-May-2007	Canada	Ontario	Ottawa		Ottawa city garden	45.356	-75.707
HYM00001027	Goulet & Boudreault	11-Jun-2007	Canada	Manitoba			Gardenton	49.079	-96.766	292
BIOUG06823-E10	Thousand Islands NP	12-Aug-2012	Canada	Ontario	Thousand Islands NP	Jones Creek by Mallorytown, County Rd. 5		44.475	-75.865	117				GPS			4	Forest	Malaise Trap	Malaise Trap||Sugar maple and white birch	BIOUG:STLAW-NP
CAM0939	H. Goulet, A. Badiss, C. Boudeault	17-Jul-2008	Canada	Newfoundland and Labrador	Corner Brook		Corner Brook, fallow field	48.956	-57.911
BIOUG11771-G06	Cavan Harpur	26-Aug-2013	Canada	Ontario	Heron Bay	Pukaskwa National Park		48.601	-86.289	631				GPS
BIOUG08748-E07	BIO Collections Staff	27-Jun-2013	Canada	Ontario	Wellington County	Guelph	Biodiversity Institute of Ontario	43.528	-80.229	335									Malaise trap		BIOUG:BIOINST
CAM0352	Goulet & Fernandez	29-May-2008	Canada	Ontario	Almonte		5 km NW of Almonte, Hwy 49, Burnt Land, Alvar Prov. Park	45.255	-76.14
CAM0448	S. Peck	01-Oct-2008	Canada	Ontario	Leeds		Leeds-Granville Co., forest	44.629	-76.359
BIOUG09807-F11	BIO Collections Staff	19-Sep-2013	Canada	Ontario	Wellington County	Guelph	Biodiversity Institute of Ontario	43.528	-80.229	335									Malaise trap		BIOUG:BIOINST
BIOUG06471-C10	BIOBus 2012	24-Jul-2012	Canada	Alberta	Banff NP	Corral Creek old road		51.407	-116.154	1539				GPSmap 60Cx			3		Malaise Trap	2 Malaise Traps|mix of sun and clouds	BIOUG:BANFF-NP:2
CNCH3194	Goulet & Bouderault	17-Jul-2009	United States	Alaska			Trapper Creek, Petersville Road	62.316	-150.261	127
BIOUG03220-F05	Heidi Brown	01-Jun-2012	Canada	Ontario	Point Pelee NP	Cactus Field		41.939	-82.516	168				GPS			4	Mixed Habitat	Malaise Trap	Malaise Trap||Cedar / Savannah	BIOUG:PELEE-NP	TRAP;May 30 - Jun 6
CAM0289	H. Goulet, A. Badiss, C. Boudeault	26-Jul-2008	Canada	Quebec	Belle-Anse		Belle-Anse	48.625	-64.178
BIOUG01657-F10	J. Cossey	06-Oct-2011	Canada	Ontario		Carden Alvar	North Bear	44.695	-79.039
CAM0344	Goulet & Fernandez	29-May-2008	Canada	Ontario	Almonte		5 km NW of Almonte, Hwy 49, Burnt Land, Alvar Prov. Park	45.255	-76.14
HYM00001003	Bennet & Barnes	15-Jun-2004	Canada	Ontario			North Gower to Smith Falls, 1 km N of Rd 6 & Montague Bdy Rd	45.033	-75.9
CAM0525	A. Bennett		Canada	Ontario	Ottawa		Mixed forest near Manotick	45.235	-75.624
BIOUG08643-F01	Linda Phillips	27-Sep-2013	Canada	Ontario	Whitby	Donald A. Wilson Secondary School	EQP-CLL-597	43.894	-78.964	91									Malaise trap		BIOUG:SCHOOL-MTP
MIC 000090	L. Masner	15-Jun-1977	Canada	Quebec			Gatineau Park
BIOUG00761-A09	Brandon Laforest	31-Jul-2010	Canada	Manitoba	Churchill	10 km ESE Churchill, Launch Road near A-frame	Launch road Fen	58.754	-93.998					GPS, WGS84					Sweep Net		BIOUG:Churchill
HYM00000665.2		17-Aug-2006	Canada	Manitoba	Churchill		unspecified locality	58.74	-93.82
BIOUG09925-E09	BIO Collections Staff	27-Sep-2013	Canada	Ontario	Wellington County	Guelph	Biodiversity Institute of Ontario	43.528	-80.229	335									Malaise trap		BIOUG:BIOINST
MIC 000084	L. Milne	24-Aug-1929	Canada	Quebec			Knowlton
BIOUG01572-H03	J. Cossey	06-Oct-2011	Canada	Ontario		Carden Alvar	Prairie Smoke	44.645	-79.095
CAM0114	H. Goulet	10-Aug-2007	Canada	Ontario	Ottawa		Ottawa city garden	45.356	-75.707
BIOUG14107-D02	Cavan Harpur	01-Sep-2013	Canada	Ontario	Heron Bay	Pukaskwa National Park		48.601	-86.289	631				GPS
CAM0345	Goulet & Fernandez	29-May-2008	Canada	Ontario	Almonte		5 km NW of Almonte, Hwy 49, Burnt Land, Alvar Prov. Park	45.255	-76.14
CAM0963	H. Goulet, A. Badiss, C. Boudeault	10-Jul-2008	Canada	Newfoundland and Labrador	St-David`s		St-David`s, fallow field	48.205	-58.866
CAM0288	H. Goulet, A. Badiss, C. Boudeault	26-Jul-2008	Canada	Quebec	Belle-Anse		Belle-Anse	48.625	-64.178
CAM0341	Goulet & Fernandez	29-May-2008	Canada	Ontario	Almonte		5 km NW of Almonte, Hwy 49, Burnt Land, Alvar Prov. Park	45.255	-76.14
CAM0106	H. Goulet	08-Sep-2007	Canada	Ontario	Ottawa		Ottawa city garden	45.356	-75.707
BIOUG06823-E06	Thousand Islands NP	12-Aug-2012	Canada	Ontario	Thousand Islands NP	Jones Creek by Mallorytown, County Rd. 5		44.475	-75.865	117				GPS			4	Forest	Malaise Trap	Malaise Trap||Sugar maple and white birch	BIOUG:STLAW-NP
HYM00001019	Goulet & Boudreault	11-Jun-2007	Canada	Manitoba			Gardenton	49.079	-96.766	292
CAM0154	H. Goulet	01-Sep-2007	Canada	Ontario	Ottawa		Ottawa city garden	45.356	-75.707
CAM0340	Goulet & Fernandez	29-May-2008	Canada	Ontario	Almonte		5 km NW of Almonte, Hwy 49, Burnt Land, Alvar Prov. Park	45.255	-76.14
HYM00001028	Goulet & Boudreault	11-Jun-2007	Canada	Manitoba			Vita Tallgrass prairie	49.147	-96.681
HYM00001024	Goulet & Boudreault	11-Jun-2007	Canada	Manitoba			Gardenton	49.079	-96.766	292
CAM0161	H. Goulet	01-Sep-2007	Canada	Ontario	Ottawa		Ottawa city garden	45.356	-75.707
BIOUG12486-D10	Park Staff	06-Aug-2013	Canada	Quebec	Mingan Archipelago National Park Reserve	Quarry Island	bog near forest edge	50.2135	-63.798					GPS
PCPP10-0466	T.F.Mitterboeck, C.Vandermeer, V.Junea, C.Sobel	23-Jun-2010	Canada	Ontario	Point Pelee NP	15km SE of Leamington	Cactus Patch Meadow off Bike Trail on Route to Visitors Centre	41.934	-82.514	174				GPS WGS84				Forest	UV Bucket Trap	UV Bucket Trap||Drummonds Dogwood Deciduous Shrub Thicket
BIOUG12736-B05	J.Garber, M.Davis	18-Jul-2013	Canada	Nova Scotia	Kejimkujik National Park		Jeremy`s Bay Campground, near Ampitheater off of Campfire Circle	44.4066	-65.245	116				WGS84
10BBHYM-1225	Biobus 2010	07-Mar-2010	United States	Florida	Kissimmee Prairie Preserve SP		mesic hammock	27.582	-81.048	15
HYM00001004	Goulet & Boudreault	11-Jun-2007	Canada	Manitoba		Gardenton		49.079	-96.766	292
CAM0008	H. Goulet	19-Sep-2007	Canada	Ontario	Ottawa		Ottawa city garden	45.356	-75.707
BIOUG08799-G08	BIO Collections Staff	27-Jun-2013	Canada	Ontario	Wellington County	Guelph	Biodiversity Institute of Ontario	43.528	-80.229	335									Malaise trap		BIOUG:BIOINST
CAM0521	A. Bennett		Canada	Ontario	Ottawa		Mixed forest near Manotick	45.235	-75.624
BIOUG04041-A02	Thousand Islands NP	15-Sep-2012	Canada	Ontario	Thousand Islands NP	Jones Creek by Mallorytown, County Rd. 5		44.475	-75.865	117				GPS			3	Forest	Malaise Trap	Malaise Trap|Very heavy rain over this period|Sugar maple and white birch	BIOUG:STLAW-NP
BIOUG03979-A07	Thousand Islands NP	21-Aug-2012	Canada	Ontario	Thousand Islands NP	Jones Creek by Mallorytown, County Rd. 5		44.475	-75.865	117				GPS			5	Forest	Malaise Trap	Malaise Trap||Sugar maple and white birch	BIOUG:STLAW-NP
BIOUG03979-B04	Thousand Islands NP	21-Aug-2012	Canada	Ontario	Thousand Islands NP	Jones Creek by Mallorytown, County Rd. 5		44.475	-75.865	117				GPS			5	Forest	Malaise Trap	Malaise Trap||Sugar maple and white birch	BIOUG:STLAW-NP
BIOUG00991-B03	Alex Smith	01-Aug-2010	Canada	Ontario	Haldimond-Dunn Townline	Windy Bluff		42.861	-79.703	179				GPS
CAM0166	H. Goulet	01-Sep-2007	Canada	Ontario	Ottawa		Ottawa city garden	45.356	-75.707
CAM0103	H. Goulet	08-Sep-2007	Canada	Ontario	Ottawa		Ottawa city garden	45.356	-75.707
BIOUG07898-C04	BIO Team	15-Sep-2013	Canada	Ontario	Rouge National Urban Park		Sector 7	43.825	-79.203	135				GPS
BIOUG09931-A07	BIO Collections Staff	04-Oct-2013	Canada	Ontario	Wellington County	Guelph	Biodiversity Institute of Ontario	43.528	-80.229	335									Malaise trap		BIOUG:BIOINST
BIOUG12977-D11	Medo Toure	01-Aug-2013	Canada	Quebec	La Mauricie National Park	Saint-Mathieu west park entrance near Visitor Centre	primarily conifer forest stand (balsam fir, Epicea glauca, birch)	46.6507	-72.97	219				GPS
BIOUG08641-G07	M.Neerhof, S.Lipskie	27-Sep-2013	Canada	Ontario	Guelph	John F. Ross Collegiate & Vocational Institute	EQP-CLL-524	43.562	-80.247	329									Malaise trap		BIOUG:SCHOOL-MTP
CNCHYM 00107	N.C.D.A	07-Jun-1976	United States	North Carolina	Swain County		Smokemont
CAM0938	H. Goulet, A. Badiss, C. Boudeault	18-Jul-2008	Canada	Newfoundland and Labrador	St-Andrew`s		St-Andrew`s, fallow field	47.793	-59.233
CAM0348	Goulet & Fernandez	29-May-2008	Canada	Ontario	Almonte		5 km NW of Almonte, Hwy 49, Burnt Land, Alvar Prov. Park	45.255	-76.14
BIOUG08647-G07	Lisa Cairncross	27-Sep-2013	Canada	Ontario	St. Marys	Little Falls Public School	EQP-CLL-554	43.259	-81.142	305									Malaise trap		BIOUG:SCHOOL-MTP
BIOUG03979-B03	Thousand Islands NP	21-Aug-2012	Canada	Ontario	Thousand Islands NP	Jones Creek by Mallorytown, County Rd. 5		44.475	-75.865	117				GPS			5	Forest	Malaise Trap	Malaise Trap||Sugar maple and white birch	BIOUG:STLAW-NP
CAM0346	Goulet & Fernandez	29-May-2008	Canada	Ontario	Almonte		5 km NW of Almonte, Hwy 49, Burnt Land, Alvar Prov. Park	45.255	-76.14
BIOUG01795-D07	J. Cossey	05-Oct-2011	Canada	Ontario			Scheck Nature Reserve	44.349	-76.895					GPS
BIOUG11996-F03	Cavan Harpur	09-Sep-2013	Canada	Ontario	Heron Bay	Pukaskwa National Park		48.601	-86.289	631				GPS
BIOUG11597-E04	D.Crossland, K.Rowter	11-Jul-2013	Canada	Nova Scotia	Kejimkujik National Park		Jeremy`s Bay Campground, near Ampitheater off of Campfire Circle	44.407	-65.245	116				WGS84
CAM0445	S. Peck	01-Oct-2008	Canada	Ontario	Leeds		Leeds-Granville Co., forest	44.629	-76.359
BIOUG07903-F12	BIO Team	15-Sep-2013	Canada	Ontario	Rouge National Urban Park		Sector 8	43.859	-79.209	167				GPS
CAM0527	A. Bennett		Canada	Ontario	Ottawa		Mixed forest near Manotick	45.235	-75.624
BIOUG01657-C11	J. Cossey	06-Oct-2011	Canada	Ontario		Carden Alvar	North Bear	44.695	-79.039
09BBEHY-2030	BIObus 2009	20-Aug-2009	Canada	New Brunswick	Kouchibouguac NP	Research House		46.771	-65.006	52								Forest		||Corridor between Mixed Forest
BIOUG09770-A04	Lydia Attard, Kyla Greenham	14-Sep-2013	Canada	Ontario	Toronto	Rouge National Urban Park, Trap 1		43.822	-79.19	136				GPS					Malaise trap		BIOUG:ROUGE-NP
CAM0531	A. Bennett		Canada	Ontario	Ottawa		Mixed forest near Manotick	45.235	-75.624
CAM0007	H. Goulet	19-Sep-2007	Canada	Ontario	Ottawa		Ottawa city garden	45.356	-75.707
BIOUG12487-D03	Park Staff	06-Aug-2013	Canada	Quebec	Mingan Archipelago National Park Reserve	Quarry Island	bog near forest edge	50.2135	-63.798					GPS
MIC 000086		24-Jul-1956	Canada	Ontario			Brighton
ASGLE-0880	Alex Smith	01-Nov-2009	Canada	Ontario	Guelph	25 Division St.		43.554	-80.264	326
BIOUG03887-F12	Thousand Islands NP	02-Sep-2012	Canada	Ontario	Thousand Islands NP	Jones Creek by Mallorytown, County Rd. 5		44.475	-75.865	117				GPS			4	Forest	Malaise Trap	Malaise Trap||Sugar maple and white birch	BIOUG:STLAW-NP
BIOUG08665-D12	Anne Parkhill	27-Sep-2013	Canada	Ontario	Paris	Holy Family School	EQP-CLL-560	43.207	-80.391	250									Malaise trap		BIOUG:SCHOOL-MTP
BIOUG09515-E11	BIO Collections Staff	22-Aug-2013	Canada	Ontario	Wellington County	Guelph	Biodiversity Institute of Ontario	43.528	-80.229	335									Malaise trap		BIOUG:BIOINST
CAM0022	H. Goulet	13-Jul-2007	Canada	Ontario	Ottawa		Ottawa city garden	45.356	-75.707
CAM0446	S. Peck	01-Oct-2008	Canada	Ontario	Leeds		Leeds-Granville Co., forest	44.629	-76.359
BIOUG01631-A09	James Sones	18-Aug-2011	Canada	Ontario	Leeds and Grenville	Elizabethtown-Kitley	4452 Rowsome Rd., Elizabethtown	44.618	-75.775	111				Google Earth	5		5	Temperate mixed forest	Malaise trap		BIOUG:Elizabethtown	Aug 14-23, 2011
CAM0635	N. Islam	12-Aug-2007	Canada	Ontario	Cochrane		Cochrane & Kapuscaning Forest Reserves	49.398	-80.472
CAM0335	Goulet & Fernandez	29-May-2008	Canada	Ontario	Almonte		5 km NW of Almonte, Hwy 49, Burnt Land, Alvar Prov. Park	45.255	-76.14
GOU 0570	J. Fernandez	04-Aug-2009	Canada	Nova Scotia			Kejimkujik National Park, Grafton Lake	44.383	-65.202
BIOUG07902-D08	BIO Team	15-Sep-2013	Canada	Ontario	Rouge National Urban Park		Sector 8	43.859	-79.209	167				GPS
HYM00001026	Goulet & Boudreault	11-Jun-2007	Canada	Manitoba			Gardenton	49.079	-96.766	292
CAM0523	A. Bennett		Canada	Ontario	Ottawa		Mixed forest near Manotick	45.235	-75.624
CAM0356	Goulet & Fernandez	29-May-2008	Canada	Ontario	Almonte		5 km NW of Almonte, Hwy 49, Burnt Land, Alvar Prov. Park	45.255	-76.14
CNCH1358	Goulet & Boudreault	08-Jun-2003	United States	Alaska			Anchorage	61.166	-149.766	33
MIC 000083	O. Peck	09-Jun-1939	Canada	Ontario	Ottawa		Blackburn
BIOUG12977-D01	Medo Toure	01-Aug-2013	Canada	Quebec	La Mauricie National Park	Saint-Mathieu west park entrance near Visitor Centre	primarily conifer forest stand (balsam fir, Epicea glauca, birch)	46.6507	-72.97	219				GPS
BIOUG11331-F04	J. Howard, C. Johnstone	19-Aug-2013	Canada	Ontario	Georgian Bay Islands National Park	Beausoleil Island, Cedar Spring Campground	Mixed forest	44.852	-79.874	177				GPS
BIOUG03863-G08	Thousand Islands NP	21-Aug-2012	Canada	Ontario	Thousand Islands NP	Jones Creek by Mallorytown, County Rd. 5		44.475	-75.865	117				GPS			5	Forest	Malaise Trap	Malaise Trap||Sugar maple and white birch	BIOUG:STLAW-NP
BIOUG09765-B03	Lydia Attard, Kyla Greenham	27-Aug-2013	Canada	Ontario	Toronto	Rouge National Urban Park, Trap 1		43.822	-79.19	136				GPS					Malaise trap		BIOUG:ROUGE-NP
CAM0410	Goulet, Boudreault & Fernandez	04-Jun-2008	Canada	Ontario	Manitoulin Island		Little Current, prairie alvar	45.975	-81.904
CAM0113	H. Goulet	10-Aug-2007	Canada	Ontario	Ottawa		Ottawa city garden	45.356	-75.707
WMIC 0517	L. Gualtieri	07-Jul-2003	Canada	Ontario			London	43.03	-81.206
BIOUG11999-F03	Cavan Harpur	09-Sep-2013	Canada	Ontario	Heron Bay	Pukaskwa National Park		48.601	-86.289	631				GPS
BIOUG00726-B07	Brandon Laforest	29-Jul-2010	Canada	Manitoba	Churchill	23 km SE Churchill, Twin Lakes Road fen	fen grasses and willows, 5km down Twin lakes rd	58.672	-93.839					GPS, WGS84					Sweeping		BIOUG:Churchill
CAM0151	H. Goulet	01-Sep-2007	Canada	Ontario	Ottawa		Ottawa city garden	45.356	-75.707
CAM0524	A. Bennett		Canada	Ontario	Ottawa		Mixed forest near Manotick	45.235	-75.624
BIOUG03123-B05	Thousand Islands NP	24-Jun-2012	Canada	Ontario	Thousand Islands NP	Jones Creek by Mallorytown, County Rd. 5		44.475	-75.865	117				GPS			4	Forest	Malaise Trap	Malaise Trap||Sugar maple and white birch	BIOUG:STLAW-NP
CAM0013	H. Goulet	30-May-2007	Canada	Ontario	Ottawa		Ottawa city garden	45.356	-75.707
MIC 000082	G. Shewell	20-Jun-1947	Canada	Ontario	Ottawa		Britannia
BIOUG14171-B01	Cavan Harpur	01-Sep-2013	Canada	Ontario	Heron Bay	Pukaskwa National Park		48.601	-86.289	631				GPS
CAM0942	H. Goulet, A. Badiss, C. Boudeault	18-Jul-2008	Canada	Newfoundland and Labrador	St-Andrew`s		St-Andrew`s, fallow field	47.793	-59.233
BIOUG09803-F06	BIO Collections Staff	19-Sep-2013	Canada	Ontario	Wellington County	Guelph	Biodiversity Institute of Ontario	43.528	-80.229	335									Malaise trap		BIOUG:BIOINST
BIOUG07004-C04	Thousand Islands NP	15-Jul-2012	Canada	Ontario	Thousand Islands NP	Jones Creek by Mallorytown, County Rd. 5		44.475	-75.865	117				GPS			4	Forest	Malaise Trap	Malaise Trap||Sugar maple and white birch	BIOUG:STLAW-NP
CAM0529	A. Bennett		Canada	Ontario	Ottawa		Mixed forest near Manotick	45.235	-75.624
CAM0074	H. Goulet	26-Jun-2007	Canada	Ontario	Ottawa		Ottawa city garden	45.356	-75.707
BIOUG06823-E08	Thousand Islands NP	12-Aug-2012	Canada	Ontario	Thousand Islands NP	Jones Creek by Mallorytown, County Rd. 5		44.475	-75.865	117				GPS			4	Forest	Malaise Trap	Malaise Trap||Sugar maple and white birch	BIOUG:STLAW-NP
BIOUG08665-A11	Anne Parkhill	27-Sep-2013	Canada	Ontario	Paris	Holy Family School	EQP-CLL-560	43.207	-80.391	250									Malaise trap		BIOUG:SCHOOL-MTP
BIOUG01631-G11	James Sones	14-Sep-2011	Canada	Ontario	Leeds and Grenville	Elizabethtown-Kitley	4452 Rowsome Rd., Elizabethtown	44.618	-75.775	111				Google Earth	5		6	Temperate mixed forest	Malaise trap		BIOUG:Elizabethtown	Sep 9-20, 2011
BIOUG12974-A03	Medo Toure	01-Aug-2013	Canada	Quebec	La Mauricie National Park	Saint-Mathieu west park entrance near Visitor Centre	primarily conifer forest stand (balsam fir, Epicea glauca, birch)	46.6507	-72.97	219				GPS
CAM0447	S. Peck	01-Oct-2008	Canada	Ontario	Leeds		Leeds-Granville Co., forest	44.629	-76.359
BIOUG01597-F04	James Sones	18-Aug-2011	Canada	Ontario	Leeds and Grenville	Elizabethtown-Kitley	4452 Rowsome Rd., Elizabethtown	44.618	-75.775	111				Google Earth	5		5	Temperate mixed forest	Malaise trap		BIOUG:Elizabethtown	Aug 14-23, 2011
BIOUG08647-D01	Lisa Cairncross	27-Sep-2013	Canada	Ontario	St. Marys	Little Falls Public School	EQP-CLL-554	43.259	-81.142	305									Malaise trap		BIOUG:SCHOOL-MTP
BIOUG01657-F02	J. Cossey	06-Oct-2011	Canada	Ontario		Carden Alvar	North Bear	44.695	-79.039
BIOUG09765-A12	Lydia Attard, Kyla Greenham	27-Aug-2013	Canada	Ontario	Toronto	Rouge National Urban Park, Trap 1		43.822	-79.19	136				GPS					Malaise trap		BIOUG:ROUGE-NP
BIOUG03979-H08	Thousand Islands NP	02-Sep-2012	Canada	Ontario	Thousand Islands NP	Jones Creek by Mallorytown, County Rd. 5		44.475	-75.865	117				GPS			4	Forest	Malaise Trap	Malaise Trap||Sugar maple and white birch	BIOUG:STLAW-NP
CAM0350	Goulet & Fernandez	29-May-2008	Canada	Ontario	Almonte		5 km NW of Almonte, Hwy 49, Burnt Land, Alvar Prov. Park	45.255	-76.14
BIOUG03931-F01	H.Brown	07-Sep-2012	Canada	Ontario	Point Pelee NP	Cactus Field		41.939	-82.516	168				GPS			4	Mixed Habitat	Malaise Trap	Malaise Trap||Cedar / Savannah	BIOUG:PELEE-NP	TRAP;Sept 5-12
BIOUG09930-G10	BIO Collections Staff	04-Oct-2013	Canada	Ontario	Wellington County	Guelph	Biodiversity Institute of Ontario	43.528	-80.229	335									Malaise trap		BIOUG:BIOINST
BIOUG08648-H10	Lisa Cairncross	27-Sep-2013	Canada	Ontario	St. Marys	Little Falls Public School	EQP-CLL-554	43.259	-81.142	305									Malaise trap		BIOUG:SCHOOL-MTP
BIOUG08752-A08	Lydia Attard, Kyla Greenham	03-Sep-2013	Canada	Ontario	Toronto	Rouge National Urban Park, Trap 1		43.822	-79.19	136				GPS					Malaise trap		BIOUG:ROUGE-NP
BIOUG12497-F12	Park Staff	06-Aug-2013	Canada	Quebec	Mingan Archipelago National Park Reserve	Quarry Island	bog near forest edge	50.2135	-63.798					GPS
BIOUG08665-F02	Anne Parkhill	27-Sep-2013	Canada	Ontario	Paris	Holy Family School	EQP-CLL-560	43.207	-80.391	250									Malaise trap		BIOUG:SCHOOL-MTP
BIOUG09930-E06	BIO Collections Staff	04-Oct-2013	Canada	Ontario	Wellington County	Guelph	Biodiversity Institute of Ontario	43.528	-80.229	335									Malaise trap		BIOUG:BIOINST
CAM0120	H. Goulet	30-Jul-2007	Canada	Ontario	Ottawa		Ottawa city garden	45.356	-75.707
BIOUG01661-E11	J. Cossey	06-Oct-2011	Canada	Ontario		Carden Alvar	North Bear	44.695	-79.039
BIOUG09765-A06	Lydia Attard, Kyla Greenham	27-Aug-2013	Canada	Ontario	Toronto	Rouge National Urban Park, Trap 1		43.822	-79.19	136				GPS					Malaise trap		BIOUG:ROUGE-NP
CAM0389	Boudreault, Goulet & Fernandez	03-Jun-2008	Canada	Ontario	Manitoulin Island		Misery Bay Prov. Park	45.792	-82.75	185
HYM00001020	Goulet & Boudreault	11-Jun-2007	Canada	Manitoba			Gardenton	49.079	-96.766	292
CAM0286	H. Goulet, A. Badiss, C. Boudeault	26-Jul-2008	Canada	Quebec	Belle-Anse		Belle-Anse	48.625	-64.178
CAM0163	H. Goulet	01-Sep-2007	Canada	Ontario	Ottawa		Ottawa city garden	45.356	-75.707
CAM0351	Goulet & Fernandez	29-May-2008	Canada	Ontario	Almonte		5 km NW of Almonte, Hwy 49, Burnt Land, Alvar Prov. Park	45.255	-76.14
TDWG-0384	BIObus: A.Borisenko, R.Labbee, V.Levesque-Beaudin, M.Milton, J.Smith, S.Ratnasingham	29-Sep-2010	United States	Massachusetts	Barnstable Country	Woods Hole|Woods Hole Village	Urban parkland: Meadow/Anthropogenic	41.529	-70.67
CAM0413	Boudreault, Goulet & Fernandez	03-Jun-2008	Canada	Ontario	Manitoulin Island		Misery Bay Prov. Park	45.792	-82.75	185
BIOUG06823-D07	Thousand Islands NP	12-Aug-2012	Canada	Ontario	Thousand Islands NP	Jones Creek by Mallorytown, County Rd. 5		44.475	-75.865	117				GPS			4	Forest	Malaise Trap	Malaise Trap||Sugar maple and white birch	BIOUG:STLAW-NP
CNCHYM 00106	F. Naumann	08-Oct-1970	United States	Georgia			Forsyth
BIOUG08499-C11	Kristen McGuire	27-Sep-2013	Canada	Ontario	Teeswater	Sacred Heart School	EQP-CLL-568	43.992	-81.282	314									Malaise trap		BIOUG:SCHOOL-MTP
CAM0360	Goulet & Fernandez	29-May-2008	Canada	Ontario	Almonte		5 km NW of Almonte, Hwy 49, Burnt Land, Alvar Prov. Park	45.255	-76.14
CAM0349	Goulet & Fernandez	29-May-2008	Canada	Ontario	Almonte		5 km NW of Almonte, Hwy 49, Burnt Land, Alvar Prov. Park	45.255	-76.14
CAM0115	H. Goulet	10-Aug-2007	Canada	Ontario	Ottawa		Ottawa city garden	45.356	-75.707
MIC 000085	H. Boyce	09-Jun-1944	Canada	Ontario			Grimsby
BIOUG03979-G06	Thousand Islands NP	02-Sep-2012	Canada	Ontario	Thousand Islands NP	Jones Creek by Mallorytown, County Rd. 5		44.475	-75.865	117				GPS			4	Forest	Malaise Trap	Malaise Trap||Sugar maple and white birch	BIOUG:STLAW-NP
CAM0964	H. Goulet, A. Badiss, C. Boudeault	10-Jul-2008	Canada	Newfoundland and Labrador	St-David`s		St-David`s, fallow field	48.205	-58.866
CAM0025	H. Goulet	30-Jul-2007	Canada	Ontario	Ottawa		Ottawa city garden	45.356	-75.707
MIC 000088		21-Jul-1975	Canada	Ontario	St. Lawrence Islands National Park		Grenadier Island Center
BIOUG08807-A09	BIO Collections Staff	27-Jun-2013	Canada	Ontario	Wellington County	Guelph	Biodiversity Institute of Ontario	43.528	-80.229	335									Malaise trap		BIOUG:BIOINST
CAM0101	H. Goulet	08-Sep-2007	Canada	Ontario	Ottawa		Ottawa city garden	45.356	-75.707
BIOUG09925-F01	BIO Collections Staff	27-Sep-2013	Canada	Ontario	Wellington County	Guelph	Biodiversity Institute of Ontario	43.528	-80.229	335									Malaise trap		BIOUG:BIOINST
BIOUG09345-D07	BIO Collections Staff	08-Aug-2013	Canada	Ontario	Wellington County	Guelph	Biodiversity Institute of Ontario	43.528	-80.229	335									Malaise trap		BIOUG:BIOINST
BIOUG09925-A01	BIO Collections Staff	27-Sep-2013	Canada	Ontario	Wellington County	Guelph	Biodiversity Institute of Ontario	43.528	-80.229	335									Malaise trap		BIOUG:BIOINST
BIOUG14261-G11	Medo Toure	23-Jul-2013	Canada	Quebec	La Mauricie National Park	Saint-Mathieu west park entrance near Visitor Centre	primarily conifer forest stand (balsam fir, Epicea glauca, birch)	46.651	-72.97	219				GPS
CAM0062	H. Goulet	26-Jun-2007	Canada	Ontario	Ottawa		Ottawa city garden	45.356	-75.707
BIOUG08665-D10	Anne Parkhill	27-Sep-2013	Canada	Ontario	Paris	Holy Family School	EQP-CLL-560	43.207	-80.391	250									Malaise trap		BIOUG:SCHOOL-MTP
CAM0076	H. Goulet	26-Jun-2007	Canada	Ontario	Ottawa		Ottawa city garden	45.356	-75.707
BIOUG11771-G09	Cavan Harpur	26-Aug-2013	Canada	Ontario	Heron Bay	Pukaskwa National Park		48.601	-86.289	631				GPS
BIOUG09807-D05	BIO Collections Staff	19-Sep-2013	Canada	Ontario	Wellington County	Guelph	Biodiversity Institute of Ontario	43.528	-80.229	335									Malaise trap		BIOUG:BIOINST
CAM0530	A. Bennett		Canada	Ontario	Ottawa		Mixed forest near Manotick	45.235	-75.624
HYM00001021	Goulet & Boudreault	11-Jun-2007	Canada	Manitoba			Gardenton	49.079	-96.766	292
CAM0528	A. Bennett		Canada	Ontario	Ottawa		Mixed forest near Manotick	45.235	-75.624
10BBCHY-1304	BIObus 2010	13-Aug-2010	Canada	Saskatchewan	Prince Albert NP	Boundary Bog Trl.		53.906	-106.03	568								Wetland	Free Hand	Free Hand|Cloudy, Windy|Bog
CNCH1025	L. Masner	06-Jul-2009	Canada	Ontario	Ottawa		Ottwa city garden	45.356	-75.707
CAM0399	Boudreault, Goulet & Fernandez	03-Jun-2008	Canada	Ontario	Manitoulin Island		Misery Bay Prov. Park	45.792	-82.75	185
BIOUG07902-D06	BIO Team	15-Sep-2013	Canada	Ontario	Rouge National Urban Park		Sector 8	43.859	-79.209	167				GPS
MIC 000089		15-Aug-1976	Canada	Ontario	St. Lawrence Islands National Park		Thwartway Island
BIOUG01631-A05	James Sones	18-Aug-2011	Canada	Ontario	Leeds and Grenville	Elizabethtown-Kitley	4452 Rowsome Rd., Elizabethtown	44.618	-75.775	111				Google Earth	5		5	Temperate mixed forest	Malaise trap		BIOUG:Elizabethtown	Aug 14-23, 2011
CAM0941	H. Goulet, A. Badiss, C. Boudeault	17-Jul-2008	Canada	Newfoundland and Labrador	Corner Brook		Corner Brook, fallow field	48.956	-57.911
CAM0961	H. Goulet, A. Badiss, C. Boudeault	10-Jul-2008	Canada	Newfoundland and Labrador	St-David`s		St-David`s, fallow field	48.205	-58.866
BIOUG10641-G12	Chris Johnstone	23-May-2013	Canada	Ontario	Georgian Bay Islands National Park	Georgian Bay Islands National Park, Administration Office, 901 Wye Valley Rd.	Marsh	44.742	-79.85	190				GPS					Malaise trap		BIOUG:GEOBAY-NP:1
BIOUG09631-C02	BIO Collections Staff	22-Aug-2013	Canada	Ontario	Wellington County	Guelph	Biodiversity Institute of Ontario	43.528	-80.229	335									Malaise trap		BIOUG:BIOINST
BIOUG14099-G10	Cavan Harpur	01-Sep-2013	Canada	Ontario	Heron Bay	Pukaskwa National Park		48.601	-86.289	631				GPS
BIOUG11758-F08	Matt Davis	25-Jul-2013	Canada	Nova Scotia	Kejimkujik National Park		Jeremy`s Bay Campground, near Ampitheater off of Campfire Circle	44.407	-65.245	116				WGS84
10BBCHY-1305	BIObus 2010	13-Aug-2010	Canada	Saskatchewan	Prince Albert NP	Boundary Bog Trl.		53.906	-106.03	568								Wetland	Free Hand	Free Hand|Cloudy, Windy|Bog
CAM0522	A. Bennett		Canada	Ontario	Ottawa		Mixed forest near Manotick	45.235	-75.624
CAM0347	Goulet & Fernandez	29-May-2008	Canada	Ontario	Almonte		5 km NW of Almonte, Hwy 49, Burnt Land, Alvar Prov. Park	45.255	-76.14
CNCHYM 00105	D. Shanek	23-Apr-1972	United States	Louisiana	Evangeline County		Bayou Chicot
BIOUG14170-E05	Cavan Harpur	01-Sep-2013	Canada	Ontario	Heron Bay	Pukaskwa National Park		48.601	-86.289	631				GPS
CAM0054	H. Goulet	23-Jul-2007	Canada	Ontario	Ottawa		Ottawa city garden	45.356	-75.707
HYM00000665		17-Aug-2006	Canada	Manitoba	Churchill			58.74	-93.82
BIOUG08749-G01	Lydia Attard, Kyla Greenham	03-Sep-2013	Canada	Ontario	Toronto	Rouge National Urban Park, Trap 1		43.822	-79.19	136				GPS					Malaise trap		BIOUG:ROUGE-NP
TDWG-0167	BIObus: A.Borisenko, R.Labbee, V.Levesque-Beaudin, M.Milton, J.Smith, S.Ratnasingham	29-Sep-2010	United States	Massachusetts	Barnstable Country	Woods Hole|near memoriall circle cottage #24	Mixed deciduous	41.53	-70.655	16
07PROBE-23393	A.Renaud	23-Jul-2007	Canada	Manitoba	Churchill	23 km E Churchill, Ramsay Creek		58.731	-93.78	10											BIOUG:Churchill
BIOUG07902-D03	BIO Team	15-Sep-2013	Canada	Ontario	Rouge National Urban Park		Sector 8	43.859	-79.209	167				GPS
CAM0099	H. Goulet	08-Sep-2007	Canada	Ontario	Ottawa		Ottawa city garden	45.356	-75.707
BIOUG08565-E09	Barb Maschke	27-Sep-2013	Canada	Ontario	Perth East	Mornington Central School	EQP-CLL-556	43.614	-80.885	380									Malaise trap		BIOUG:SCHOOL-MTP
MIC 000666	Goulet & Fernandez	29-May-2008	Canada	Ontario	Almonte		5 km NW of Almonte, Hwy 49, Burnt Land, Alvar Prov. Park	45.255	-76.14
CAM0146	H. Goulet	01-Sep-2007	Canada	Ontario	Ottawa		Ottawa city garden	45.356	-75.707
BIOUG09801-C03	BIO Collections Staff	05-Sep-2013	Canada	Ontario	Wellington County	Guelph	Biodiversity Institute of Ontario	43.528	-80.229	335									Malaise trap		BIOUG:BIOINST
MIC 000488	H. Goulet, A. Badiss, C. Boudeault	23-Jul-2008	Canada	Prince Edward Island			Blooming Point, fallow field	46.408	-62.951	6
BIOUG01572-D01	J. Cossey	06-Oct-2011	Canada	Ontario		Carden Alvar	Prairie Smoke	44.645	-79.095
HYM00001025	Goulet & Boudreault	11-Jun-2007	Canada	Manitoba			Gardenton	49.079	-96.766	292
CAM0072	H. Goulet	26-Jun-2007	Canada	Ontario	Ottawa		Ottawa city garden	45.356	-75.707
CAM0024	H. Goulet	30-Jul-2007	Canada	Ontario	Ottawa		Ottawa city garden	45.356	-75.707
BIOUG11726-F01	J. Howard, C. Johnstone	19-Aug-2013	Canada	Ontario	Georgian Bay Islands National Park	Beausoleil Island, Cedar Spring Campground	Mixed forest	44.852	-79.874	177				GPS
BIOUG12460-D06	Park Staff	06-Aug-2013	Canada	Quebec	Mingan Archipelago National Park Reserve	Quarry Island	bog near forest edge	50.2135	-63.798					GPS
BIOUG09930-G04	BIO Collections Staff	04-Oct-2013	Canada	Ontario	Wellington County	Guelph	Biodiversity Institute of Ontario	43.528	-80.229	335									Malaise trap		BIOUG:BIOINST
BIOUG03863-E06	Thousand Islands NP	05-Aug-2012	Canada	Ontario	Thousand Islands NP	Jones Creek by Mallorytown, County Rd. 5		44.475	-75.865	117				GPS			4	Forest	Malaise Trap	Malaise Trap|Warm rain in the latter part|Sugar maple and white birch	BIOUG:STLAW-NP
CAM0039	H. Goulet	10-Aug-2007	Canada	Ontario	Ottawa		Ottawa city garden	45.356	-75.707
CAM0409	Goulet, Boudreault & Fernandez	04-Jun-2008	Canada	Ontario	Manitoulin Island		Little Current, prairie alvar	45.975	-81.904
CBRA0492	J. Cossentine	10-Jun-1998	Canada	British Columbia			11 km S of Cawston			303
CBRA0493	H. Fry	05-Aug-2004	Canada	Newfoundland and Labrador			St. John`s
CNCHYM 00215	Doganlar	27-Jun-1978	Canada	British Columbia			Chilliwack
CBRA0491	J. Cossentine		Canada	British Columbia			11 km S of Cawston			303
MIC 000009	T. Renault	19-Jul-1961	Canada	New Brunswick			SE of Upsalq
CBRA0490	J. Cossentine	14-May-1998	Canada	British Columbia			11 km S of Cawston			303
MIC 000007	F. Peters	07-May-1977	Canada	British Columbia			Burnaby
MIC 000013	H. Fry	05-Aug-2004	Canada	Newfoundland and Labrador			St. John`s
MIC 000010	T. Renault	24-Jul-1961	Canada	New Brunswick			Green River Lab.
MIC 000011	J. Cossentine	14-May-1998	Canada	British Columbia			11 km S of Cawston			303
MIC 000014	H. Fry	05-Aug-2004	Canada	Newfoundland and Labrador			St. John`s
MIC 000005	Docanlar	07-May-1977	Canada	British Columbia			Burnaby
CBRA0495	H. Fry	05-Aug-2004	Canada	Newfoundland and Labrador			St. John`s
CBRA0494	H. Fry	05-Aug-2004	Canada	Newfoundland and Labrador			St. John`s
MIC 000012	J. Cossentine	13-Jul-1998	Canada	British Columbia			11 km S of Cawston			303
MIC 000006	Doganlar	07-May-1977	Canada	British Columbia			Burnaby
MIC 000008	F. Peters	02-Jun-1978	Canada	British Columbia			Summerland
BIOUG10637-H02	Anderson	17-Sep-2013	Canada	Newfoundland and Labrador	Gros Morne National Park	James Callaghan Trail (aka Gros Morne Trail)	mature conifer stand, balsam fir, wind damage	49.569	-57.83	39				GPS
07PROBE-22321	A.Renaud	12-Jul-2007	Canada	Manitoba	Churchill	16 km SW Churchill, Churchill River Pump House		58.626	-94.229												BIOUG:Churchill
BIOUG04486-G10	Rod Thompson, Eric Knight	10-Jul-2012	Canada	Saskatchewan	Prince Albert NP			53.85	-106.078	627				GPS			1	Forest	Malaise Trap	Malaise Trap||Mixed wood, apsen/white spruce	BIOUG:PRINCEALB-NP:2
MIC 000638	Goulet & Boudreault	28-May-2005	Canada	British Columbia	Sorrento		Sorrento, fallow field	50.779	-119.502
07PROBE-20921		07-Jul-2007	Canada	Manitoba	Churchill	16 km SW Churchill, Churchill River Pump House		58.626	-94.229												BIOUG:Churchill
CNCHYM 00401	Mailloux	19-Sep-1973	United States	New Jersey			Metuchen
BIOUG08665-E05	Anne Parkhill	27-Sep-2013	Canada	Ontario	Paris	Holy Family School	EQP-CLL-560	43.207	-80.391	250									Malaise trap		BIOUG:SCHOOL-MTP
BIOUG01258-H06	James Sones	15-Aug-2010	Canada	Ontario	Leeds and Grenville	Elizabethtown-Kitley	4452 Rowsome Rd., Elizabethtown	44.621	-75.773	112				Google Earth	5		2	Temperate mixed forest	Malaise trap		BIOUG:Elizabethtown	August 14-17 2010
CAM0542	A. Bennett		Canada	Ontario	Ottawa		Mixed forest near Manotick	45.235	-75.624
BIOUG08742-H10	BIO Collections Staff	27-Jun-2013	Canada	Ontario	Wellington County	Guelph	Biodiversity Institute of Ontario	43.528	-80.229	335									Malaise trap		BIOUG:BIOINST
CNCHYM 00404	H. T. Streu	01-Jul-1974	United States	New Jersey			Metuchen, Red Fescue
CNCHYM 00403		19-Sep-1973	United States	New Jersey			Metuchen
CNCHYM 00402		07-Sep-1973	United States	New Jersey			Metuchen
CAM1034	H. Goulet		Canada	Ontario	Ottawa		Ottwa city garden	45.356	-75.707
BIOUG03438-B06	Heidi Brown	15-Jun-2012	Canada	Ontario	Point Pelee NP	Cactus Field		41.939	-82.516	168				GPS			4	Mixed Habitat	Malaise Trap	Malaise Trap||Cedar / Savannah	BIOUG:PELEE-NP	TRAP;June 13-20
CAM0893	H. Goulet		Canada	Ontario	Ottawa		Ottwa city garden	45.356	-75.707
BIOUG03445-F01	Tyler Peters	29-Jun-2012	Canada	Ontario	Point Pelee NP	Cactus Field		41.939	-82.516	168				GPS			4	Mixed Habitat	Malaise Trap	Malaise Trap||Cedar / Savannah	BIOUG:PELEE-NP	TRAP;Jun 27 - Jul 4
CNCHYM 01091	Doganlar	09-Jul-1978	Canada	British Columbia			Burnaby
CNCHYM 01093		05-May-1978	Canada	British Columbia			New Westminster
CNCHYM 01089	Doganlar	01-Jul-1977	Canada	British Columbia			Burnaby
CNCHYM 00216	Doganlar	01-Jul-1977	Canada	British Columbia			Burnaby
CNCHYM 01363	D. B. Lyons	18-Aug-1978	Canada	New Brunswick			Kouchibouguac N.P.
CNCHYM 01366	W. R. Richards	29-Jul-1957	United States	North Carolina			Wayah Bald			1249.7
CNCHYM 01375	W. Mason	28-Jul-1983	Canada	Ontario			Kemptville
GOU 0314	Sharkey & Read	26-Jun-1991	Canada	Ontario			2 km SW of Innisville
CNCHYM 01365	J. R. Vockeroth	09-Aug-1958	Canada	Nova Scotia			Lockeport
CAM0473	H. Goulet, A. Badiss, C. Boudeault	23-Jul-2008	Canada	Prince Edward Island			Ten Mile House, salt marsh	46.313	-62.981
CNCHYM 01369	G. E. Shewell	08-Aug-1959	Canada	New Brunswick			St. Andrews
CAM0470	H. Goulet, A. Badiss, C. Boudeault	23-Jul-2008	Canada	Prince Edward Island			Ten Mile House, salt marsh	46.313	-62.981
CAM0471	H. Goulet, A. Badiss, C. Boudeault	23-Jul-2008	Canada	Prince Edward Island			Ten Mile House, salt marsh	46.313	-62.981
CAM0468	H. Goulet, A. Badiss, C. Boudeault	23-Jul-2008	Canada	Prince Edward Island			Ten Mile House, salt marsh	46.313	-62.981
CNCHYM 01370	J. G. Chillcott	12-Jul-1957	United States	North Carolina			Highlands			1158.25
CAM0463	H. Goulet, A. Badiss, C. Boudeault	23-Jul-2008	Canada	Prince Edward Island			Ten Mile House, salt marsh	46.313	-62.981
CAM0465	H. Goulet, A. Badiss, C. Boudeault	23-Jul-2008	Canada	Prince Edward Island			Ten Mile House, salt marsh	46.313	-62.981
CAM0464	H. Goulet, A. Badiss, C. Boudeault	23-Jul-2008	Canada	Prince Edward Island			Ten Mile House, salt marsh	46.313	-62.981
CNCHYM 01368	R. B. Madge	14-Aug-1958	Canada	Manitoba			Brandon
CNCHYM 01367	McMillan	29-Jul-1975	Canada	Ontario	St. Lawrence Islands National Park		Grenadier Island Centre
CAM0462	H. Goulet, A. Badiss, C. Boudeault	23-Jul-2008	Canada	Prince Edward Island			Ten Mile House, salt marsh	46.313	-62.981
CNCHYM 01371	J. R. Vockeroth	20-Jul-1962	United States	New York			Paul Smiths, Franklin Co.
CAM0469	H. Goulet, A. Badiss, C. Boudeault	23-Jul-2008	Canada	Prince Edward Island			Ten Mile House, salt marsh	46.313	-62.981
CNCHYM 01376		22-Jul-1972	Canada	Ontario			Aylmer West
CNCHYM 01364	W. R. M. Mason	22-Aug-1963	Canada	Ontario			Stittsville
CNCHYM 01377		31-Jul-1972	Canada	Ontario			Rondeau Prov. Pk.
CNCHYM 01378	L. Dumouchel	09-Jul-1982	Canada	Ontario	Ottawa		Mer Bleue
BIOUG01082-E12	James Sones	17-Jul-2010	Canada	Ontario	Leeds and Grenville	Elizabethtown-Kitley	4452 Rowsome Rd., Elizabethtown	44.621	-75.773	112				Google Earth	5		1	Temperate mixed forest	Malaise trap		BIOUG:Elizabethtown	July 16-18 2010
CAM0474	H. Goulet, A. Badiss, C. Boudeault	23-Jul-2008	Canada	Prince Edward Island			Ten Mile House, salt marsh	46.313	-62.981
CAM0466	H. Goulet, A. Badiss, C. Boudeault	23-Jul-2008	Canada	Prince Edward Island			Ten Mile House, salt marsh	46.313	-62.981
CAM0472	H. Goulet, A. Badiss, C. Boudeault	23-Jul-2008	Canada	Prince Edward Island			Ten Mile House, salt marsh	46.313	-62.981
CAM0467	H. Goulet, A. Badiss, C. Boudeault	23-Jul-2008	Canada	Prince Edward Island			Ten Mile House, salt marsh	46.313	-62.981
CAM0278	H. Goulet	30-May-2007	Canada	Ontario	Ottawa		Ottawa city garden	45.356	-75.707
BIOUG04442-A12	BIOBus 2012	25-Jul-2012	Canada	Alberta	Banff NP	Storm Mountain	Adjacent to train track and Bow River	51.282	-115.944	1462				GPSmap 60Cx				Forest	Sweep Net	standard 5 min sweeping (2), 4 sweepers|mostly cloudy, 25C|Low alpine steep dry slope, temperate forest	BIOUG:BANFF-NP:3
HYM00000958	Goulet & Boudrealt	05-Jul-2006	Canada	Yukon Territory			Fish Lake road	60.688	-135.238	1107
CNCH3205	Goulet & Bouderault	18-Jul-2009	United States	Alaska			Anderson, Hwy 3	64.295	-149.084	235
HYM00000818		19-Aug-2006	Canada	Manitoba	Churchill		26 km SE Churchill, Twin Lakes Burn site	58.617	-93.812	38
CNCH3212	Goulet & Bouderault	18-Jul-2009	United States	Alaska			Anderson, Hwy 3	64.295	-149.084	235
BIOUG07357-A10	Chrystal Simon	11-Jul-2013	Canada	British Columbia	10 km W Kamloops	New Afton Mine	Wetland, Site 1	50.643	-120.516	759				Google Earth (December 2013)				active mine - wetland area	Malaise Trap		BIOUG:AFTONMINE:S1
HYM00000994	Goulet & Boudrealt	16-Jul-2006	Canada	Yukon Territory			Pelly Crossing	62.831	-136.585	495
HYM00000974	Goulet & Boudrealt	08-Jul-2006	Canada	Yukon Territory			Champagne	60.79	-136.437	733
HYM00000953	Goulet & Boudrealt	15-Jul-2006	Canada	Yukon Territory			Pelly Crossing	62.831	-136.585	495
HYM00000821.2	R.Gwatkin	17-Jul-1949	Canada	Manitoba	Churchill		unspecified locality	58.74	-93.82
CNCHYM 03136	F. I. S.	07-Sep-1963	Canada	Ontario			Faleyet
HYM00000821	R.Gwatkin	17-Jul-1949	Canada	Manitoba	Churchill		unspecified locality	58.74	-93.82
HYM00000941	Goulet & Boudrealt	08-Jul-2006	Canada	Yukon Territory			Champagne	60.79	-136.437	733
CNCH3209	Goulet & Bouderault	18-Jul-2009	United States	Alaska			Anderson, Hwy 3	64.295	-149.084	235
CNCH3215	Goulet & Bouderault	22-Jul-2009	United States	Alaska			Sutton on Glen Highway	61.711	-148.91	188
CNCHYM 03143	F. I. S.	26-May-1958	Canada	British Columbia			5 Miles West of Lumby
HYM00000996	Goulet & Boudrealt	16-Jul-2006	Canada	Yukon Territory			Pelly Crossing	62.831	-136.585	495
CNCH0955	Goulet & Boudreault	20-Jul-2009	United States	Alaska			Delta Junction	64.044	-145.524	315
HYM00000948	Goulet & Boudrealt	15-Jul-2006	Canada	Yukon Territory			Pelly Crossing	62.831	-136.585	495
CNCH3208	Goulet & Bouderault	18-Jul-2009	United States	Alaska			Anderson, Hwy 3	64.295	-149.084	235
HYM00000986	Goulet & Boudrealt	08-Jul-2006	Canada	Yukon Territory			Champagne	60.79	-136.437	733
HYM00000820	J.G.Chillcot	16-Jul-1952	Canada	Manitoba	Churchill		Mile 505, Hudson Bay Railway
HYM00000971	Goulet & Boudrealt	08-Jul-2006	Canada	Yukon Territory			Champagne	60.79	-136.437	733
HYM00000955	Goulet & Boudrealt	15-Jul-2006	Canada	Yukon Territory			Pelly Crossing	62.831	-136.585	495
CNCH3306	Goulet & Bouderault	22-Jul-2009	United States	Alaska			Sutton on Glen Highway	61.711	-148.91	188
HYM00000972	Goulet & Boudrealt	08-Jul-2006	Canada	Yukon Territory			Champagne	60.79	-136.437	733
HYM00000947	Goulet & Boudrealt	15-Jul-2006	Canada	Yukon Territory			Pelly Crossing	62.831	-136.585	495
CNCH3310	Goulet & Bouderault	22-Jul-2009	United States	Alaska			Sutton on Glen Highway	61.711	-148.91	188
HYM00000931	Goulet & Boudrealt	15-Jul-2006	Canada	Yukon Territory			Pelly Crossing	62.831	-136.585	495
HYM00000985	Goulet & Boudrealt	08-Jul-2006	Canada	Yukon Territory			Champagne	60.79	-136.437	733
CNCH3203	Goulet & Bouderault	18-Jul-2009	United States	Alaska			Anderson, Hwy 3	64.295	-149.084	235
CNCHYM 03141	H. B. Poole	13-Jul-1961	United States	California			Fallen Leaf, Eldorado co.			1981.22
CNCH0995	Goulet & Boudreault	20-Jul-2009	United States	Alaska			Delta Junction	64.044	-145.524	315
HYM00000331	Boudreault & Goulet,	10-Jul-2006	Canada	Yukon Territory			Whitehorse, fallow field	60.71	-135.055	689
HYM00000939	Goulet & Boudrealt	08-Jul-2006	Canada	Yukon Territory			Champagne	60.79	-136.437	733
HYM00000969	Goulet & Boudrealt	08-Jul-2006	Canada	Yukon Territory			Champagne	60.79	-136.437	733
CNCH0993	Goulet & Boudreault	20-Jul-2009	United States	Alaska			Delta Junction	64.044	-145.524	315
CNCHYM 03145	C. M. Yoshimoto	09-Jul-1970	Canada	New Brunswick			Fredericton
HYM00000819		19-Aug-2006	Canada	Manitoba	Churchill		26 km SE Churchill, Twin Lakes Burn site	58.617	-93.812	38
CNCHYM 03138	F. I. S.	22-Jun-1962	Canada	British Columbia			Langford
CNCH3204	Goulet & Bouderault	18-Jul-2009	United States	Alaska			Anderson, Hwy 3	64.295	-149.084	235
CNCH3213	Goulet & Bouderault	18-Jul-2009	United States	Alaska			Anderson, Hwy 3	64.295	-149.084	235
BIOUG00989-E07	Alex Smith	19-Sep-2010	Canada	Ontario	Haldimond-Dunn Townline	Windy Bluff		42.861	-79.703	179				GPS
BIOUG03931-A10	H.Brown	07-Sep-2012	Canada	Ontario	Point Pelee NP	Cactus Field		41.939	-82.516	168				GPS			4	Mixed Habitat	Malaise Trap	Malaise Trap||Cedar / Savannah	BIOUG:PELEE-NP	TRAP;Sept 5-12
CNCH0965	Goulet & Boudreault	20-Jul-2009	United States	Alaska			Delta Junction	64.044	-145.524	315
HYM00001322	Goulet, Boudreault & Fernandez	04-Jun-2007	Canada	Saskatchewan			Grassland National Park	49.074	-106.529	830
CAM0437	Goulet & Fernandez	29-May-2008	Canada	Ontario	Almonte		5 km NW of Almonte, Hwy 49, Burnt Land, Alvar Prov. Park	45.255	-76.14
HYM00000990	Goulet & Boudrealt	15-Jul-2006	Canada	Yukon Territory			Pelly Crossing	62.831	-136.585	495
CNCHYM 03139	F. I. S.	03-Aug-1962	Canada	Ontario			Macdiarmid
HYM00000975	Goulet & Boudrealt	08-Jul-2006	Canada	Yukon Territory			Champagne	60.79	-136.437	733
CNCH3206	Goulet & Bouderault	18-Jul-2009	United States	Alaska			Anderson, Hwy 3	64.295	-149.084	235
HYM00000935	Goulet & Boudrealt	15-Jul-2006	Canada	Yukon Territory			Pelly Crossing	62.831	-136.585	495
CNCH1008	Goulet & Boudreault	20-Jul-2009	United States	Alaska			Delta Junction	64.044	-145.524	315
HYM00000987	Goulet & Boudrealt	08-Jul-2006	Canada	Yukon Territory			Champagne	60.79	-136.437	733
CNCH0987	Goulet & Boudreault	20-Jul-2009	United States	Alaska			Delta Junction	64.044	-145.524	315
08BBHYM-1368	J.Cossey, N.Jeffery, J.Straka	16-Jul-2008	Canada	Saskatchewan	Grasslands NP	East Block badlands		49.071	-106.531	848								Riparian Zone	Sweep Net	Daytime netting||Ranch creek side grass
HYM00000968	Goulet & Boudrealt	08-Jul-2006	Canada	Yukon Territory			Champagne	60.79	-136.437	733
CNCHYM 03144		01-Dec-1944	United States	California			Los Angeles
HYM00000936	Goulet & Boudrealt	15-Jul-2006	Canada	Yukon Territory			Pelly Crossing	62.831	-136.585	495
HYM00000951	Goulet & Boudrealt	15-Jul-2006	Canada	Yukon Territory			Pelly Crossing	62.831	-136.585	495
HYM00001320	Goulet, Boudreault & Fernandez	04-Jun-2007	Canada	Saskatchewan			Grassland National Park	49.074	-106.529	830
HYM00000920		17-Aug-2006	Canada	Manitoba	Churchill		26 km SE Churchill, Twin Lakes Burn site	58.617	-93.812	38
CNCHYM 03137		03-Aug-1971	Canada	Ontario			Hearst
HYM00000820.2	J.G.Chillcot	16-Jul-1952	Canada	Manitoba	Churchill		Mile 505, Hudson Bay Railway
HYM00000976	Goulet & Boudrealt	08-Jul-2006	Canada	Yukon Territory			Champagne	60.79	-136.437	733
HYM00000943	Goulet & Boudrealt	08-Jul-2006	Canada	Yukon Territory			Champagne	60.79	-136.437	733
HYM00000934	Goulet & Boudrealt	15-Jul-2006	Canada	Yukon Territory			Pelly Crossing	62.831	-136.585	495
HYM00000938	Goulet & Boudrealt	08-Jul-2006	Canada	Yukon Territory			Champagne	60.79	-136.437	733
HYM00000950	Goulet & Boudrealt	15-Jul-2006	Canada	Yukon Territory			Pelly Crossing	62.831	-136.585	495
HYM00000956	Goulet & Boudrealt	08-Jul-2006	Canada	Yukon Territory			Champagne	60.79	-136.437	733
HYM00000973	Goulet & Boudrealt	08-Jul-2006	Canada	Yukon Territory			Champagne	60.79	-136.437	733
HYM00000970	Goulet & Boudrealt	08-Jul-2006	Canada	Yukon Territory			Champagne	60.79	-136.437	733
HYM00000940	Goulet & Boudrealt	08-Jul-2006	Canada	Yukon Territory			Champagne	60.79	-136.437	733
CNCHYM 03142	J. F. McAlpine	20-Jul-1967	Canada	Newfoundland and Labrador			Agric.Exp.Sta.St.John`s
HYM00000942	Goulet & Boudrealt	08-Jul-2006	Canada	Yukon Territory			Champagne	60.79	-136.437	733
CNCHYM 03140	B. Poole	15-Aug-1961	United States	Colorado			Muddy Pass Jackson Co.			2682.27
07PROBE-20072	A.Renaud	07-Jul-2007	Canada	Manitoba	Churchill	26 km SE Churchill, Twin Lakes		58.632	-93.788												BIOUG:Churchill
CNCHYM 03217	S. M. Clark	09-Aug-1961	United States	Colorado			Doolittle Ranch Mt. Evans			2987.08
HYM00000806	J.G.Chillcot	18-Jul-1952	Canada	Manitoba	Churchill		23 km E Churchill, Fort Churchill	58.734	-93.789	27
07PROBE-22423	A.Renaud	16-Jul-2007	Canada	Manitoba	Churchill		23 km E Churchill, Ramsay Creek	58.731	-93.78	10											BIOUG:Churchill
BIOUG14184-G04	BIObus 2013	19-Jul-2013	Canada	Newfoundland and Labrador	Gros Morne NP	Lomond River Trail	Balsam fir, larch, fern and wildflowers (Ladyslipper orchid)	49.429	-57.741	35				GPSmap 60Cx
HYM00000809.2	J. G. Chillcot	11-Jul-1952	Canada	Manitoba	Churchill		Fort Churchill	58.734	-93.82
10PROBE-29276	Brandon Laforest	19-Jul-2010	Canada	Manitoba	Churchill	12 km ESE Churchill, Launch Road	Launch road Fen	58.754	-93.998					GPS, WGS84					Sweep Net		BIOUG:Churchill
HYM00000798	J.G.Chillcot	07-Aug-1952	Canada	Manitoba	Churchill		23 km E Churchill, Fort Churchill	58.734	-93.789	27
CAM0958	H. Goulet, A. Badiss, C. Boudeault	11-Jul-2008	Canada	Newfoundland and Labrador	Cap St-George		Cap St-George, fallowfield & coastal tundra	48.466	-59.26
HYM00000981	Goulet & Boudrealt	06-Jul-2006	Canada	Yukon Territory			Tahkini River road	60.875	-135.386	693
BIOUG03191-A01	Stephanie Church	10-Jun-2012	Canada	Alberta	Elk Island NP	penninsula in Astotin Lake	The Point near administration/warden office	53.685	-112.86	719				GPS			4	Forest	Malaise Trap	||emergent white birch/willow/trembling aspen	BIOUG:ELKISL-NP:1
HYM00000792.2	J. G. Chillcot	21-Jul-1952	Canada	Manitoba	Churchill		Fort Churchill	58.734	-93.82
CAM0427	Goulet & Fernandez	29-May-2008	Canada	Ontario	Almonte		5 km NW of Almonte, Hwy 49, Burnt Land, Alvar Prov. Park	45.255	-76.14
HYM00000795	J.G.Chillcot	21-Jun-1952	Canada	Manitoba	Churchill		23 km E Churchill, Fort Churchill	58.734	-93.789	27
HYM00000813	J.G.Chillcot	07-Nov-1952	Canada	Manitoba	Churchill		23 km E Churchill, Fort Churchill	58.734	-93.789	27
GOU 0582	J. Fernandez	02-Aug-2009	Canada	Nova Scotia			Kejimkujik National Park, Peter`s Point	44.366	-65.196
07PROBE-23399	A.Renaud	23-Jul-2007	Canada	Manitoba	Churchill	23 km E Churchill, Ramsay Creek		58.731	-93.78	10											BIOUG:Churchill
HYM00000922	J.G.Chillcot	11-Jul-1952	Canada	Manitoba	Churchill		23 km E Churchill, Fort Churchill	58.734	-93.789	27
CAM0412	Goulet, Boudreault & Fernandez	04-Jun-2008	Canada	Ontario	Manitoulin Island		Little Current prairie Alvar	45.975	-81.904
07PROBE-23413	A.Renaud	23-Jul-2007	Canada	Manitoba	Churchill	23 km E Churchill, Ramsay Creek		58.731	-93.78	10											BIOUG:Churchill
10BBCHY-2887	BIObus 2010	21-Jul-2010	Canada	British Columbia	Yoho NP	Kicking Horse Cmpgrd.	Amphitheatre flowered meadow	51.424	-116.429	1317				GPS WGS84			2	Grassland	Malaise Trap	Malaise Trap||Meadow
CAM0422	Goulet & Fernandez	29-May-2008	Canada	Ontario	Almonte		5 km NW of Almonte, Hwy 49, Burnt Land, Alvar Prov. Park	45.255	-76.14
HYM00000945	Goulet & Boudrealt	15-Jul-2006	Canada	Yukon Territory			Pelly Crossing	62.831	-136.585	495
HYM00000814.2	J.G.Chillcot	21-Jul-1952	Canada	Manitoba	Churchill		23 km E Churchill, Fort Churchill	58.734	-93.789	27
CAM0435	Goulet & Fernandez	29-May-2008	Canada	Ontario	Almonte		5 km NW of Almonte, Hwy 49, Burnt Land, Alvar Prov. Park	45.255	-76.14
HYM00000801	J.G.Chillcot	07-Aug-1952	Canada	Manitoba	Churchill		23 km E Churchill, Fort Churchill	58.734	-93.789	27
CAM0959	H. Goulet, A. Badiss, C. Boudeault	11-Jul-2008	Canada	Newfoundland and Labrador	Cap St-George		Cap St-George, fallowfield & coastal tundra	48.466	-59.26
HYM00000964	Goulet & Boudrealt	06-Jul-2006	Canada	Yukon Territory			Tahkini River road	60.875	-135.386	693
HYM00000794	J.G.Chillcot	16-Jul-1952	Canada	Manitoba	Churchill		23 km E Churchill, Fort Churchill	58.734	-93.789	27
07PROBE-22417	A.Renaud	16-Jul-2007	Canada	Manitoba	Churchill	23 km E Churchill, Ramsay Creek		58.731	-93.78	10											BIOUG:Churchill
GOU 0590	J. Fernandez	02-Aug-2009	Canada	Nova Scotia			Kejimkujik National Park, Peter`s Point	44.366	-65.196
CAM0936	H. Goulet, A. Badiss, C. Boudeault	16-Jul-2008	Canada	Newfoundland and Labrador	Plum Point		Plum Point, fallow field	51.064	-56.982
07PROBE-20806	A.Renaud	21-Jul-2007	Canada	Manitoba	Churchill	23 km E Churchill, Ramsay Creek		58.731	-93.78	10											BIOUG:Churchill
CAM0434	Goulet & Fernandez	29-May-2008	Canada	Ontario	Almonte		5 km NW of Almonte, Hwy 49, Burnt Land, Alvar Prov. Park	45.255	-76.14
CAM0948	H. Goulet, A. Badiss, C. Boudeault	13-Jul-2008	Canada	Newfoundland and Labrador	Sally`s Cove		Sally`s Cove, fallow field	49.739	-57.925
HYM00000802	J.G.Chillcot	04-Aug-1952	Canada	Manitoba	Churchill		23 km E Churchill, Fort Churchill	58.734	-93.789	27
HYM00001682	Goulet & Boudreault	05-Jul-2006	Canada	Yukon Territory			Fish Lake Rd	60.686	-135.236	1107
CAM0421	Goulet & Fernandez	29-May-2008	Canada	Ontario	Almonte		5 km NW of Almonte, Hwy 49, Burnt Land, Alvar Prov. Park	45.255	-76.14
CAM0416	Goulet & Fernandez	29-May-2008	Canada	Ontario	Almonte		5 km NW of Almonte, Hwy 49, Burnt Land, Alvar Prov. Park	45.255	-76.14
HYM00000815	J.G.Chillcot	01-Jan-1952	Canada	Manitoba	Churchill		23 km E Churchill, Fort Churchill	58.734	-93.789	27
CAM0428	Goulet & Fernandez	29-May-2008	Canada	Ontario	Almonte		5 km NW of Almonte, Hwy 49, Burnt Land, Alvar Prov. Park	45.255	-76.14
HYM00000816	J.G.Chillcot	08-May-1952	Canada	Manitoba	Churchill		Warkworth Creek nr. Churchill	58.7	-94.1
07PROBE-20818	A.Renaud	21-Jul-2007	Canada	Manitoba	Churchill	23 km E Churchill, Ramsay Creek		58.731	-93.78	10											BIOUG:Churchill
CAM0386	Goulet, Boudreault & Fernandez	04-Jun-2008	Canada	Ontario	Manitoulin Island		Little Current prairie Alvar	45.975	-81.904
CAM0387	Goulet, Boudreault & Fernandez	04-Jun-2008	Canada	Ontario	Manitoulin Island		Little Current prairie Alvar	45.975	-81.904
CAM0944	H. Goulet, A. Badiss, C. Boudeault	13-Jul-2008	Canada	Newfoundland and Labrador	Sally`s Cove		Sally`s Cove, fallow field	49.739	-57.925
CNCHYM 03216	B. H. Poole	31-May-1961	United States	Colorado			Boulder			1828.82
CAM0952	H. Goulet, A. Badiss, C. Boudeault	10-Jul-2008	Canada	Newfoundland and Labrador	South Branch		South Branch, fallow field	47.922	-59.014
HYM00000815.2	J.G.Chillcot	01-Jul-1952	Canada	Manitoba	Churchill		23 km E Churchill, Fort Churchill	58.734	-93.789	27
CAM0426	Goulet & Fernandez	29-May-2008	Canada	Ontario	Almonte		5 km NW of Almonte, Hwy 49, Burnt Land, Alvar Prov. Park	45.255	-76.14
10PROBE-28643	Brandon Laforest	16-Jul-2010	Canada	Manitoba	Churchill	11 km S Churchill, Goose Creek	Goose Creek Second Train Tracks	58.718	-94.122					GPS, WGS84					Sweeping		BIOUG:Churchill
HYM00000811.2	J.G.Chillcot	11-Jul-1952	Canada	Manitoba	Churchill		23 km E Churchill, Fort Churchill	58.734	-93.789	27
CAM0492	H. Goulet, A. Badiss, C. Boudeault	13-Jul-2008	Canada	Newfoundland and Labrador			Sally`s Cove, fallow field	49.739	-57.925
CAM0945	H. Goulet, A. Badiss, C. Boudeault	13-Jul-2008	Canada	Newfoundland and Labrador	Sally`s Cove		Sally`s Cove, fallow field	49.739	-57.925
HYM00000603	Goulet & Boudrealt	05-Jul-2006	Canada	Yukon Territory			Fish Lake road	60.688	-135.238	1107
CAM0951	H. Goulet, A. Badiss, C. Boudeault	16-Jul-2008	Canada	Newfoundland and Labrador	Plum Point		Plum Point, fallow field	51.064	-56.982
HYM00000989	Goulet & Boudrealt	05-Jul-2006	Canada	Yukon Territory			Fish Lake road	60.688	-135.238	1107
MIC 000900	H. Goulet, A. Badiss, C. Boudeault	13-Jul-2008	Canada	Newfoundland and Labrador			Sally`s Cove, fallow field	49.739	-57.925
07PROBE-20808	A.Renaud	21-Jul-2007	Canada	Manitoba	Churchill	23 km E Churchill, Ramsay Creek		58.731	-93.78	10											BIOUG:Churchill
CAM0365	Goulet & Fernandez	29-May-2008	Canada	Ontario	Almonte		5 km NW of Almonte, Hwy 49, Burnt Land, Alvar Prov. Park	45.255	-76.14
CAM0384	Goulet, Boudreault & Fernandez	04-Jun-2008	Canada	Ontario	Manitoulin Island		Little Current, prairie alvar	45.975	-81.904
CAM0431	Goulet & Fernandez	29-May-2008	Canada	Ontario	Almonte		5 km NW of Almonte, Hwy 49, Burnt Land, Alvar Prov. Park	45.255	-76.14
CNCHYM 03218	Becker, Munroe, Mason	02-Aug-1954	United States	New Hampshire			Mt. Washington, Cow Pasture Toll Rd			1737.38
MIC 000721	H. Goulet, A. Badiss, C. Boudeault	24-Jul-2008	Canada	New Brunswick			vic. Tracy, fallow field	45.759	-66.676
HYM00000803	J.G.Chillcot	11-Jul-1952	Canada	Manitoba	Churchill		23 km E Churchill, Fort Churchill	58.734	-93.789	27
GOU 0589	J. Fernandez	02-Aug-2009	Canada	Nova Scotia			Kejimkujik National Park, Peter`s Point	44.366	-65.196
HYM00000813.2	J.G.Chillcot	11-Jul-1952	Canada	Manitoba	Churchill		23 km E Churchill, Fort Churchill	58.734	-93.789	27
CAM0488	H. Goulet, A. Badiss, C. Boudeault	13-Jul-2008	Canada	Newfoundland and Labrador			Sally`s Cove, fallow field	49.739	-57.925
HYM00000792	J.G.Chillcot	21-Jul-1952	Canada	Manitoba	Churchill		23 km E Churchill, Fort Churchill	58.734	-93.789	27
HYM00000932	Goulet & Boudrealt	15-Jul-2006	Canada	Yukon Territory			Pelly Crossing	62.831	-136.585	495
BIOUG05353-G06	BIOBus 2012	24-Jun-2012	Canada	Alberta	Waterton Lakes NP	Red Rock Parkway		49.0813	-113.879	1335				GPSmap 60Cx				Grassland	Malaise Trap	Standard 5 min sweeping (2), 4 sweepers|Sunny with some cloud cover, 18 degree celsius|Moraine grassland	BIOUG:WATERTON-NP:3
HYM00001312	Goulet & Boudreault	15-Jun-2007	Canada	Manitoba			N of Ashville, Hwy 10	51.795	-100.106	335
MIC 000350	G. Shewell	04-Jul-1966	Canada	Northwest Territories			Ford Lake	63.11	-107.19
HYM00000982	Goulet & Boudrealt	06-Jul-2006	Canada	Yukon Territory			Tahkini River road	60.875	-135.386	693
10BBCHY-2879	BIObus 2010	21-Jul-2010	Canada	British Columbia	Yoho NP	Kicking Horse Cmpgrd.	Amphitheatre flowered meadow	51.424	-116.429	1317				GPS WGS84			2	Grassland	Malaise Trap	Malaise Trap||Meadow
09BBEHY-1128	BIObus 2009	14-Jul-2009	Canada	Newfoundland and Labrador	Gros Morne NP	Western Brook Pond	Hiking Trail	49.787	-57.869	27
HYM00000944	Goulet & Boudrealt	15-Jul-2006	Canada	Yukon Territory			Pelly Crossing	62.831	-136.585	495
HYM00001329	Goulet, Boudreault & Fernandez	02-Jun-2007	Canada	Saskatchewan			N of Rocanville, Qu`Appelle R.	50.508	-101.742	454
09PROBE-A0342	J.M.Cumming	31-Jul-2009	Canada	Manitoba	Churchill	10 km E Churchill, Launch Road		58.7543	-93.9968	20									Malaise Trap		BIOUG:Churchill
HYM00000804	J.G.Chillcot	21-Jul-1952	Canada	Manitoba	Churchill		23 km E Churchill, Fort Churchill	58.734	-93.789	27
07PROBE-24572	A. Renaud	17-Jul-2007	Canada	Manitoba	Churchill	10 km SE Churchill, Farnworth Lake		58.705	-94.052	14
CAM0415	Goulet & Fernandez	29-May-2008	Canada	Ontario	Almonte		5 km NW of Almonte, Hwy 49, Burnt Land, Alvar Prov. Park	45.255	-76.14
MIC 000723	H. Goulet, A. Badiss, C. Boudeault	24-Jul-2008	Canada	New Brunswick			vic. Tracy, fallow field	45.759	-66.676
HYM00000793.2	J.G.Chillcot	21-Jul-1952	Canada	Manitoba	Churchill		23 km E Churchill, Fort Churchill	58.734	-93.789	27
HYM00000812	J.G.Chillcot	07-Nov-1952	Canada	Manitoba	Churchill		23 km E Churchill, Fort Churchill	58.734	-93.789	27
HYM00000796	J.G.Chillcot	14-Jul-1952	Canada	Manitoba	Churchill		23 km E Churchill, Fort Churchill	58.734	-93.789	27
HYM00000797	J.G.Chillcot	11-Jul-1952	Canada	Manitoba	Churchill		23 km E Churchill, Fort Churchill	58.734	-93.789	27
CAM0417	Goulet & Fernandez	29-May-2008	Canada	Ontario	Almonte		5 km NW of Almonte, Hwy 49, Burnt Land, Alvar Prov. Park	45.255	-76.14
07PROBE-20789	A.Renaud	21-Jul-2007	Canada	Manitoba	Churchill	23 km E Churchill, Ramsay Creek		58.731	-93.78	10											BIOUG:Churchill
GOU 0588	J. Fernandez	02-Aug-2009	Canada	Nova Scotia			Kejimkujik National Park, Peter`s Point	44.366	-65.196
CAM0403	Boudreault, Goulet & Fernandez	03-Jun-2008	Canada	Ontario	Manitoulin Island		Misery Bay Prov. Park	45.792	-82.75	185
MIC 000722	H. Goulet, A. Badiss, C. Boudeault	24-Jul-2008	Canada	New Brunswick			vic. Tracy, fallow field	45.759	-66.676
CAM0419	Goulet & Fernandez	29-May-2008	Canada	Ontario	Almonte		5 km NW of Almonte, Hwy 49, Burnt Land, Alvar Prov. Park	45.255	-76.14
CAM0414	Goulet & Fernandez	29-May-2008	Canada	Ontario	Almonte		5 km NW of Almonte, Hwy 49, Burnt Land, Alvar Prov. Park	45.255	-76.14
BIOUG03882-B11	Roberta Tesar	23-Jul-2012	Canada	Manitoba	Riding Mountain NP			50.676	-99.898	663							3	Forest	Malaise Trap	Malaise Trap||Mixed wood, medium stage aspen stand	BIOUG:RIDING-NP
HYM00000810	J.G.Chillcot	24-Jul-1952	Canada	Manitoba	Churchill		23 km E Churchill, Fort Churchill	58.734	-93.789	27
BIOUG07032-G03	Thousand Islands NP	02-Jul-2012	Canada	Ontario	Thousand Islands NP	Jones Creek by Mallorytown, County Rd. 5		44.475	-75.865	117				GPS			4	Forest	Malaise Trap	Malaise Trap||Sugar maple and white birch	BIOUG:STLAW-NP
CAM0430	Goulet & Fernandez	29-May-2008	Canada	Ontario	Almonte		5 km NW of Almonte, Hwy 49, Burnt Land, Alvar Prov. Park	45.255	-76.14
HYM00000800	J.G.Chillcot	30-Jul-1952	Canada	Manitoba	Churchill		23 km E Churchill, Fort Churchill	58.734	-93.789	27
CAM0418	Goulet & Fernandez	29-May-2008	Canada	Ontario	Almonte		5 km NW of Almonte, Hwy 49, Burnt Land, Alvar Prov. Park	45.255	-76.14
MIC 000923	H. Goulet, A. Badiss, C. Boudeault	11-Jul-2008	Canada	Newfoundland and Labrador			Cap St-George, fallow field	48.466	-59.26
CAM0383	Boudreault, Goulet & Fernandez	03-Jun-2008	Canada	Ontario	Manitoulin Island		Misery Bay Prov. Park	45.792	-82.75	185
HYM00000793	J.G.Chillcot	01-Jan-1952	Canada	Manitoba	Churchill		23 km E Churchill, Fort Churchill	58.734	-93.789	27
HYM00000808	J.G.Chillcot	18-Jul-1952	Canada	Manitoba	Churchill		23 km E Churchill, Fort Churchill	58.734	-93.789	27
HYM00000962	Goulet & Boudrealt	06-Jul-2006	Canada	Yukon Territory			Tahkini River road	60.875	-135.386	693
HYM00000814	J.G.Chillcot	21-Jul-1952	Canada	Manitoba	Churchill		23 km E Churchill, Fort Churchill	58.734	-93.789	27
CAM0953	H. Goulet, A. Badiss, C. Boudeault	10-Jul-2008	Canada	Newfoundland and Labrador	St-David`s		St-David`s, fallow field	48.205	-58.866
HYM00000604	Goulet & Boudrealt	05-Jul-2006	Canada	Yukon Territory			Fish Lake road	60.688	-135.238	1107
CAM0429	Goulet & Fernandez	29-May-2008	Canada	Ontario	Almonte		5 km NW of Almonte, Hwy 49, Burnt Land, Alvar Prov. Park	45.255	-76.14
CAM0382	Boudreault, Goulet & Fernandez	03-Jun-2008	Canada	Ontario	Manitoulin Island		Misery Bay Prov. Park	45.792	-82.75	185
CAM0385	Goulet, Boudreault & Fernandez	04-Jun-2008	Canada	Ontario	Manitoulin Island		Little Current prairie Alvar	45.975	-81.904
08BBHYM-1493	BIObus 2008	29-Jul-2008	Canada	Alberta	Banff NP	Sunshine Highway		51.126	-115.726	1614								Grassland	Sweep Net	||Avalanche meadow, montane
CAM0438	Goulet & Fernandez	29-May-2008	Canada	Ontario	Almonte		5 km NW of Almonte, Hwy 49, Burnt Land, Alvar Prov. Park	45.255	-76.14
CAM0423	Goulet & Fernandez	29-May-2008	Canada	Ontario	Almonte		5 km NW of Almonte, Hwy 49, Burnt Land, Alvar Prov. Park	45.255	-76.14
BIOUG03593-B08	Melanie, Roberta Tesar	09-Jul-2012	Canada	Manitoba	Riding Mountain NP			50.676	-99.898	663							3	Forest	Malaise Trap	Malaise Trap||Mixed wood, medium stage aspen stand	BIOUG:RIDING-NP
HYM00000767	J.G.Chillcot	21-Jun-1952	Canada	Manitoba	Churchill		23 km E Churchill, Fort Churchill	58.734	-93.789	27
HYM00000817	J.G.Chillcot	09-Jul-1952	Canada	Manitoba	Churchill		23 km E Churchill, Fort Churchill	58.734	-93.789	27
HYM00000805	J.G.Chillcot	16-Jul-1952	Canada	Manitoba	Churchill		23 km E Churchill, Fort Churchill	58.734	-93.789	27
HYM00000809	J.G.Chillcot	07-Nov-1952	Canada	Manitoba	Churchill		23 km E Churchill, Fort Churchill	58.734	-93.789	27
HYM00000811	J.G.Chillcot	07-Dec-1952	Canada	Manitoba	Churchill		23 km E Churchill, Fort Churchill	58.734	-93.789	27
CAM0432	Goulet & Fernandez	29-May-2008	Canada	Ontario	Almonte		5 km NW of Almonte, Hwy 49, Burnt Land, Alvar Prov. Park	45.255	-76.14
HYM00000921	J.G.Chillcot	28-Jul-1952	Canada	Manitoba	Churchill		23 km E Churchill, Fort Churchill	58.734	-93.789	27
MIC 000909	H. Goulet, A. Badiss, C. Boudeault	16-Jul-2008	Canada	Newfoundland and Labrador			Plum Point, fallow field	51.064	-56.848
CAM0957	H. Goulet, A. Badiss, C. Boudeault	10-Jul-2008	Canada	Newfoundland and Labrador	St-David`s		St-David`s, fallow field	48.205	-58.866
CAM0955	H. Goulet, A. Badiss, C. Boudeault	13-Jul-2008	Canada	Newfoundland and Labrador	Sally`s Cove		Sally`s Cove, fallow field	49.739	-57.925
HYM00000799	J.G.Chillcot	11-Jul-1952	Canada	Manitoba	Churchill		23 km E Churchill, Fort Churchill	58.734	-93.789	27
HYM00000921.2	J. G. Chillcot	28-Jul-1952	Canada	Manitoba	Churchill		Fort Churchill	58.734	-93.82
HYM00000807	J.G.Chillcot	23-Jul-1952	Canada	Manitoba	Churchill		23 km E Churchill, Fort Churchill	58.734	-93.789	27
