# Supplementary material for: Streamlining the use of BOLD specimen data to record species distributions: a case study with ten Nearctic species of Microgastrinae (Hymenoptera: Braconidae)
Source: Biodivers Data J. 2014 Oct 29;(2):e4153. doi: 10.3897/BDJ.2.e4153 (PMC4251541; doi:10.3897/BDJ.2.e4153)
Supplement: Supplementary material 2 — Supplemental Appendix 2 [file biodiversity_data_journal-2-e4153-s002.xls]

## Sheet: Taxa
Taxon_Local_ID	Kingdom	Subkingdom	Phylum	Subphylum	Superclass	Class	Subclass	Superorder	Order	Suborder	Infraorder	Superfamily	Family	Subfamily	Tribe	Subtribe	Genus	Subgenus	Species	Subspecies	Variety	Form	Authorship	Nomenclature	Feeds on	Symbiotic with	Parasite of	Host of	Native Status	Conservation Status	Distribution	Horizon	Notes
1	Animalia		Arthropoda			Insecta			Hymenoptera				Braconida	Microgastrinae			Apanteles		carpatus				(Say, 1836)										This species was recorded from three provinces in Canada (BC, NB, ON) by Fernandez-Triana (2010), but no locality records were provided. Here we present new details about the distribution of this species in Canada, based on examined specimens from the BIO and CNC collections. Data for those specimens was extracted from BOLD.
2	Animalia		Arthropoda			Insecta			Hymenoptera				Braconida	Microgastrinae			Apanteles		conanchetorum				Viereck, 1917										This species was recorded from two provinces in Canada (NS, ON) by Fernandez-Triana (2010), but no locality records were provided. Here we present new information about the distribution of this species in Canada, including five new provincial records (AB, NL, PE, QC, SK), based on examined specimens from the BIO and CNC collections. Data for those specimens was extracted from BOLD.
3	Animalia		Arthropoda			Insecta			Hymenoptera				Braconida	Microgastrinae			Apanteles		ensiger				(Say, 1836)										This species was recorded from four provinces in Canada (MB, NS, ON, QC) by Fernandez-Triana (2010), but no locality records were provided. Recently four more Canadian provinces and territories (AB, NB, NT, SK) and one state (AK) from the United States were added (Fernandez-Triana et al. 2014). Here we present new information about the distribution of this species in the Nearctic, including two n…
4	Animalia		Arthropoda			Insecta			Hymenoptera				Braconida	Microgastrinae			Apanteles		sodalis				(Haliday, 1834)										This species was recorded from three provinces in Canada (BC, NB, NL) by Fernandez-Triana (2010), but no locality records were provided. Here we present new information about the distribution of this species in Canada, based on examined specimens from the BIO and CNC collections. Data for those specimens was extracted from BOLD.
5	Animalia		Arthropoda			Insecta			Hymenoptera				Braconida	Microgastrinae			Apanteles		xanthostigma				(Haliday, 1834)										This species was recorded from three provinces in Canada (BC, NB, NL) by Fernandez-Triana et al. (2014). A new province (NL) is added here, together with information about the distribution of this species in Canada, based on examined specimens from the BIO and CNC collections. Data for those specimens was extracted from BOLD.
6	Animalia		Arthropoda			Insecta			Hymenoptera				Braconida	Microgastrinae			Cotesia		crambi				(Weed, 1887)										This species was recorded from Canada from only two localities in ON and QC (Fernandez-Triana, 2010; Fernandez-Triana et al. 2014). Here we present new and detailed information about three new localities in ON, based on examined specimens from the BIO and CNC collections. Data for those specimens was extracted from BOLD.
7	Animalia		Arthropoda			Insecta			Hymenoptera				Braconida	Microgastrinae			Dolichogenidea		longicauda				(Wesmael, 1837)										This species was recorded from one province in Canada (BC) by Fernandez-Triana (2010) and Fernandez-Triana & Huber (2010), but no locality records were provided. Here we present new information about the distribution of this species in Canada (BC), as well as the first record of this species from the United States (WA) based on examined specimens from the BIO and CNC collections. Data for those s…
8	Animalia		Arthropoda			Insecta			Hymenoptera				Braconida	Microgastrinae			Hygroplitis		melligaster				(Provancher, 1886)										This species was recorded from five provinces in Canada (MB, NB, NS, ON, QC) by Fernandez-Triana (2010), but no locality records were provided. Here we present new information about the distribution of this species in Canada, including one new province (PE), based on examined specimens from the BIO and CNC collections. Data for those specimens was extracted from BOLD.
9	Animalia		Arthropoda			Insecta			Hymenoptera				Braconida	Microgastrinae			Pholetesor		bedelliae				(Viereck, 1911)										This species is widely distributed within the Nearctic (e.g., Whitfield 2006, Fernandez-Triana 2010, Fernandez-Triana et al. 2014). Here we present new information about the distribution of this species in Canada, including one new province (AB), based on examined specimens from the BIO and CNC collections. Data for those specimens was extracted from BOLD.
10	Animalia		Arthropoda			Insecta			Hymenoptera				Braconida	Microgastrinae			Pholetesor		viminetorum				(Wesmael, 1837)										This species is widely distributed within the Nearctic (e.g., Whitfield 2006, Fernandez-Triana 2010, Fernandez-Triana et al. 2014). Here we present new and detailed information about the distribution of the species in Canada, including one new province (ON), based on examined specimens from the BIO and CNC collections. Data for those specimens was extracted from BOLD.

## Sheet: Materials
Taxon_Local_ID	typeStatus	catalogNumber	occurrenceDetails	occurrenceRemarks	recordNumber	recordedBy	individualID	individualCount	sex	lifeStage	reproductiveCondition	behavior	establishmentMeans	occurrenceStatus	preparations	disposition	otherCatalogNumbers	previousIdentifications	associatedMedia	associatedReferences	associatedOccurrences	associatedSequences	taxonID	scientificNameID	acceptedNameUsageID	parentNameUsageID	originalNameUsageID	nameAccordingToID	namePublishedInID	taxonConceptID	scientificName	acceptedNameUsage	parentNameUsage	originalNameUsage	nameAccordingTo	namePublishedIn	higherClassification	kingdom	phylum	class	order	family	genus	subgenus	specificEpithet	infraspecificEpithet	taxonRank	verbatimTaxonRank	scientificNameAuthorship
1	Other material	CAM0023				H. Goulet				Adult							CNCHZ213-09
1	Other material	BIOUG01088-A03				James Sones				Adult							JSHYO003-11
1	Other material	CAM0036				H. Goulet				Adult							CNCHZ226-09
1	Other material	MIC 000034				Dom. Par. Lab.			Female	Adult							MHABR034-09
1	Other material	MIC 000041				N. C. D. A			Male	Adult							MHABR041-09
1	Other material	MIC 000036				Phillips			Female	Adult							MHABR036-09
1	Other material	BIOUG01631-B09				James Sones				Adult							JSAUG1452-11
1	Other material	CAM0104				H. Goulet				Adult							CNCHZ294-09
1	Other material	MIC 000035				J. Vockeroth			Female	Adult							MHABR035-09
1	Other material	CNCHYM 00081				N. C. D. A				Adult							HYCND1790-11
1	Other material	CAM0117				H. Goulet				Adult							CNCHZ307-09
1	Other material	CAM0021				H. Goulet				Adult							CNCHZ211-09
1	Other material	CAM0046				H. Goulet				Adult							CNCHZ236-09
1	Other material	MIC 000040				N. C. D. A			Male	Adult							MHABR040-09
1	Other material	CAM0053				H. Goulet				Adult							CNCHZ243-09
1	Other material	CAM0063				H. Goulet				Adult							CNCHZ253-09
1	Other material	CAM0020				H. Goulet				Adult							CNCHZ210-09
1	Other material	CAM0058				H. Goulet				Adult							CNCHZ248-09
1	Other material	CAM0026				H. Goulet				Adult							CNCHZ216-09
1	Other material	CAM0049				H. Goulet				Adult							CNCHZ239-09
1	Other material	MIC 000037				D. Finnamore			Female	Adult							MHABR037-09
1	Other material	MIC 000033				C. Twinn			Female	Adult							MHABR033-09
1	Other material	MIC 000038							Female	Adult							MHABR038-09
1	Other material	CAM0042				H. Goulet				Adult							CNCHZ232-09
2	Other material	CNCHYM 00088				N. C. D. A				Adult							HYCND1797-11
2	Other material	MIC 000908				H. Goulet, A. Badiss, C. Boudeault				Adult							CNCHZ1100-09
2	Other material	BIOUG10353-H05				F.Tremblay				Adult							CNFNF286-14
2	Other material	MIC 000905				H. Goulet, A. Badiss, C. Boudeault				Adult							CNCHZ1097-09
2	Other material	BIOUG00989-E12				Alex Smith				Adult							ASGLF313-11
2	Other material	BIOUG01252-E11				James Sones				Adult							JSHYO534-11
2	Other material	BIOUG07019-B11				Cyndi Smith				Adult							CNWLM799-13
2	Other material	BIOUG10403-A09				F.Tremblay				Adult							CNFNF871-14
2	Other material	MIC 000063							Female	Adult							MHABR063-09
2	Other material	BIOUG10360-E02				F.Tremblay				Adult							CNFNF627-14
2	Other material	BIOUG10358-C12				F.Tremblay				Adult							CNFNF423-14
2	Other material	BIOUG00989-F01				Alex Smith				Adult							ASGLF314-11
2	Other material	BIOUG11905-C04				F.Tremblay				Adult							CNFNR2363-14
2	Other material	MIC 000902				H. Goulet, A. Badiss, C. Boudeault				Adult							CNCHZ1094-09
2	Other material	MIC 000058				J. McDunnough			Female	Adult							MHABR058-09
2	Other material	CAM0096				L. Masner				Adult							CNCHZ286-09
2	Other material	BIOUG11907-E10				F.Tremblay				Adult							CNFNR2583-14
2	Other material	CAM1013				H. Goulet				Adult							CNCHX143-09
2	Other material	BIOUG01631-H02				James Sones				Adult							JSSEP761-11
2	Other material	CNCHYM 00089				N. C. D. A				Adult							HYCND1798-11
2	Other material	BIOUG04245-B10				Jarret Hardisty				Adult							CNWLF652-12
2	Other material	BIOUG00989-E09				Alex Smith				Adult							ASGLF310-11
2	Other material	BIOUG11904-F02				F.Tremblay				Adult							CNFNR2302-14
2	Other material	10BBCHY-2243				BIObus 2010				Adult							BBHYK285-10
2	Other material	MIC 000600				L. Masner				Adult							CNCHZ792-09
2	Other material	PCPP10-0759				T.F.Mitterboeck, C.Vandermeer, V.Junea, C.Sobel				Adult							BBHYN214-10
2	Other material	BIOUG11909-G05				F.Tremblay				Adult							CNFNR2792-14
2	Other material	BIOUG00991-A05				Alex Smith				Adult							ASGLF353-11
2	Other material	BIOUG00914-E04				Alex Smith				Adult							ASGLF115-11
2	Other material	BIOUG00914-E03				Alex Smith				Adult							ASGLF114-11
2	Other material	BIOUG10961-E03				Paul Ayles				Adult							CNPEP1205-14
2	Other material	BIOUG08661-F09				Amy Fennell				Adult							SMTPD5714-13
2	Other material	BIOUG07067-E03				Emma Sylvester				Adult							CNWLN171-13
2	Other material	BIOUG01280-G04				James Sones				Adult							JSHYP027-11
2	Other material	CAM0160				H. Goulet				Adult							CNCHZ350-09
2	Other material	BIOUG06873-E09				Cyndi Smith				Adult							CNWLM287-13
2	Other material	BIOUG12293-G01				F.Tremblay				Adult							CNFNT1471-14
2	Other material	BIOUG10408-B06				F.Tremblay				Adult							CNFNF1260-14
2	Other material	BIOUG00989-E11				Alex Smith				Adult							ASGLF312-11
2	Other material	BIOUG10358-E06				F.Tremblay				Adult							CNFNF441-14
2	Other material	BIOUG00861-G06				Paul Hebert				Adult							PHMTX962-11
2	Other material	BIOUG10550-D04				Dany Brodeau				Adult							CNFNG557-14
2	Other material	BIOUG02507-D09				Paul Hebert				Adult							HESEP836-12
2	Other material	BIOUG10403-A08				F.Tremblay				Adult							CNFNF870-14
2	Other material	BIOUG00914-E07				Alex Smith				Adult							ASGLF118-11
2	Other material	CAM0147				H. Goulet				Adult							CNCHZ337-09
2	Other material	BIOUG00988-A09				Alex Smith				Adult							ASGLF167-11
2	Other material	BIOUG11910-C01				F.Tremblay				Adult							CNFNR2835-14
2	Other material	BIOUG04245-A01				Jarret Hardisty				Adult							CNWLF631-12
2	Other material	BIOUG00914-F08				Alex Smith				Adult							ASGLF131-11
2	Other material	BIOUG10661-F02				Dany Brodeau				Adult							CNFNG1150-14
2	Other material	BIOUG11910-B12				F.Tremblay				Adult							CNFNR2834-14
2	Other material	CNCHYM 00093								Adult							HYCND1803-11
2	Other material	CAM0005				H. Goulet				Adult							CNCHZ195-09
2	Other material	CAM0085				H. Goulet				Adult							CNCHZ275-09
2	Other material	BIOUG00989-A08				Alex Smith				Adult							ASGLF261-11
2	Other material	BIOUG08192-F10				BIOBus 2012				Adult							SSPAC3799-13
2	Other material	BIOUG01330-D09				James Sones				Adult							JSHYP661-12
2	Other material	BIOUG10353-G01				F.Tremblay				Adult							CNFNF270-14
2	Other material	BIOUG00914-G01				Alex Smith				Adult							ASGLF136-11
2	Other material	BIOUG07067-C07				Cyndi Smith				Adult							CNWLM1411-13
2	Other material	BIOUG12037-E03				F.Tremblay				Adult							CNFNS886-14
2	Other material	MIC 000061							Female	Adult							MHABR061-09
2	Other material	BIOUG00989-E10				Alex Smith				Adult							ASGLF311-11
2	Other material	BIOUG10405-G04				F.Tremblay				Adult							CNFNF1033-14
2	Other material	MIC 000060							Female	Adult							MHABR060-09
2	Other material	CAM0159				H. Goulet				Adult							CNCHZ349-09
2	Other material	BIOUG13530-A05				BIObus 2013				Adult							SSROB2643-14
2	Other material	BIOUG00914-F06				Alex Smith				Adult							ASGLF129-11
2	Other material	CNCHYM 03970				N. C. D. A				Adult							HYCND1800-11
2	Other material	BIOUG04245-C02				Jarret Hardisty				Adult							CNWLF656-12
2	Other material	BIOUG00989-G12				Alex Smith				Adult							ASGLF337-11
2	Other material	BIOUG01309-D01				Paul Hebert				Adult							PHSEP1889-11
2	Other material	BIOUG00914-E08				Alex Smith				Adult							ASGLF119-11
2	Other material	BIOUG11908-H02				F.Tremblay				Adult							CNFNR2706-14
2	Other material	BIOUG11903-A01				F.Tremblay				Adult							CNFNR2146-14
2	Other material	BIOUG12293-B06				F.Tremblay				Adult							CNFNT1416-14
2	Other material	BIOUG10405-C03				F.Tremblay				Adult							CNFNF984-14
2	Other material	BIOUG06873-G07				Cyndi Smith				Adult							CNWLM309-13
2	Other material	MIC 000059				J. McDunnough			Female	Adult							MHABR059-09
2	Other material	CNCHYM 00090				N. C. D. A				Adult							HYCND1799-11
2	Other material	MIC 000064							Male	Adult							MHABR064-09
2	Other material	BIOUG11904-C07				F.Tremblay				Adult							CNFNR2271-14
2	Other material	BIOUG00991-B06				Alex Smith				Adult							ASGLF366-11
2	Other material	BIOUG09238-D12				BIOBus 2012				Adult							SSPAC13669-13
2	Other material	BIOUG12038-B01				F.Tremblay				Adult							CNFNS943-14
2	Other material	BIOUG00989-A07				Alex Smith				Adult							ASGLF260-11
2	Other material	BIOUG10479-G03				F.Tremblay				Adult							CNFNF2105-14
2	Other material	BIOUG11908-G11				F.Tremblay				Adult							CNFNR2703-14
2	Other material	BIOUG03486-E11				Jarret Hardisty				Adult							CNWLF272-12
2	Other material	WMIC 0240				M. Sharkey				Adult							CNCHX240-09
2	Other material	BIOUG04245-B04				Jarret Hardisty				Adult							CNWLF646-12
2	Other material	MIC 000062							Female	Adult							MHABR062-09
2	Other material	BIOUG11907-B04				F.Tremblay				Adult							CNFNR2541-14
2	Other material	BIOUG01327-H05				James Sones				Adult							JSHYP610-11
3	Other material	BIOUG11625-E04				Cavan Harpur				Adult							CNPKJ648-14
3	Other material	BIOUG01657-E06				J. Cossey				Adult							NCCC149-11
3	Other material	07PROBE-22328				A.Renaud				Adult							ASWAV869-08
3	Other material	BIOUG11759-F05				Matt Davis				Adult							CNKJF1743-14
3	Other material	CAM0960				H. Goulet, A. Badiss, C. Boudeault				Adult							CNCHX090-09
3	Other material	BIOUG14172-C09				Cavan Harpur				Adult							CNPKO3073-14
3	Other material	BIOUG01631-D07				James Sones				Adult							JSSEP718-11
3	Other material	BIOUG08683-C10				BIO Collections Staff				Adult							SMTPD5208-13
3	Other material	BIOUG14172-G04				Cavan Harpur				Adult							CNPKO3116-14
3	Other material	CAM0009				H. Goulet				Adult							CNCHZ199-09
3	Other material	BIOUG08669-D07				BIO Collections Staff				Adult							MBIOD945-13
3	Other material	CAM0940				H. Goulet, A. Badiss, C. Boudeault				Adult							CNCHX070-09
3	Other material	MIC 000087							Female	Adult							MHABR087-09
3	Other material	BIOUG08641-D09				M.Neerhof, S.Lipskie				Adult							SMTPD3239-13
3	Other material	BIOUG08683-G07				BIO Collections Staff				Adult							SMTPD5253-13
3	Other material	BIOUG08663-H08				Anne Parkhill				Adult							SMTPD4869-13
3	Other material	BIOUG09765-A01				Lydia Attard, Kyla Greenham				Adult							CNROS470-13
3	Other material	BIOUG08683-C04				BIO Collections Staff				Adult							SMTPD5202-13
3	Other material	BIOUG14108-F04				Cavan Harpur				Adult							CNPKO1489-14
3	Other material	BIOUG08647-G04				Lisa Cairncross				Adult							SMTPD3828-13
3	Other material	BIOUG09932-C07				BIO Collections Staff				Adult							MBION508-14
3	Other material	HYM00001023				Goulet & Boudreault				Adult							ASWA309-08
3	Other material	BIOUG10202-A04				Chris Johnstone				Adult							CNGBG1411-14
3	Other material	CAM0342				Goulet & Fernandez				Adult							CNCHZ532-09
3	Other material	MIC 000903				H. Goulet, A. Badiss, C. Boudeault				Adult							CNCHZ1095-09
3	Other material	BIOUG11707-A06				Cavan Harpur				Adult							CNPKJ2122-14
3	Other material	HYM00001022				Goulet & Boudreault				Adult							ASWA308-08
3	Other material	BIOUG06823-D09				Thousand Islands NP				Adult							CNSLS106-13
3	Other material	BIOUG08647-C01				Lisa Cairncross				Adult							SMTPD3777-13
3	Other material	MIC 000910				H. Goulet, A. Badiss, C. Boudeault				Adult							CNCHZ1102-09
3	Other material	CAM0526				A. Bennett				Adult							CNCHZ1146-09
3	Other material	CAM0962				H. Goulet, A. Badiss, C. Boudeault				Adult							CNCHX092-09
3	Other material	MIC 000493				H. Goulet, A. Badiss, C. Boudeault				Adult							CNCHZ685-09
3	Other material	BIOUG06549-D07				Nicole Labine				Adult							CNWBH1210-13
3	Other material	BIOUG03220-A01				Heidi Brown				Adult							CNPPC821-12
3	Other material	CAM0290				H. Goulet, A. Badiss, C. Boudeault				Adult							CNCHZ480-09
3	Other material	MIC 000637				H. Goulet				Adult							CNCHZ829-09
3	Other material	CAM0011				H. Goulet				Adult							CNCHZ201-09
3	Other material	HYM00001027				Goulet & Boudreault				Adult							ASWA313-08
3	Other material	BIOUG06823-E10				Thousand Islands NP				Adult							CNSLS119-13
3	Other material	CAM0939				H. Goulet, A. Badiss, C. Boudeault				Adult							CNCHX069-09
3	Other material	BIOUG11771-G06				Cavan Harpur				Adult							CNPKJ2479-14
3	Other material	BIOUG08748-E07				BIO Collections Staff				Adult							MBIOE1290-13
3	Other material	CAM0352				Goulet & Fernandez				Adult							CNCHZ542-09
3	Other material	CAM0448				S. Peck				Adult							CNCHZ638-09
3	Other material	BIOUG09807-F11				BIO Collections Staff				Adult							MBIOK461-14
3	Other material	BIOUG06471-C10				BIOBus 2012				Adult							SSBAF2145-13
3	Other material	CNCH3194				Goulet & Bouderault				Adult							CNCHV264-10
3	Other material	BIOUG03220-F05				Heidi Brown				Adult							CNPPC885-12
3	Other material	CAM0289				H. Goulet, A. Badiss, C. Boudeault				Adult							CNCHZ479-09
3	Other material	BIOUG01657-F10				J. Cossey				Adult							NCCC165-11
3	Other material	CAM0344				Goulet & Fernandez				Adult							CNCHZ534-09
3	Other material	HYM00001003				Bennet & Barnes				Adult							ASWA289-08
3	Other material	CAM0525				A. Bennett				Adult							CNCHZ1145-09
3	Other material	BIOUG08643-F01				Linda Phillips				Adult							SMTPD3455-13
3	Other material	MIC 000090				L. Masner			Female	Adult							MHABR090-09
3	Other material	BIOUG00761-A09				Brandon Laforest				Adult							JBHCI617-11
3	Other material	HYM00000665.2								Adult							ASWAY519-08
3	Other material	BIOUG09925-E09				BIO Collections Staff				Adult							MBIOL366-14
3	Other material	MIC 000084				L. Milne			Female	Adult							MHABR084-09
3	Other material	BIOUG01572-H03				J. Cossey				Adult							NCCC087-11
3	Other material	CAM0114				H. Goulet				Adult							CNCHZ304-09
3	Other material	BIOUG14107-D02				Cavan Harpur				Adult							CNPKO1368-14
3	Other material	CAM0345				Goulet & Fernandez				Adult							CNCHZ535-09
3	Other material	CAM0963				H. Goulet, A. Badiss, C. Boudeault				Adult							CNCHX093-09
3	Other material	CAM0288				H. Goulet, A. Badiss, C. Boudeault				Adult							CNCHZ478-09
3	Other material	CAM0341				Goulet & Fernandez				Adult							CNCHZ531-09
3	Other material	CAM0106				H. Goulet				Adult							CNCHZ296-09
3	Other material	BIOUG06823-E06				Thousand Islands NP				Adult							CNSLS115-13
3	Other material	HYM00001019				Goulet & Boudreault				Adult							ASWA305-08
3	Other material	CAM0154				H. Goulet				Adult							CNCHZ344-09
3	Other material	CAM0340				Goulet & Fernandez				Adult							CNCHZ530-09
3	Other material	HYM00001028				Goulet & Boudreault				Adult							ASWA314-08
3	Other material	HYM00001024				Goulet & Boudreault				Adult							ASWA310-08
3	Other material	CAM0161				H. Goulet				Adult							CNCHZ351-09
3	Other material	BIOUG12486-D10				Park Staff				Adult							CNMIG236-14
3	Other material	PCPP10-0466				T.F.Mitterboeck, C.Vandermeer, V.Junea, C.Sobel				Adult							BBHYN072-10
3	Other material	BIOUG12736-B05				J.Garber, M.Davis				Adult							CNKJN622-14
3	Other material	10BBHYM-1225				Biobus 2010				Adult							BBHYH202-10
3	Other material	HYM00001004				Goulet & Boudreault				Adult							ASWA290-08
3	Other material	CAM0008				H. Goulet				Adult							CNCHZ198-09
3	Other material	BIOUG08799-G08				BIO Collections Staff				Adult							MBIOE1410-13
3	Other material	CAM0521				A. Bennett				Adult							CNCHZ1141-09
3	Other material	BIOUG04041-A02				Thousand Islands NP				Adult							CNSLK104-12
3	Other material	BIOUG03979-A07				Thousand Islands NP				Adult							CNSLI393-12
3	Other material	BIOUG03979-B04				Thousand Islands NP				Adult							CNSLI402-12
3	Other material	BIOUG00991-B03				Alex Smith				Adult							ASGLF363-11
3	Other material	CAM0166				H. Goulet				Adult							CNCHZ356-09
3	Other material	CAM0103				H. Goulet				Adult							CNCHZ293-09
3	Other material	BIOUG07898-C04				BIO Team				Adult							RBINA1006-13
3	Other material	BIOUG09931-A07				BIO Collections Staff				Adult							MBION389-14
3	Other material	BIOUG12977-D11				Medo Toure				Adult							CNLMG1235-14
3	Other material	BIOUG08641-G07				M.Neerhof, S.Lipskie				Adult							SMTPD3273-13
3	Other material	CNCHYM 00107				N.C.D.A				Adult							HYCND1817-11
3	Other material	CAM0938				H. Goulet, A. Badiss, C. Boudeault				Adult							CNCHX068-09
3	Other material	CAM0348				Goulet & Fernandez				Adult							CNCHZ538-09
3	Other material	BIOUG08647-G07				Lisa Cairncross				Adult							SMTPD3831-13
3	Other material	BIOUG03979-B03				Thousand Islands NP				Adult							CNSLI401-12
3	Other material	CAM0346				Goulet & Fernandez				Adult							CNCHZ536-09
3	Other material	BIOUG01795-D07				J. Cossey				Adult							NCCC726-11
3	Other material	BIOUG11996-F03				Cavan Harpur				Adult							CNPKK1009-14
3	Other material	BIOUG11597-E04				D.Crossland, K.Rowter				Adult							CNKJE1961-14
3	Other material	CAM0445				S. Peck				Adult							CNCHZ635-09
3	Other material	BIOUG07903-F12				BIO Team				Adult							RBINA3743-13
3	Other material	CAM0527				A. Bennett				Adult							CNCHZ1147-09
3	Other material	BIOUG01657-C11				J. Cossey				Adult							NCCC130-11
3	Other material	09BBEHY-2030				BIObus 2009				Adult							BBHYF031-10
3	Other material	BIOUG09770-A04				Lydia Attard, Kyla Greenham				Adult							CNROT251-13
3	Other material	CAM0531				A. Bennett				Adult							CNCHZ1151-09
3	Other material	CAM0007				H. Goulet				Adult							CNCHZ197-09
3	Other material	BIOUG12487-D03				Park Staff				Adult							CNMIG324-14
3	Other material	MIC 000086							Female	Adult							MHABR086-09
3	Other material	ASGLE-0880				Alex Smith				Adult							ASGLE690-10
3	Other material	BIOUG03887-F12				Thousand Islands NP				Adult							CNSLJ045-12
3	Other material	BIOUG08665-D12				Anne Parkhill				Adult							SMTPD4966-13
3	Other material	BIOUG09515-E11				BIO Collections Staff				Adult							MBIOI1222-13
3	Other material	CAM0022				H. Goulet				Adult							CNCHZ212-09
3	Other material	CAM0446				S. Peck				Adult							CNCHZ636-09
3	Other material	BIOUG01631-A09				James Sones				Adult							JSAUG1440-11
3	Other material	CAM0635				N. Islam				Adult							ASCNC020-09
3	Other material	CAM0335				Goulet & Fernandez				Adult							CNCHZ525-09
3	Other material	GOU 0570				J. Fernandez				Adult							WOMIA340-11
3	Other material	BIOUG07902-D08				BIO Team				Adult							RBINA3620-13
3	Other material	HYM00001026				Goulet & Boudreault				Adult							ASWA312-08
3	Other material	CAM0523				A. Bennett				Adult							CNCHZ1143-09
3	Other material	CAM0356				Goulet & Fernandez				Adult							CNCHZ546-09
3	Other material	CNCH1358				Goulet & Boudreault				Adult							CNCHW328-09
3	Other material	MIC 000083				O. Peck			Male	Adult							MHABR083-09
3	Other material	BIOUG12977-D01				Medo Toure				Adult							CNLMG1225-14
3	Other material	BIOUG11331-F04				J. Howard, C. Johnstone				Adult							CNGBN1394-14
3	Other material	BIOUG03863-G08				Thousand Islands NP				Adult							CNSLI089-12
3	Other material	BIOUG09765-B03				Lydia Attard, Kyla Greenham				Adult							CNROS484-13
3	Other material	CAM0410				Goulet, Boudreault & Fernandez				Adult							CNCHZ600-09
3	Other material	CAM0113				H. Goulet				Adult							CNCHZ303-09
3	Other material	WMIC 0517				L. Gualtieri				Adult							CNCHX802-09
3	Other material	BIOUG11999-F03				Cavan Harpur				Adult							CNPKK1294-14
3	Other material	BIOUG00726-B07				Brandon Laforest				Adult							JBHCI247-11
3	Other material	CAM0151				H. Goulet				Adult							CNCHZ341-09
3	Other material	CAM0524				A. Bennett				Adult							CNCHZ1144-09
3	Other material	BIOUG03123-B05				Thousand Islands NP				Adult							CNSLE365-12
3	Other material	CAM0013				H. Goulet				Adult							CNCHZ203-09
3	Other material	MIC 000082				G. Shewell			Male	Adult							MHABR082-09
3	Other material	BIOUG14171-B01				Cavan Harpur				Adult							CNPKO2958-14
3	Other material	CAM0942				H. Goulet, A. Badiss, C. Boudeault				Adult							CNCHX072-09
3	Other material	BIOUG09803-F06				BIO Collections Staff				Adult							MBIOK076-14
3	Other material	BIOUG07004-C04				Thousand Islands NP				Adult							CNSLQ251-13
3	Other material	CAM0529				A. Bennett				Adult							CNCHZ1149-09
3	Other material	CAM0074				H. Goulet				Adult							CNCHZ264-09
3	Other material	BIOUG06823-E08				Thousand Islands NP				Adult							CNSLS117-13
3	Other material	BIOUG08665-A11				Anne Parkhill				Adult							SMTPD4929-13
3	Other material	BIOUG01631-G11				James Sones				Adult							JSSEP758-11
3	Other material	BIOUG12974-A03				Medo Toure				Adult							CNLMG906-14
3	Other material	CAM0447				S. Peck				Adult							CNCHZ637-09
3	Other material	BIOUG01597-F04				James Sones				Adult							JSAUG449-11
3	Other material	BIOUG08647-D01				Lisa Cairncross				Adult							SMTPD3789-13
3	Other material	BIOUG01657-F02				J. Cossey				Adult							NCCC157-11
3	Other material	BIOUG09765-A12				Lydia Attard, Kyla Greenham				Adult							CNROS481-13
3	Other material	BIOUG03979-H08				Thousand Islands NP				Adult							CNSLJ189-12
3	Other material	CAM0350				Goulet & Fernandez				Adult							CNCHZ540-09
3	Other material	BIOUG03931-F01				H.Brown				Adult							CNPPJ1314-12
3	Other material	BIOUG09930-G10				BIO Collections Staff				Adult							MBION369-14
3	Other material	BIOUG08648-H10				Lisa Cairncross				Adult							SMTPD3941-13
3	Other material	BIOUG08752-A08				Lydia Attard, Kyla Greenham				Adult							CNROJ908-13
3	Other material	BIOUG12497-F12				Park Staff				Adult							CNMIG1286-14
3	Other material	BIOUG08665-F02				Anne Parkhill				Adult							SMTPD4980-13
3	Other material	BIOUG09930-E06				BIO Collections Staff				Adult							MBION341-14
3	Other material	CAM0120				H. Goulet				Adult							CNCHZ310-09
3	Other material	BIOUG01661-E11				J. Cossey				Adult							NCCC249-11
3	Other material	BIOUG09765-A06				Lydia Attard, Kyla Greenham				Adult							CNROS475-13
3	Other material	CAM0389				Boudreault, Goulet & Fernandez				Adult							CNCHZ579-09
3	Other material	HYM00001020				Goulet & Boudreault				Adult							ASWA306-08
3	Other material	CAM0286				H. Goulet, A. Badiss, C. Boudeault				Adult							CNCHZ476-09
3	Other material	CAM0163				H. Goulet				Adult							CNCHZ353-09
3	Other material	CAM0351				Goulet & Fernandez				Adult							CNCHZ541-09
3	Other material	TDWG-0384				BIObus: A.Borisenko, R.Labbee, V.Levesque-Beaudin, M.Milton, J.Smith, S.Ratnasingham				Adult							TDWGB248-10
3	Other material	CAM0413				Boudreault, Goulet & Fernandez				Adult							CNCHZ603-09
3	Other material	BIOUG06823-D07				Thousand Islands NP				Adult							CNSLS104-13
3	Other material	CNCHYM 00106				F. Naumann				Adult							HYCND1816-11
3	Other material	BIOUG08499-C11				Kristen McGuire				Adult							SMTPD1460-13
3	Other material	CAM0360				Goulet & Fernandez				Adult							CNCHZ550-09
3	Other material	CAM0349				Goulet & Fernandez				Adult							CNCHZ539-09
3	Other material	CAM0115				H. Goulet				Adult							CNCHZ305-09
3	Other material	MIC 000085				H. Boyce			Female	Adult							MHABR085-09
3	Other material	BIOUG03979-G06				Thousand Islands NP				Adult							CNSLJ175-12
3	Other material	CAM0964				H. Goulet, A. Badiss, C. Boudeault				Adult							CNCHX094-09
3	Other material	CAM0025				H. Goulet				Adult							CNCHZ215-09
3	Other material	MIC 000088							Female	Adult							MHABR088-09
3	Other material	BIOUG08807-A09				BIO Collections Staff				Adult							MBIOE2286-13
3	Other material	CAM0101				H. Goulet				Adult							CNCHZ291-09
3	Other material	BIOUG09925-F01				BIO Collections Staff				Adult							MBIOL370-14
3	Other material	BIOUG09345-D07				BIO Collections Staff				Adult							MBIOH323-13
3	Other material	BIOUG09925-A01				BIO Collections Staff				Adult							MBIOL310-14
3	Other material	BIOUG14261-G11				Medo Toure				Adult							CNLMP1391-14
3	Other material	CAM0062				H. Goulet				Adult							CNCHZ252-09
3	Other material	BIOUG08665-D10				Anne Parkhill				Adult							SMTPD4964-13
3	Other material	CAM0076				H. Goulet				Adult							CNCHZ266-09
3	Other material	BIOUG11771-G09				Cavan Harpur				Adult							CNPKJ2482-14
3	Other material	BIOUG09807-D05				BIO Collections Staff				Adult							MBIOK431-14
3	Other material	CAM0530				A. Bennett				Adult							CNCHZ1150-09
3	Other material	HYM00001021				Goulet & Boudreault				Adult							ASWA307-08
3	Other material	CAM0528				A. Bennett				Adult							CNCHZ1148-09
3	Other material	10BBCHY-1304				BIObus 2010				Adult							BBHYJ345-10
3	Other material	CNCH1025				L. Masner				Adult							CNCHX1040-09
3	Other material	CAM0399				Boudreault, Goulet & Fernandez				Adult							CNCHZ589-09
3	Other material	BIOUG07902-D06				BIO Team				Adult							RBINA3618-13
3	Other material	MIC 000089							Female	Adult							MHABR089-09
3	Other material	BIOUG01631-A05				James Sones				Adult							JSAUG1436-11
3	Other material	CAM0941				H. Goulet, A. Badiss, C. Boudeault				Adult							CNCHX071-09
3	Other material	CAM0961				H. Goulet, A. Badiss, C. Boudeault				Adult							CNCHX091-09
3	Other material	BIOUG10641-G12				Chris Johnstone				Adult							CNGBJ1514-14
3	Other material	BIOUG09631-C02				BIO Collections Staff				Adult							MBIOI1284-13
3	Other material	BIOUG14099-G10				Cavan Harpur				Adult							CNPKO652-14
3	Other material	BIOUG11758-F08				Matt Davis				Adult							CNKJF1651-14
3	Other material	10BBCHY-1305				BIObus 2010				Adult							BBHYJ346-10
3	Other material	CAM0522				A. Bennett				Adult							CNCHZ1142-09
3	Other material	CAM0347				Goulet & Fernandez				Adult							CNCHZ537-09
3	Other material	CNCHYM 00105				D. Shanek				Adult							HYCND1815-11
3	Other material	BIOUG14170-E05				Cavan Harpur				Adult							CNPKO2903-14
3	Other material	CAM0054				H. Goulet				Adult							CNCHZ244-09
3	Other material	HYM00000665								Adult							DSWAS984-07
3	Other material	BIOUG08749-G01				Lydia Attard, Kyla Greenham				Adult							CNROJ688-13
3	Other material	TDWG-0167				BIObus: A.Borisenko, R.Labbee, V.Levesque-Beaudin, M.Milton, J.Smith, S.Ratnasingham				Adult							TDWGB052-10
3	Other material	07PROBE-23393				A.Renaud				Adult							ASWAX959-08
3	Other material	BIOUG07902-D03				BIO Team				Adult							RBINA3615-13
3	Other material	CAM0099				H. Goulet				Adult							CNCHZ289-09
3	Other material	BIOUG08565-E09				Barb Maschke				Adult							SMTPD1793-13
3	Other material	MIC 000666				Goulet & Fernandez				Adult							CNCHZ858-09
3	Other material	CAM0146				H. Goulet				Adult							CNCHZ336-09
3	Other material	BIOUG09801-C03				BIO Collections Staff				Adult							MBIOJ817-13
3	Other material	MIC 000488				H. Goulet, A. Badiss, C. Boudeault				Adult							CNCHZ680-09
3	Other material	BIOUG01572-D01				J. Cossey				Adult							NCCC037-11
3	Other material	HYM00001025				Goulet & Boudreault				Adult							ASWA311-08
3	Other material	CAM0072				H. Goulet				Adult							CNCHZ262-09
3	Other material	CAM0024				H. Goulet				Adult							CNCHZ214-09
3	Other material	BIOUG11726-F01				J. Howard, C. Johnstone				Adult							CNGBN2850-14
3	Other material	BIOUG12460-D06				Park Staff				Adult							CNMIG137-14
3	Other material	BIOUG09930-G04				BIO Collections Staff				Adult							MBION363-14
3	Other material	BIOUG03863-E06				Thousand Islands NP				Adult							CNSLH124-12
3	Other material	CAM0039				H. Goulet				Adult							CNCHZ229-09
3	Other material	CAM0409				Goulet, Boudreault & Fernandez				Adult							CNCHZ599-09
4	Other material	CBRA0492				J. Cossentine				Adult							CNCHV584-10
4	Other material	CBRA0493				H. Fry			Female	Adult							CNCHV585-10
4	Other material	CNCHYM 00215				Doganlar				Adult							HYCNE025-11
4	Other material	CBRA0491				J. Cossentine				Adult							CNCHV583-10
4	Other material	MIC 000009				T. Renault			Female	Adult							MHABR009-09
4	Other material	CBRA0490				J. Cossentine				Adult							CNCHV582-10
4	Other material	MIC 000007				F. Peters			Female	Adult							MHABR007-09
4	Other material	MIC 000013				H. Fry			Female	Adult							MHABR013-09
4	Other material	MIC 000010				T. Renault			Female	Adult							MHABR010-09
4	Other material	MIC 000011				J. Cossentine			Female	Adult							MHABR011-09
4	Other material	MIC 000014				H. Fry			Male	Adult							MHABR014-09
4	Other material	MIC 000005				Docanlar			Female	Adult							MHABR005-09
4	Other material	CBRA0495				H. Fry			Female	Adult							CNCHV587-10
4	Other material	CBRA0494				H. Fry			Female	Adult							CNCHV586-10
4	Other material	MIC 000012				J. Cossentine			Male	Adult							MHABR012-09
4	Other material	MIC 000006				Doganlar			Male	Adult							MHABR006-09
4	Other material	MIC 000008				F. Peters			Male	Adult							MHABR008-09
5	Other material	BIOUG10637-H02				Anderson				Adult							CNGMI700-14
5	Other material	07PROBE-22321				A.Renaud				Adult							ASWAV862-08
5	Other material	BIOUG04486-G10				Rod Thompson, Eric Knight				Adult							CNPAD006-13
5	Other material	MIC 000638				Goulet & Boudreault				Adult							CNCHZ830-09
5	Other material	07PROBE-20921								Adult							ASWAT273-08
6	Other material	CNCHYM 00401				Mailloux				Adult							HYCNE211-11
6	Other material	BIOUG08665-E05				Anne Parkhill				Adult							SMTPD4971-13
6	Other material	BIOUG01258-H06				James Sones				Adult							JSHYO850-11
6	Other material	CAM0542				A. Bennett				Adult							CNCHZ1162-09
6	Other material	BIOUG08742-H10				BIO Collections Staff				Adult							MBIOE759-13
6	Other material	CNCHYM 00404				H. T. Streu				Adult							HYCNE214-11
6	Other material	CNCHYM 00403								Adult							HYCNE213-11
6	Other material	CNCHYM 00402								Adult							HYCNE212-11
6	Other material	CAM1034				H. Goulet				Adult							CNCHX164-09
6	Other material	BIOUG03438-B06				Heidi Brown				Adult							CNPPD2118-12
6	Other material	CAM0893				H. Goulet				Adult							CNCHX023-09
6	Other material	BIOUG03445-F01				Tyler Peters				Adult							CNPPE479-12
7	Other material	CNCHYM 01091				Doganlar				Adult							HYCNE902-11
7	Other material	CNCHYM 01093								Adult							HYCNE904-11
7	Other material	CNCHYM 01089				Doganlar				Adult							HYCNE900-11
7	Other material	CNCHYM 00216				Doganlar				Adult							HYCNE026-11
8	Other material	CNCHYM 01363				D. B. Lyons				Adult							HYCNE1175-11
8	Other material	CNCHYM 01366				W. R. Richards				Adult							HYCNE1178-11
8	Other material	CNCHYM 01375				W. Mason				Adult							HYCNE1187-11
8	Other material	GOU 0314				Sharkey & Read				Adult							CNCBA789-10
8	Other material	CNCHYM 01365				J. R. Vockeroth				Adult							HYCNE1177-11
8	Other material	CAM0473				H. Goulet, A. Badiss, C. Boudeault				Adult							CNCHZ663-09
8	Other material	CNCHYM 01369				G. E. Shewell				Adult							HYCNE1181-11
8	Other material	CAM0470				H. Goulet, A. Badiss, C. Boudeault				Adult							CNCHZ660-09
8	Other material	CAM0471				H. Goulet, A. Badiss, C. Boudeault				Adult							CNCHZ661-09
8	Other material	CAM0468				H. Goulet, A. Badiss, C. Boudeault				Adult							CNCHZ658-09
8	Other material	CNCHYM 01370				J. G. Chillcott				Adult							HYCNE1182-11
8	Other material	CAM0463				H. Goulet, A. Badiss, C. Boudeault				Adult							CNCHZ653-09
8	Other material	CAM0465				H. Goulet, A. Badiss, C. Boudeault				Adult							CNCHZ655-09
8	Other material	CAM0464				H. Goulet, A. Badiss, C. Boudeault				Adult							CNCHZ654-09
8	Other material	CNCHYM 01368				R. B. Madge				Adult							HYCNE1180-11
8	Other material	CNCHYM 01367				McMillan				Adult							HYCNE1179-11
8	Other material	CAM0462				H. Goulet, A. Badiss, C. Boudeault				Adult							CNCHZ652-09
8	Other material	CNCHYM 01371				J. R. Vockeroth				Adult							HYCNE1183-11
8	Other material	CAM0469				H. Goulet, A. Badiss, C. Boudeault				Adult							CNCHZ659-09
8	Other material	CNCHYM 01376								Adult							HYCNE1188-11
8	Other material	CNCHYM 01364				W. R. M. Mason				Adult							HYCNE1176-11
8	Other material	CNCHYM 01377								Adult							HYCNE1189-11
8	Other material	CNCHYM 01378				L. Dumouchel				Adult							HYCNE1190-11
8	Other material	BIOUG01082-E12				James Sones				Adult							JSHYN833-11
8	Other material	CAM0474				H. Goulet, A. Badiss, C. Boudeault				Adult							CNCHZ664-09
8	Other material	CAM0466				H. Goulet, A. Badiss, C. Boudeault				Adult							CNCHZ656-09
8	Other material	CAM0472				H. Goulet, A. Badiss, C. Boudeault				Adult							CNCHZ662-09
8	Other material	CAM0467				H. Goulet, A. Badiss, C. Boudeault				Adult							CNCHZ657-09
9	Other material	CAM0278				H. Goulet				Adult							CNCHZ468-09
9	Other material	BIOUG04442-A12				BIOBus 2012				Adult							SSBAD5451-13
9	Other material	HYM00000958				Goulet & Boudrealt				Adult							DSWAS929-07
9	Other material	CNCH3205				Goulet & Bouderault				Adult							CNCHV275-10
9	Other material	HYM00000818								Adult							DSWAS761-07
9	Other material	CNCH3212				Goulet & Bouderault				Adult							CNCHV282-10
9	Other material	BIOUG07357-A10				Chrystal Simon				Adult							NGNAC1789-13
9	Other material	HYM00000994				Goulet & Boudrealt				Adult							DSWAS965-07
9	Other material	HYM00000974				Goulet & Boudrealt				Adult							DSWAS945-07
9	Other material	HYM00000953				Goulet & Boudrealt				Adult							DSWAS924-07
9	Other material	HYM00000821.2				R.Gwatkin				Adult							ASWAY564-08
9	Other material	CNCHYM 03136				F. I. S.				Adult							HYCNE1821-11
9	Other material	HYM00000821				R.Gwatkin				Adult							DSWAS764-07
9	Other material	HYM00000941				Goulet & Boudrealt				Adult							DSWAS912-07
9	Other material	CNCH3209				Goulet & Bouderault				Adult							CNCHV279-10
9	Other material	CNCH3215				Goulet & Bouderault				Adult							CNCHV380-10
9	Other material	CNCHYM 03143				F. I. S.				Adult							HYCNE1828-11
9	Other material	HYM00000996				Goulet & Boudrealt				Adult							DSWAS967-07
9	Other material	CNCH0955				Goulet & Boudreault				Adult							CNCHX970-09
9	Other material	HYM00000948				Goulet & Boudrealt				Adult							DSWAS919-07
9	Other material	CNCH3208				Goulet & Bouderault				Adult							CNCHV278-10
9	Other material	HYM00000986				Goulet & Boudrealt				Adult							DSWAS957-07
9	Other material	HYM00000820				J.G.Chillcot				Adult							DSWAS763-07
9	Other material	HYM00000971				Goulet & Boudrealt				Adult							DSWAS942-07
9	Other material	HYM00000955				Goulet & Boudrealt				Adult							DSWAS926-07
9	Other material	CNCH3306				Goulet & Bouderault				Adult							CNCHV375-10
9	Other material	HYM00000972				Goulet & Boudrealt				Adult							DSWAS943-07
9	Other material	HYM00000947				Goulet & Boudrealt				Adult							DSWAS918-07
9	Other material	CNCH3310				Goulet & Bouderault				Adult							CNCHV379-10
9	Other material	HYM00000931				Goulet & Boudrealt				Adult							DSWAS902-07
9	Other material	HYM00000985				Goulet & Boudrealt				Adult							DSWAS956-07
9	Other material	CNCH3203				Goulet & Bouderault				Adult							CNCHV273-10
9	Other material	CNCHYM 03141				H. B. Poole				Adult							HYCNE1826-11
9	Other material	CNCH0995				Goulet & Boudreault				Adult							CNCHX1010-09
9	Other material	HYM00000331				Boudreault & Goulet,				Adult							CNCHY059-07
9	Other material	HYM00000939				Goulet & Boudrealt				Adult							DSWAS910-07
9	Other material	HYM00000969				Goulet & Boudrealt				Adult							DSWAS940-07
9	Other material	CNCH0993				Goulet & Boudreault				Adult							CNCHX1008-09
9	Other material	CNCHYM 03145				C. M. Yoshimoto				Adult							HYCNE1830-11
9	Other material	HYM00000819								Adult							DSWAS762-07
9	Other material	CNCHYM 03138				F. I. S.				Adult							HYCNE1823-11
9	Other material	CNCH3204				Goulet & Bouderault				Adult							CNCHV274-10
9	Other material	CNCH3213				Goulet & Bouderault				Adult							CNCHV283-10
9	Other material	BIOUG00989-E07				Alex Smith				Adult							ASGLF308-11
9	Other material	BIOUG03931-A10				H.Brown				Adult							CNPPJ1263-12
9	Other material	CNCH0965				Goulet & Boudreault				Adult							CNCHX980-09
9	Other material	HYM00001322				Goulet, Boudreault & Fernandez				Adult							ASWA608-08
9	Other material	CAM0437				Goulet & Fernandez				Adult							CNCHZ627-09
9	Other material	HYM00000990				Goulet & Boudrealt				Adult							DSWAS961-07
9	Other material	CNCHYM 03139				F. I. S.				Adult							HYCNE1824-11
9	Other material	HYM00000975				Goulet & Boudrealt				Adult							DSWAS946-07
9	Other material	CNCH3206				Goulet & Bouderault				Adult							CNCHV276-10
9	Other material	HYM00000935				Goulet & Boudrealt				Adult							DSWAS906-07
9	Other material	CNCH1008				Goulet & Boudreault				Adult							CNCHX1023-09
9	Other material	HYM00000987				Goulet & Boudrealt				Adult							DSWAS958-07
9	Other material	CNCH0987				Goulet & Boudreault				Adult							CNCHX1002-09
9	Other material	08BBHYM-1368				J.Cossey, N.Jeffery, J.Straka				Adult							BBHYM324-09
9	Other material	HYM00000968				Goulet & Boudrealt				Adult							DSWAS939-07
9	Other material	CNCHYM 03144								Adult							HYCNE1829-11
9	Other material	HYM00000936				Goulet & Boudrealt				Adult							DSWAS907-07
9	Other material	HYM00000951				Goulet & Boudrealt				Adult							DSWAS922-07
9	Other material	HYM00001320				Goulet, Boudreault & Fernandez				Adult							ASWA606-08
9	Other material	HYM00000920								Adult							DSWAS863-07
9	Other material	CNCHYM 03137								Adult							HYCNE1822-11
9	Other material	HYM00000820.2				J.G.Chillcot				Adult							ASWAY563-08
9	Other material	HYM00000976				Goulet & Boudrealt				Adult							DSWAS947-07
9	Other material	HYM00000943				Goulet & Boudrealt				Adult							DSWAS914-07
9	Other material	HYM00000934				Goulet & Boudrealt				Adult							DSWAS905-07
9	Other material	HYM00000938				Goulet & Boudrealt				Adult							DSWAS909-07
9	Other material	HYM00000950				Goulet & Boudrealt				Adult							DSWAS921-07
9	Other material	HYM00000956				Goulet & Boudrealt				Adult							DSWAS927-07
9	Other material	HYM00000973				Goulet & Boudrealt				Adult							DSWAS944-07
9	Other material	HYM00000970				Goulet & Boudrealt				Adult							DSWAS941-07
9	Other material	HYM00000940				Goulet & Boudrealt				Adult							DSWAS911-07
9	Other material	CNCHYM 03142				J. F. McAlpine				Adult							HYCNE1827-11
9	Other material	HYM00000942				Goulet & Boudrealt				Adult							DSWAS913-07
9	Other material	CNCHYM 03140				B. Poole				Adult							HYCNE1825-11
9	Other material	07PROBE-20072				A.Renaud				Adult							ASWA270-08
10	Other material	CNCHYM 03217				S. M. Clark				Adult							HYCNF002-11
10	Other material	HYM00000806				J.G.Chillcot				Adult							DSWAS749-07
10	Other material	07PROBE-22423				A.Renaud				Adult							ASWAV964-08
10	Other material	BIOUG14184-G04				BIObus 2013				Adult							SSGBB2792-14
10	Other material	HYM00000809.2				J. G. Chillcot				Adult							ASWAY600-08
10	Other material	10PROBE-29276				Brandon Laforest				Adult							JBHCH968-10
10	Other material	HYM00000798				J.G.Chillcot				Adult							ASWAS997-07
10	Other material	CAM0958				H. Goulet, A. Badiss, C. Boudeault				Adult							CNCHX088-09
10	Other material	HYM00000981				Goulet & Boudrealt				Adult							DSWAS952-07
10	Other material	BIOUG03191-A01				Stephanie Church				Adult							CNEIB1042-12
10	Other material	HYM00000792.2				J. G. Chillcot				Adult							ASWAY590-08
10	Other material	CAM0427				Goulet & Fernandez				Adult							CNCHZ617-09
10	Other material	HYM00000795				J.G.Chillcot				Adult							ASWAS994-07
10	Other material	HYM00000813				J.G.Chillcot				Adult							DSWAS756-07
10	Other material	GOU 0582				J. Fernandez				Adult							WOMIA352-11
10	Other material	07PROBE-23399				A.Renaud				Adult							ASWAX965-08
10	Other material	HYM00000922				J.G.Chillcot				Adult							DSWAS865-07
10	Other material	CAM0412				Goulet, Boudreault & Fernandez				Adult							CNCHZ602-09
10	Other material	07PROBE-23413				A.Renaud				Adult							ASWAX979-08
10	Other material	10BBCHY-2887				BIObus 2010				Adult							BBHYK928-10
10	Other material	CAM0422				Goulet & Fernandez				Adult							CNCHZ612-09
10	Other material	HYM00000945				Goulet & Boudrealt				Adult							DSWAS916-07
10	Other material	HYM00000814.2				J.G.Chillcot				Adult							ASWAY595-08
10	Other material	CAM0435				Goulet & Fernandez				Adult							CNCHZ625-09
10	Other material	HYM00000801				J.G.Chillcot				Adult							DSWAS744-07
10	Other material	CAM0959				H. Goulet, A. Badiss, C. Boudeault				Adult							CNCHX089-09
10	Other material	HYM00000964				Goulet & Boudrealt				Adult							DSWAS935-07
10	Other material	HYM00000794				J.G.Chillcot				Adult							ASWAS993-07
10	Other material	07PROBE-22417				A.Renaud				Adult							ASWAV958-08
10	Other material	GOU 0590				J. Fernandez				Adult							WOMIA360-11
10	Other material	CAM0936				H. Goulet, A. Badiss, C. Boudeault				Adult							CNCHX066-09
10	Other material	07PROBE-20806				A.Renaud				Adult							ASWAT346-08
10	Other material	CAM0434				Goulet & Fernandez				Adult							CNCHZ624-09
10	Other material	CAM0948				H. Goulet, A. Badiss, C. Boudeault				Adult							CNCHX078-09
10	Other material	HYM00000802				J.G.Chillcot				Adult							DSWAS745-07
10	Other material	HYM00001682				Goulet & Boudreault				Adult							ASWAU310-08
10	Other material	CAM0421				Goulet & Fernandez				Adult							CNCHZ611-09
10	Other material	CAM0416				Goulet & Fernandez				Adult							CNCHZ606-09
10	Other material	HYM00000815				J.G.Chillcot				Adult							DSWAS758-07
10	Other material	CAM0428				Goulet & Fernandez				Adult							CNCHZ618-09
10	Other material	HYM00000816				J.G.Chillcot				Adult							DSWAS759-07
10	Other material	07PROBE-20818				A.Renaud				Adult							ASWAT358-08
10	Other material	CAM0386				Goulet, Boudreault & Fernandez				Adult							CNCHZ576-09
10	Other material	CAM0387				Goulet, Boudreault & Fernandez				Adult							CNCHZ577-09
10	Other material	CAM0944				H. Goulet, A. Badiss, C. Boudeault				Adult							CNCHX074-09
10	Other material	CNCHYM 03216				B. H. Poole				Adult							HYCNF001-11
10	Other material	CAM0952				H. Goulet, A. Badiss, C. Boudeault				Adult							CNCHX082-09
10	Other material	HYM00000815.2				J.G.Chillcot				Adult							ASWAY594-08
10	Other material	CAM0426				Goulet & Fernandez				Adult							CNCHZ616-09
10	Other material	10PROBE-28643				Brandon Laforest				Adult							JBHCH335-10
10	Other material	HYM00000811.2				J.G.Chillcot				Adult							ASWAY598-08
10	Other material	CAM0492				H. Goulet, A. Badiss, C. Boudeault				Adult							CNCHZ1139-09
10	Other material	CAM0945				H. Goulet, A. Badiss, C. Boudeault				Adult							CNCHX075-09
10	Other material	HYM00000603				Goulet & Boudrealt				Adult							CNCHY331-07
10	Other material	CAM0951				H. Goulet, A. Badiss, C. Boudeault				Adult							CNCHX081-09
10	Other material	HYM00000989				Goulet & Boudrealt				Adult							DSWAS960-07
10	Other material	MIC 000900				H. Goulet, A. Badiss, C. Boudeault				Adult							CNCHZ1092-09
10	Other material	07PROBE-20808				A.Renaud				Adult							ASWAT348-08
10	Other material	CAM0365				Goulet & Fernandez				Adult							CNCHZ555-09
10	Other material	CAM0384				Goulet, Boudreault & Fernandez				Adult							CNCHZ574-09
10	Other material	CAM0431				Goulet & Fernandez				Adult							CNCHZ621-09
10		CNCHYM 03218				Becker, Munroe, Mason				Adult							HYCNF003-11
10		MIC 000721				H. Goulet, A. Badiss, C. Boudeault				Adult							CNCHZ913-09
10		HYM00000803				J.G.Chillcot				Adult							DSWAS746-07
10		GOU 0589				J. Fernandez				Adult							WOMIA359-11
10		HYM00000813.2				J.G.Chillcot				Adult							ASWAY596-08
10		CAM0488				H. Goulet, A. Badiss, C. Boudeault				Adult							CNCHZ1135-09
10		HYM00000792				J.G.Chillcot				Adult							ASWAS991-07
10		HYM00000932				Goulet & Boudrealt				Adult							DSWAS903-07
10		BIOUG05353-G06				BIOBus 2012				Adult							SSWLB5177-13
10		HYM00001312				Goulet & Boudreault				Adult							ASWA598-08
10		MIC 000350				G. Shewell				Adult							CNCHZ067-09
10		HYM00000982				Goulet & Boudrealt				Adult							DSWAS953-07
10		10BBCHY-2879				BIObus 2010				Adult							BBHYK920-10
10		09BBEHY-1128				BIObus 2009				Adult							BBHYE128-10
10		HYM00000944				Goulet & Boudrealt				Adult							DSWAS915-07
10		HYM00001329				Goulet, Boudreault & Fernandez				Adult							ASWA615-08
10		09PROBE-A0342				J.M.Cumming				Adult							SAHYM373-10
10		HYM00000804				J.G.Chillcot				Adult							DSWAS747-07
10		07PROBE-24572				A. Renaud				Adult							CNCHV431-10
10		CAM0415				Goulet & Fernandez				Adult							CNCHZ605-09
10		MIC 000723				H. Goulet, A. Badiss, C. Boudeault				Adult							CNCHZ915-09
10		HYM00000793.2				J.G.Chillcot				Adult							ASWAY591-08
10		HYM00000812				J.G.Chillcot				Adult							DSWAS755-07
10		HYM00000796				J.G.Chillcot				Adult							ASWAS995-07
10		HYM00000797				J.G.Chillcot				Adult							ASWAS996-07
10		CAM0417				Goulet & Fernandez				Adult							CNCHZ607-09
10		07PROBE-20789				A.Renaud				Adult							ASWAT329-08
10		GOU 0588				J. Fernandez				Adult							WOMIA358-11
10		CAM0403				Boudreault, Goulet & Fernandez				Adult							CNCHZ593-09
10		MIC 000722				H. Goulet, A. Badiss, C. Boudeault				Adult							CNCHZ914-09
10		CAM0419				Goulet & Fernandez				Adult							CNCHZ609-09
10		CAM0414				Goulet & Fernandez				Adult							CNCHZ604-09
10		BIOUG03882-B11				Roberta Tesar				Adult							CNRMF2687-12
10		HYM00000810				J.G.Chillcot				Adult							DSWAS753-07
10		BIOUG07032-G03				Thousand Islands NP				Adult							CNSLP346-13
10		CAM0430				Goulet & Fernandez				Adult							CNCHZ620-09
10		HYM00000800				J.G.Chillcot				Adult							ASWAS999-07
10		CAM0418				Goulet & Fernandez				Adult							CNCHZ608-09
10		MIC 000923				H. Goulet, A. Badiss, C. Boudeault				Adult							CNCHZ1115-09
10		CAM0383				Boudreault, Goulet & Fernandez				Adult							CNCHZ573-09
10		HYM00000793				J.G.Chillcot				Adult							ASWAS992-07
10		HYM00000808				J.G.Chillcot				Adult							DSWAS751-07
10		HYM00000962				Goulet & Boudrealt				Adult							DSWAS933-07
10		HYM00000814				J.G.Chillcot				Adult							DSWAS757-07
10		CAM0953				H. Goulet, A. Badiss, C. Boudeault				Adult							CNCHX083-09
10		HYM00000604				Goulet & Boudrealt				Adult							CNCHY332-07
10		CAM0429				Goulet & Fernandez				Adult							CNCHZ619-09
10		CAM0382				Boudreault, Goulet & Fernandez				Adult							CNCHZ572-09
10		CAM0385				Goulet, Boudreault & Fernandez				Adult							CNCHZ575-09
10		08BBHYM-1493				BIObus 2008				Adult							BBHYM449-09
10		CAM0438				Goulet & Fernandez				Adult							CNCHZ628-09
10		CAM0423				Goulet & Fernandez				Adult							CNCHZ613-09
10		BIOUG03593-B08				Melanie, Roberta Tesar				Adult							CNRME2000-12
10		HYM00000767				J.G.Chillcot				Adult							ASWAS966-07
10		HYM00000817				J.G.Chillcot				Adult							DSWAS760-07
10		HYM00000805				J.G.Chillcot				Adult							DSWAS748-07
10		HYM00000809				J.G.Chillcot				Adult							DSWAS752-07
10		HYM00000811				J.G.Chillcot				Adult							DSWAS754-07
10		CAM0432				Goulet & Fernandez				Adult							CNCHZ622-09
10		HYM00000921				J.G.Chillcot				Adult							DSWAS864-07
10		MIC 000909				H. Goulet, A. Badiss, C. Boudeault				Adult							CNCHZ1101-09
10		CAM0957				H. Goulet, A. Badiss, C. Boudeault				Adult							CNCHX087-09
10		CAM0955				H. Goulet, A. Badiss, C. Boudeault				Adult							CNCHX085-09
10		HYM00000799				J.G.Chillcot				Adult							ASWAS998-07
10		HYM00000921.2				J. G. Chillcot				Adult							ASWAY592-08
10		HYM00000807				J.G.Chillcot				Adult							DSWAS750-07
[truncated: 106 more columns]

## Sheet: ExternalLinks
Taxon_Local_ID	Link type	Link
